# Supplementary material for: Aminoarylation of alkynes using diarylanilines
Source: Royal Society of Chemistry journal article supplement (doi:10.1039/d4cc01935k), 2024-01-01

Supporting Information

**Aminoarylation of Alkynes using Diarylanilines**

Zi Liu and Michael F. Greaney\*

Department of Chemistry, University of Manchester, Oxford Rd, Manchester M13 9PL, United Kingdom

Table of Contents

|                                 |     |
|---------------------------------|-----|
| 1. General methods              | S2  |
| 2. General procedures           | S2  |
| 3. Compound characterization    | S3  |
| 4. References                   | S25 |
| 5. X-ray crystallography of 17a | S26 |
| 6. NMR spectra                  | S28 |

## 1. General methods

Nuclear magnetic resonance spectra were acquired on either 500 MHz (Bruker® AVII+ 500, Bruker AVIII HD 500) or 400 MHz (Bruker AVIII HD 400, Bruker AVIII 400). All  $^1\text{H}$  NMR spectra are reported in parts per million (ppm) and were measured relative to the signals at 7.26 ppm ( $\text{CHCl}_3$ ), 2.09 ppm (acetone), 2.54 ppm (DMSO) or 5.32 ppm ( $\text{CH}_2\text{Cl}_2$ ). All  $^{13}\text{C}$  NMR spectra were reported in ppm relative to residual  $\text{CHCl}_3$  (77.36 ppm), acetone (30.60 ppm), DMSO (40.45 ppm),  $\text{CH}_2\text{Cl}_2$  (53.80 ppm) and were obtained with  $1\text{H}$ -decoupling. All  $^{19}\text{F}$  chemical shifts were unadjusted from raw data. Data for  $^1\text{H}$  NMR are described as following: chemical shift ( $\delta$  in ppm), multiplicity (s, singlet; d, doublet; t, triplet; q, quartet; quin, quintet; m, multiplet; br, broad signal), coupling constant (Hz), integration.

High resolution mass spectra were obtained on ThermoFisher Scientific Q-Exactive<sup>TM</sup>, Thermo Scientific Exactive plus EMR and Agilent 6530 Q-TOF instruments, using either electrospray ionisation (ESI), atmospheric-pressure chemical ionisation (APCI) as ionisation methods in the positive and negative mode.

Flash column chromatography was carried out by using re-used 10g, 25g or 50g Biotage® Snap Ultra or Biotage Sfär Silica cartridges on a Biotage Isolera Four automated column, using 35-70  $\mu\text{m}$ , 60 Å silica gel for chromatography from ThermoFisher Scientific® or 40-63  $\mu\text{m}$  60 Å silica gel from Sigma-Aldrich.

Melting points (mp) were recorded on a Griffin melting point apparatus to the nearest degree and are uncorrected.

All air and/or moisture sensitive reactions were performed under an atmosphere of dry nitrogen using anhydrous solvent. All solvents for air sensitive reactions were degassed by bubbling  $\text{N}_2$  on the Schlenk line. All commercially available reagents and solvents were used as received without further purification. (R)-2,5,7,8-tetramethyl-2-((4R,8R)-4,8,12-trimethyltridecyl)chroman-6-yl hex-2-ynoate and (S,Z)-3-(2-((1R,3aS,7aR,E)-1-((2R,5R,E)-5,6-dimethylhept-3-en-2-yl)-7a-methyloctahydro-4H-inden-4-ylidene)ethylidene)-4-methylenecyclohexyl hex-2-ynoate were synthesized based on the literature.<sup>1</sup>

## 2. General procedures

### General procedure A – preparation of aniline starting materials

To an oven-dried microwave vial were added aniline (1.2 equiv.), aryl halide (5.0 mmol, 1.0 equiv.),  $\text{Pd}(\text{OAc})_2$  (4 mol%), *rac*-Binap (8 mol%) and  $\text{Cs}_2\text{CO}_3$  (1.4 equiv.). The vial was sealed by a cap and placed on the Schlenk line to evacuate and backfill with  $\text{N}_2$  three times. Then toluene (0.5 M) and aryl halide (1.0 equiv.) (if it is liquid) were added by syringe under a flow of  $\text{N}_2$ . The mixture was stirred at 120 °C for 18 h. After cooling to room temperature, the mixture was filtered through a pad of Celite and washed with ethyl acetate. The filtrate was concentrated under reduced pressure and the residue was purified by column chromatography on silica gel.

### General procedure B – preparation of alkyne starting materials

To a solution of alkyne (10.0 mmol, 1.0 equiv.) in anhydrous THF (0.2M) was dropwise added  $n\text{BuLi}$  (1.1 equiv.) at -78 °C under a nitrogen atmosphere and the reaction mixture was stirred at -78 °C for 30 min. Then ethyl chloroformate (1.2 equiv.) was slowly added by syringe and then warmed to room temperature and stirred until complete. The reaction was quenched with saturated  $\text{NH}_4\text{Cl}$  solution and extracted with ethyl acetate (3 x 30 mL). The combined organic layers were dried over  $\text{Na}_2\text{SO}_4$ , filtered and concentrated under reduced pressure. The residue was purified by column chromatography on silica gel.

### General procedure C - STR

To an oven-dried microwave vial were added diaryl amine **14** (1.2 equiv.), alkyne **15** (1.0 equiv.) and  $\text{Cs}_2\text{CO}_3$  (1.5 equiv.). The vial was sealed by a cap and placed on the Schlenk line to evacuate and backfill with  $\text{N}_2$  three times. Then dimethylacetamide (0.2 M), alkyne **15** (1.0 equiv.) (if it is liquid) were added by syringe under a flow of  $\text{N}_2$ . The mixture was stirred at 70 °C for 18 h. After cooling to room temperature, water and ethyl acetate were added and the phases were separated. The organic phase was washed with brine three times, dried over  $\text{Na}_2\text{SO}_4$  and concentrated. The residue was purified by column chromatography on silica gel.

### 3. Compound characterization

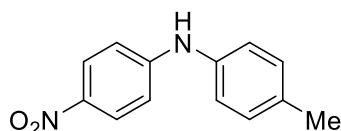

#### 4-methyl-N-(4-nitrophenyl)aniline

Prepared according to general procedure **A** by using 4-nitroaniline and 1-bromo-4-methylbenzene to yield the titled compound as orange solid (0.79, 72%).

**$^1\text{H}$  NMR** (400 MHz, acetone- $d_6$ )  $\delta$  8.39 (s, 1H), 8.12 (d,  $J$  = 9.3 Hz, 2H), 7.29 – 7.18 (m, 4H), 7.09 (d,  $J$  = 9.3 Hz, 2H), 2.36 (s, 3H).

**$^{13}\text{C}$  NMR** (100 MHz, acetone- $d_6$ )  $\delta$  153.1, 140.3, 139.3, 135.2, 131.6, 127.6, 123.5, 114.7, 21.6.

**HRMS (+ESI)**: calcd for  $\text{C}_{13}\text{H}_{12}\text{N}_2\text{O}_2\text{Na}$   $[\text{M}+\text{Na}]^+$  251.0791, found 251.0794.

**mp**: 123-125 °C.

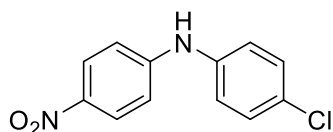

#### 4-chloro-N-(4-nitrophenyl)aniline

Prepared according to general procedure **A** by using 4-nitroaniline and 1-chloro-4-iodobenzene to yield the titled compound as orange solid (0.84 g, 68%).

**$^1\text{H}$  NMR** (400 MHz, acetone- $d_6$ )  $\delta$  8.53 (s, 1H), 8.16 (d,  $J$  = 9.3 Hz, 2H), 7.44 (d,  $J$  = 8.8 Hz, 2H), 7.35 (d,  $J$  = 8.9 Hz, 2H), 7.19 (d,  $J$  = 9.2 Hz, 2H).

**$^{13}\text{C}$  NMR** (100 MHz, acetone- $d_6$ )  $\delta$  152.0, 141.1, 131.0, 129.4, 127.5, 124.0, 123.9, 115.6.

**HRMS (+APCI)**: calcd for  $\text{C}_{12}\text{H}_{10}\text{N}_2\text{O}_2\text{Cl}$   $[\text{M}+\text{H}]^+$  249.0425, found 249.0429.

**mp**: 160-161 °C.

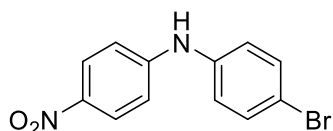

#### 4-bromo-N-(4-nitrophenyl)aniline

Prepared according to general procedure **A** by using 4-nitroaniline and 1-bromo-4-iodobenzene to yield the titled compound as orange solid (1.10 g, 75%).

**$^1\text{H}$  NMR** (400 MHz, acetone- $d_6$ )  $\delta$  8.53 (s, 1H), 8.16 (d,  $J$  = 9.2 Hz, 2H), 7.57 (d,  $J$  = 8.8 Hz, 2H), 7.30 (d,  $J$  = 8.8 Hz, 2H), 7.20 (d,  $J$  = 9.2 Hz, 2H).

**$^{13}\text{C}$  NMR** (100 MHz, acetone- $d_6$ )  $\delta$  151.8, 141.6, 131.1, 127.5, 124.3, 124.2, 116.8, 115.7.

**HRMS (+ESI)**: calcd for  $\text{C}_{12}\text{H}_9\text{N}_2\text{O}_2\text{BrNa}$   $[\text{M}+\text{Na}]^+$  314.9740, found 314.9745.

**mp**: 145-147 °C.

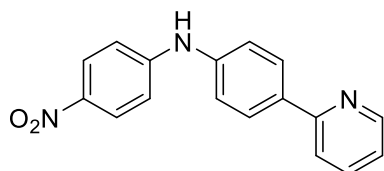

#### 4-nitro-N-(4-(pyridin-2-yl)phenyl)aniline

Prepared according to general procedure **A** by using 4-nitroaniline and 2-(4-bromophenyl)pyridine to yield the titled compound as yellow solid (0.78 g, 53%).

**<sup>1</sup>H NMR** (500 MHz, DMSO-*d*<sub>6</sub>) 9.52 (s, 1H), 8.67 (d, *J* = 3.8 Hz, 1H), 8.15 (t, *J* = 8.5 Hz, 4H), 7.94 (d, *J* = 8.1 Hz, 1H), 7.87 (td, *J* = 7.7, 1.9 Hz, 1H), 7.38 (d, *J* = 8.7 Hz, 2H), 7.33 (ddd, *J* = 7.4, 4.7, 1.1 Hz, 1H), 7.23 – 7.17 (m, 2H).

**<sup>13</sup>C NMR** (125 MHz, DMSO-*d*<sub>6</sub>) δ 156.5, 151.0, 150.4, 142.1, 139.3, 138.1, 134.1, 128.6, 127.1, 123.0, 120.9, 120.5, 115.1.

**HRMS (+ESI)**: calcd for C<sub>17</sub>H<sub>14</sub>N<sub>3</sub>O<sub>2</sub> [M+H]<sup>+</sup> 292.1081, found 292.1082.

mp: 186-188 °C.

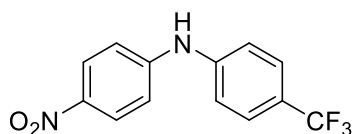

#### 4-nitro-N-(4-(trifluoromethyl)phenyl)aniline

Prepared according to general procedure **A** by using 4-nitroaniline and 1-iodo-4-(trifluoromethyl)benzene to yield the titled compound as yellow solid (0.84 g, 60%).

**<sup>1</sup>H NMR** (400 MHz, acetone-*d*<sub>6</sub>) δ 8.83 (s, 1H), 8.21 (d, *J* = 9.2 Hz, 2H), 7.72 (d, *J* = 8.4 Hz, 2H), 7.51 (d, *J* = 9.0 Hz, 2H), 7.35 (d, *J* = 9.2 Hz, 2H).

**<sup>13</sup>C NMR** (100 MHz, acetone-*d*<sub>6</sub>) δ 150.7, 146.3, 142.1, 128.4 (q, *J* = 3.9 Hz), 127.4, 126.3 (q, *J* = 268.8 Hz), 125.1 (q, *J* = 32.4 Hz), 120.7, 117.0.

**<sup>19</sup>F NMR** (235 MHz, acetone-*d*<sub>6</sub>) δ -62.3.

**HRMS (-ESI)**: calcd for C<sub>13</sub>H<sub>8</sub>N<sub>2</sub>O<sub>2</sub>F<sub>3</sub> [M-H]<sup>-</sup> 281.0543, found 281.0532.

mp: 131-132 °C.

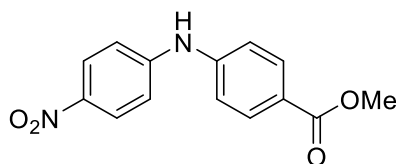

#### methyl 4-((4-nitrophenyl)amino)benzoate

Prepared according to general procedure **A** by using 4-nitroaniline and methyl 4-bromobenzoate to yield the titled compound as yellow solid (0.95 g, 70%).

**<sup>1</sup>H NMR** (400 MHz, acetone-*d*<sub>6</sub>) δ 8.86 (s, 1H), 8.21 (d, *J* = 9.2 Hz, 2H), 8.02 (d, *J* = 8.7 Hz, 2H), 7.40 (d, *J* = 8.7 Hz, 2H), 7.36 (d, *J* = 9.2 Hz, 2H), 3.89 (s, 3H).

**<sup>13</sup>C NMR** (100 MHz, acetone-*d*<sub>6</sub>) δ 167.5, 150.5, 147.0, 142.1, 132.7, 127.4, 125.4, 119.7, 117.3, 52.9.

**HRMS (-ESI)**: calcd for C<sub>14</sub>H<sub>11</sub>N<sub>2</sub>O<sub>4</sub> [M-H]<sup>-</sup> 271.0724, found 271.0714.

mp: 137-139 °C.

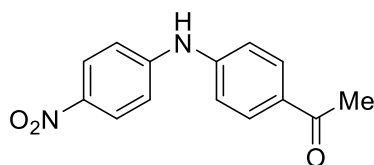

#### 1-(4-((4-nitrophenyl)amino)phenyl)ethan-1-one



Prepared according to general procedure **A** by using 4-nitroaniline and 1-(4-iodophenyl)ethan-1-one to yield the titled compound as orange solid (0.77 g, 60%).

**<sup>1</sup>H NMR** (400 MHz, acetone-*d*<sub>6</sub>) δ 8.87 (s, 1H), 8.22 (d, *J* = 9.2 Hz, 2H), 8.03 (d, *J* = 8.8 Hz, 2H), 7.41 (d, *J* = 8.8 Hz, 2H), 7.38 (d, *J* = 9.2 Hz, 2H), 2.58 (s, 3H).

**<sup>13</sup>C NMR** (100 MHz, acetone-*d*<sub>6</sub>) δ 197.0, 150.5, 147.0, 142.1, 133.1, 131.8, 127.4, 119.7, 117.4, 27.2.

**HRMS (-ESI)**: calcd for C<sub>14</sub>H<sub>11</sub>N<sub>2</sub>O<sub>3</sub> [M-H]<sup>-</sup> 255.0775, found 255.0763

**mp**: 142-143 °C.

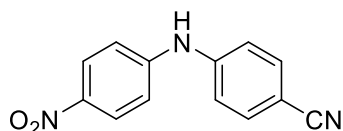

**4-((4-nitrophenyl)amino)benzonitrile**

Prepared according to general procedure **A** by using 4-nitroaniline and 4-bromobenzonitrile to yield the titled compound as yellow solid (0.69g, 58%).

**<sup>1</sup>H NMR** (400 MHz, acetone-*d*<sub>6</sub>) δ 8.96 (s, 1H), 8.24 (d, *J* = 9.2 Hz, 2H), 7.76 (d, *J* = 8.7 Hz, 2H), 7.47 (d, *J* = 8.4 Hz, 2H), 7.41 (d, *J* = 9.3 Hz, 2H).

**<sup>13</sup>C NMR** (100 MHz, acetone-*d*<sub>6</sub>) δ 149.9, 147.1, 142.7, 135.3, 127.3, 120.4, 120.1, 118.0, 106.1.

**HRMS (+APCI)**: calcd for C<sub>13</sub>H<sub>10</sub>N<sub>3</sub>O<sub>2</sub> [M+H]<sup>+</sup> 240.0768, found 240.0768.

**mp**: 207-209 °C.

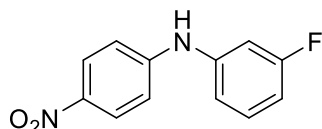

**3-fluoro-N-(4-nitrophenyl)aniline**

Prepared according to general procedure **A** by using 4-nitroaniline and 1-fluoro-3-iodobenzene to yield the titled compound as yellow solid (1.10g, 95%).

**<sup>1</sup>H NMR** (400 MHz, acetone-*d*<sub>6</sub>) δ 8.61 (s, 1H), 8.18 (d, *J* = 9.3 Hz, 2H), 7.48 – 7.39 (m, 1H), 7.26 (d, *J* = 9.3 Hz, 2H), 7.16 (d, *J* = 8.1 Hz, 1H), 7.09 (d, *J* = 10.9 Hz, 1H), 6.88 (td, *J* = 8.4, 2.6 Hz, 1H).

**<sup>13</sup>C NMR** (100 MHz, acetone-*d*<sub>6</sub>) δ 165.1 (d, *J* = 242.0 Hz), 151.5, 144.3 (d, *J* = 11.0 Hz), 141.5, 132.7 (d, *J* = 10.0 Hz), 127.5, 117.7 (d, *J* = 3.0 Hz), 116.1, 111.2 (d, *J* = 22.0 Hz), 108.6 (d, *J* = 25.0 Hz),

**<sup>19</sup>F NMR** (235 MHz, acetone-*d*<sub>6</sub>) δ -113.2.

**HRMS (+ESI)**: calcd for C<sub>12</sub>H<sub>9</sub>N<sub>2</sub>O<sub>2</sub>FNa [M+Na]<sup>+</sup> 255.0540, found 255.0544.

**mp**: 113-114 °C.

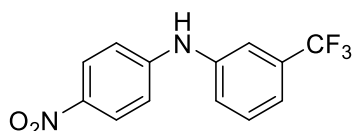

**N-(4-nitrophenyl)-3-(trifluoromethyl)aniline**

Prepared according to general procedure **A** by using 4-nitroaniline and 1-iodo-3-(trifluoromethyl)benzene to yield the titled compound as yellow solid (0.73 g, 52%).

**<sup>1</sup>H NMR** (400 MHz, acetone-*d*<sub>6</sub>) δ 8.81 (s, 1H), 8.18 (d, *J* = 9.2 Hz, 2H), 7.66 – 7.61 (m, 2H), 7.59 (s, 1H), 7.47 – 7.40 (m, 1H), 7.27 (d, *J* = 9.2 Hz, 2H).

**<sup>13</sup>C NMR** (100 MHz, acetone-*d*<sub>6</sub>) δ 151.4, 143.3, 141.7, 132.9 (q, *J* = 32.0 Hz), 132.2, 127.5, 125.9 (q, *J* = 270.0 Hz), 125.1, 121.0 (q, *J* = 3.0 Hz), 118.2 (q, *J* = 4.0 Hz), 116.2.

**<sup>19</sup>F NMR** (235 MHz, acetone-*d*<sub>6</sub>) δ -63.3.

**HRMS (+ESI):** calcd for  $C_{13}H_9N_2O_2F_3Na$   $[M+Na]^+$  305.0508, found 305.0512.  
**mp:** 129-130 °C.

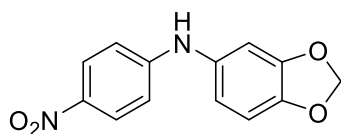

**N-(4-nitrophenyl)benzo[d][1,3]dioxol-5-amine**

Prepared according to general procedure **A** by using benzo[d][1,3]dioxol-5-amine and 1-iodo-4-nitrobenzene to yield the titled compound as yellow solid (0.57g, 44%).

**$^1H$  NMR** (400 MHz, acetone- $d_6$ )  $\delta$  8.30 (s, 1H), 8.11 (d,  $J$  = 9.2 Hz, 2H), 7.01 (d,  $J$  = 9.3 Hz, 2H), 6.91 (d,  $J$  = 8.2 Hz, 1H), 6.87 (d,  $J$  = 2.1 Hz, 1H), 6.80 (dd,  $J$  = 8.2, 2.2 Hz, 1H), 6.07 (s, 2H).

**$^{13}C$  NMR** (100 MHz, acetone- $d_6$ )  $\delta$  153.7, 150.1, 146.4, 140.2, 135.9, 127.6, 117.6, 114.4, 110.1, 106.2, 103.2.

**HRMS (+ESI):** calcd for  $C_{13}H_{10}N_2O_4Na$   $[M+Na]^+$  281.0533, found 281.0538.  
**mp:** 125-127 °C.

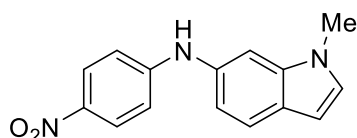

**1-methyl-N-(4-nitrophenyl)-1H-indol-6-amine**

Prepared according to general procedure **A** by using 4-nitroaniline and 6-bromo-1-methyl-1H-indole to yield the titled compound as yellow solid (0.23 g, 17%).

**$^1H$  NMR** (400 MHz, acetone- $d_6$ )  $\delta$  8.45 (s, 1H), 8.11 (d,  $J$  = 9.3 Hz, 2H), 7.62 (d,  $J$  = 8.3 Hz, 1H), 7.38 (s, 1H), 7.26 (d,  $J$  = 3.1 Hz, 1H), 7.10 (d,  $J$  = 9.3 Hz, 2H), 7.03 (d,  $J$  = 8.4 Hz, 1H), 6.48 (d,  $J$  = 3.0 Hz, 1H), 3.85 (s, 3H).

**$^{13}C$  NMR** (100 MHz, acetone- $d_6$ )  $\delta$  154.3, 139.9, 139.0, 135.8, 131.3, 127.9, 127.6, 123.0, 117.3, 114.3, 105.5, 102.4, 33.7.

**HRMS (+ESI):** calcd for  $C_{15}H_{13}N_3O_2Na$   $[M+Na]^+$  290.0900, found 290.0905.  
**mp:** 178-180 °C.

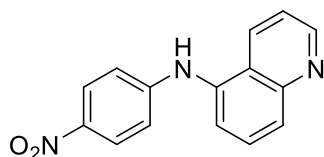

**N-(4-nitrophenyl)quinolin-5-amine**

Prepared according to general procedure **A** by using 4-nitroaniline and 5-bromoquinoline to yield the titled compound as orange solid (0.53 g, 40%).

**$^1H$  NMR** (400 MHz, acetone- $d_6$ )  $\delta$  8.98 (d,  $J$  = 4.0 Hz, 1H), 8.66 (s, 1H), 8.50 (d,  $J$  = 8.6 Hz, 1H), 8.14 (d,  $J$  = 9.3 Hz, 2H), 8.01 (d,  $J$  = 8.6 Hz, 1H), 7.88 – 7.80 (m, 1H), 7.69 (d,  $J$  = 7.5 Hz, 1H), 7.55 (dd,  $J$  = 8.6, 4.0 Hz, 1H), 7.05 (d,  $J$  = 9.2 Hz, 2H).

**$^{13}C$  NMR** (100 MHz, acetone- $d_6$ )  $\delta$  154.3, 152.5, 151.2, 140.9, 138.2, 132.6, 131.0, 128.9, 127.5, 126.2, 123.1, 122.9, 115.3.

**HRMS (+APCI):** calcd for  $C_{15}H_{12}N_3O_2$   $[M+H]^+$  266.0924, found 266.0921.  
**mp:** 189-190 °C.

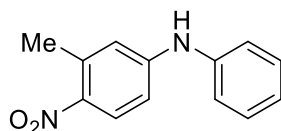

### 3-methyl-4-nitro-N-phenylaniline

Prepared according to general procedure **A** by using 3-methyl-4-nitroaniline and iodobenzene to yield the titled compound as yellow solid (0.77 g, 68%).

**<sup>1</sup>H NMR** (400 MHz, acetone-*d*<sub>6</sub>) δ 8.27 (s, 1H), 8.07 (d, *J* = 8.9 Hz, 1H), 7.42 (t, *J* = 7.9 Hz, 2H), 7.32 (d, *J* = 8.4 Hz, 2H), 7.14 (t, *J* = 7.3 Hz, 1H), 7.06 – 6.97 (m, 2H), 2.60 (s, 3H).

**<sup>13</sup>C NMR** (100 MHz, acetone-*d*<sub>6</sub>) δ 151.2, 142.3, 138.6, 131.1, 129.3, 125.0, 122.6, 122.5, 118.5, 113.6, 22.8.

**HRMS (+APCI)**: calcd for C<sub>13</sub>H<sub>12</sub>N<sub>2</sub>O<sub>2</sub>Na [M+Na]<sup>+</sup> 251.0791, found 251.0794.

**mp**: 123-124 °C.

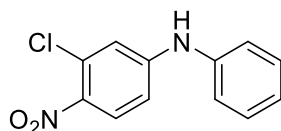

### 3-chloro-4-nitro-N-phenylaniline

Prepared according to general procedure **A** by using 3-chloro-4-nitroaniline and iodobenzene to yield the titled compound as yellow solid (0.61 g, 49%).

**<sup>1</sup>H NMR** (400 MHz, acetone-*d*<sub>6</sub>) δ 8.50 (s, 1H), 8.07 (d, *J* = 9.1 Hz, 1H), 7.50 – 7.42 (m, 2H), 7.35 (d, *J* = 7.2 Hz, 2H), 7.21 (t, *J* = 7.3 Hz, 1H), 7.16 (d, *J* = 2.5 Hz, 1H), 7.10 (dd, *J* = 9.1, 2.5 Hz, 1H).

**<sup>13</sup>C NMR** (100 MHz, acetone-*d*<sub>6</sub>) δ 151.9, 141.5, 139.2, 131.3, 131.0, 130.4, 125.9, 123.4, 117.2, 114.0.

**HRMS (+APCI)**: calcd for C<sub>12</sub>H<sub>10</sub>N<sub>2</sub>O<sub>2</sub>Cl [M+H]<sup>+</sup> 249.0425, found 249.0422.

**mp**: 130-132 °C.

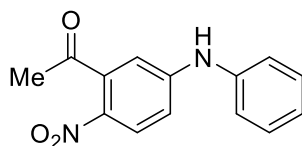

### 1-(2-nitro-5-(phenylamino)phenyl)ethan-1-one

Prepared according to general procedure **A** by using 1-(5-amino-2-nitrophenyl)ethan-1-one and iodobenzene to yield the titled compound as yellow solid (0.79 g, 62%).

**<sup>1</sup>H NMR** (400 MHz, acetone-*d*<sub>6</sub>) δ 8.62 (s, 1H), 8.11 (d, *J* = 9.2 Hz, 1H), 7.48 – 7.42 (m, 2H), 7.38 – 7.33 (m, 2H), 7.24 – 7.15 (m, 2H), 6.95 (d, *J* = 2.6 Hz, 1H), 2.49 (s, 3H).

**<sup>13</sup>C NMR** (100 MHz, acetone-*d*<sub>6</sub>) δ 201.4, 152.7, 143.7, 141.5, 137.0, 131.3, 128.8, 126.0, 123.4, 115.4, 112.4, 31.4.

**HRMS (+APCI)**: calcd for C<sub>14</sub>H<sub>13</sub>N<sub>2</sub>O<sub>3</sub> [M+H]<sup>+</sup> 257.0921, found 257.0911.

**mp**: 127-128 °C.

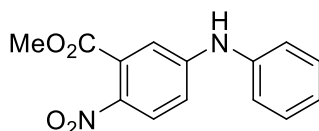

### methyl 2-nitro-5-(phenylamino)benzoate

Prepared according to general procedure **A** by using methyl 5-amino-2-nitrobenzoate and iodobenzene to yield the titled compound as orange oil (1.17 g, 86%).

**<sup>1</sup>H NMR** (400 MHz, acetone-*d*<sub>6</sub>) δ 8.55 (s, 1H), 8.07 (d, *J* = 9.2 Hz, 1H), 7.49 – 7.42 (m, 2H), 7.35 (d, *J* = 7.3 Hz, 2H), 7.25 – 7.18 (m, 2H), 7.14 (d, *J* = 2.6 Hz, 1H), 3.89 (s, 3H).

**<sup>13</sup>C NMR** (100 MHz, acetone-*d*<sub>6</sub>) δ 168.5, 152.1, 141.6, 133.8, 131.3, 128.7, 126.0, 123.4, 116.0, 114.7, 54.0, 31.4.

**HRMS (+APCI)**: calcd for C<sub>14</sub>H<sub>12</sub>N<sub>2</sub>O<sub>4</sub> [M]<sup>+</sup> 272.0792, found 272.0790.

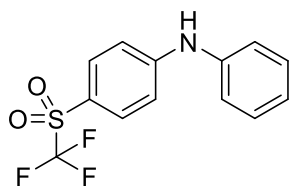

**N-phenyl-4-((trifluoromethyl)sulfonyl)aniline**

Prepared according to general procedure **A** by using methyl 4-((trifluoromethyl)sulfonyl)aniline and iodobenzene to yield the titled compound as white solid (0.39 g, 26%).

**<sup>1</sup>H NMR** (400 MHz, acetone-*d*<sub>6</sub>) δ 8.66 (s, 1H), 7.87 (d, *J* = 9.0 Hz, 2H), 7.51 – 7.43 (m, 2H), 7.40 – 7.34 (m, 2H), 7.30 (d, *J* = 9.0 Hz, 2H), 7.23 (tt, *J* = 7.2, 1.2 Hz, 1H).

**<sup>13</sup>C NMR** (100 MHz, acetone-*d*<sub>6</sub>) δ 154.6, 141.3, 134.7, 131.3, 126.2, 123.8, 121.9 (q, *J* = 323 Hz), 118.2, 115.9.

**<sup>19</sup>F NMR** (235 MHz, acetone-*d*<sub>6</sub>) δ -80.5.

**HRMS (-APCI)**: calcd for C<sub>13</sub>H<sub>9</sub>NO<sub>2</sub>F<sub>3</sub>S [M-H]<sup>-</sup> 300.0312, found 300.0306.

mp: 121-123 °C.

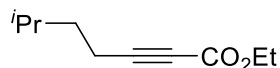

**methyl 2-nitro-5-(phenylamino)benzoate**

Prepared according to general procedure **B** by using 5-methylhex-1-yne to yield the titled compound as colourless oil (0.85 g, 51%).

**<sup>1</sup>H NMR** (400 MHz, acetone-*d*<sub>6</sub>) δ 4.20 (q, *J* = 7.1 Hz, 2H), 2.43 (t, *J* = 7.4 Hz, 2H), 1.79 – 1.69 (m, 1H), 1.54 – 1.47 (m, 2H), 1.29 (t, *J* = 7.1 Hz, 3H), 0.96 (s, 3H), 0.95 (s, 3H).

**<sup>13</sup>C NMR** (100 MHz, acetone-*d*<sub>6</sub>) δ 154.8, 90.3, 74.7, 62.8, 37.9, 28.7, 23.0, 17.6, 15.1.

**HRMS (+ESI)**: calcd for C<sub>10</sub>H<sub>16</sub>O<sub>2</sub>Na [M+Na]<sup>+</sup> 191.1043, found 191.1045.

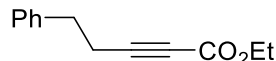

**ethyl 5-phenylpent-2-ynoate**

Prepared according to general procedure **B** by using but-3-yn-1-ylbenzene to yield the titled compound as colourless oil (1.37 g, 68%).

**<sup>1</sup>H NMR** (400 MHz, CDCl<sub>3</sub>) δ 7.34 (dd, *J* = 8.3, 6.4 Hz, 2H), 7.29 – 7.19 (m, 3H), 4.23 (q, *J* = 7.1 Hz, 2H), 2.92 (t, *J* = 7.6 Hz, 2H), 2.63 (t, *J* = 7.6 Hz, 2H), 1.32 (t, *J* = 7.2 Hz, 3H).

**<sup>13</sup>C NMR** (100 MHz, CDCl<sub>3</sub>) δ 153.8, 139.8, 128.7, 128.5, 126.8, 88.4, 73.9, 61.9, 34.0, 21.0, 14.2.

**HRMS (+ESI)**: calcd for C<sub>13</sub>H<sub>14</sub>O<sub>2</sub>Na [M+Na]<sup>+</sup> 225.0886, found 225.0888.

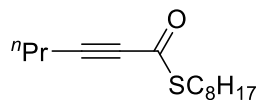

**S-octyl hex-2-ynethioate**

To a solution of hex-2-ynoic acid (4.0 mmol, 1.0 equiv.) and DMAP (0.1 equiv.) in DCM (50 mL) were added EDC·HCl (1.5 equiv.) and octane-1-thiol (1.1 equiv.) at 0 °C. Then the reaction was warmed to room temperature. Upon completion monitored by the TLC, water was added and the phases were separated. Then the aqueous phase was extracted with DCM (x3). The combined organic layers were dried over Na<sub>2</sub>SO<sub>4</sub>, filtered and concentrated under reduced pressure. The residue was purified by column chromatography on silica gel to give the titled compound as colourless oil (0.46 g, 48%).

**<sup>1</sup>H NMR** (500 MHz, acetone-*d*<sub>6</sub>) δ 3.00 (t, *J* = 7.3 Hz, 2H), 2.47 (t, *J* = 7.0 Hz, 2H), 1.68 – 1.58 (m, 4H), 1.46 – 1.38 (m, 2H), 1.37 – 1.28 (m, 8H), 1.04 (t, *J* = 7.4 Hz, 3H), 0.91 (t, *J* = 6.8 Hz, 3H).

**<sup>13</sup>C NMR** (125 MHz, acetone-*d*<sub>6</sub>) δ 177.1, 96.3, 80.2, 33.2, 30.8, 30.57, 30.10, 24.0, 22.5, 21.7, 15.1, 14.3.

**HRMS (+ESI)**: calcd for C<sub>14</sub>H<sub>24</sub>OSNa [M+Na]<sup>+</sup> 263.1440, found 263.1443.

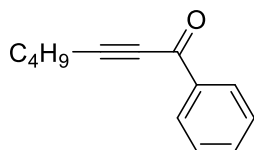

**1-phenylhept-2-yn-1-one**

To an oven-dried microwave vial were added PdCl<sub>2</sub>(PPh<sub>3</sub>)<sub>2</sub> (0.5 mol%) and CuI (2.5 mol%). The vial was sealed by a cap and placed on the Schlenk line to evacuate and backfill with N<sub>2</sub> three times. Then Et<sub>3</sub>N (10 mL), benzoyl chloride (5 mmol, 1.0 equiv.) and hex-1-yne (1.25 equiv.) were added. The mixture was stirred at room temperature. After 24 h, Et<sub>2</sub>O was added and the reaction was quenched with 3 M HCl. Then the organic layer was washed with water and brine, dried over Na<sub>2</sub>SO<sub>4</sub> and concentrated under reduced pressure. The mixture was purified by column chromatography on silica gel to afford the titled compound as light brown oil (0.76 g, 82%).

**<sup>1</sup>H NMR** (400 MHz, acetone-*d*<sub>6</sub>) δ 8.17 (d, *J* = 7.1 Hz, 2H), 7.73 (t, *J* = 7.3 Hz, 1H), 7.60 (t, *J* = 7.6 Hz, 2H), 2.62 (t, *J* = 7.1 Hz, 2H), 1.71 (p, *J* = 7.0 Hz, 2H), 1.56 (h, *J* = 7.3 Hz, 2H), 1.00 (t, *J* = 7.3 Hz, 3H).

**<sup>13</sup>C NMR** (100 MHz, acetone-*d*<sub>6</sub>) δ 178.8, 138.7, 135.6, 130.7, 130.4, 98.0, 80.9, 31.4, 23.5, 19.8, 14.5.

**HRMS (+ESI)**: calcd for C<sub>13</sub>H<sub>14</sub>ONa [M+Na]<sup>+</sup> 209.0937, found 209.0940.

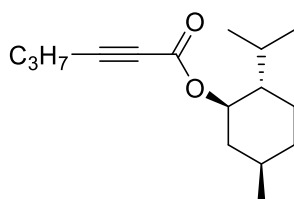

**(1R,2S,5R)-2-isopropyl-5-methylcyclohexyl hex-2-ynoate**

To a solution of hex-2-ynoic acid (4.0 mmol, 1.0 equiv.) and DMAP (0.2 equiv.) in DCM (50 mL) were added EDC·HCl (1.2 equiv.) and L-Menthol (1.1 equiv.) at 0 °C. Then the reaction was warmed to room temperature. Upon completion monitored by the TLC, water was added and the phases were separated. Then the aqueous phase was extracted with DCM (x3). The combined organic layers were dried over Na<sub>2</sub>SO<sub>4</sub>, filtered and concentrated under reduced pressure. The residue was purified by column chromatography on silica gel to give the titled compound as colourless oil (0.93 g, 93%).

**<sup>1</sup>H NMR** (400 MHz, acetone-*d*<sub>6</sub>) δ 4.78 (td, *J* = 10.9, 4.4 Hz, 1H), 2.40 (t, *J* = 7.1 Hz, 2H), 2.00 (dtd, *J* = 11.9, 4.1, 1.8 Hz, 1H), 1.92 (pd, *J* = 7.0, 2.7 Hz, 1H), 1.78 – 1.70 (m, 2H), 1.63 (h, *J* = 7.3 Hz, 2H), 1.58 – 1.50 (m, 1H), 1.46 (ddt, *J* = 12.6, 10.8, 3.1 Hz, 1H), 1.21 – 0.87 (m, 12H), 0.81 (d, *J* = 7.0 Hz, 3H).

**<sup>13</sup>C NMR** (100 MHz, acetone-*d*<sub>6</sub>) δ 154.5, 90.2, 76.9, 75.0, 48.5, 42.2, 35.6, 32.9, 27.8, 24.9, 23.0, 22.6, 21.7, 21.4, 17.4, 14.4.

**HRMS (+ESI)**: calcd for C<sub>16</sub>H<sub>26</sub>O<sub>2</sub>Na [M+Na]<sup>+</sup> 273.1825, found 273.1828.

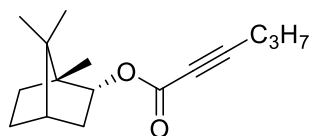

**(1R,2R,4R)-1,7,7-trimethylbicyclo[2.2.1]heptan-2-yl hex-2-ynoate**

To a solution of hex-2-ynoic acid (4.0 mmol, 1.0 equiv.) and DMAP (0.2 equiv.) in DCM (50 mL)

were added EDC·HCl (1.2 equiv.) and (-)-Borneol (1.1 equiv.) at 0 °C. Then the reaction was warmed to room temperature. Upon completion monitored by the TLC, water was added and the phases were separated. Then the aqueous phase was extracted with DCM (x3). The combined organic layers were dried over Na<sub>2</sub>SO<sub>4</sub>, filtered and concentrated under reduced pressure. The residue was purified by column chromatography on silica gel to give the titled compound as colourless oil (0.87 g, 87%).

**<sup>1</sup>H NMR** (400 MHz, acetone-*d*<sub>6</sub>) δ 4.97 (ddd, *J* = 10.0, 3.6, 2.2 Hz, 1H), 2.45 – 2.35 (m, 3H), 1.98 (ddd, *J* = 12.7, 9.4, 4.5 Hz, 1H), 1.82 (ttt, *J* = 12.2, 4.4, 3.2 Hz, 1H), 1.74 (t, *J* = 4.5 Hz, 1H), 1.64 (h, *J* = 7.3 Hz, 2H), 1.39 (dddd, *J* = 12.7, 11.8, 4.5, 2.2 Hz, 1H), 1.29 (ddd, *J* = 12.1, 9.4, 4.4 Hz, 1H), 1.09 – 1.02 (m, 4H), 0.97 (s, 3H), 0.94 (s, 3H), 0.89 (s, 3H).

**<sup>13</sup>C NMR** (100 MHz, acetone-*d*<sub>6</sub>) δ 155.2, 90.2, 82.7, 75.1, 50.3, 49.3, 46.4, 38.0, 29.3, 28.5, 22.6, 21.5, 20.7, 19.8, 14.5, 14.4.

**HRMS (+ESI)**: calcd for C<sub>16</sub>H<sub>24</sub>O<sub>2</sub>Na [M+Na]<sup>+</sup> 271.1669, found 271.1672.

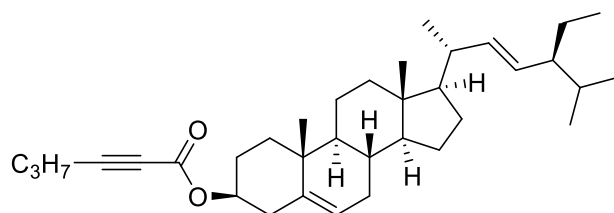

**(3S,8S,9S,10R,13R,14S,17R)-17-((2R,5S,E)-5-ethyl-6-methylhept-3-en-2-yl)-10,13-dimethyl-2,3,4,7,8,9,10,11,12,13,14,15,16,17-tetradecahydro-1H-cyclopenta[a]phenanthren-3-yl hex-2-ynoate**

To a solution of hex-2-ynoic acid (4.0 mmol, 1.0 equiv.) and DMAP (0.2 equiv.) in DCM (50 mL) were added EDC·HCl (1.2 equiv.) and Stigmasterol (1.1 equiv.) at 0 °C. Then the reaction was warmed to room temperature. Upon completion monitored by the TLC, water was added and the phases were separated. Then the aqueous phase was extracted with DCM (x3). The combined organic layers were dried over Na<sub>2</sub>SO<sub>4</sub>, filtered and concentrated under reduced pressure. The residue was purified by column chromatography on silica gel to give the titled compound as white solid (1.32 g, 65%).

**<sup>1</sup>H NMR** (400 MHz, CD<sub>2</sub>Cl<sub>2</sub>) δ 5.39 (d, *J* = 5.1 Hz, 1H), 5.18 (dd, *J* = 15.2, 8.5 Hz, 1H), 5.04 (dd, *J* = 15.1, 8.6 Hz, 1H), 4.68 – 4.55 (m, 1H), 2.40 – 2.25 (m, 4H), 2.12 – 1.93 (m, 3H), 1.93 – 1.82 (m, 2H), 1.76 – 1.39 (m, 12H), 1.34 – 0.91 (m, 17H), 0.89 – 0.76 (m, 9H), 0.71 (s, 3H).

**<sup>13</sup>C NMR** (100 MHz, CD<sub>2</sub>Cl<sub>2</sub>) δ 153.5, 139.9, 138.8, 129.7, 123.2, 89.2, 76.1, 73.8, 57.2, 56.4, 51.7, 50.5, 42.6, 40.9, 40.1, 38.3, 37.4, 37.0, 32.33, 32.30, 32.26, 29.3, 28.0, 25.8, 24.7, 21.6, 21.4, 21.2, 20.9, 19.5, 19.2, 13.6, 12.4, 12.2.

**HRMS (+ESI)**: calcd for C<sub>35</sub>H<sub>54</sub>O<sub>2</sub>Na [M+Na]<sup>+</sup> 529.4016, found 529.4016

**mp**: 135-136 °C.

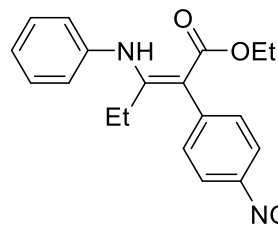

**ethyl (Z)-2-(4-nitrophenyl)-3-(phenylamino)pent-2-enoate**

Prepared according to general procedure **C** by using 4-nitro-N-phenylaniline (1.2 equiv.), ethyl pent-2-ynoate (0.2 mmol) and Cs<sub>2</sub>CO<sub>3</sub> (1.5 equiv.) to yield the titled compound as yellow solid (49.5 mg, 73%).

**<sup>1</sup>H NMR** (400 MHz, acetone-*d*<sub>6</sub>) δ 11.34 (s, 1H), 8.25 (d, *J* = 8.8 Hz, 2H), 7.58 (d, *J* = 8.8 Hz, 2H), 7.52 – 7.42 (m, 2H), 7.38 – 7.27 (m, 3H), 4.11 (q, *J* = 7.1 Hz, 2H), 2.35 (q, *J* = 7.5 Hz, 2H), 1.13 (t, *J* = 7.1 Hz, 3H), 0.78 (t, *J* = 7.5 Hz, 3H).

**<sup>13</sup>C NMR** (100 MHz, acetone-*d*<sub>6</sub>) δ 170.7, 165.1, 148.1, 147.7, 140.9, 135.0, 131.0, 127.5,

127.3, 124.5, 99.3, 60.8, 23.8, 15.4, 13.3.

**HRMS (-ESI):** calcd for  $C_{19}H_{19}N_2O_4$   $[M-H]^-$  339.1364, found 339.1366.

**mp:** 104-105 °C.

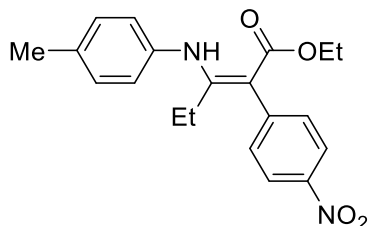

**ethyl (Z)-2-(4-nitrophenyl)-3-(p-tolylamino)pent-2-enoate**

Prepared according to general procedure **C** by using 4-methyl-N-(4-nitrophenyl)aniline (1.2 equiv.), ethyl pent-2-ynoate (0.2 mmol) and  $Cs_2CO_3$  (1.5 equiv.) to yield the titled compound as yellow solid (18.2 mg, 26%).

**$^1H$  NMR** (400 MHz, acetone- $d_6$ )  $\delta$  11.08 (s, 1H), 8.07 (d,  $J$  = 11.4 Hz, 2H), 7.40 (d,  $J$  = 8.8 Hz, 2H), 7.11 (d,  $J$  = 8.2 Hz, 2H), 7.04 (d,  $J$  = 8.4 Hz, 2H), 3.93 (q,  $J$  = 7.1 Hz, 2H), 2.21 (s, 3H), 2.13 (q,  $J$  = 7.5 Hz, 2H), 0.96 (t,  $J$  = 7.1 Hz, 3H), 0.60 (t,  $J$  = 7.5 Hz, 3H).

**$^{13}C$  NMR** (100 MHz, acetone- $d_6$ )  $\delta$  170.7, 165.6, 148.0, 147.9, 138.2, 137.4, 135.0, 131.5, 127.5, 124.4, 98.7, 60.7, 23.8, 21.7, 15.5, 13.3.

**HRMS (-ESI):** calcd for  $C_{20}H_{21}N_2O_4$   $[M-H]^-$  353.1516, found 353.1519.

**mp:** 123-125 °C.

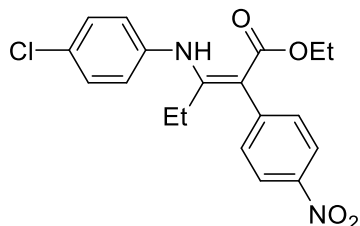

**ethyl (Z)-3-((4-chlorophenyl)amino)-2-(4-nitrophenyl)pent-2-enoate**

Prepared according to general procedure **C** by using 4-chloro-N-(4-nitrophenyl)aniline (1.2 equiv.), ethyl pent-2-ynoate (0.3 mmol) and KOH (1.5 equiv.) to yield the titled compound as yellow solid (48.2 mg, 43%).

**$^1H$  NMR** (400 MHz, acetone- $d_6$ )  $\delta$  11.27 (s, 1H), 8.25 (d,  $J$  = 8.6 Hz, 2H), 7.58 (d,  $J$  = 8.6 Hz, 2H), 7.49 (d,  $J$  = 8.7 Hz, 2H), 7.36 (d,  $J$  = 8.8 Hz, 2H), 4.11 (q,  $J$  = 7.0 Hz, 2H), 2.34 (q,  $J$  = 7.5 Hz, 2H), 1.13 (t,  $J$  = 7.1 Hz, 3H), 0.79 (t,  $J$  = 7.5 Hz, 3H).

**$^{13}C$  NMR** (100 MHz, acetone- $d_6$ )  $\delta$  170.7, 164.6, 148.2, 147.5, 140.0, 134.9, 132.3, 131.0, 128.8, 124.5, 100.2, 60.9, 23.8, 15.4, 13.3.

**HRMS (+ESI):** calcd for  $C_{19}H_{19}N_2O_4ClNa$   $[M+Na]^+$  397.0926, found 397.0923.

**mp:** 88-89 °C.

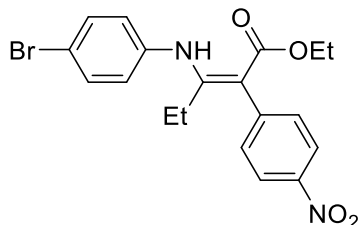

**ethyl (Z)-3-((4-bromophenyl)amino)-2-(4-nitrophenyl)pent-2-enoate**

Prepared according to general procedure **C** by using 4-bromo-N-(4-nitrophenyl)aniline (1.2 equiv.), ethyl pent-2-ynoate (0.3 mmol) and KOH (1.5 equiv.) to yield the titled compound as yellow solid (56.3 mg, 45%).

**<sup>1</sup>H NMR** (400 MHz, acetone-*d*<sub>6</sub>) δ 11.27 (s, 1H), 8.25 (d, *J* = 7.0 Hz, 2H), 7.63 (d, *J* = 8.6 Hz, 2H), 7.57 (d, *J* = 8.9 Hz, 2H), 7.30 (d, *J* = 8.6 Hz, 2H), 4.11 (q, *J* = 7.0 Hz, 2H), 2.35 (q, *J* = 7.6 Hz, 2H), 1.13 (t, *J* = 7.0 Hz, 3H), 0.80 (t, *J* = 7.5 Hz, 3H).

**<sup>13</sup>C NMR** (100 MHz, acetone-*d*<sub>6</sub>) δ 170.7, 164.5, 148.2, 147.4, 140.5, 134.9, 134.0, 129.0, 124.5, 120.0, 100.3, 60.9, 23.8, 15.4, 13.3.

**HRMS (-ESI)**: calcd for C<sub>19</sub>H<sub>18</sub>N<sub>2</sub>O<sub>4</sub>Br [M-H]<sup>-</sup> 417.0455, found 417.0440.

mp: 94-96 °C.

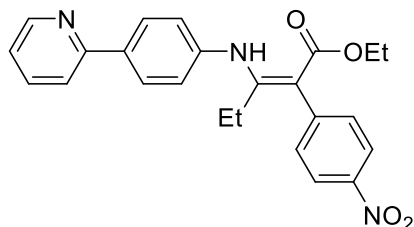

**ethyl (Z)-2-(4-nitrophenyl)-3-((4-(pyridin-2-yl)phenyl)amino)pent-2-enoate**

Prepared according to general procedure **C** by using ethyl (Z)-2-(4-nitrophenyl)-3-((4-(pyridin-2-yl)phenyl)amino)pent-2-enoate (1.2 equiv.), ethyl pent-2-ynoate (0.3 mmol) and KOH (1.5 equiv.) to yield the titled compound as yellow solid (45.0 mg, 36%).

**<sup>1</sup>H NMR** (400 MHz, acetone-*d*<sub>6</sub>) δ 11.44 (s, 1H), 8.71 (ddd, *J* = 4.8, 1.9, 0.9 Hz, 1H), 8.26 (d, *J* = 8.9 Hz, 2H), 8.23 (d, *J* = 8.7 Hz, 2H), 7.99 (d, *J* = 8.1 Hz, 1H), 7.90 (td, *J* = 7.7, 1.9 Hz, 1H), 7.60 (d, *J* = 8.8 Hz, 2H), 7.43 (d, *J* = 8.4 Hz, 2H), 7.35 (dd, *J* = 7.4, 4.8 Hz, 1H), 4.13 (q, *J* = 7.1 Hz, 2H), 2.44 (q, *J* = 7.5 Hz, 2H), 1.14 (t, *J* = 7.1 Hz, 3H), 0.84 (t, *J* = 7.5 Hz, 3H).

**<sup>13</sup>C NMR** (100 MHz, acetone-*d*<sub>6</sub>) δ 170.8, 164.7, 157.6, 151.3, 148.2, 147.6, 141.8, 138.6, 138.0, 135.0, 129.3, 126.7, 124.5, 123.9, 121.4, 100.2, 60.9, 24.0, 15.4, 13.3.

**HRMS (+ESI)**: calcd for C<sub>24</sub>H<sub>24</sub>N<sub>3</sub>O<sub>4</sub> [M+H]<sup>+</sup> 418.1767, found 418.1768.

mp: 121-122 °C.

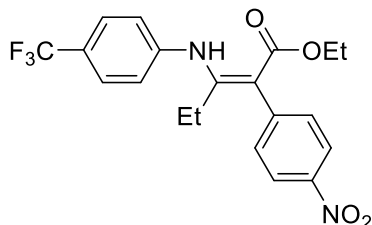

**ethyl (Z)-2-(4-nitrophenyl)-3-((4-(trifluoromethyl)phenyl)amino)pent-2-enoate**

Prepared according to general procedure **C** by using 4-nitro-N-(4-(trifluoromethyl)phenyl)aniline (1.2 equiv.), ethyl pent-2-ynoate (0.3 mmol) and Cs<sub>2</sub>CO<sub>3</sub> (1.5 equiv.) to yield the titled compound as yellow solid (85.6 mg, 70%).

**<sup>1</sup>H NMR** (400 MHz, acetone-*d*<sub>6</sub>) δ 11.47 (s, 1H), 8.27 (d, *J* = 8.8 Hz, 2H), 7.79 (d, *J* = 8.3 Hz, 2H), 7.60 (d, *J* = 8.8 Hz, 2H), 7.52 (d, *J* = 9.0 Hz, 2H), 4.13 (q, *J* = 7.2 Hz, 2H), 2.46 (q, *J* = 7.5 Hz, 2H), 1.13 (t, *J* = 7.1 Hz, 3H), 0.84 (t, *J* = 7.5 Hz, 3H).

**<sup>13</sup>C NMR** (100 MHz, acetone-*d*<sub>6</sub>) δ 170.7, 163.5, 148.3, 147.1, 145.0, 134.8, 128.1 (q, *J* = 3.8 Hz), 126.09 (q, *J* = 263.0 Hz), 126.05, 124.6, 102.0, 61.2, 24.0, 15.3, 13.3.

**<sup>19</sup>F NMR** (235 MHz, acetone-*d*<sub>6</sub>) δ -62.6.

**HRMS (-ESI)**: calcd for C<sub>20</sub>H<sub>18</sub>N<sub>2</sub>O<sub>4</sub>F<sub>3</sub> [M-H]<sup>-</sup> 407.1221, found 407.1288.

mp: 93-94 °C.



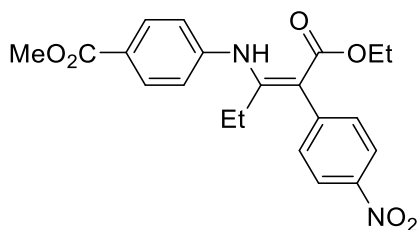

**methyl (Z)-4-((1-ethoxy-2-(4-nitrophenyl)-1-oxopent-2-en-3-yl)amino)benzoate**

Prepared according to general procedure **C** by using methyl 4-((4-nitrophenyl)amino)benzoate (1.2 equiv.), ethyl pent-2-ynoate (0.3 mmol) and  $\text{Cs}_2\text{CO}_3$  (1.5 equiv.) to yield the titled compound as yellow solid (76.4 mg, 64%).

**$^1\text{H}$  NMR** (400 MHz, acetone- $d_6$ )  $\delta$  11.51 (s, 1H), 8.27 (d,  $J$  = 8.8 Hz, 2H), 8.07 (d,  $J$  = 8.6 Hz, 2H), 7.60 (d,  $J$  = 8.8 Hz, 2H), 7.41 (d,  $J$  = 8.4 Hz, 2H), 4.12 (q,  $J$  = 7.0 Hz, 2H), 3.92 (s, 3H), 2.48 (q,  $J$  = 7.5 Hz, 2H), 1.13 (t,  $J$  = 7.1 Hz, 3H), 0.85 (t,  $J$  = 7.5 Hz, 3H).

**$^{13}\text{C}$  NMR** (100 MHz, acetone- $d_6$ )  $\delta$  170.7, 167.4, 163.4, 148.3, 147.2, 145.7, 134.8, 132.4, 127.9, 125.0, 124.5, 102.1, 61.2, 53.1, 24.1, 15.3, 13.2.

**HRMS (+ESI)**: calcd for  $\text{C}_{21}\text{H}_{22}\text{N}_2\text{O}_6\text{Na}$   $[\text{M}+\text{Na}]^+$  421.1383, found 421.1385.

**mp**: 102-104 °C.

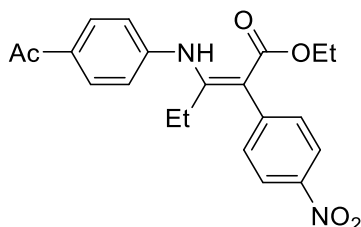

**ethyl (Z)-3-((4-acetylphenyl)amino)-2-(4-nitrophenyl)pent-2-enoate**

Prepared according to general procedure **C** by using methyl 1-(4-((4-nitrophenyl)amino)phenyl)ethan-1-one (1.2 equiv.), ethyl pent-2-ynoate (0.3 mmol) and  $\text{Cs}_2\text{CO}_3$  (1.5 equiv.) to yield the titled compound as yellow solid (73.3 mg, 64%).

**$^1\text{H}$  NMR** (400 MHz, acetone- $d_6$ )  $\delta$  11.52 (s, 1H), 8.27 (d,  $J$  = 8.8 Hz, 2H), 8.07 (d,  $J$  = 8.7 Hz, 2H), 7.60 (d,  $J$  = 8.8 Hz, 2H), 7.40 (d,  $J$  = 8.7 Hz, 2H), 4.13 (q,  $J$  = 7.0 Hz, 2H), 2.61 (s, 3H), 2.49 (q,  $J$  = 7.5 Hz, 2H), 1.13 (t,  $J$  = 7.0 Hz, 3H), 0.85 (t,  $J$  = 7.5 Hz, 3H).

**$^{13}\text{C}$  NMR** (100 MHz, acetone- $d_6$ )  $\delta$  197.4, 170.7, 163.4, 148.3, 147.1, 145.5, 135.2, 134.8, 131.4, 124.9, 124.5, 102.1, 61.2, 27.3, 24.1, 15.4, 13.3.

**HRMS (+ESI)**: calcd for  $\text{C}_{21}\text{H}_{22}\text{N}_2\text{O}_5\text{Na}$   $[\text{M}+\text{Na}]^+$  405.1432, found 405.1435.

**mp**: 103-104 °C.

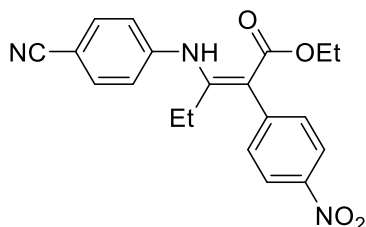

**ethyl (Z)-3-((4-cyanophenyl)amino)-2-(4-nitrophenyl)pent-2-enoate**

Prepared according to general procedure **C** by using 4-((4-nitrophenyl)amino)benzonitrile (1.2 equiv.), ethyl pent-2-ynoate (0.3 mmol) and  $\text{Cs}_2\text{CO}_3$  (1.5 equiv.) to yield the titled compound as yellow gum (77.7 mg, 71%).

**$^1\text{H}$  NMR** (400 MHz, acetone- $d_6$ )  $\delta$  11.50 (s, 1H), 8.27 (d,  $J$  = 8.9 Hz, 2H), 7.83 (d,  $J$  = 8.7 Hz, 2H), 7.60 (d,  $J$  = 8.9 Hz, 2H), 7.48 (d,  $J$  = 8.6 Hz, 2H), 4.13 (q,  $J$  = 7.0 Hz, 2H), 2.49 (q,  $J$  = 7.5 Hz, 2H), 1.13 (t,  $J$  = 7.1 Hz, 3H), 0.86 (t,  $J$  = 7.5 Hz, 3H).

**$^{13}\text{C}$  NMR** (100 MHz, acetone- $d_6$ )  $\delta$  170.6, 162.7, 148.3, 146.9, 145.7, 135.1, 134.7, 125.3,

124.6, 120.0, 108.9, 103.4, 61.3, 24.1, 15.3, 13.2.

**HRMS (-ESI):** calcd for  $C_{20}H_{18}N_3O_4$   $[M-H]^-$  364.1305, found 364.1397.

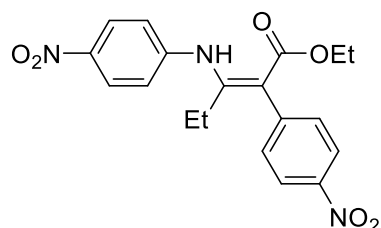

**ethyl (Z)-2-(4-nitrophenyl)-3-((4-nitrophenyl)amino)pent-2-enoate**

Prepared according to general procedure **C** by using bis(4-nitrophenyl)amine (1.2 equiv.), ethyl pent-2-ynoate (0.2 mmol) and  $Cs_2CO_3$  (1.5 equiv.) to yield the titled compound as yellow solid (66.6 mg, 87%).

**$^1H$  NMR** (400 MHz,  $CDCl_3$ )  $\delta$  11.58 (s, 1H), 8.24 – 8.21 (m, 4H), 7.39 (d,  $J$  = 7.1 Hz, 2H), 7.22 (d,  $J$  = 9.0 Hz, 2H), 4.11 (q,  $J$  = 7.1 Hz, 2H), 2.38 (q,  $J$  = 7.5 Hz, 2H), 1.13 (t,  $J$  = 7.1 Hz, 3H), 0.86 (t,  $J$  = 7.5 Hz, 3H).

**$^{13}C$  NMR** (100 MHz,  $CDCl_3$ )  $\delta$  169.7, 160.6, 147.1, 146.0, 144.9, 144.0, 132.9, 125.6, 123.6, 122.8, 102.8, 60.7, 23.01, 14.6, 12.7.

**HRMS (+ESI):** calcd for  $C_{19}H_{19}N_3O_6Na$   $[M+Na]^+$  408.1166, found 408.1171.

**mp:** 77-79 °C

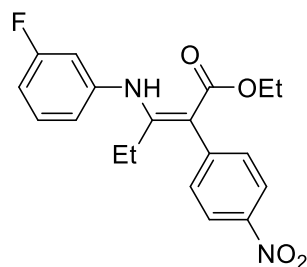

**ethyl (Z)-3-((3-fluorophenyl)amino)-2-(4-nitrophenyl)pent-2-enoate**

Prepared according to general procedure **C** by using 3-fluoro-N-(4-nitrophenyl)aniline (1.2 equiv.), ethyl pent-2-ynoate (0.3 mmol) and  $Cs_2CO_3$  (1.5 equiv.) to yield the titled compound as yellow solid (62.3 mg, 58%).

**$^1H$  NMR** (400 MHz, acetone- $d_6$ )  $\delta$  11.34 (s, 1H), 8.26 (d,  $J$  = 8.8 Hz, 2H), 7.58 (d,  $J$  = 8.9 Hz, 2H), 7.54 – 7.42 (m, 1H), 7.15 (t,  $J$  = 8.7 Hz, 2H), 7.06 (t,  $J$  = 8.5 Hz, 1H), 4.11 (q,  $J$  = 7.1 Hz, 2H), 2.40 (q,  $J$  = 7.5 Hz, 2H), 1.13 (t,  $J$  = 7.1 Hz, 3H), 0.82 (t,  $J$  = 7.5 Hz, 3H).

**$^{13}C$  NMR** (100 MHz, acetone- $d_6$ )  $\delta$  170.7, 165.9, 164.3, 163.5, 148.2, 147.4, 143.0 (d,  $J$  = 10 Hz), 134.9, 132.4 (d,  $J$  = 9 Hz), 124.4, 122.7 (d,  $J$  = 3 Hz), 113.7 (d,  $J$  = 23 Hz), 100.7, 61.0, 23.9, 15.4, 13.3.

**$^{19}F$  NMR** (235 MHz, acetone- $d_6$ )  $\delta$  -113.1.

**HRMS (-ESI):** calcd for  $C_{19}H_{18}N_2O_4F$   $[M-H]^-$  357.1274, found 357.1277.

**mp:** 92-94 °C.

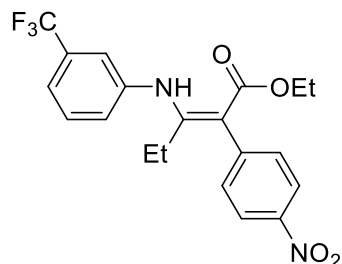

**ethyl (Z)-2-(4-nitrophenyl)-3-((3-(trifluoromethyl)phenyl)amino)pent-2-enoate**

Prepared according to general procedure **C** by using N-(4-nitrophenyl)-3-(trifluoromethyl)aniline (1.2 equiv.), ethyl pent-2-ynoate (0.3 mmol) and Cs<sub>2</sub>CO<sub>3</sub> (1.5 equiv.) to yield the titled compound as yellow oil (66.2 mg, 54%).

**<sup>1</sup>H NMR** (400 MHz, acetone-*d*<sub>6</sub>) δ 11.38 (s, 1H), 8.26 (d, *J* = 8.8 Hz, 2H), 7.74 – 7.56 (m, 6H), 4.12 (q, *J* = 7.1 Hz, 2H), 2.39 (q, *J* = 7.5 Hz, 2H), 1.14 (t, *J* = 7.2 Hz, 3H), 0.81 (t, *J* = 7.5 Hz, 3H).

**<sup>13</sup>C NMR** (100 MHz, acetone-*d*<sub>6</sub>) δ 170.7, 164.1, 148.3, 147.3, 142.1, 134.9, 132.8 (q, *J* = 32.1 Hz), 132.0, 130.6, 125.7 (q, *J* = 270.2 Hz), 124.5, 123.6 (q, *J* = 3.8 Hz), 123.4 (q, *J* = 3.8 Hz), 101.2, 61.1, 23.9, 15.4, 13.2.

**<sup>19</sup>F NMR** (235 MHz, acetone-*d*<sub>6</sub>) δ -63.2.

**HRMS (-ESI)**: calcd for C<sub>20</sub>H<sub>18</sub>N<sub>2</sub>O<sub>4</sub>F<sub>3</sub> [M-H]<sup>-</sup> 407.1224, found 407.1302.

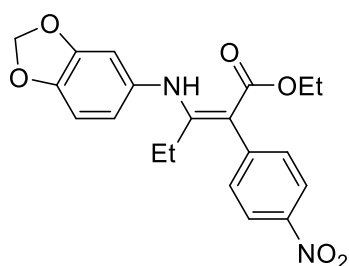

**ethyl (Z)-3-(benzo[d][1,3]dioxol-5-ylamino)-2-(4-nitrophenyl)pent-2-enoate**

Prepared according to general procedure **C** by using N-(4-nitrophenyl)benzo[d][1,3]dioxol-5-amine (1.2 equiv.), ethyl pent-2-ynoate (0.3 mmol) and Cs<sub>2</sub>CO<sub>3</sub> (1.5 equiv.) to yield the titled compound as yellow solid (26.5 mg, 23%).

**<sup>1</sup>H NMR** (400 MHz, acetone-*d*<sub>6</sub>) δ 11.11 (s, 1H), 8.24 (d, *J* = 8.9 Hz, 2H), 7.56 (d, *J* = 9.0 Hz, 2H), 6.92 (d, *J* = 8.1 Hz, 1H), 6.89 (d, *J* = 2.1 Hz, 1H), 6.81 (dd, *J* = 8.1, 1.4 Hz, 1H), 6.10 (s, 2H), 4.09 (q, *J* = 7.1 Hz, 2H), 2.28 (q, *J* = 7.5 Hz, 2H), 1.12 (t, *J* = 7.1 Hz, 3H), 0.79 (t, *J* = 7.5 Hz, 3H).

**<sup>13</sup>C NMR** (100 MHz, acetone-*d*<sub>6</sub>) δ 170.7, 165.9, 149.9, 148.0, 147.9, 147.8, 135.0, 134.7, 124.4, 121.4, 109.7, 109.4, 103.5, 98.6, 60.7, 23.9, 15.5, 13.4.

**HRMS (-ESI)**: calcd for C<sub>20</sub>H<sub>19</sub>N<sub>2</sub>O<sub>6</sub> [M-H]<sup>-</sup> 383.1261, found 383.1262.

**mp**: 103-105 °C.

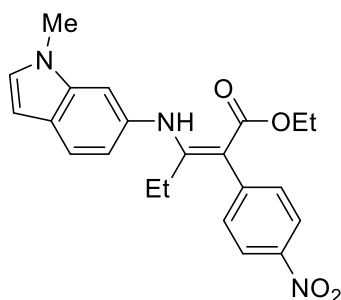

**ethyl (Z)-3-((1-methyl-1H-indol-6-yl)amino)-2-(4-nitrophenyl)pent-2-enoate**

Prepared according to general procedure **C** by using 1-methyl-N-(4-nitrophenyl)-1H-indol-6-amine (1.2 equiv.), ethyl pent-2-ynoate (0.17 mmol) and KOH (1.5 equiv.) to yield the titled compound as yellow solid (18.7 mg, 28%).

**<sup>1</sup>H NMR** (400 MHz, acetone-*d*<sub>6</sub>) δ 11.40 (s, 1H), 8.25 (d, *J* = 8.9 Hz, 2H), 7.63 (d, *J* = 8.3 Hz, 1H), 7.59 (d, *J* = 8.5 Hz, 2H), 7.39 (s, 1H), 7.31 (d, *J* = 3.1 Hz, 1H), 7.02 (dd, *J* = 8.3, 1.9 Hz, 1H), 6.50 (d, *J* = 3.2 Hz, 1H), 4.12 (q, *J* = 7.0 Hz, 2H), 3.90 (s, 3H), 2.35 (q, *J* = 7.6 Hz, 2H), 1.15 (t, *J* = 7.1 Hz, 3H), 0.78 (t, *J* = 7.5 Hz, 3H).

**<sup>13</sup>C NMR** (100 MHz, acetone-*d*<sub>6</sub>) δ 170.8, 166.4, 148.2, 148.0, 138.7, 135.1, 134.5, 131.9, 128.8, 124.4, 122.5, 120.0, 109.1, 102.3, 97.9, 60.6, 33.8, 24.0, 15.5, 13.6.

**HRMS (+ESI)**: calcd for C<sub>22</sub>H<sub>23</sub>N<sub>3</sub>O<sub>4</sub>Na [M+Na]<sup>+</sup> 416.1581, found 416.1585.

mp: 120-121 °C.

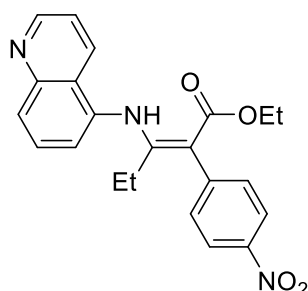

**ethyl (Z)-2-(4-nitrophenyl)-3-(quinolin-5-ylamino)pent-2-enoate**

Prepared according to general procedure **C** by using N-(4-nitrophenyl)quinolin-5-amine (1.2 equiv.), ethyl pent-2-ynoate (0.3 mmol) and Cs<sub>2</sub>CO<sub>3</sub> (1.5 equiv.) to yield the titled compound as yellow solid (23.4 mg, 20%).

**<sup>1</sup>H NMR** (400 MHz, acetone-*d*<sub>6</sub>) δ 11.53 (s, 1H), 9.02 (dd, *J* = 4.2, 1.7 Hz, 1H), 8.54 (d, *J* = 8.4 Hz, 1H), 8.27 (d, *J* = 8.7 Hz, 2H), 8.07 (d, *J* = 8.5 Hz, 1H), 7.85 (t, *J* = 8.0 Hz, 1H), 7.69 – 7.63 (m, 4H), 4.17 (q, *J* = 7.1 Hz, 2H), 2.24 (q, *J* = 7.5 Hz, 2H), 1.17 (t, *J* = 7.1 Hz, 3H), 0.68 (t, *J* = 7.5 Hz, 3H).

**<sup>13</sup>C NMR** (100 MHz, acetone-*d*<sub>6</sub>) δ 171.1, 166.1, 152.6, 150.8, 148.2, 147.5, 137.1, 135.0, 132.4, 130.6, 130.0, 127.6, 126.3, 124.5, 123.7, 100.1, 61.0, 24.4, 15.4, 13.7.

**HRMS (+ESI)**: calcd for C<sub>22</sub>H<sub>21</sub>N<sub>3</sub>O<sub>4</sub> [M+Na]<sup>+</sup> 414.1424, found 414.1422.

mp: 108-110 °C.

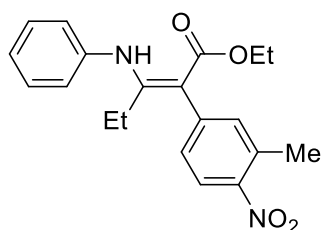

**ethyl (Z)-2-(3-methyl-4-nitrophenyl)-3-(phenylamino)pent-2-enoate**

Prepared according to general procedure **C** by using 3-methyl-4-nitro-N-phenylaniline (1.2 equiv.), ethyl pent-2-ynoate (0.3 mmol) and Cs<sub>2</sub>CO<sub>3</sub> (1.5 equiv.) to yield the titled compound as yellow solid (21.2 mg, 20%).

**<sup>1</sup>H NMR** (400 MHz, acetone-*d*<sub>6</sub>) δ 11.30 (s, 1H), 8.00 (d, *J* = 8.3 Hz, 1H), 7.47 (t, *J* = 7.8 Hz, 2H), 7.40 (s, 1H), 7.37 (d, *J* = 8.2 Hz, 1H), 7.33 – 7.29 (m, 3H), 4.11 (q, *J* = 7.1 Hz, 2H), 2.62 (s, 3H), 2.34 (q, *J* = 7.6 Hz, 2H), 1.14 (t, *J* = 7.0 Hz, 3H), 0.79 (t, *J* = 7.5 Hz, 3H).

**<sup>13</sup>C NMR** (100 MHz, acetone-*d*<sub>6</sub>) δ 170.9, 165.1, 149.2, 145.8, 141.1, 138.1, 134.3, 132.6, 131.0, 127.4, 127.3, 125.7, 99.4, 60.7, 23.9, 21.1, 15.5, 13.4.

**HRMS (+ESI)**: calcd for C<sub>20</sub>H<sub>22</sub>N<sub>2</sub>O<sub>4</sub>Na [M+H]<sup>+</sup> 377.1472, found 377.1471.

mp: 73-74 °C.

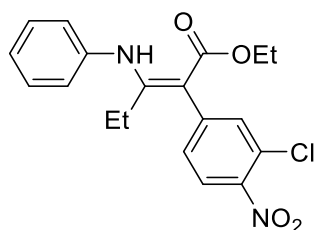

**ethyl (Z)-2-(3-chloro-4-nitrophenyl)-3-(phenylamino)pent-2-enoate**

Prepared according to general procedure **C** by using 3-chloro-4-nitro-N-phenylaniline (1.2 equiv.), ethyl pent-2-ynoate (0.3 mmol) and Cs<sub>2</sub>CO<sub>3</sub> (1.5 equiv.) to yield the titled compound

as yellow gum (50.5 mg, 45%).

**<sup>1</sup>H NMR** (400 MHz, acetone-*d*<sub>6</sub>) δ 11.33 (s, 1H), 8.03 (d, *J* = 8.3 Hz, 1H), 7.64 (s, 1H), 7.53 – 7.46 (m, 3H), 7.35 – 7.30 (m, 3H), 4.12 (q, *J* = 7.0 Hz, 2H), 2.37 (q, *J* = 7.5 Hz, 2H), 1.15 (t, *J* = 6.8 Hz, 3H), 0.80 (t, *J* = 7.5 Hz, 3H).

**<sup>13</sup>C NMR** (100 MHz, acetone-*d*<sub>6</sub>) δ 170.5, 165.6, 147.9, 146.7, 140.8, 136.7, 133.8, 131.0, 127.6, 127.4, 126.7, 98.3, 60.9, 23.9, 15.5, 13.3.

**HRMS (+ESI)**: calcd for C<sub>19</sub>H<sub>19</sub>N<sub>2</sub>O<sub>4</sub>ClNa [M+Na]<sup>+</sup> 397.0926, found 397.0932.

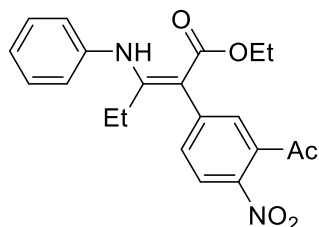

**ethyl (Z)-2-(3-acetyl-4-nitrophenyl)-3-(phenylamino)pent-2-enoate**

Prepared according to general procedure **C** by using 1-(2-nitro-5-(phenylamino)phenyl)ethan-1-one (1.2 equiv.), ethyl pent-2-ynoate (0.3 mmol) and Cs<sub>2</sub>CO<sub>3</sub> (1.5 equiv.) to yield the titled compound as brown solid (59.5 mg, 52%).

**<sup>1</sup>H NMR** (400 MHz, acetone-*d*<sub>6</sub>) δ 1.36 (s, 1H), 8.10 (d, *J* = 8.4 Hz, 1H), 7.65 (dd, *J* = 8.4, 1.9 Hz, 1H), 7.61 (d, *J* = 1.9 Hz, 1H), 7.50 – 7.45 (m, 2H), 7.34 – 7.30 (m, 1H), 4.12 (q, *J* = 7.1 Hz, 2H), 2.62 (s, 3H), 2.38 (q, *J* = 7.5 Hz, 2H), 1.15 (t, *J* = 7.1 Hz, 3H), 0.80 (t, *J* = 7.5 Hz, 3H).

**<sup>13</sup>C NMR** (100 MHz, acetone-*d*<sub>6</sub>) δ 200.5, 170.5, 165.5, 147.0, 145.9, 140.8, 138.7, 136.2, 133.0, 131.0, 127.6, 127.4, 125.5, 98.6, 60.9, 30.73, 23.9, 15.4, 13.3.

**HRMS (+ESI)**: calcd for C<sub>21</sub>H<sub>22</sub>N<sub>2</sub>O<sub>5</sub>Na [M+Na]<sup>+</sup> 405.1421, found 405.1424.

**mp**: 116–117 °C.

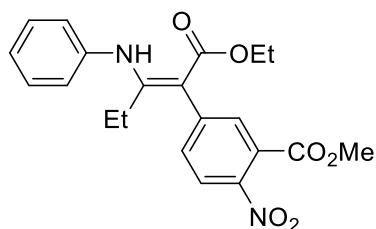

**methyl (Z)-5-(1-ethoxy-1-oxo-3-(phenylamino)pent-2-en-2-yl)-2-nitrobenzoate**

Prepared according to general procedure **C** by using methyl 2-nitro-5-(phenylamino)benzoate (1.2 equiv.), ethyl pent-2-ynoate (0.3 mmol) and Cs<sub>2</sub>CO<sub>3</sub> (1.5 equiv.) to yield the titled compound as yellow oil (52.5 mg, 44%).

**<sup>1</sup>H NMR** (400 MHz, acetone-*d*<sub>6</sub>) δ 11.34 (s, 1H), 8.04 (dt, *J* = 8.6, 1.0 Hz, 1H), 7.73 – 7.70 (m, 2H), 7.50 – 7.46 (m, 2H), 7.36 – 7.30 (m, 3H), 4.12 (q, *J* = 7.1 Hz, 2H), 3.93 (s, 3H), 2.35 (q, *J* = 7.5 Hz, 2H), 1.14 (t, *J* = 7.1 Hz, 3H), 0.79 (t, *J* = 7.5 Hz, 3H).

**<sup>13</sup>C NMR** (100 MHz, acetone-*d*<sub>6</sub>) δ 170.5, 167.2, 165.6, 148.0, 146.2, 140.8, 137.4, 135.0, 131.0, 128.7, 127.6, 127.4, 125.3, 98.3, 60.9, 54.2, 23.9, 15.4, 13.3.

**HRMS (+ESI)**: calcd for C<sub>21</sub>H<sub>22</sub>N<sub>2</sub>O<sub>6</sub>Na [M+Na]<sup>+</sup> 421.1370, found 421.1372.

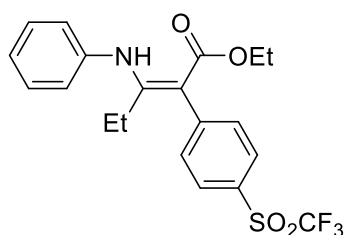

**ethyl (Z)-3-(phenylamino)-2-(4-((trifluoromethyl)sulfonyl)phenyl)pent-2-enoate**

Prepared according to general procedure **C** by using N-phenyl-4-((trifluoromethyl)sulfonyl)aniline (1.2 equiv.), ethyl pent-2-ynoate (0.3 mmol) and Cs<sub>2</sub>CO<sub>3</sub> (1.5 equiv.) to yield the titled compound as yellow solid (38.4 mg, 30%).

**<sup>1</sup>H NMR** (400 MHz, acetone-*d*<sub>6</sub>) δ 11.36 (s, 1H), 8.12 (d, *J* = 8.4 Hz, 2H), 7.79 (d, *J* = 8.7 Hz, 2H), 7.50 – 7.46 (m, 2H), 7.35 – 7.31 (m, 3H), 4.12 (q, *J* = 7.1 Hz, 2H), 2.36 (q, *J* = 7.5 Hz, 2H), 1.13 (t, *J* = 7.0 Hz, 3H), 0.78 (t, *J* = 7.5 Hz, 3H).

**<sup>13</sup>C NMR** (100 MHz, acetone-*d*<sub>6</sub>) δ 170.5, 165.5, 150.4, 140.9, 135.9, 131.8, 131.0, 129.8, 127.7, 127.4, 122.7 (q, *J* = 324 Hz), 99.1, 60.9, 23.9, 15.4, 13.2.

**<sup>19</sup>F NMR** (235 MHz, acetone-*d*<sub>6</sub>) δ -80.0.

**HRMS (+ESI)**: calcd for C<sub>20</sub>H<sub>20</sub>NO<sub>4</sub>F<sub>3</sub>SNa [M+Na]<sup>+</sup> 450.0957, found 450.0961.

**mp**: 90-91 °C.

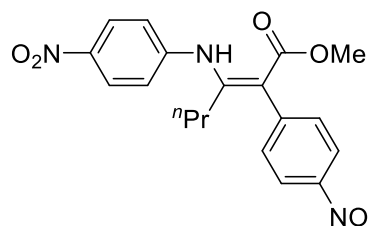

**methyl (Z)-2-(4-nitrophenyl)-3-((4-nitrophenyl)amino)hex-2-enoate**

Prepared according to general procedure **C** by using bis(4-nitrophenyl)amine (1.2 equiv.), methyl hex-2-ynoate (0.3 mmol) and Cs<sub>2</sub>CO<sub>3</sub> (1.5 equiv.) to yield the titled compound as yellow solid (84.3 mg, 73%).

**<sup>1</sup>H NMR** (400 MHz, acetone-*d*<sub>6</sub>) δ 11.55 (s, 1H), 8.31 (d, *J* = 9.1 Hz, 2H), 8.28 (d, *J* = 8.7 Hz, 2H), 7.61 (d, *J* = 8.8 Hz, 2H), 7.50 (d, *J* = 9.0 Hz, 2H), 3.64 (s, 3H), 2.55 – 2.48 (m, 2H), 1.39 – 1.30 (m, 2H), 0.67 (t, *J* = 7.4 Hz, 3H).

**<sup>13</sup>C NMR** (100 MHz, acetone-*d*<sub>6</sub>) δ 171.0, 160.8, 148.5, 147.9, 146.7, 145.3, 134.7, 126.8, 124.7, 124.2, 104.8, 52.5, 32.8, 22.4, 14.5.

**HRMS (+ESI)**: calcd for C<sub>19</sub>H<sub>19</sub>N<sub>3</sub>O<sub>6</sub>Na [M+Na]<sup>+</sup> 408.1166, found 408.1170.

**mp**: 137-139 °C.

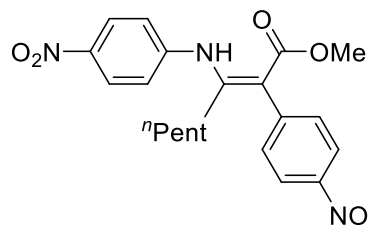

**methyl (Z)-2-(4-nitrophenyl)-3-((4-nitrophenyl)amino)oct-2-enoate**

Prepared according to general procedure **C** by using bis(4-nitrophenyl)amine (1.2 equiv.), methyl oct-2-ynoate (0.3 mmol) and Cs<sub>2</sub>CO<sub>3</sub> (1.5 equiv.) to yield the titled compound as orange gum (84.3 mg, 73%).

**<sup>1</sup>H NMR** (400 MHz, acetone-*d*<sub>6</sub>) δ 11.56 (s, 1H), 8.32 (d, *J* = 9.1 Hz, 2H), 8.29 (d, *J* = 8.9 Hz, 2H), 7.62 (d, *J* = 8.7 Hz, 2H), 7.51 (d, *J* = 9.0 Hz, 2H), 3.64 (s, 3H), 2.57 – 2.49 (m, 2H), 1.37 – 1.29 (m, 2H), 1.06 – 0.99 (m, 4H), 0.67 (t, *J* = 7.0 Hz, 3H).

**<sup>13</sup>C NMR** (100 MHz, acetone-*d*<sub>6</sub>) δ 170.9, 161.2, 148.5, 147.8, 146.7, 145.3, 134.7, 126.7, 124.7, 124.4, 104.5, 52.5, 32.5, 30.77, 28.5, 23.1, 14.6.

**HRMS (+ESI)**: calcd for C<sub>21</sub>H<sub>23</sub>N<sub>3</sub>O<sub>6</sub>Na [M+Na]<sup>+</sup> 436.1479, found 436.1481.

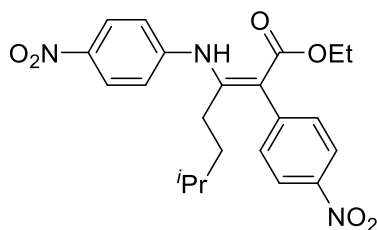

**ethyl (Z)-6-methyl-2-(4-nitrophenyl)-3-((4-nitrophenyl)amino)hept-2-enoate**

Prepared according to general procedure **C** by using bis(4-nitrophenyl)amine (1.2 equiv.), ethyl 6-methylhept-2-ynoate (0.3 mmol) and  $\text{Cs}_2\text{CO}_3$  (1.5 equiv.) to yield the titled compound as yellow oil (63.4 mg, 50%).

**$^1\text{H}$  NMR** (400 MHz, acetone- $d_6$ )  $\delta$  11.56 (s, 1H), 8.32 (d,  $J$  = 9.0 Hz, 2H), 8.29 (d,  $J$  = 8.8 Hz, 2H), 7.63 (d,  $J$  = 8.8 Hz, 2H), 7.52 (d,  $J$  = 9.0 Hz, 2H), 4.14 (q,  $J$  = 7.1 Hz, 2H), 2.58 – 2.47 (m, 2H), 1.30 – 1.19 (m, 3H), 1.14 (t,  $J$  = 7.1 Hz, 3H), 0.57 (d,  $J$  = 6.4 Hz, 6H).

**$^{13}\text{C}$  NMR** (100 MHz, acetone- $d_6$ )  $\delta$  170.5, 161.4, 148.4, 147.8, 146.8, 145.3, 134.8, 126.7, 124.6, 104.7, 61.5, 37.9, 29.2, 28.9, 22.8, 15.3.

**HRMS (-ESI)**: calcd for  $\text{C}_{22}\text{H}_{24}\text{N}_3\text{O}_6$   $[\text{M}-\text{H}]^-$  426.1688, found 426.1705.

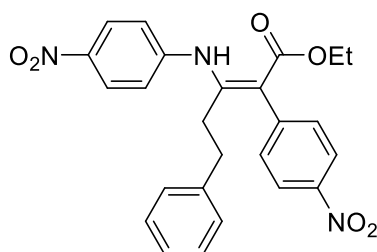

**ethyl (Z)-2-(4-nitrophenyl)-3-((4-nitrophenyl)amino)-5-phenylpent-2-enoate**

Prepared according to general procedure **C** by using bis(4-nitrophenyl)amine (1.2 equiv.), ethyl 5-phenylpent-2-ynoate (0.3 mmol) and  $\text{Cs}_2\text{CO}_3$  (1.5 equiv.) to yield the titled compound as yellow oil (47.0 mg, 34%).

**$^1\text{H}$  NMR** (400 MHz, acetone- $d_6$ )  $\delta$  11.51 (s, 1H), 8.34 (d,  $J$  = 9.0 Hz, 2H), 8.25 (d,  $J$  = 8.8 Hz, 2H), 7.56 (d,  $J$  = 9.1 Hz, 2H), 7.48 (d,  $J$  = 8.7 Hz, 2H), 7.19 – 7.15 (m, 3H), 6.85 – 6.79 (m, 2H), 4.14 (q,  $J$  = 7.0 Hz, 2H), 2.84 (t,  $J$  = 7.2 Hz, 2H), 2.59 (t,  $J$  = 7.2 Hz, 2H), 1.13 (t,  $J$  = 7.1 Hz, 3H).

**$^{13}\text{C}$  NMR** (100 MHz, acetone- $d_6$ )  $\delta$  170.5, 159.4, 148.4, 147.8, 146.6, 145.4, 141.5, 134.7, 130.0, 129.7, 127.9, 126.8, 124.58, 124.56, 105.7, 61.5, 34.7, 33.21, 15.25.

**HRMS (+ESI)**: calcd for  $\text{C}_{25}\text{H}_{23}\text{N}_3\text{O}_6\text{Na}$   $[\text{M}+\text{Na}]^+$  484.1479, found 484.1486.

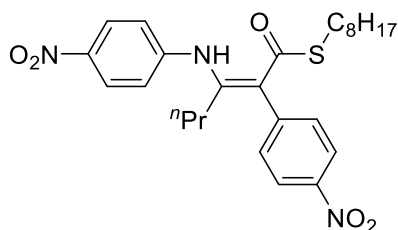

**S-octyl (Z)-2-(4-nitrophenyl)-3-((4-nitrophenyl)amino)hex-2-enethioate**

Prepared according to general procedure **C** by using bis(4-nitrophenyl)amine (1.2 equiv.), S-octyl hex-2-ynethioate (0.2 mmol) and  $\text{Cs}_2\text{CO}_3$  (1.5 equiv.) to yield the titled compound as yellow oil (38.9 mg, 39%).

**$^1\text{H}$  NMR** (500 MHz, acetone- $d_6$ )  $\delta$  12.23 (s, 1H), 8.35 (d,  $J$  = 4.9 Hz, 2H), 8.33 (d,  $J$  = 5.2 Hz, 2H), 7.73 (d,  $J$  = 8.7 Hz, 2H), 7.56 (d,  $J$  = 9.0 Hz, 2H), 2.89 – 2.85 (m, 4H), 2.41 – 2.34 (m, 2H), 1.59 – 1.53 (m, 2H), 1.37 – 1.29 (m, 10H), 0.90 (t,  $J$  = 6.9 Hz, 3H), 0.66 (t,  $J$  = 7.4 Hz, 3H).

**$^{13}\text{C}$  NMR** (125 MHz, acetone- $d_6$ )  $\delta$  192.3, 158.4, 149.4, 147.3, 145.8, 145.7, 136.4, 126.7, 125.2, 124.9, 113.2, 33.3, 33.1, 31.2, 30.81, 30.63, 30.58, 30.39, 24.0, 22.4, 15.1, 14.6.

**HRMS (-ESI):** calcd for  $C_{26}H_{32}N_3O_5S$   $[M-H]^-$  498.2083, found 498.2110.

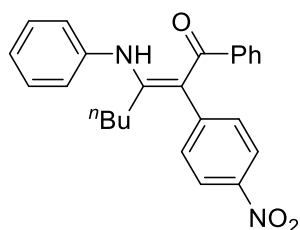

**(Z)-2-(4-nitrophenyl)-3-((4-nitrophenyl)amino)-1-phenylhept-2-en-1-one**

Prepared according to general procedure **C** by using 4-nitro-N-phenylaniline (1.2 equiv.), 1-phenylhept-2-yn-1-one (0.3 mmol) and  $Cs_2CO_3$  (1.5 equiv.) to yield the titled compound as orange gum (26.4 mg, 22%).

**$^1H$  NMR** (400 MHz, acetone- $d_6$ )  $\delta$  14.33 (s, 1H), 8.11 (d,  $J$  = 8.8 Hz, 2H), 7.56 – 7.50 (m, 4H), 7.47 – 7.37 (m, 3H), 7.25 – 7.13 (m, 5H), 2.54 – 2.43 (m, 2H), 1.29 – 1.19 (m, 2H), 0.95 (q,  $J$  = 7.3 Hz, 2H), 0.51 (t,  $J$  = 7.4 Hz, 3H).

**$^{13}C$  NMR** (100 MHz, acetone- $d_6$ )  $\delta$  194.0, 168.4, 149.5, 147.8, 144.0, 140.2, 136.0, 131.1, 130.3, 129.6, 129.0, 128.3, 127.6, 124.4, 110.2, 31.2, 23.6, 14.1.

**HRMS (+ESI):** calcd for  $C_{25}H_{24}N_2O_3Na$   $[M+Na]^+$  423.1687, found 423.1685.

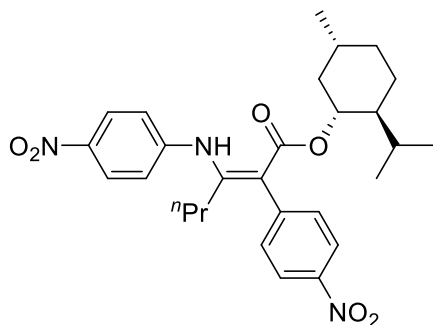

**(1R,2S,5R)-2-isopropyl-5-methylcyclohexyl amino)hex-2-enoate**

**(Z)-2-(4-nitrophenyl)-3-((4-nitrophenyl)-**

Prepared according to general procedure **C** by using bis(4-nitrophenyl)amine (1.2 equiv.), (1R,2S,5R)-2-isopropyl-5-methylcyclohexyl hex-2-ynoate (0.2 mmol) and  $Cs_2CO_3$  (1.5 equiv.) to yield the titled compound as yellow solid (53.9 mg, 53%).

**$^1H$  NMR** (400 MHz, acetone- $d_6$ )  $\delta$  11.61 (s, 1H), 8.31 (d,  $J$  = 6.1 Hz, 2H), 8.29 (d,  $J$  = 5.8 Hz, 2H), 7.60 (d,  $J$  = 8.8 Hz, 2H), 7.49 (d,  $J$  = 9.0 Hz, 2H), 4.72 (td,  $J$  = 10.6, 4.4 Hz, 1H), 2.54 – 2.50 (m, 2H), 2.10 – 2.01 (m, 1H), 1.74 – 1.59 (m, 3H), 1.55 – 1.44 (m, 1H), 1.41 – 1.30 (m, 3H), 1.12 – 1.08 (m, 1H), 0.91 (d,  $J$  = 6.5 Hz, 3H), 0.87 – 0.81 (m, 2H), 0.78 (d,  $J$  = 7.1 Hz, 3H), 0.74 (d,  $J$  = 7.0 Hz, 3H), 0.69 (t,  $J$  = 7.4 Hz, 3H).

**$^{13}C$  NMR** (100 MHz, acetone- $d_6$ )  $\delta$  170.1, 160.3, 148.4, 148.0, 146.9, 145.0, 134.7, 126.8, 124.6, 123.9, 105.6, 75.4, 48.5, 42.4, 35.6, 33.0, 32.9, 27.7, 24.8, 23.1, 22.4, 21.6, 17.5, 14.6.

**HRMS (+ESI):** calcd for  $C_{28}H_{35}N_3O_6Na$   $[M+Na]^+$  532.2423, found 532.2424.

**mp:** 112–113 °C.

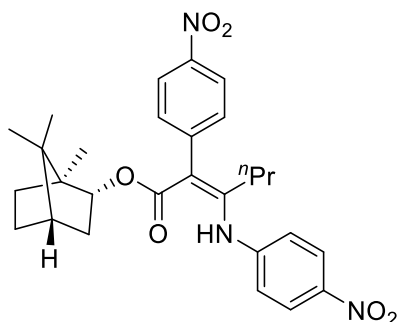



**(1S,2S,4S)-1,7,7-trimethylbicyclo[2.2.1]heptan-2-yl  
nitrophenyl)-mino)hex-2-enoate**

**(Z)-2-(4-nitrophenyl)-3-((4-**

Prepared according to general procedure **C** by using bis(4-nitrophenyl)amine (1.2 equiv.), (1R,2R,4R)-1,7,7-trimethylbicyclo[2.2.1]heptan-2-yl hex-2-ynoate (0.2 mmol) and Cs<sub>2</sub>CO<sub>3</sub> (1.5 equiv.) to yield the titled compound as yellow solid (80.0 mg, 79%).

**<sup>1</sup>H NMR** (400 MHz, acetone-*d*<sub>6</sub>) δ 11.57 (s, 1H), 8.32 (t, *J* = 8.9 Hz, 4H), 7.65 (d, *J* = 8.7 Hz, 2H), 7.50 (d, *J* = 9.1 Hz, 2H), 4.89 (ddd, *J* = 9.8, 3.4, 2.0 Hz, 1H), 2.57 – 2.53 (m, 2H), 2.41 – 2.33 (m, 1H), 1.66 – 1.58 (m, 2H), 1.42 – 1.30 (m, 3H), 1.20 – 1.13 (m, 1H), 1.05 – 1.02 (m, 1H), 1.00 – 0.97 (m, 1H), 0.92 (s, 3H), 0.84 (s, 3H), 0.73 (s, 3H), 0.70 (t, *J* = 7.3 Hz, 3H).

**<sup>13</sup>C NMR** (100 MHz, acetone-*d*<sub>6</sub>) δ 170.7, 160.2, 148.4, 147.9, 147.0, 145.1, 134.7, 126.8, 124.6, 123.9, 105.7, 81.1, 50.08, 50.06, 49.0, 46.4, 38.6, 32.9, 29.1, 28.2, 22.4, 20.6, 19.9, 14.6, 14.50.

**HRMS (+ESI)**: calcd for C<sub>28</sub>H<sub>33</sub>N<sub>3</sub>O<sub>6</sub>Na [M+Na]<sup>+</sup> 530.2266, found 530.2265.

mp: 140-142 °C.

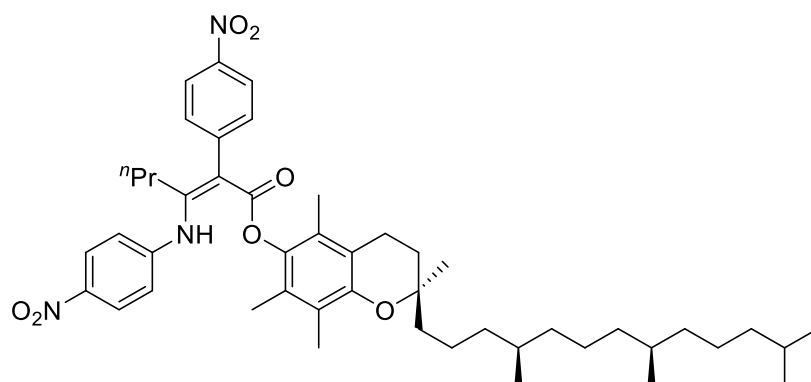

**(R)-2,5,7,8-tetramethyl-2-((4R,8R)-4,8,12-trimethyltridecyl)chroman-6-yl  
nitrophenyl)-3-((4-nitrophenyl)amino)hex-2-enoate**

**(Z)-2-(4-**

Prepared according to general procedure **C** by using bis(4-nitrophenyl)amine (1.2 equiv.), (R)-2,5,7,8-tetramethyl-2-((4R,8R)-4,8,12-trimethyltridecyl)chroman-6-yl hex-2-ynoate (0.2 mmol) and Cs<sub>2</sub>CO<sub>3</sub> (1.5 equiv.) to yield the titled compound as yellow solid (108.0 mg, 69%).

**<sup>1</sup>H NMR** (400 MHz, acetone-*d*<sub>6</sub>) δ 11.61 (s, 1H), 8.36 (d, *J* = 8.8 Hz, 2H), 8.30 (d, *J* = 9.1 Hz, 2H), 7.83 (d, *J* = 8.7 Hz, 2H), 7.51 (d, *J* = 9.1 Hz, 2H), 2.66 – 2.54 (m, 4H), 2.11 – 2.07 (m, 3H), 2.00 (s, 3H), 1.96 (s, 3H), 1.82 (dt, *J* = 12.3, 6.8 Hz, 2H), 1.56 (dt, *J* = 18.3, 7.0 Hz, 3H), 1.49 – 1.39 (m, 5H), 1.38 – 1.23 (m, 11H), 1.22 – 1.07 (m, 6H), 0.89 (p, *J* = 6.4 Hz, 13H), 0.73 (t, *J* = 7.4 Hz, 3H).

**<sup>13</sup>C NMR** (100 MHz, acetone-*d*<sub>6</sub>) δ 169.1, 162.6, 150.6, 148.7, 147.4, 146.8, 145.4, 142.3, 134.8, 128.3, 126.8, 125.0, 124.4, 123.9, 119.0, 103.5, 76.8, 40.8, 38.9, 38.84, 38.79, 38.74, 38.71, 34.22, 34.18, 33.0, 29.4, 26.3, 25.84, 25.80, 25.1, 24.7, 23.8, 23.7, 22.5, 21.9, 20.9, 20.8, 20.7, 14.7, 14.1, 13.2, 12.7.

**HRMS (-ESI)**: calcd for C<sub>47</sub>H<sub>64</sub>N<sub>3</sub>O<sub>7</sub> [M-H]<sup>-</sup> 782.4785, found 782.4788.

mp: 51-52 °C.

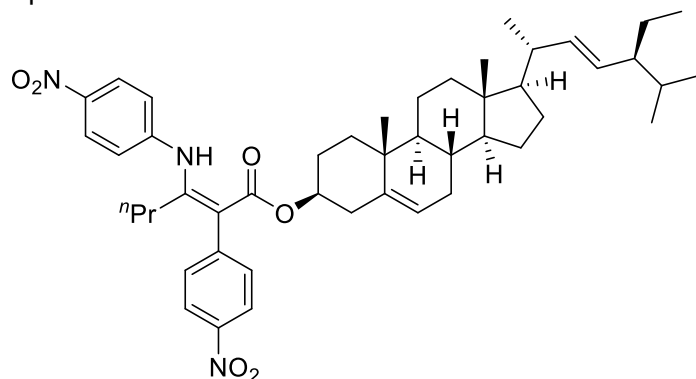

**(3S,8S,9S,10R,13R,14S,17R)-17-((2R,5S,E)-5-ethyl-6-methylhept-3-en-2-yl)-10,13-dimethyl-2,3,4,7,8,9,10,11,12,13,14,15,16,17-tetradecahydro-1H-cyclopenta[a]phenanthren-3-yl (Z)-2-(4-nitrophenyl)-3-((4-nitrophenyl)amino)hex-2-enoate**

Prepared according to general procedure **C** by using bis(4-nitrophenyl)amine (1.2 equiv.), (3S,8S,9S,10R,13R,14S,17R)-17-((2R,5S,E)-5-ethyl-6-methylhept-3-en-2-yl)-10,13-dimethyl-2,3,4,7,8,9,10,11,12,13,14,15,16,17-tetradecahydro-1H-cyclopenta[a]phenanthren-3-yl hex-2-ynoate (0.2 mmol) and Cs<sub>2</sub>CO<sub>3</sub> (1.5 equiv.) to yield the titled compound as yellow solid (96.3 mg, 63%).

**<sup>1</sup>H NMR** (400 MHz, CD<sub>2</sub>Cl<sub>2</sub>) δ 11.60 (s, 1H), 8.21 (d, *J* = 5.1 Hz, 2H), 8.19 (d, *J* = 4.7 Hz, 2H), 7.40 (d, *J* = 8.7 Hz, 2H), 7.21 (d, *J* = 9.0 Hz, 2H), 5.35 (dd, *J* = 4.8, 2.4 Hz, 1H), 5.17 (dd, *J* = 15.1, 8.6 Hz, 1H), 5.03 (dd, *J* = 15.1, 8.6 Hz, 1H), 4.62 – 4.54 (m, 1H), 2.37 – 2.33 (m, 2H), 2.23 (ddd, *J* = 13.0, 5.0, 2.2 Hz, 1H), 2.12 – 1.90 (m, 4H), 1.82 (dt, *J* = 13.2, 3.5 Hz, 1H), 1.78 – 1.66 (m, 2H), 1.49 – 0.89 (m, 24H), 0.86 – 0.79 (m, 10H), 0.69 (s, 3H), 0.64 (t, *J* = 7.4 Hz, 3H).

**<sup>13</sup>C NMR** (100 MHz, CD<sub>2</sub>Cl<sub>2</sub>) δ 169.1, 159.2, 147.1, 146.5, 145.4, 144.0, 140.2, 138.8, 133.2, 129.7, 125.6, 123.4, 122.9, 122.8, 104.0, 74.5, 57.2, 56.4, 51.7, 50.5, 42.6, 40.9, 40.1, 38.5, 37.4, 37.0, 32.3, 32.3, 32.2, 31.8, 29.3, 28.1, 25.8, 24.7, 21.5, 21.4, 21.2, 19.5, 19.2, 13.7, 12.4, 12.2.

**HRMS (-ESI)**: calcd for C<sub>47</sub>H<sub>62</sub>N<sub>3</sub>O<sub>6</sub> [M-H]<sup>-</sup> 764.4668, found 764.4668.

**mp**: 126-128 °C.

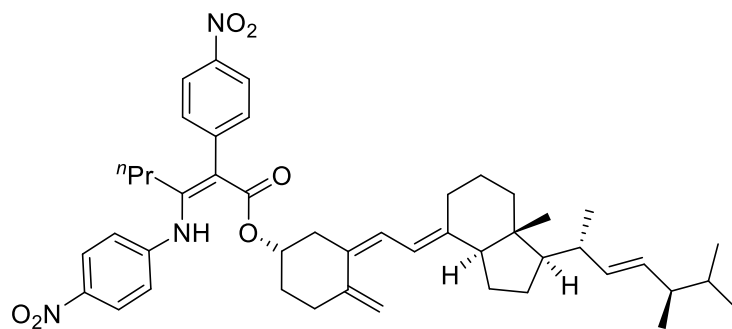

**(S,Z)-3-(2-((1R,3aS,7aR,E)-1-((2R,5R,E)-5,6-dimethylhept-3-en-2-yl)-7a-methyloctahydro-4H-inden-4-ylidene)ethylidene)-4-methylenecyclohexyl (Z)-2-(4-nitrophenyl)-3-((4-nitrophenyl)amino)hex-2-enoate**

Prepared according to general procedure **C** by using bis(4-nitrophenyl)amine (1.2 equiv.), (S,Z)-3-(2-((1R,3aS,7aR,E)-1-((2R,5R,E)-5,6-dimethylhept-3-en-2-yl)-7a-methyloctahydro-4H-inden-4-ylidene)ethylidene)-4-methylenecyclohexyl hex-2-ynoate (0.2 mmol) and Cs<sub>2</sub>CO<sub>3</sub> (1.5 equiv.) to yield the titled compound as yellow gum (107.5 mg, 72%).

**<sup>1</sup>H NMR** (400 MHz, acetone-*d*<sub>6</sub>) δ 11.57 (s, 1H), 8.31 (d, *J* = 9.1 Hz, 2H), 8.16 (d, *J* = 8.7 Hz, 2H), 7.52 (d, *J* = 8.6 Hz, 2H), 7.48 (d, *J* = 9.0 Hz, 2H), 6.08 (d, *J* = 11.2 Hz, 1H), 5.92 (d, *J* = 11.1 Hz, 1H), 5.34 – 5.24 (m, 2H), 5.17 – 5.13 (m, 1H), 5.00 (s, 1H), 4.72 (s, 1H), 2.84 – 2.84 (m, 1H), 2.55 – 2.45 (m, 3H), 2.34 (dd, *J* = 13.8, 5.0 Hz, 1H), 2.16 – 1.70 (m, 10H), 1.59 – 1.31 (m, 10H), 1.09 (d, *J* = 6.6 Hz, 3H), 0.98 (d, *J* = 6.8 Hz, 3H), 0.89 (d, *J* = 6.7 Hz, 6H), 0.69 (t, *J* = 7.4 Hz, 3H), 0.60 (s, 3H).

**<sup>13</sup>C NMR** (100 MHz, acetone-*d*<sub>6</sub>) δ 169.7, 160.3, 148.0, 147.8, 146.9, 146.5, 145.0, 142.7, 137.4, 136.4, 134.5, 133.4, 126.8, 124.3, 123.8, 123.5, 119.2, 113.1, 105.6, 72.2, 58.0, 57.8, 47.2, 44.5, 43.2, 42.1, 41.9, 34.6, 32.9, 32.7, 32.7, 29.3, 25.1, 23.7, 22.4, 21.1, 20.8, 18.9, 14.6, 13.3.

**HRMS (+ESI)**: calcd for C<sub>46</sub>H<sub>59</sub>N<sub>3</sub>O<sub>6</sub> [M+Na]<sup>+</sup> 772.4285, found 772.4286.

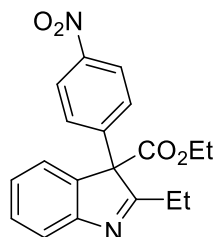

**ethyl 2-ethyl-3-(4-nitrophenyl)-3H-indole-3-carboxylate**

Prepared by adaptation of a literature procedure.<sup>2</sup> To an oven-dried microwave vial were added ethyl (Z)-2-(4-nitrophenyl)-3-(phenylamino)pent-2-enoate (0.2 mmol, 1.0 equiv.), iodine (1.1 equiv.) and K<sub>2</sub>CO<sub>3</sub> (1.2 equiv.). The vial was sealed by a cap and placed on the Schlenk line to evacuate and backfill with N<sub>2</sub> three times. Then DMF (1.0 mL) was added by syringe. The mixture was stirred at 100 °C for 1 h. After cooling to room temperature, water and ethyl acetate were added and the phases were separated. The organic phase was washed with brine three times, followed by dried over anhydrous Na<sub>2</sub>SO<sub>4</sub> and concentrated. The residue was purified by column chromatography on silica gel to yield the titled compound as oil (17.2 mg, 25%).

**<sup>1</sup>H NMR** (400 MHz, acetone-*d*<sub>6</sub>) δ 8.26 (d, *J* = 8.9 Hz, 2H), 7.66 (d, *J* = 7.7 Hz, 1H), 7.55 (td, *J* = 7.6, 1.3 Hz, 1H), 7.49 (dd, *J* = 7.6, 1.2 Hz, 1H), 7.41 – 7.33 (m, 3H), 4.42 – 4.20 (m, 2H), 2.95 – 2.83 (m, 1H), 2.47 – 2.3 (m, 1H), 1.27 (t, *J* = 5.2 Hz, 3H), 1.23 (t, *J* = 4.8 Hz, 3H).

**<sup>13</sup>C NMR** (100 MHz, acetone-*d*<sub>6</sub>) δ 169.7, 160.3, 148.0, 147.8, 146.9, 146.5, 145.0, 142.7, 137.4, 136.4, 134.5, 133.4, 126.8, 124.3, 123.8, 123.5, 119.2, 113.1, 105.6, 72.2, 58.0, 57.8, 47.2, 44.5, 43.2, 42.1, 41.9, 34.6, 32.9, 32.7, 32.7, 29.3, 25.1, 23.7, 22.4, 21.1, 20.8, 18.9, 14.6, 13.3.

**HRMS (+ESI)**: calcd for C<sub>19</sub>H<sub>19</sub>N<sub>2</sub>O<sub>4</sub> [M+H]<sup>+</sup> 339.1339, found 339.1346.

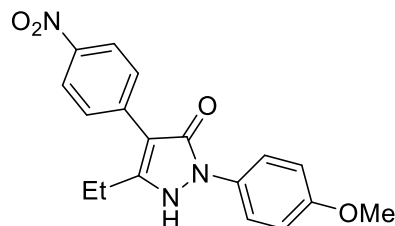

**ethyl 2-ethyl-3-(4-nitrophenyl)-3H-indole-3-carboxylate**

Prepared by adaptation of a literature procedure.<sup>3</sup> To a solution of ethyl (Z)-2-(4-nitrophenyl)-3-(phenylamino)pent-2-enoate (0.2 mmol, 1.0 equiv.) in EtOH was added (4-methoxyphenyl)hydrazine hydrogen chloride (1.0 equiv.). The vial was sealed by a cap then the mixture was refluxed for overnight. After cooling to room temperature, the mixture was poured into cold water. The resulting solid was filtered and washed with EtOH to yield the titled compound as light yellow solid (27.8 mg, 41%).

**<sup>1</sup>H NMR** (400 MHz, DMSO-*d*<sub>6</sub>) δ 8.32 – 8.25 (m, 2H), 7.90 (d, *J* = 8.3 Hz, 2H), 7.64 (d, *J* = 9.0 Hz, 2H), 7.10 (d, *J* = 9.1 Hz, 2H), 3.83 (s, 3H), 3.39 (brs, 1H), 2.83 (q, *J* = 7.5 Hz, 2H), 1.25 (t, *J* = 7.5 Hz, 3H).

**<sup>13</sup>C NMR** (100 MHz, DMSO-*d*<sub>6</sub>) δ 158.3, 151.6, 145.3, 141.5, 128.5, 124.6, 124.0, 115.1, 102.6, 56.3, 31.6, 21.4, 13.3.

**HRMS (+ESI)**: calcd for C<sub>18</sub>H<sub>17</sub>N<sub>3</sub>O<sub>4</sub>Na [M+Na]<sup>+</sup> 362.1111, found 362.1115.

**mp**: 94–95 °C.

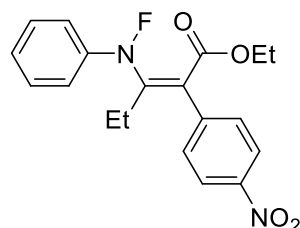

### ethyl (Z)-3-(fluoro(phenyl)amino)-2-(4-nitrophenyl)pent-2-enoate

Prepared by adaptation of a literature procedure.<sup>4</sup> To a solution of ethyl (Z)-2-(4-nitrophenyl)-3-(phenylamino)pent-2-enoate (0.2 mmol, 1.0 equiv.) in DCM/H<sub>2</sub>O (v/v = 1:1, 4 mL) was added selectfluor (5.0 equiv.). The vial was sealed by a cap and the mixture was stirred at room temperature for 72 h. Then the mixture was extracted with DCM (3 mL x 3). The organic layers were combined, dried over anhydrous Na<sub>2</sub>SO<sub>4</sub> and concentrated. The residue was purified by column chromatography on silica gel to yield the titled compound as yellow solid (40.1 mg, 56%).

**<sup>1</sup>H NMR** (500 MHz, acetone-*d*<sub>6</sub>) 8.39 (d, *J* = 8.3 Hz, 2H), 8.05 – 7.98 (m, 2H), 7.45 – 7.37 (m, 2H), 7.16 (tt, *J* = 7.3, 1.2 Hz, 1H), 6.87 – 6.80 (m, 2H), 4.43 – 4.33 (m, 1H), 2.50 – 2.31 (m, 2H), 1.35 (t, *J* = 7.1 Hz, 3H), 0.94 (td, *J* = 7.7, 0.9 Hz, 3H).

**<sup>13</sup>C NMR** (125 MHz, acetone-*d*<sub>6</sub>) δ 172.7 (d, *J* = 22.2 Hz), 167.8 (d, *J* = 20.2 Hz), 150.6, 150.0, 143.8 (d, *J* = 18.2 Hz), 130.7, 129.3 (d, *J* = 7.8 Hz), 125.6, 124.7 (d, *J* = 1.5 Hz), 119.9, 100.4 (d, *J* = 152.4 Hz), 64.1, 24.4, 15.0, 12.8 (d, *J* = 1.8 Hz).

**<sup>19</sup>F NMR** (471 MHz, acetone-*d*<sub>6</sub>) δ -165.1,

**HRMS (+ESI)**: calcd for C<sub>19</sub>H<sub>20</sub>N<sub>2</sub>O<sub>4</sub>F [M+H]<sup>+</sup> 359.1414, found 359.1413.

**mp**: 69–70 °C.

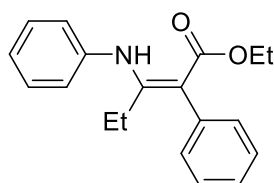

Prepared by adaptation of a literature procedure.<sup>5</sup> To an oven-dried microwave vial were added ethyl (Z)-2-(4-nitrophenyl)-3-(phenylamino)pent-2-enoate (0.2 mmol, 1.0 equiv.), Pd(OAc)<sub>2</sub> (5 mol%), Brettphos (10 mol%) and K<sub>3</sub>PO<sub>4</sub> (2.5 equiv.). The vial was sealed by a cap and placed on the Schlenk line to evacuate and backfill with N<sub>2</sub> three times. Then 1,4-dioxane (1.5 mL) and isopropanol (1.5 equiv.) were added by syringe. The mixture was stirred at 130 °C for overnight. After cooling to room temperature, the reaction was filtered through celite and concentrated. The residue was purified by column chromatography on silica gel to yield the titled compound as colourless oil (44.0 mg, 75%).

**<sup>1</sup>H NMR** (400 MHz, acetone-*d*<sub>6</sub>) 11.25 (s, 1H), 7.48 – 7.42 (m, 2H), 7.37 (tt, *J* = 7.2, 1.0 Hz, 2H), 7.31 – 7.24 (m, 6H), 4.08 (q, *J* = 7.1 Hz, 2H), 2.31 (q, *J* = 7.5 Hz, 2H), 1.11 (t, *J* = 7.1 Hz, 3H), 0.77 (t, *J* = 7.5 Hz, 3H).

**<sup>13</sup>C NMR** (100 MHz, acetone-*d*<sub>6</sub>) δ 171.7, 164.3, 141.5, 139.9, 133.7, 130.9, 129.4, 127.8, 126.9, 126.9, 101.5, 60.4, 23.8, 15.5, 13.5.

**HRMS (+APCI)**: calcd for C<sub>19</sub>H<sub>22</sub>NO<sub>2</sub> [M+H]<sup>+</sup> 296.1645, found 296.1644.

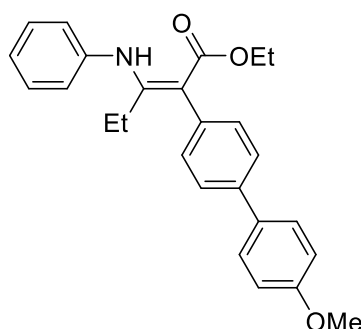

### ethyl (Z)-2-(4'-methoxy-[1,1'-biphenyl]-4-yl)-3-(phenylamino)pent-2-enoate

Prepared by adaptation of a literature procedure.<sup>6</sup> To an oven-dried microwave vial were added ethyl (Z)-2-(4-nitrophenyl)-3-(phenylamino)pent-2-enoate (0.2 mmol, 1.0 equiv.), (4-methoxyphenyl)boronic acid (1.5 equiv.), Pd(OAc)<sub>2</sub> (5 mol%), Brettphos (20 mol%), 18-crown-6 (10 mol%) and K<sub>3</sub>PO<sub>4</sub> (3.0 equiv.). The vial was sealed by a cap and placed on the Schlenk line to evacuate and backfill with N<sub>2</sub> three times. Then 1,4-dioxane (1.0 mL) was added by

syringe. The mixture was stirred at 130 °C for 18 h. After cooling to room temperature, the reaction was filtered through celite and concentrated. The residue was purified by column chromatography on silica gel to yield the titled compound as white solid (49.0 mg, 61%).

**<sup>1</sup>H NMR** (400 MHz, acetone-*d*<sub>6</sub>) 11.28 (s, 1H), 7.68 (d, *J* = 8.8 Hz, 2H), 7.63 (d, *J* = 8.3 Hz, 2H), 7.49 – 7.43 (m, 2H), 7.34 – 7.25 (m, 5H), 7.07 (d, *J* = 8.8 Hz, 2H), 4.11 (q, *J* = 7.1 Hz, 2H), 3.88 (s, 3H), 2.37 (q, *J* = 7.5 Hz, 2H), 1.14 (t, *J* = 7.1 Hz, 3H), 0.80 (t, *J* = 7.5 Hz, 3H).

**<sup>13</sup>C NMR** (100 MHz, acetone-*d*<sub>6</sub>) δ 171.7, 164.5, 161.0, 141.6, 140.0, 138.4, 134.7, 134.2, 130.9, 129.4, 127.4, 127.0, 126.9, 115.9, 101.0, 60.5, 56.4, 23.9, 15.6, 13.5.

**HRMS (+ESI)**: calcd for C<sub>26</sub>H<sub>27</sub>NO<sub>4</sub>Na [M+Na]<sup>+</sup> 424.1883, found 424.1890.

**mp**: 79–80 °C.

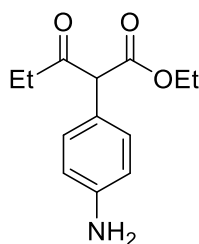

#### ethyl 2-(4-aminophenyl)-3-oxopentanoate

To an oven-dried microwave vial were added ethyl (Z)-2-(4-nitrophenyl)-3-(phenylamino)pent-2-enoate (0.2 mmol, 1.0 equiv.), Fe filings (5.0 equiv.) and NH<sub>4</sub>Cl (2.5 equiv.). The vial was sealed by a cap and then EtOH/H<sub>2</sub>O (v/v = 3:1, 6.4 mL) was added by syringe. The mixture was stirred at 60 °C for 4 h. After cooling to room temperature, the mixture was filtered and concentrated under reduced pressure. Then water and ethyl acetate were added and the phases were separated. The organic phase was washed with brine, dried over anhydrous Na<sub>2</sub>SO<sub>4</sub> and concentrated. The residue was purified by column chromatography on silica gel to yield the titled compound as yellow oil (44.7 mg, 95%).

**<sup>1</sup>H NMR** (400 MHz, acetone-*d*<sub>6</sub>) δ 7.09 (d, *J* = 8.5 Hz, 2H), 6.69 (d, *J* = 8.5 Hz, 2H), 4.74 (d, *J* = 7.2 Hz, 3H), 4.17 (qd, *J* = 7.1, 1.8 Hz, 2H), 2.53 (q, *J* = 7.3 Hz, 2H), 1.24 (t, *J* = 7.1 Hz, 3H), 0.97 (t, *J* = 7.3 Hz, 3H).

**<sup>13</sup>C NMR** (100 MHz, acetone-*d*<sub>6</sub>) δ 206.2, 170.7, 149.9, 131.8, 122.9, 115.9, 65.1, 62.1, 35.6, 15.2, 8.9.

**HRMS (+ESI)**: calcd for C<sub>13</sub>H<sub>17</sub>NO<sub>3</sub>Na [M+Na]<sup>+</sup> 258.1101, found 258.1104.

## 4. References

- 1) J. Corpas, M. Gomez-Mendoza, J. Ramírez-Cárdenas, V. A. de la P. O'Shea, P. Mauleón, R. G. Arrayás, J. C. Carretero, *J. Am. Chem. Soc.*, **2022**, *144*, 13006.
- 2) Z. He, H. Li and Z. Li, *J. Org. Chem.*, **2010**, *75*, 4636.
- 3) A. M. Salaheldin and M. A. Al-Sheikh, *Molecules*, **2010**, *15*, 4359.
- 4) Y.-Q. Deng, M.-Z. Gu, G.-S. Chen, X.-Y. Li, Y.-L. Zheng, Q.-M. Yang and Y.-L. Liu, *Org. Chem. Front.*, **2023**, *10*, 4010.
- 5) M. Kashihara, M. R. Yadav and Y. Nakao, *Org. Lett.*, **2018**, *20*, 1655.
- 6) M. R. Yadav, M. Nagaoka, M. Kashihara, R.-L. Zhong, T. Miyazaki, S. Sakaki and Y. Nakao, *J. Am. Chem. Soc.*, **2017**, *139*, 9423.

## 5. X-ray crystallography of 17a

**Data collection:** X-ray diffraction data for compound **17a** was collected on Agilent Supernova diffractometer using MoK $\alpha$  ( $\lambda = 0.71073\text{\AA}$ ) radiation, equipped with CCD plate detector and an Agilent Crysosystem nitrogen flow gas system, at a temperature of 100K. Data were collected and reduced using CrysAlisPro v42.<sup>REF1</sup> Absorption correction was performed using empirical methods (SCALE3 ABSPACK) based upon symmetry-equivalent reflections combined with measurements at different azimuthal angles.

**Crystal structure determination and refinements:** The crystal structure was solved and refined against all  $F^2$  values using the SHELX and Olex2 suite of programmes.<sup>REF2</sup> Coordinates for all non-hydrogen atoms were freely refined and atomic displacement parameters were freely refined anisotropically. Isotropic thermal parameters were allowed to freely refine. Hydrogen atoms were refined using idealised geometries (riding model) and assigned fixed isotropic displacement parameters.

The structure presented with a disorder ethoxy group in one of the molecules. This was modelled as a two-component disorder, refined so that the sum of the occupancies is equal to 1. Similar 1,2- bond distance, atomic displacement parameters and rigid bond restraints were applied on the disordered part of ethoxy group.

Crystallographic data for X have been deposited in Cambridge Crystallographic Data Centre, with deposition number CCDC 2342281. This data can be obtained free of charge via [www.ccdc.cam.ac.uk/conts/retrieving.html](http://www.ccdc.cam.ac.uk/conts/retrieving.html) (or from the Cambridge Crystallographic Data Centre, 12 Union Road, Cambridge CB21EZ, UK; fax: (+44)1223-336-033; or [deposit@ccdc.cam.ac.uk](mailto:deposit@ccdc.cam.ac.uk)).

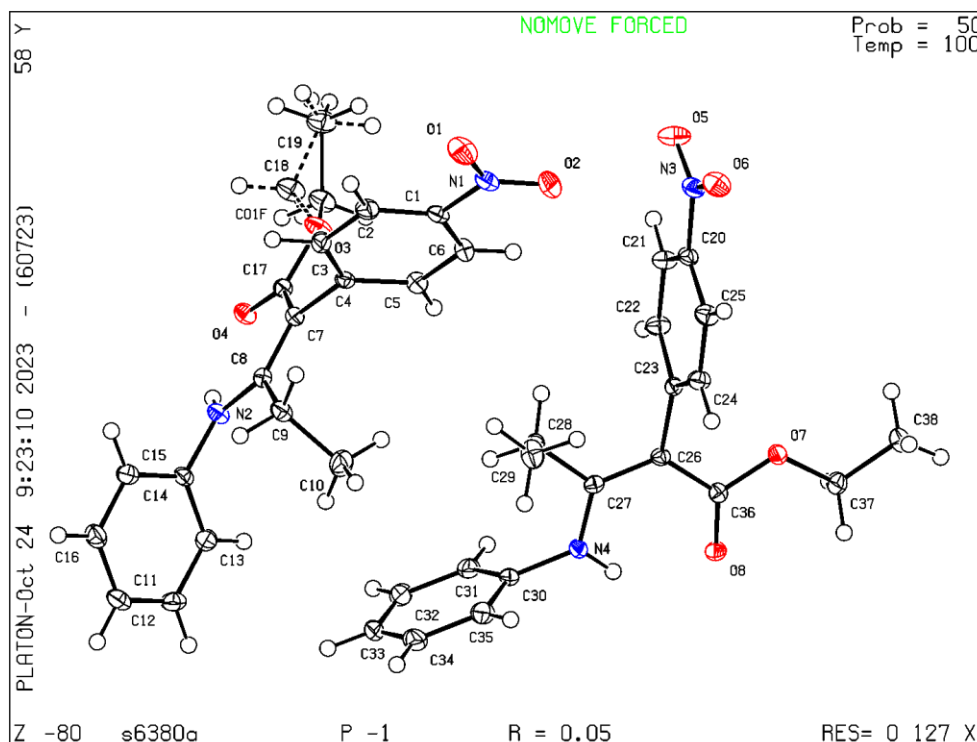

Download CIF editor (publCIF) from the IUCr  
Download CIF editor (enCIFer) from the CCDC  
Test a new CIF entry

Table S1. Crystallographic information for sample **17a**

|                                                |                                                                 |
|------------------------------------------------|-----------------------------------------------------------------|
| Identification code                            | <b>17a</b>                                                      |
| Empirical formula                              | $C_{19}H_{20}N_2O_4$                                            |
| Formula weight                                 | 340.37                                                          |
| Temperature/K                                  | 99.7(7)                                                         |
| Crystal system                                 | triclinic                                                       |
| Space group                                    | P-1                                                             |
| a/Å                                            | 8.1324(3)                                                       |
| b/Å                                            | 11.0134(5)                                                      |
| c/Å                                            | 20.2400(8)                                                      |
| $\alpha/^\circ$                                | 77.534(4)                                                       |
| $\beta/^\circ$                                 | 79.396(4)                                                       |
| $\gamma/^\circ$                                | 80.934(4)                                                       |
| Volume/Å <sup>3</sup>                          | 1726.67(13)                                                     |
| Z                                              | 4                                                               |
| $\rho_{\text{calc}}/\text{g cm}^{-3}$          | 1.309                                                           |
| $\mu/\text{mm}^{-1}$                           | 0.093                                                           |
| F(000)                                         | 720                                                             |
| Crystal size/mm <sup>3</sup>                   | 0.19 × 0.17 × 0.1                                               |
| Radiation                                      | Mo K $\alpha$ ( $\lambda$ = 0.71073)                            |
| 2 $\Theta$ range for data collection/ $^\circ$ | 6.676 to 63.176                                                 |
| Index ranges                                   | -11 ≤ h ≤ 11, -16 ≤ k ≤ 16, -29 ≤ l ≤ 29                        |
| Reflections collected                          | 60067                                                           |
| Independent reflections                        | 10899 [ $R_{\text{int}}$ = 0.0639, $R_{\text{sigma}}$ = 0.0474] |
| Data/restraints/parameters                     | 10899/25/473                                                    |
| Goodness-of-fit on $F^2$                       | 1.032                                                           |
| Final R indexes [ $ I  \geq 2\sigma(I)$ ]      | $R_1$ = 0.0514, $wR_2$ = 0.1119                                 |
| Final R indexes [all data]                     | $R_1$ = 0.0723, $wR_2$ = 0.1232                                 |
| Largest diff. peak/hole / e Å <sup>-3</sup>    | 0.380/-0.313                                                    |

REF1. Rigaku Oxford Diffraction, (2024), CrysAlisPro Software system, version 1.171.42a, Rigaku Corporation, Wroclaw, Poland

REF2. a) G. M. Sheldrick, Acta. Cryst. 2015, A71, 3–8; b) G. M. Sheldrick, Acta. Cryst. 2015, C71, 3–8; c) O. V. Dolomanov, L. J. Bourhis, R. J. Gildea, J. A. K. Howard, H. Puschmann, J. Appl. Cryst. 2009, 42, 339–341.

## 6. NMR spectra

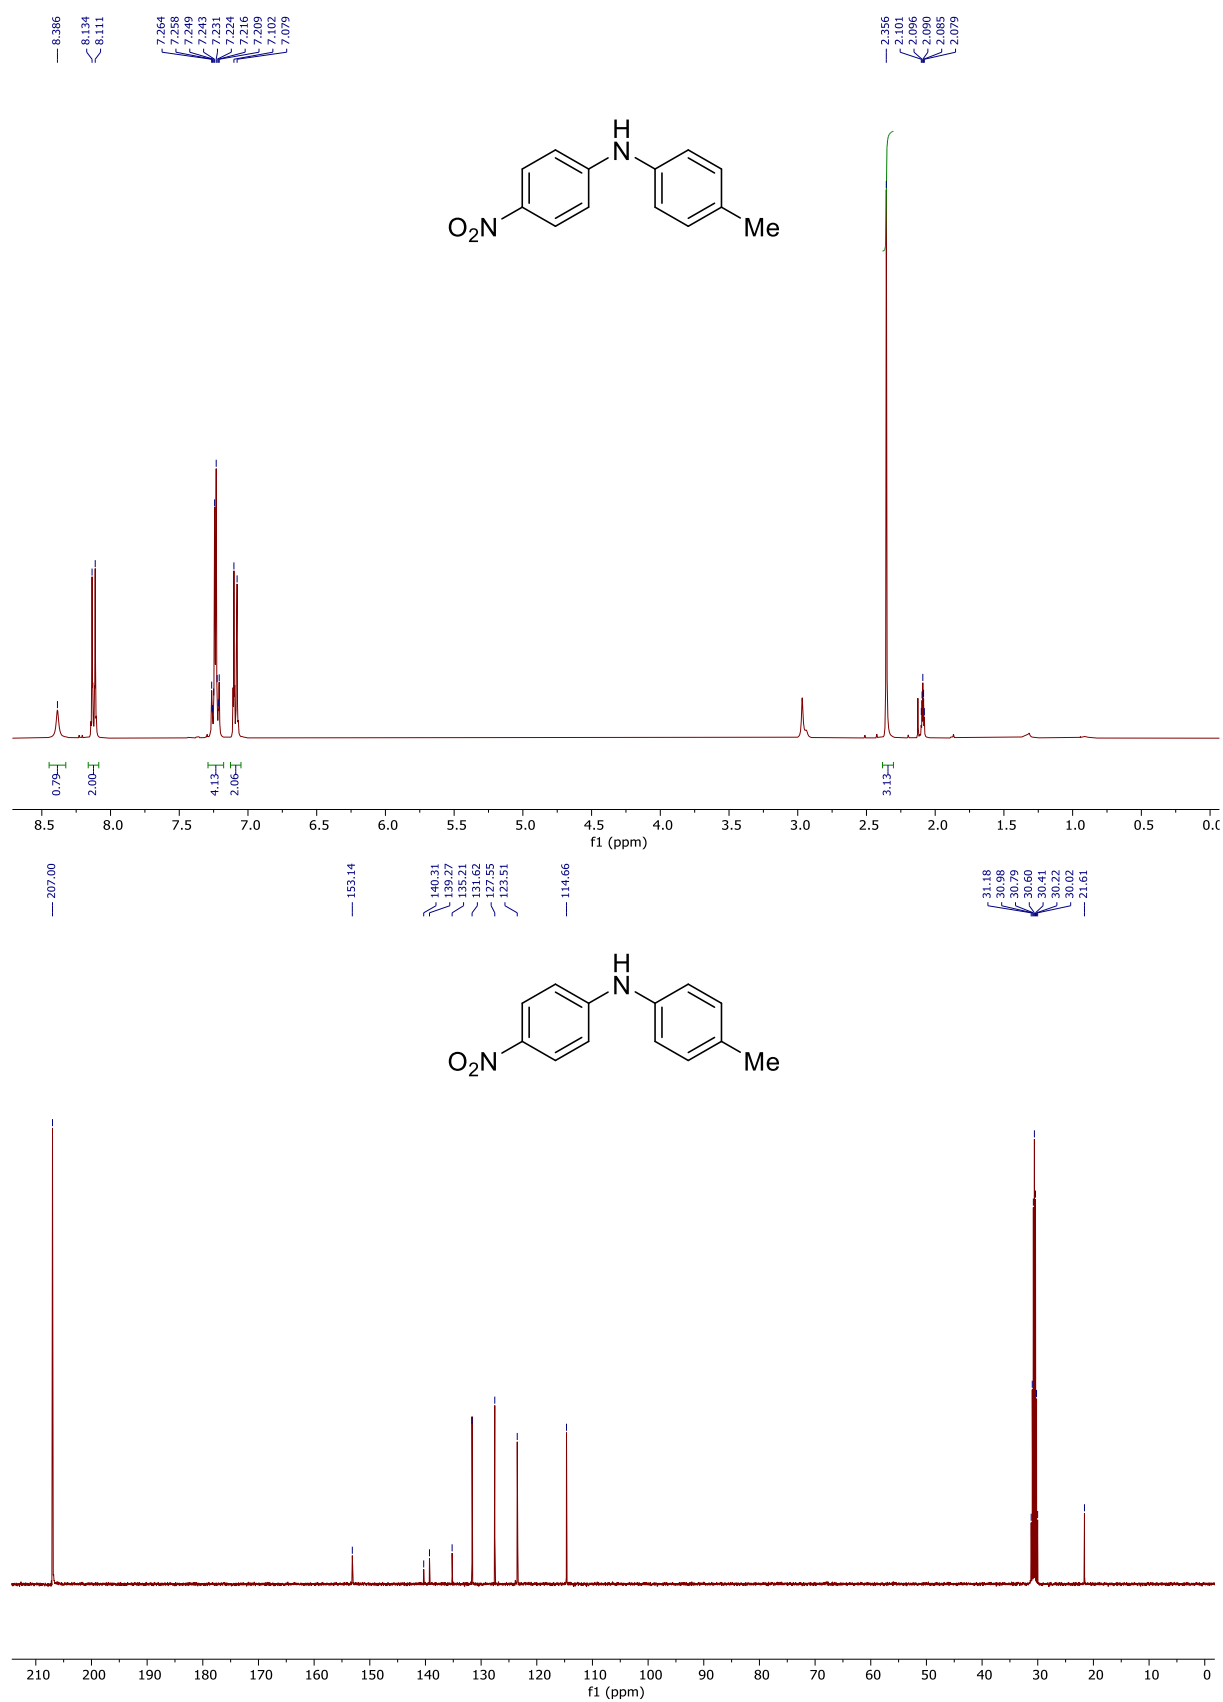



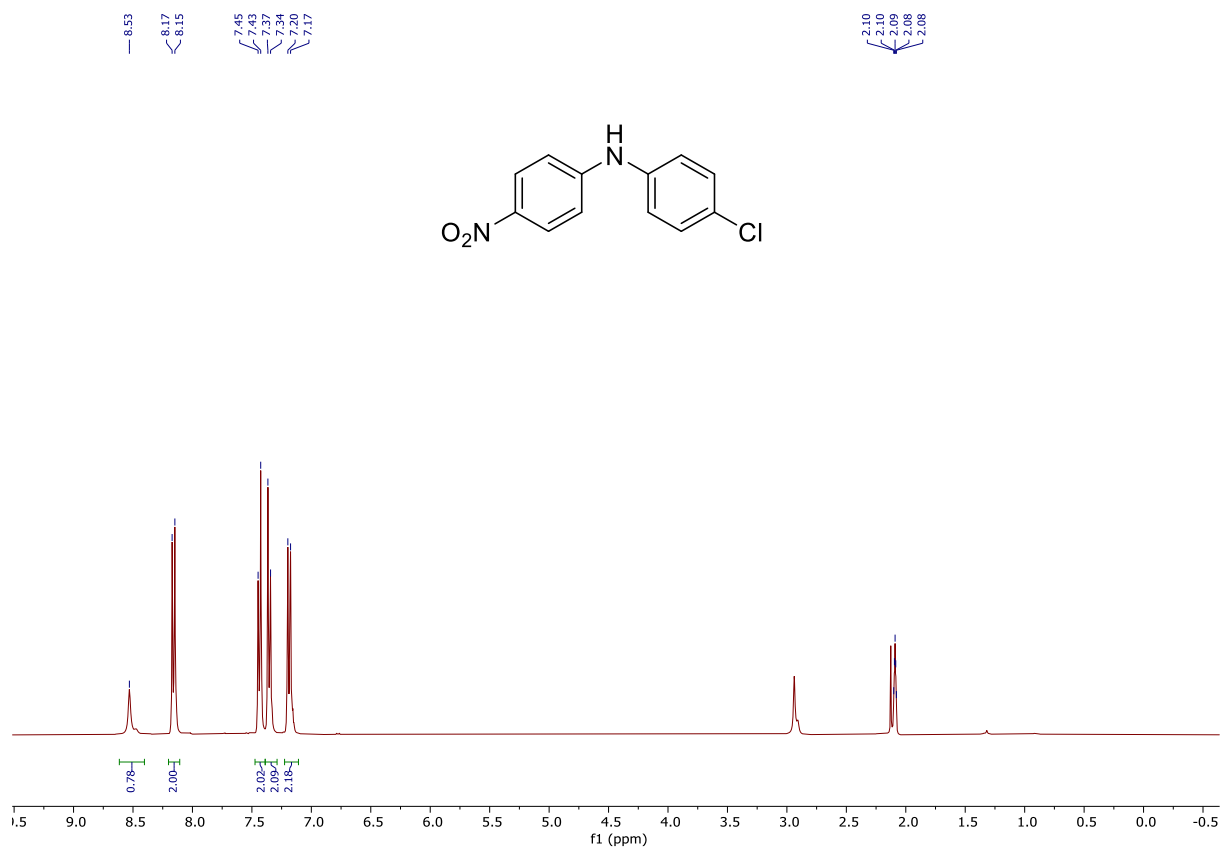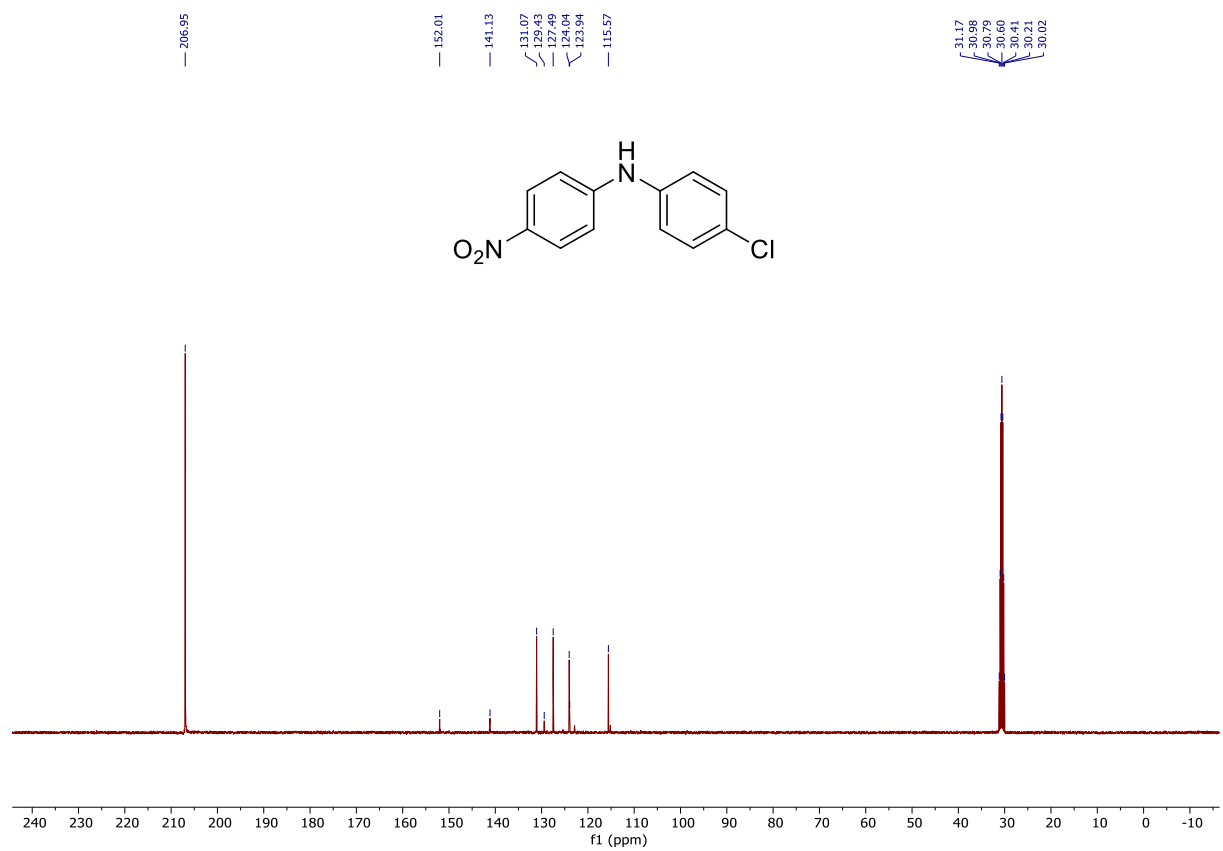

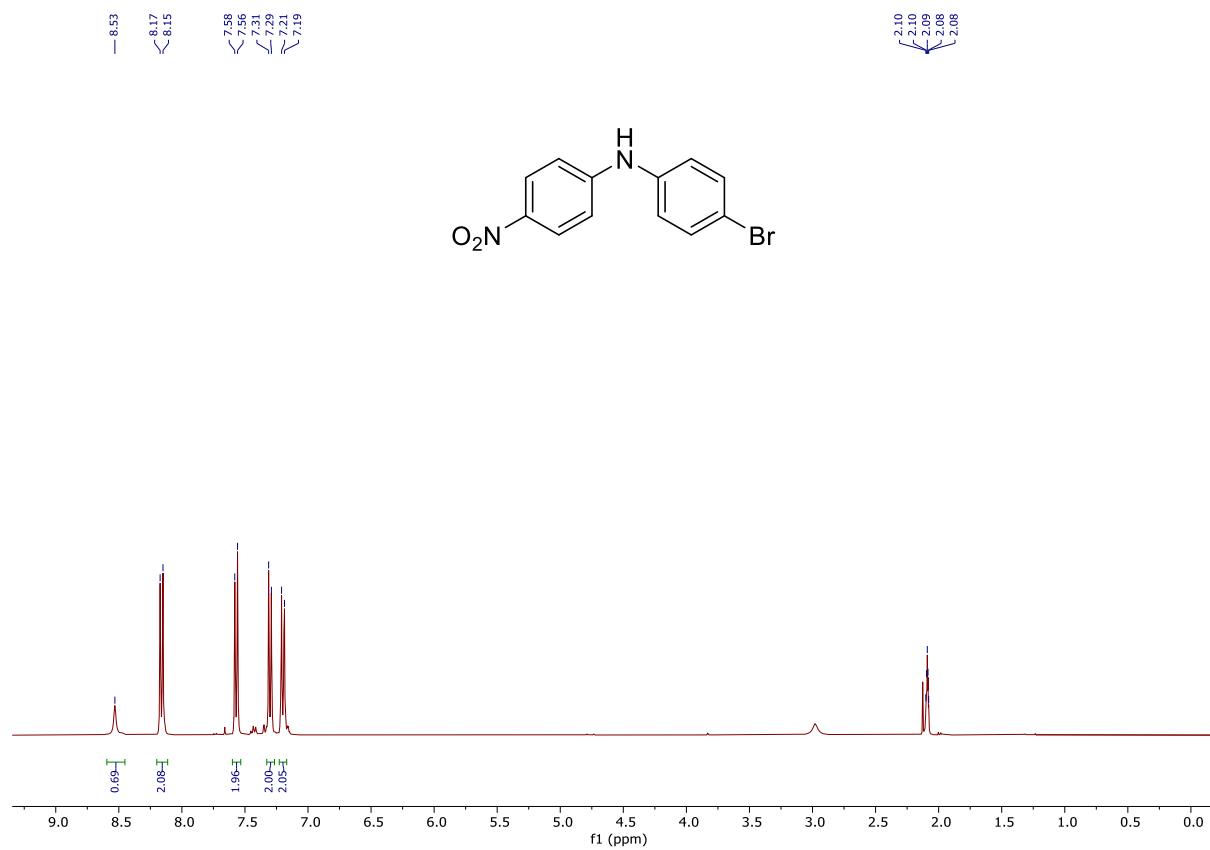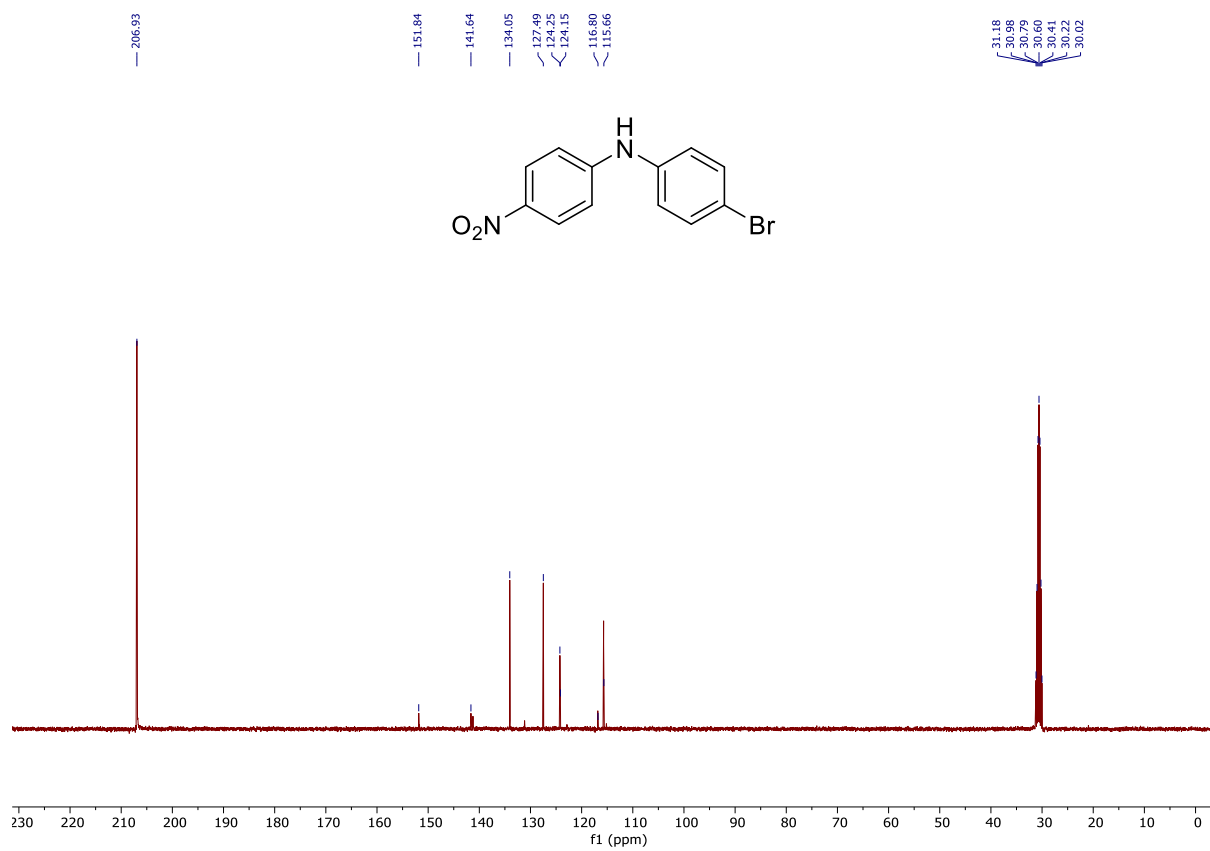

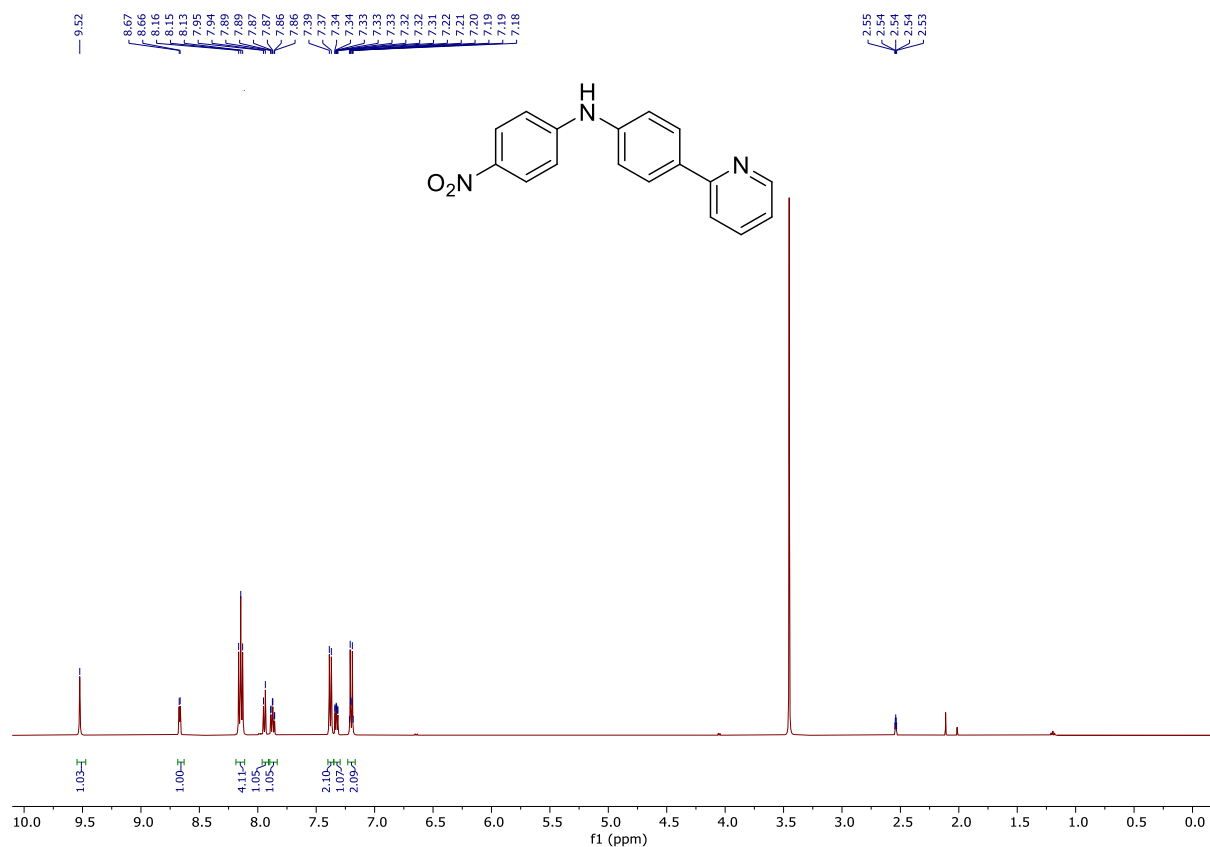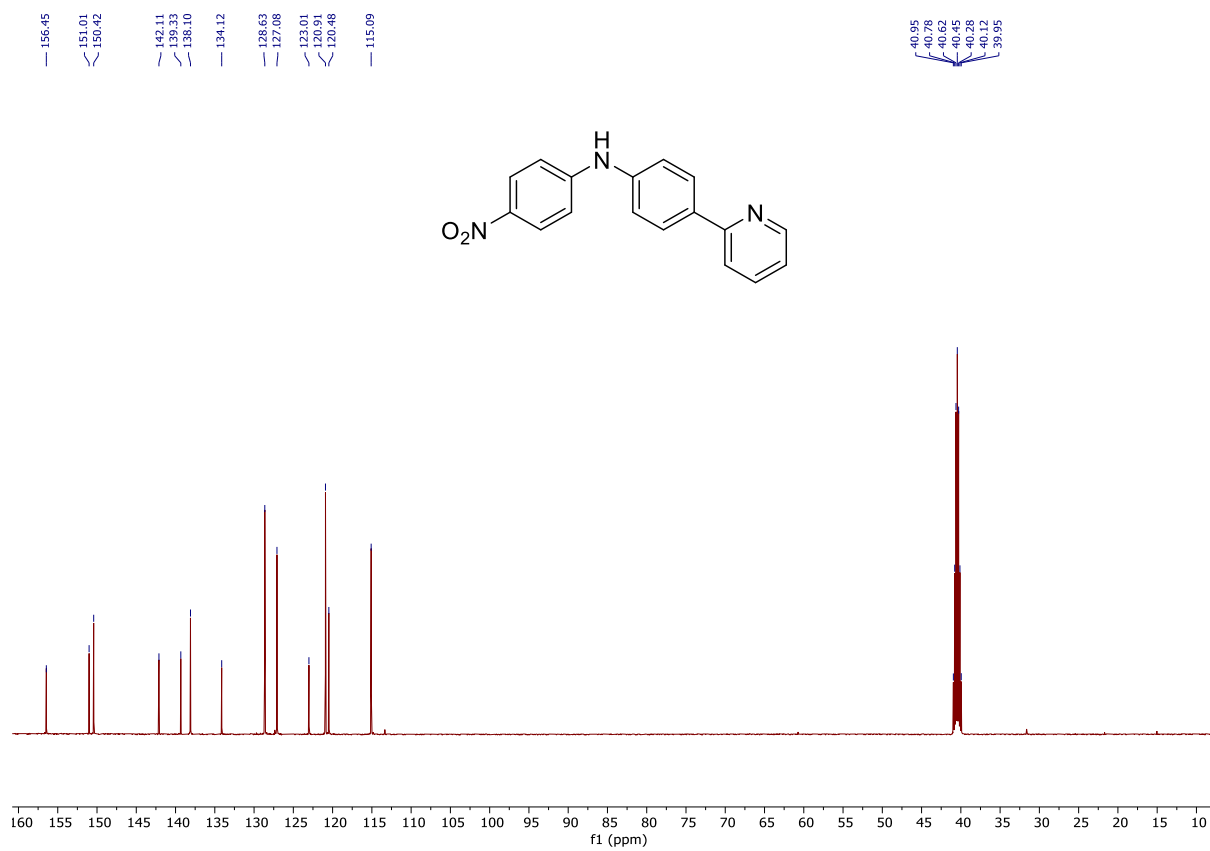

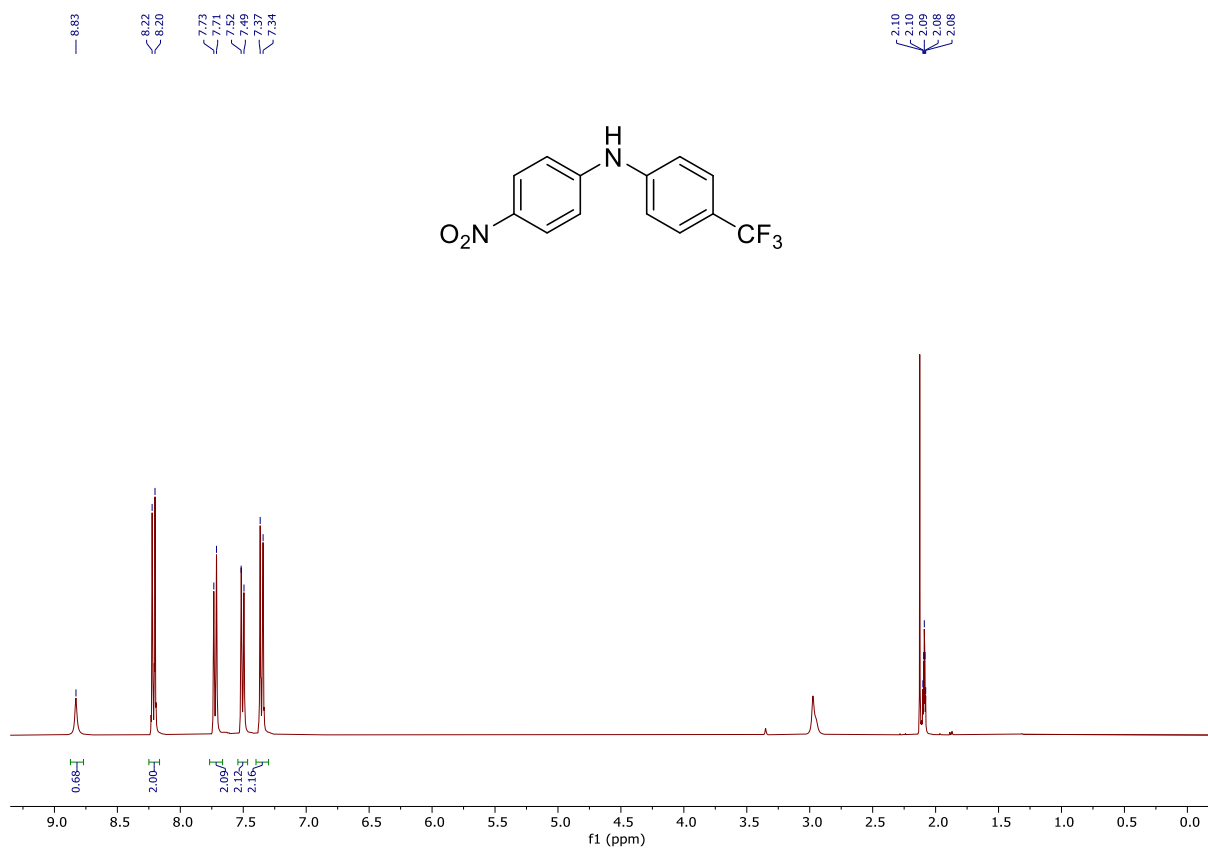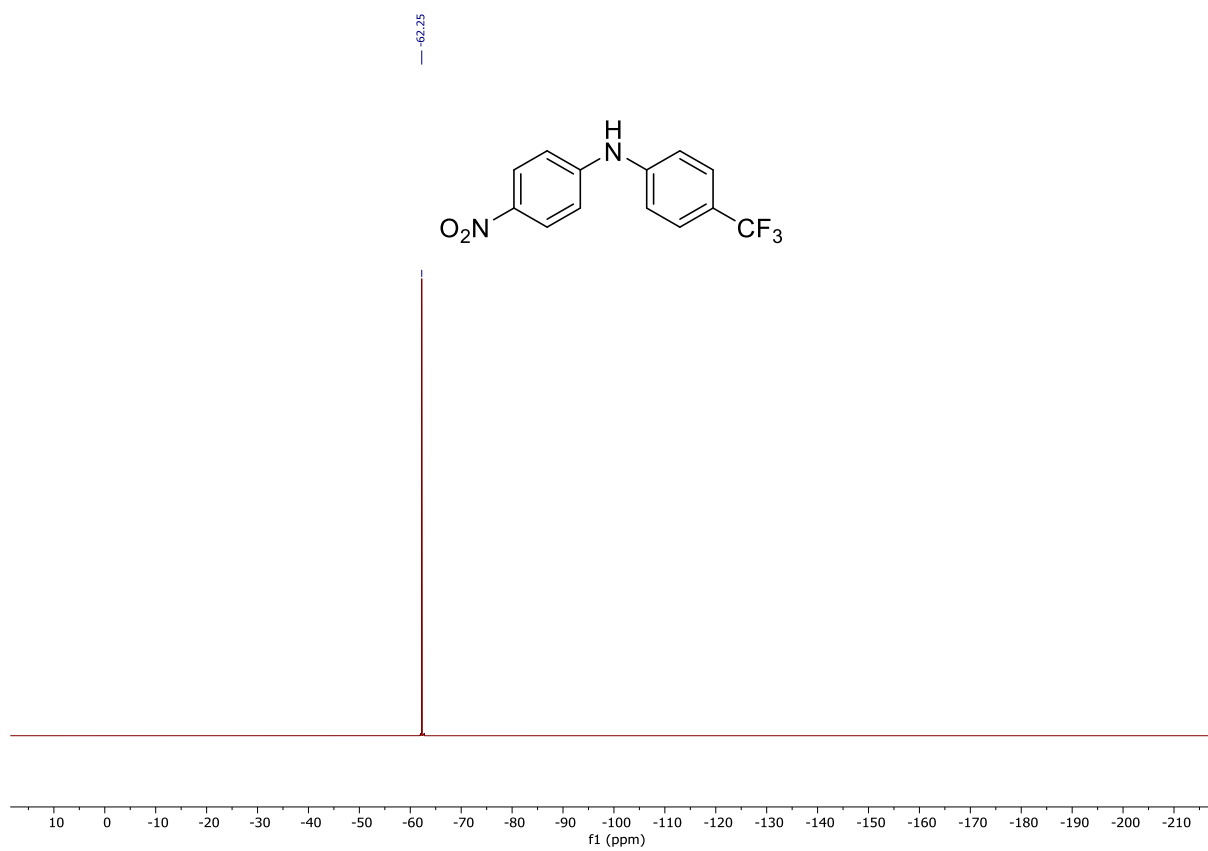

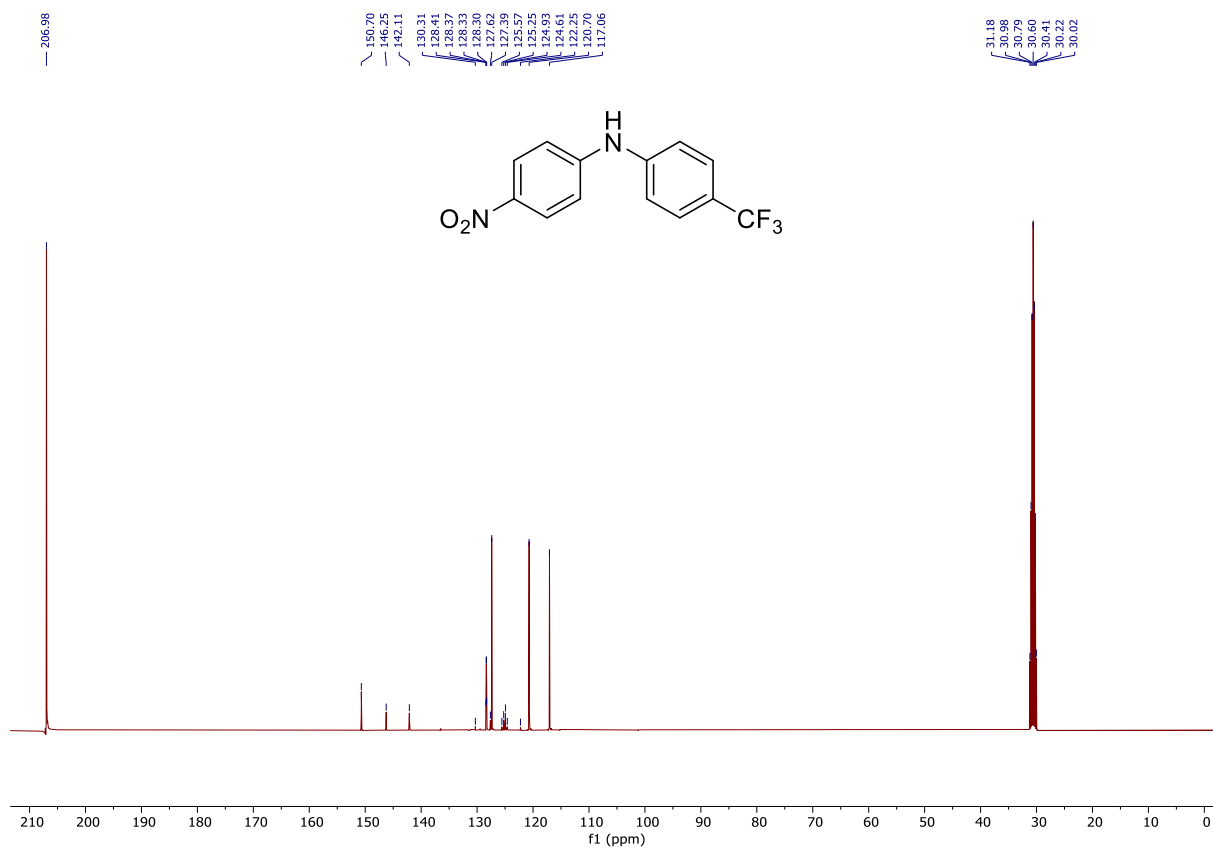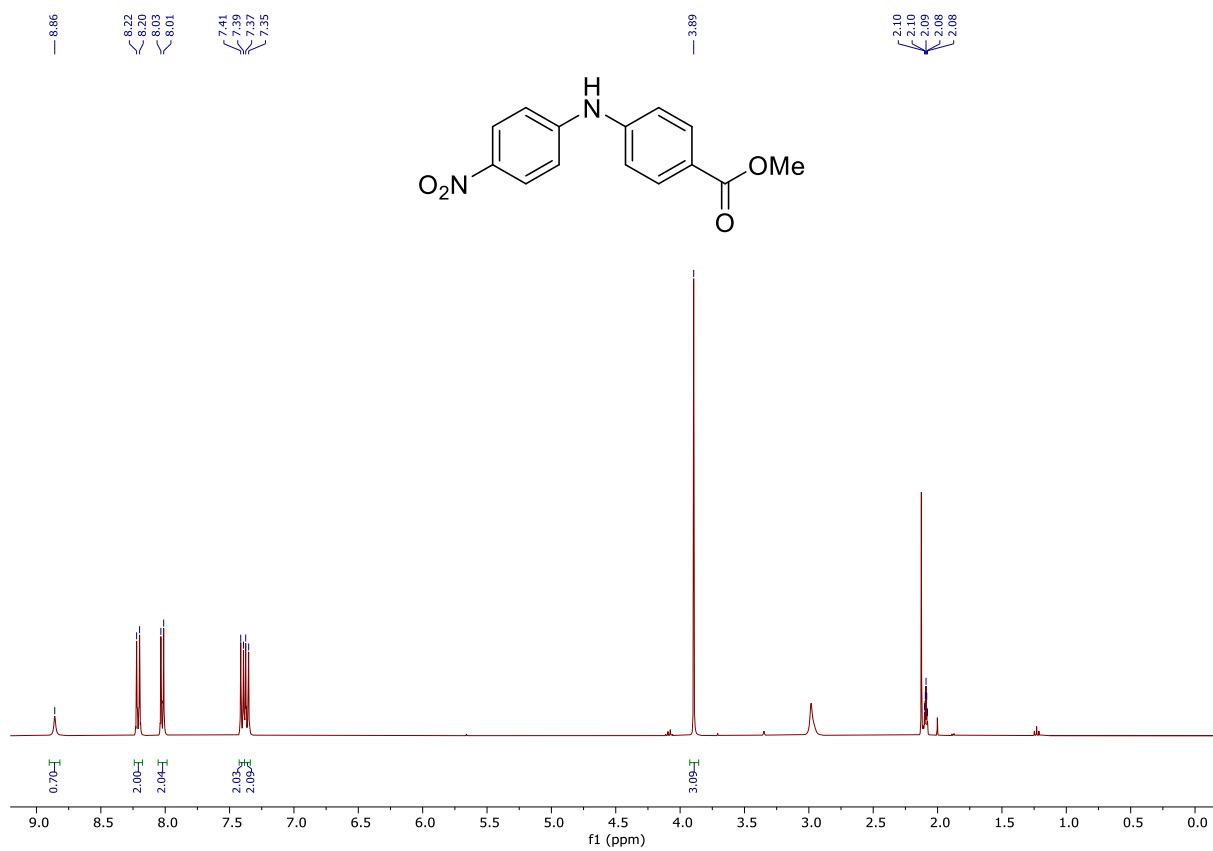

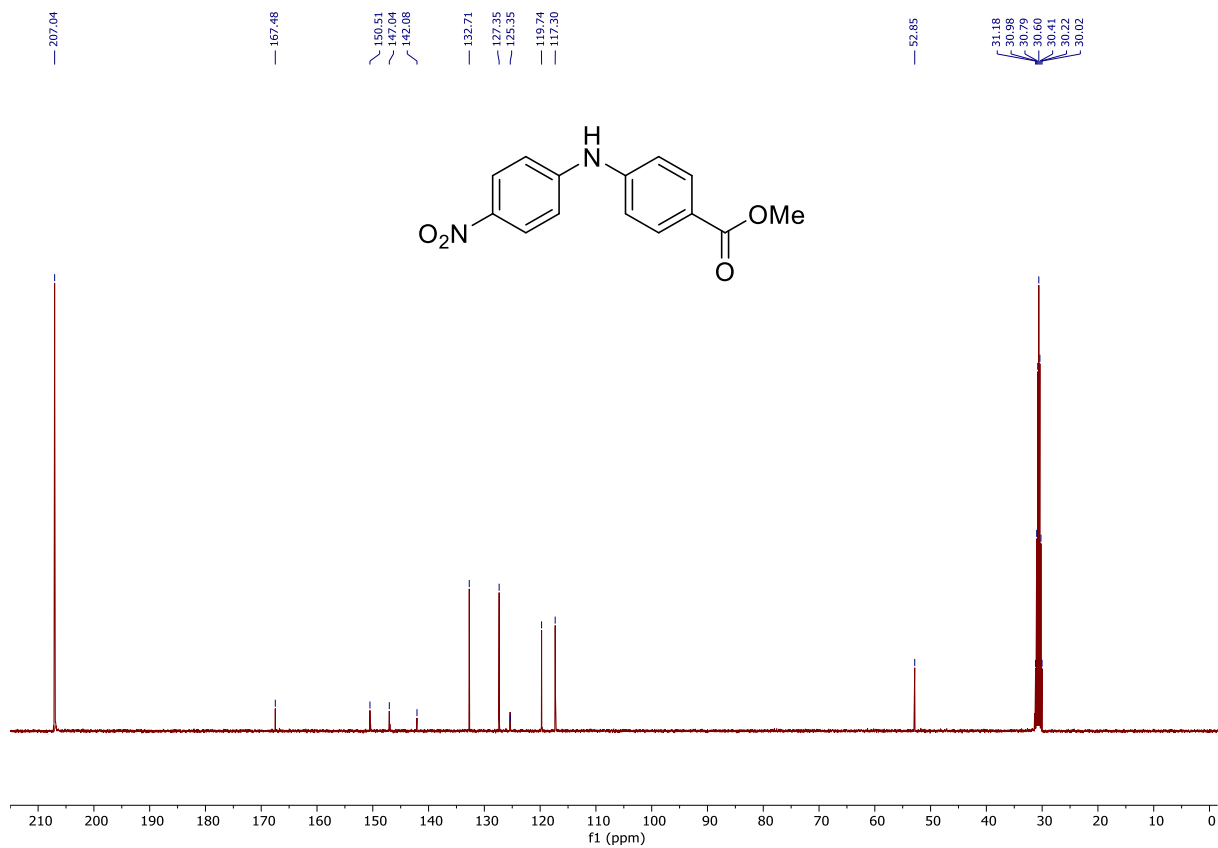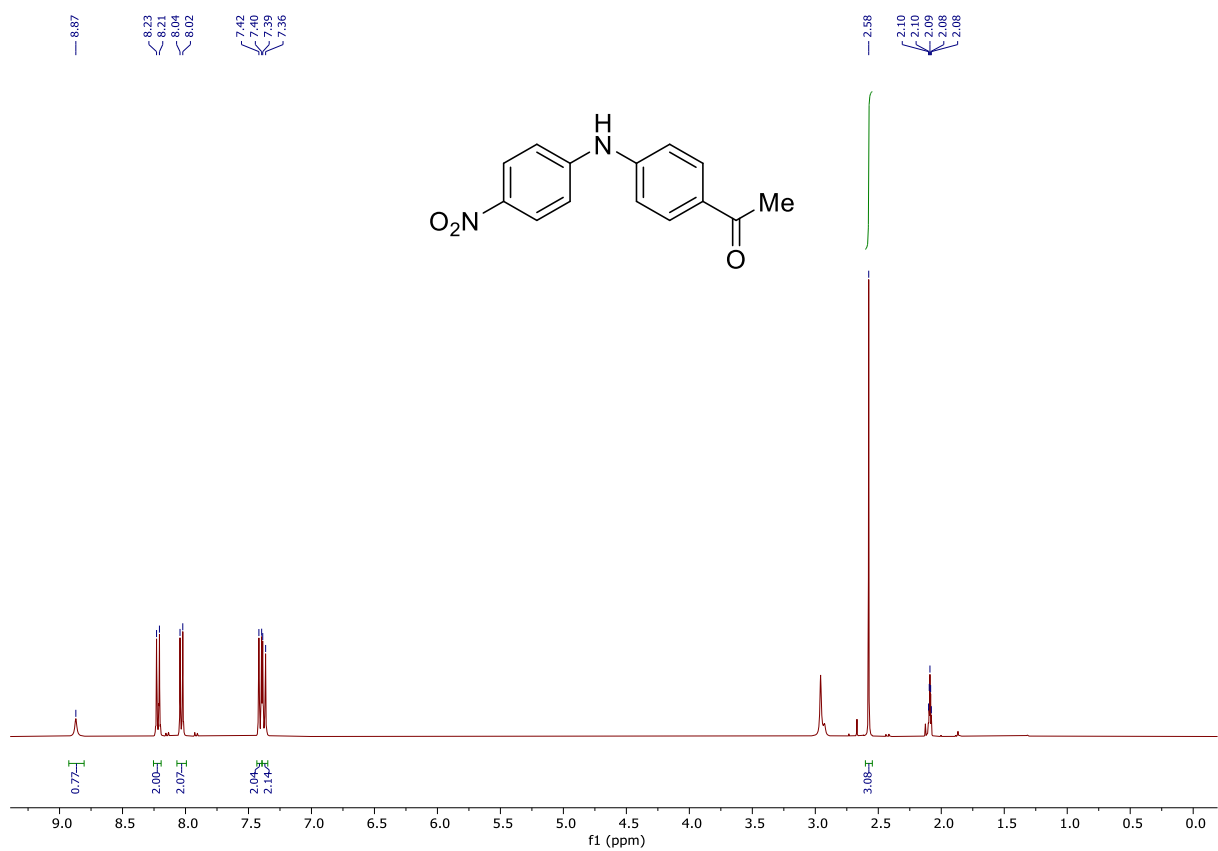

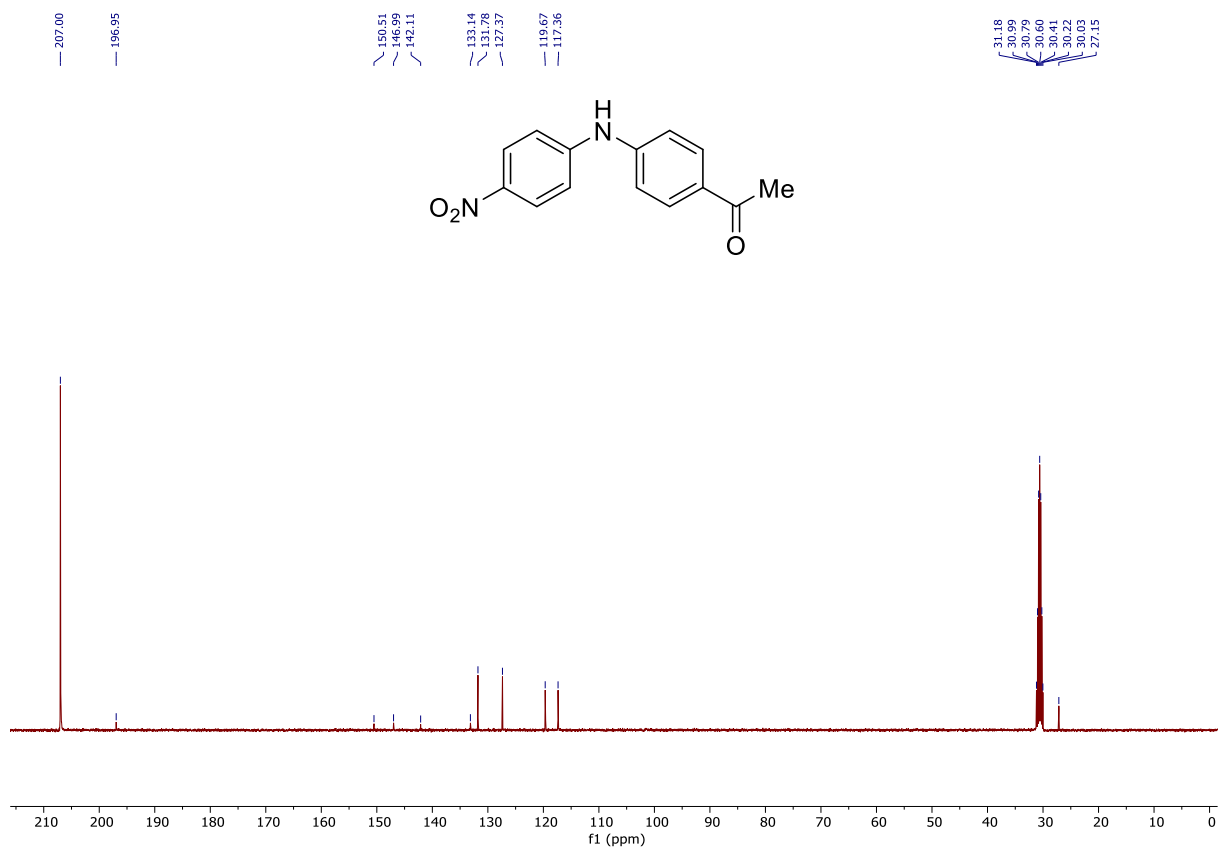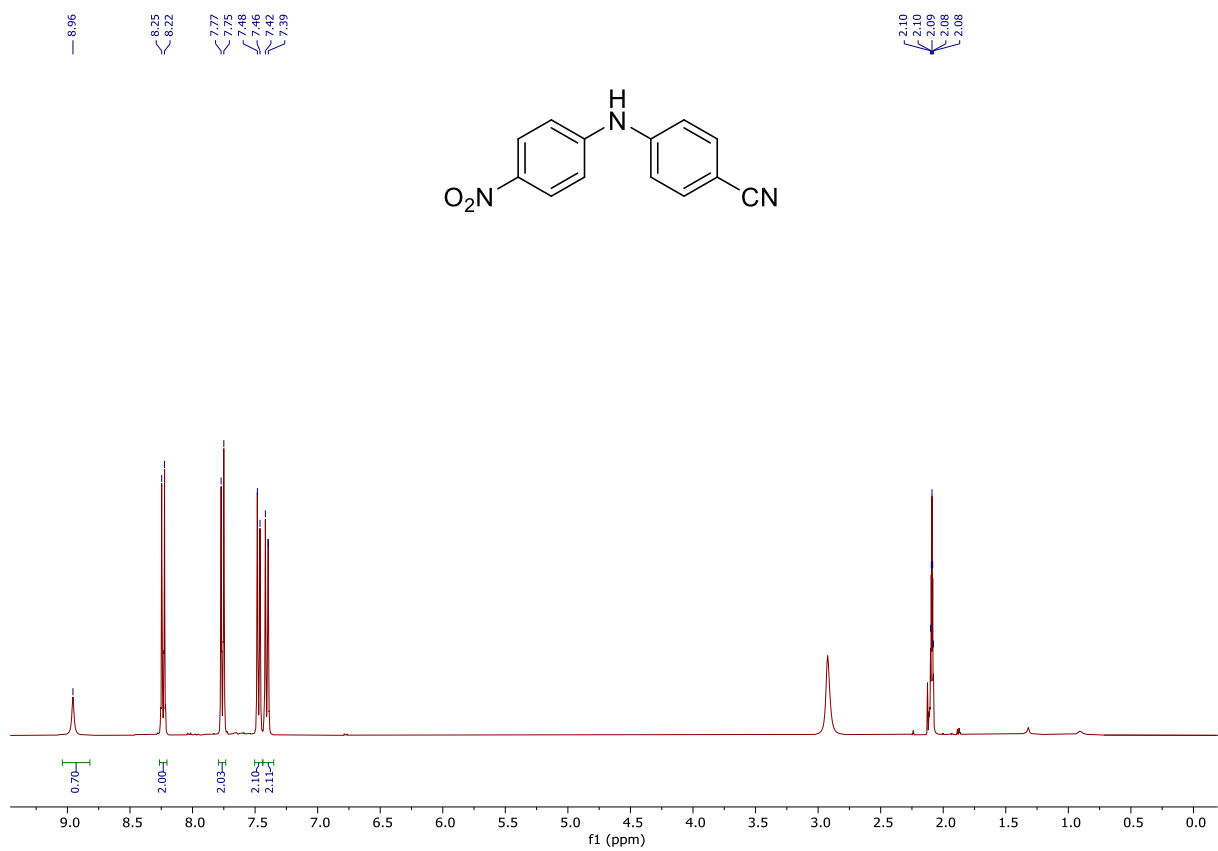





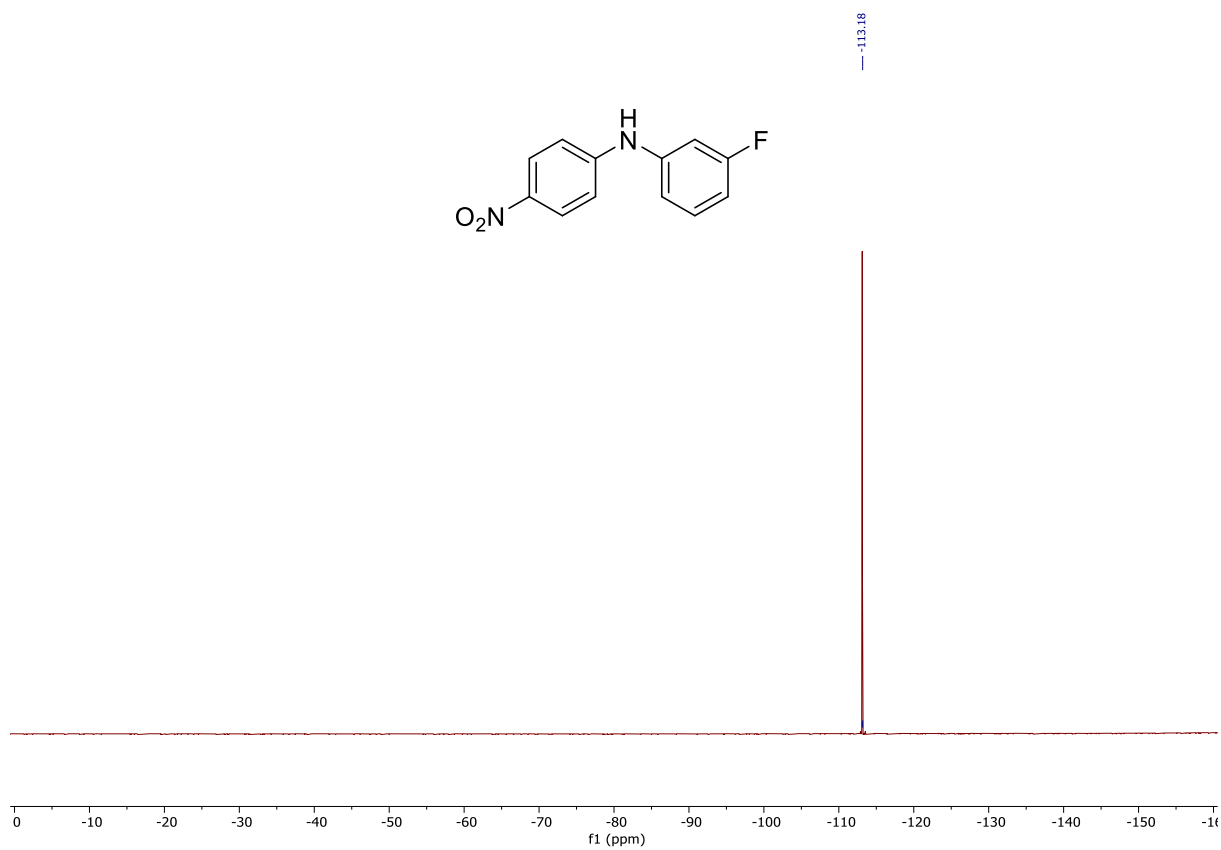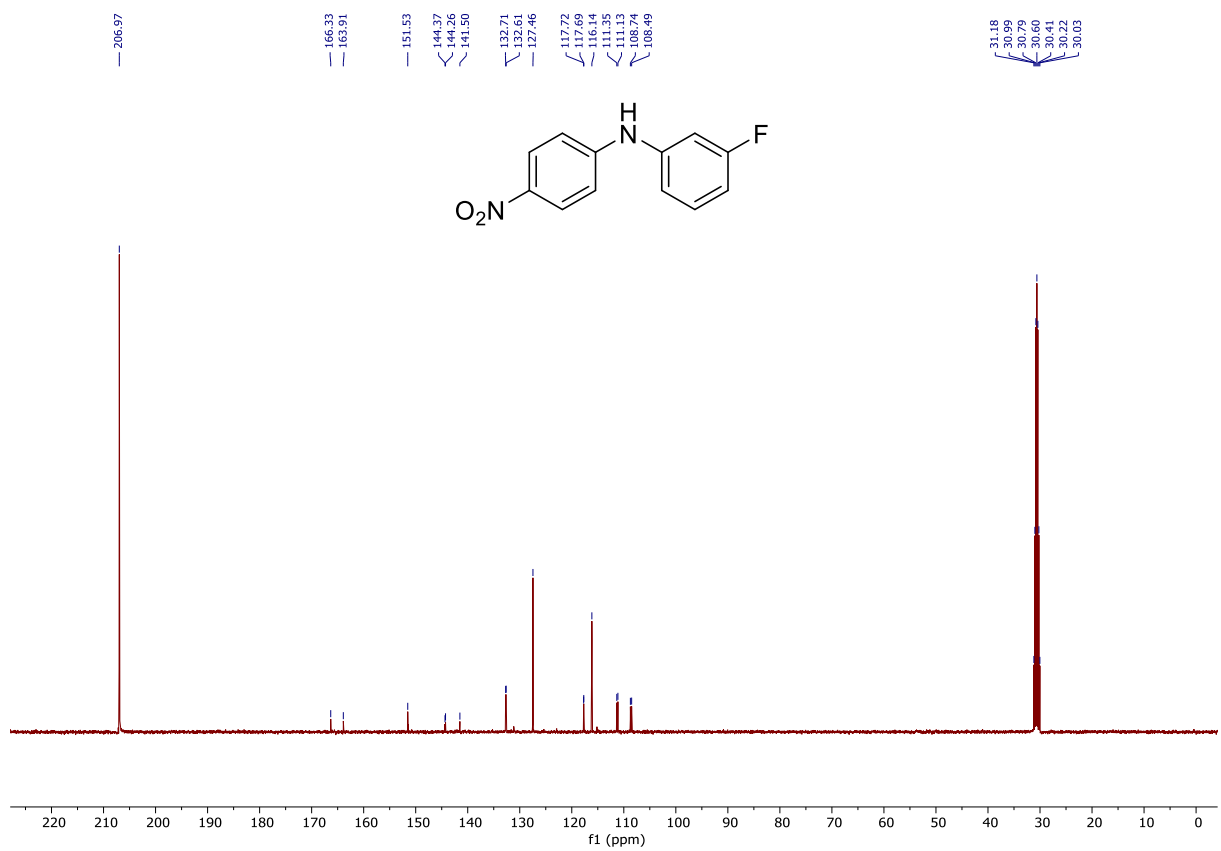

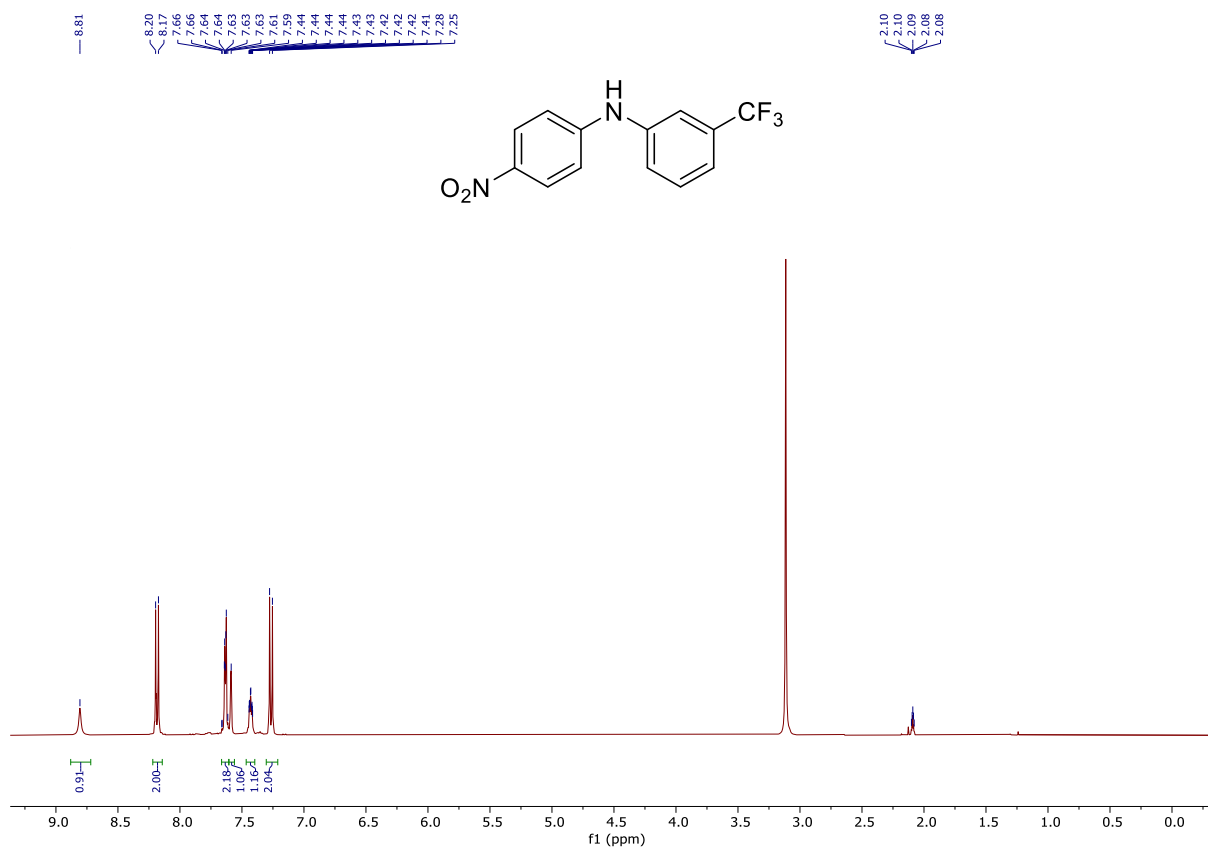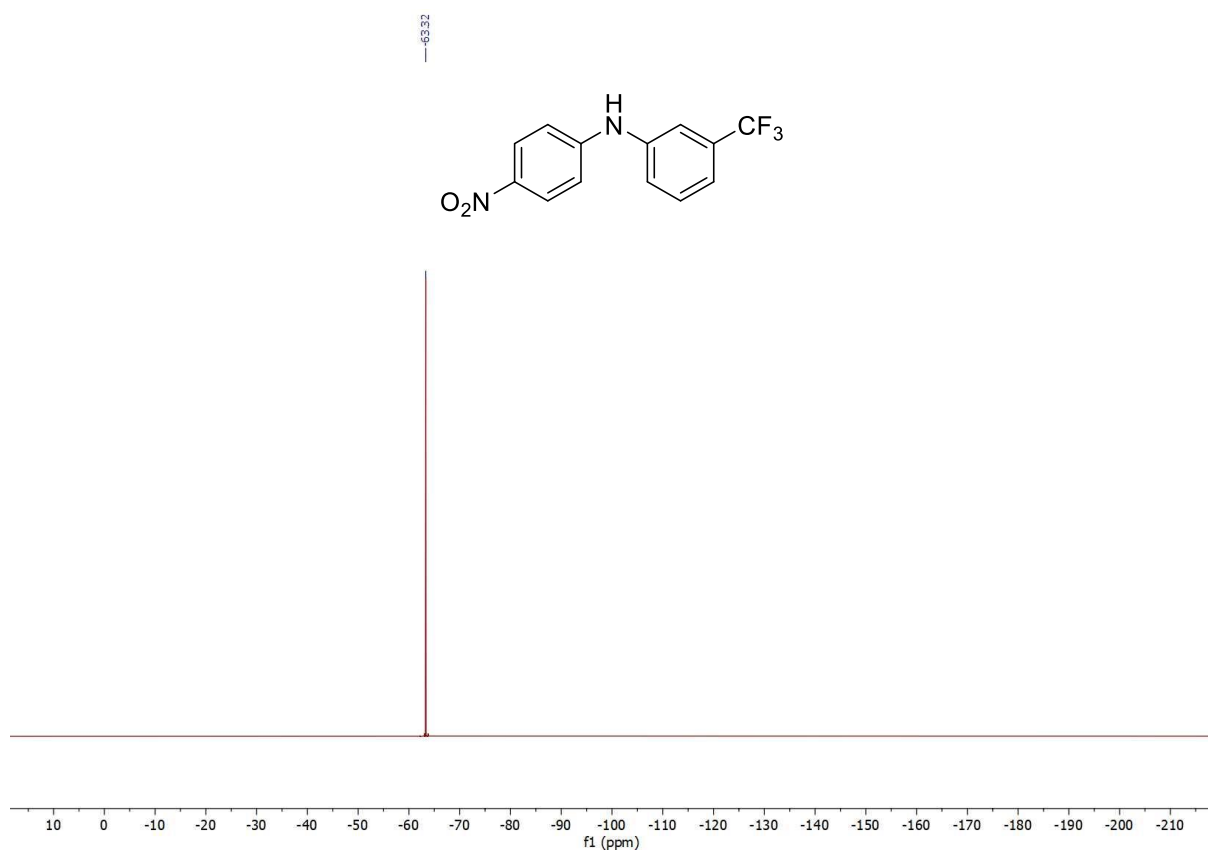

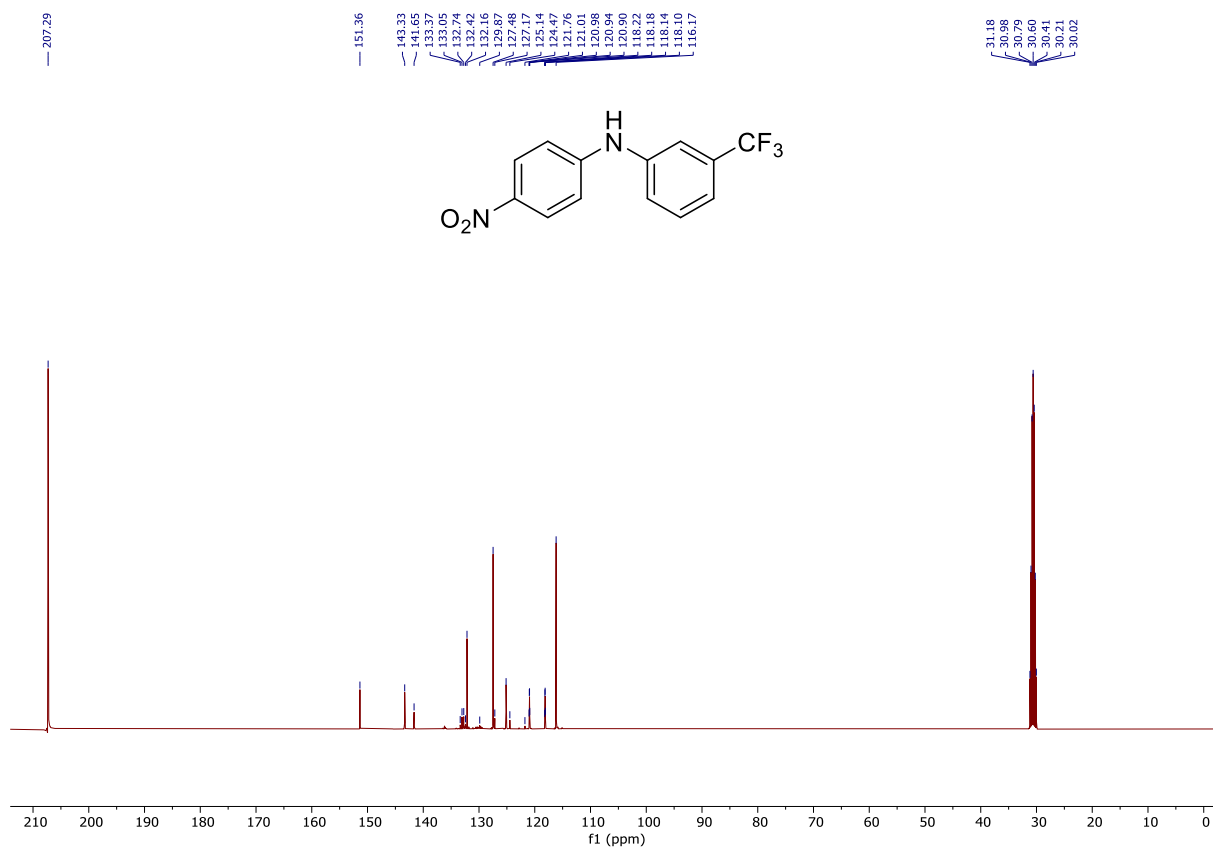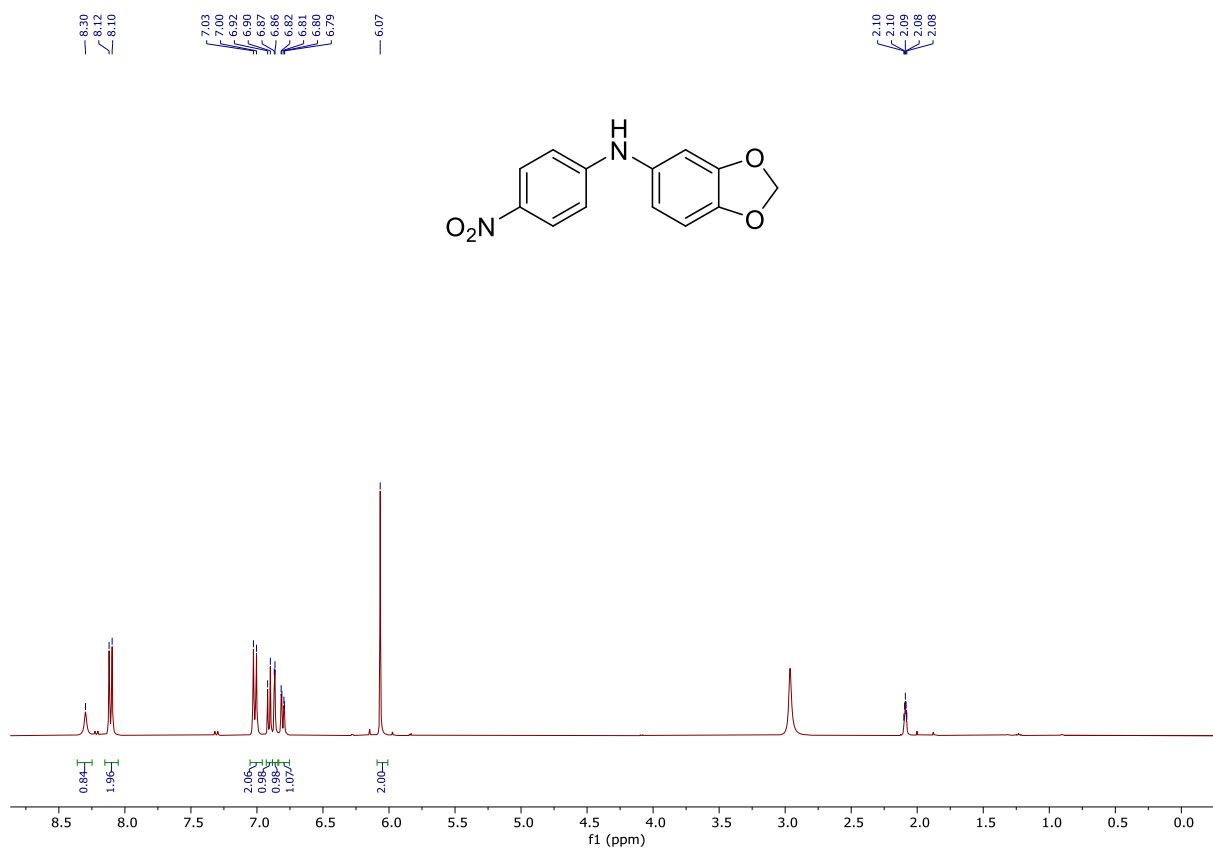

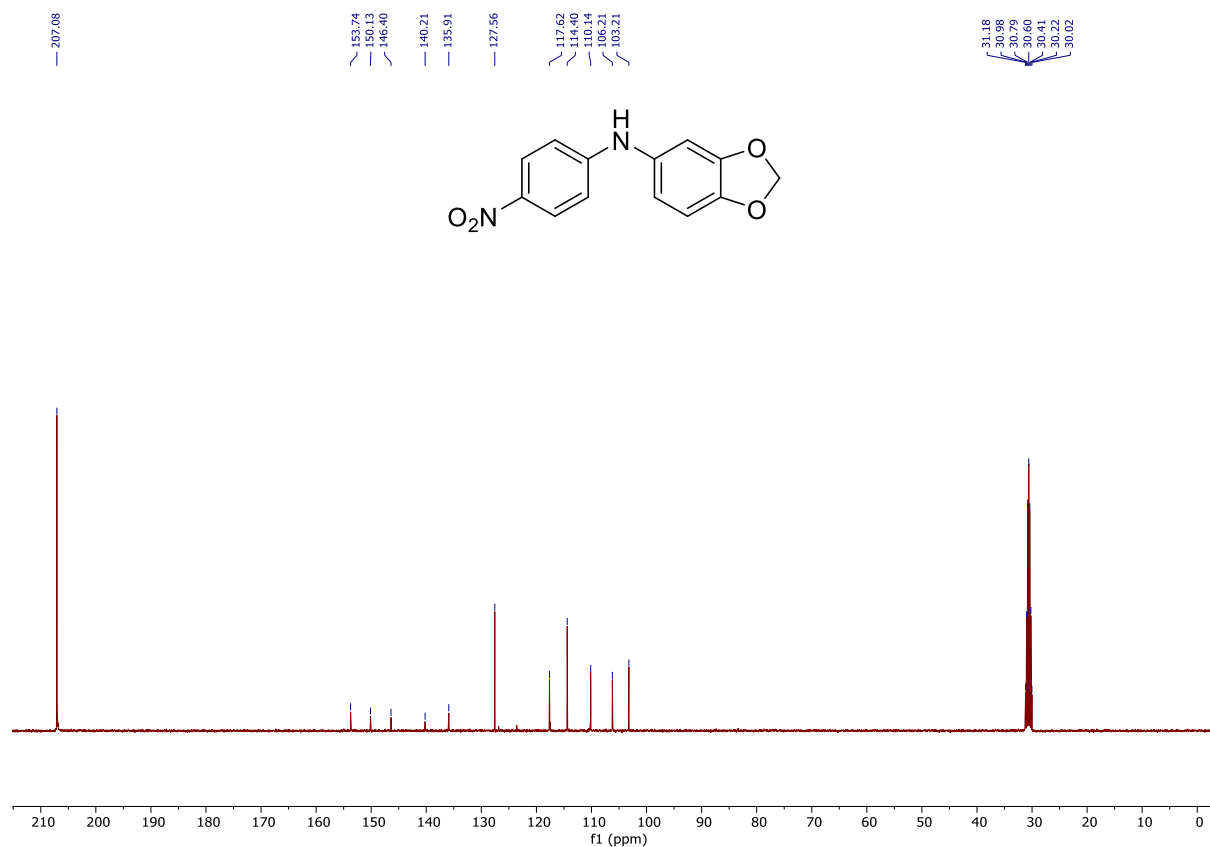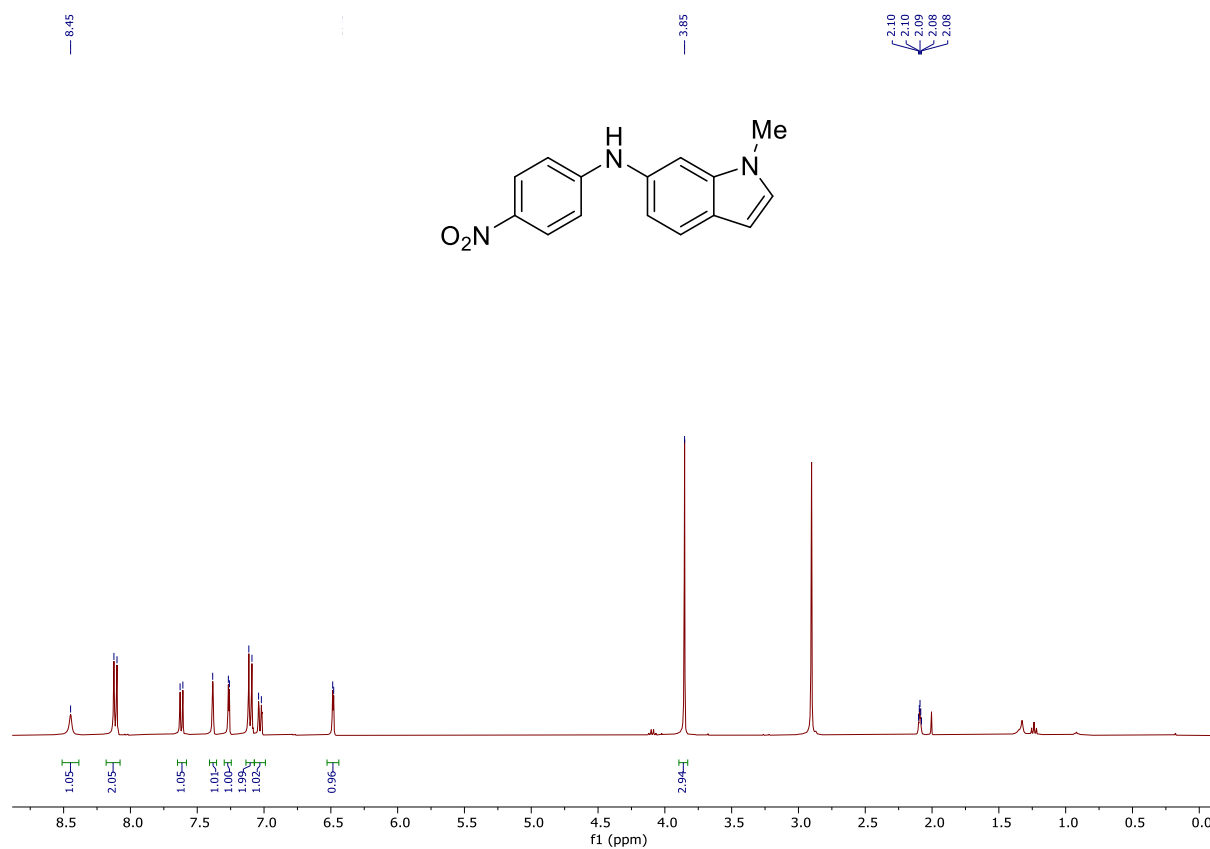

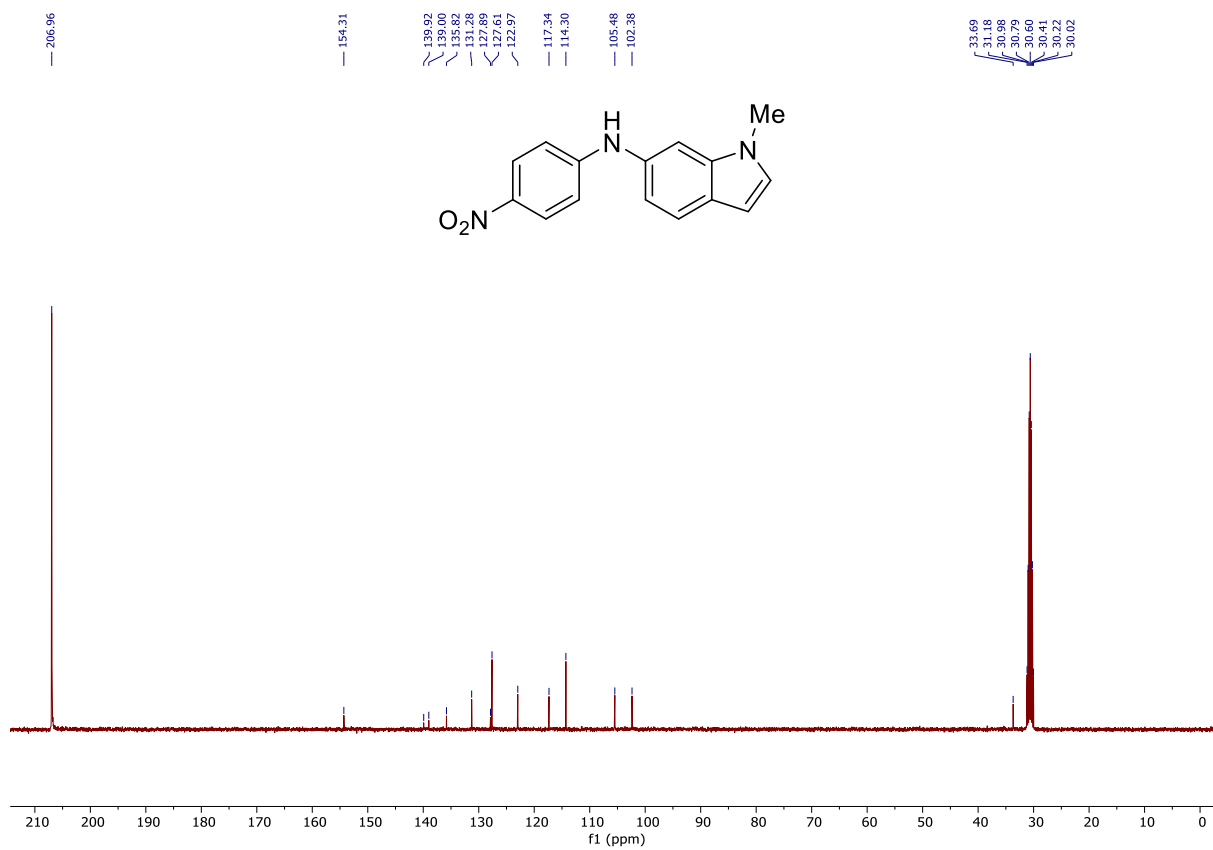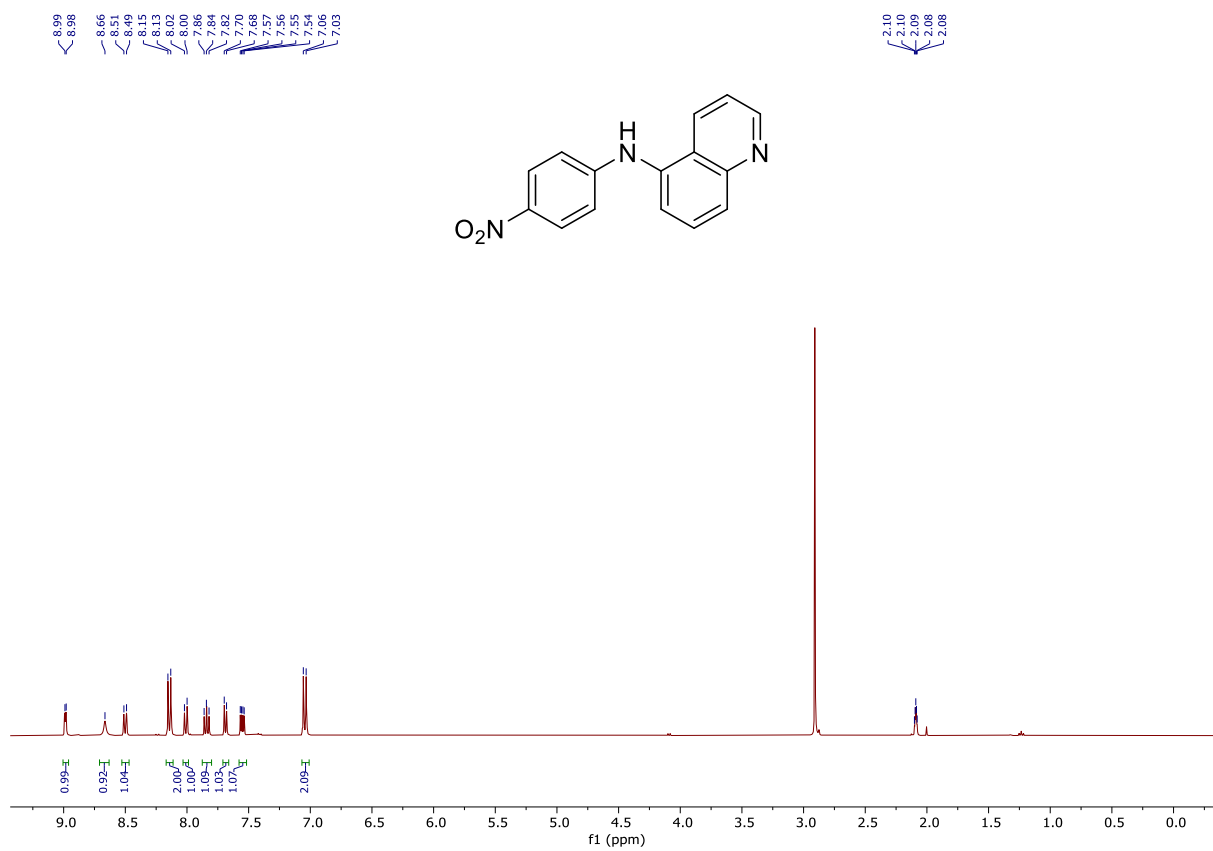

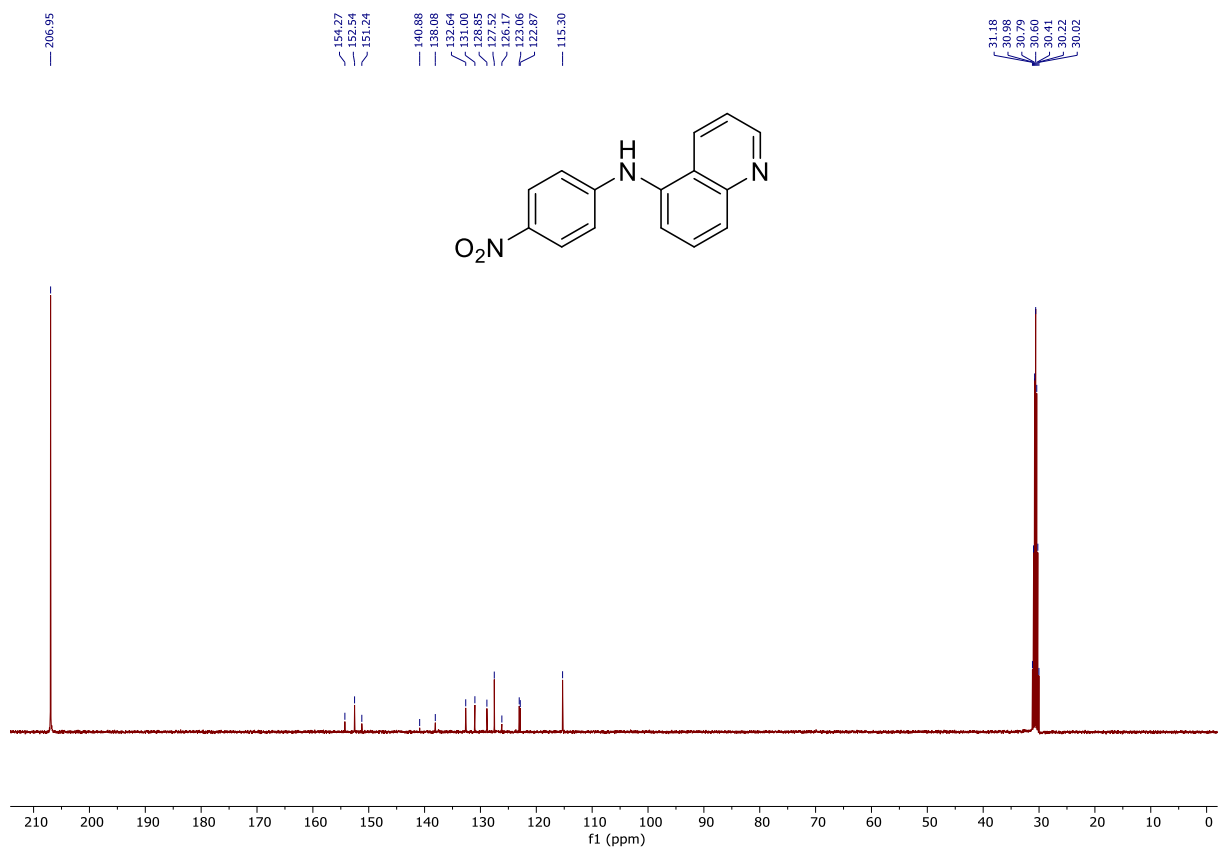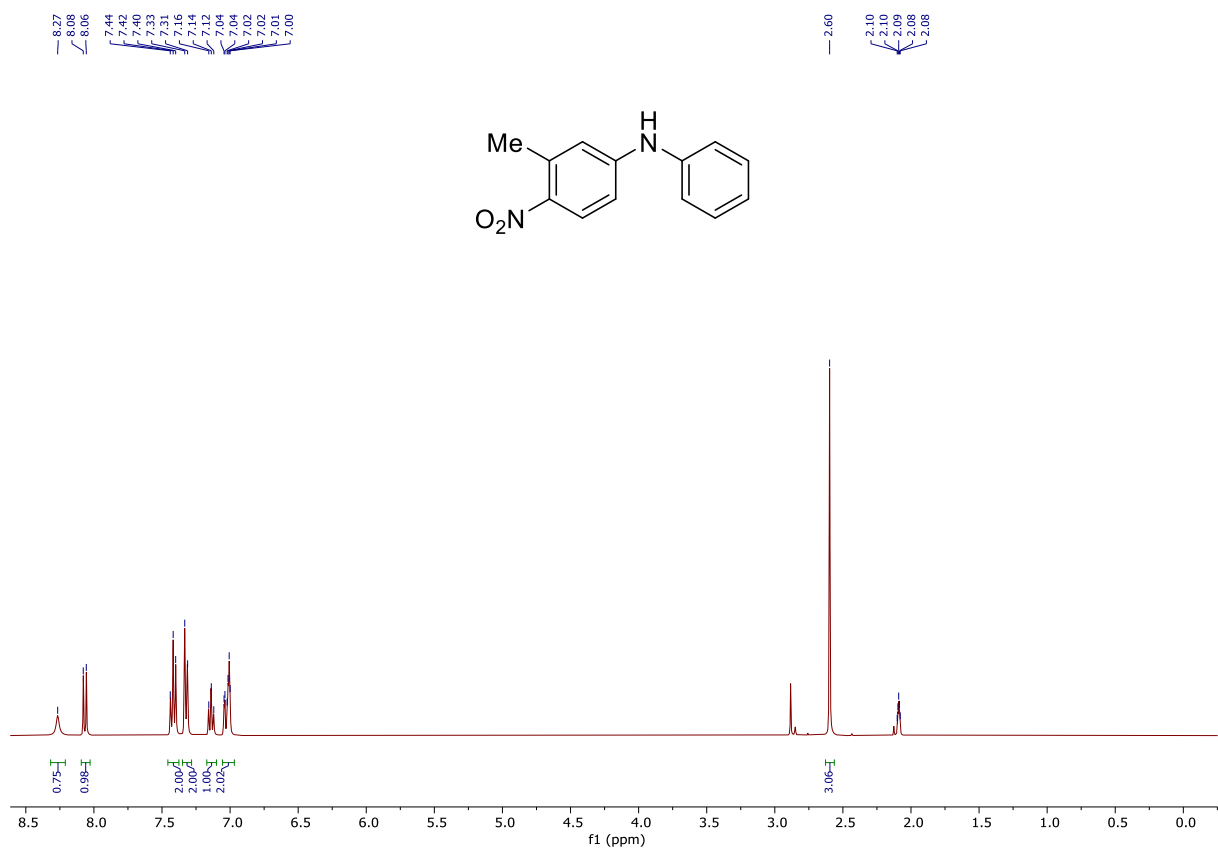

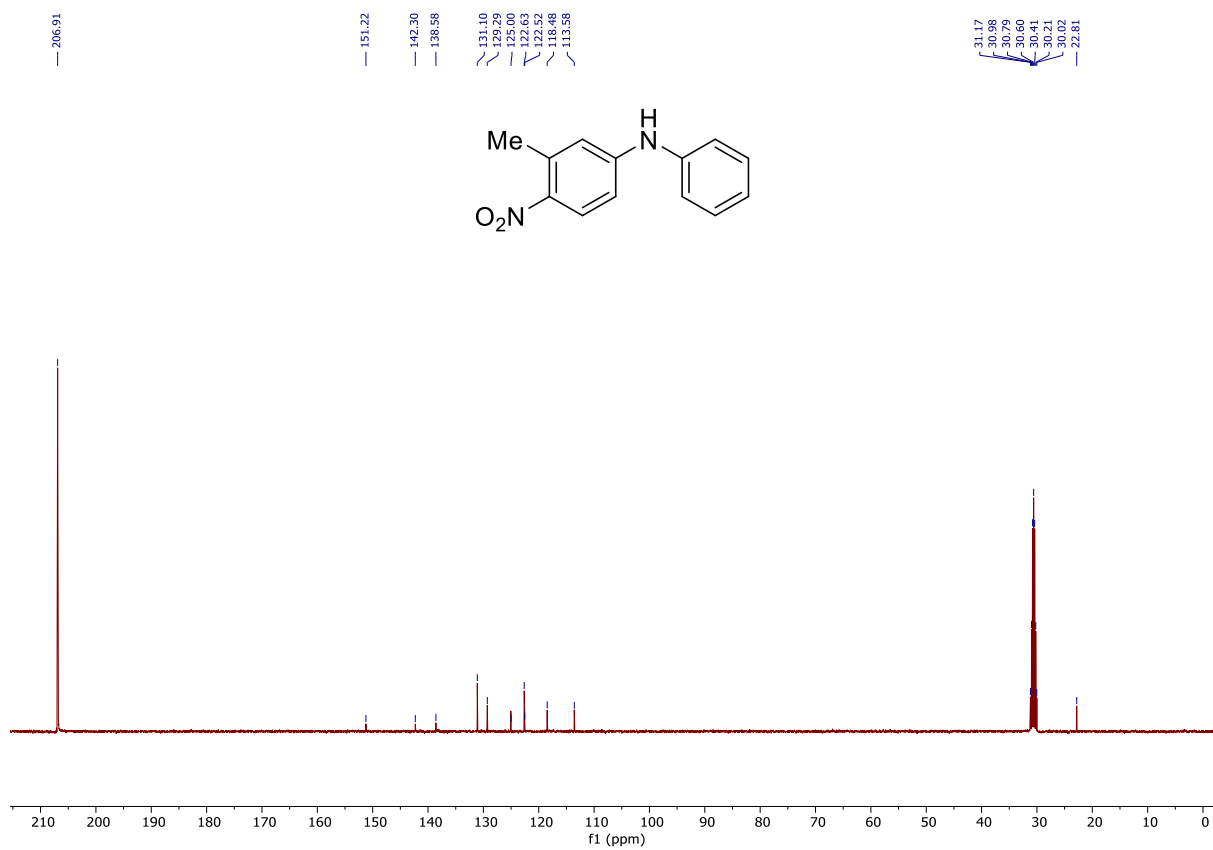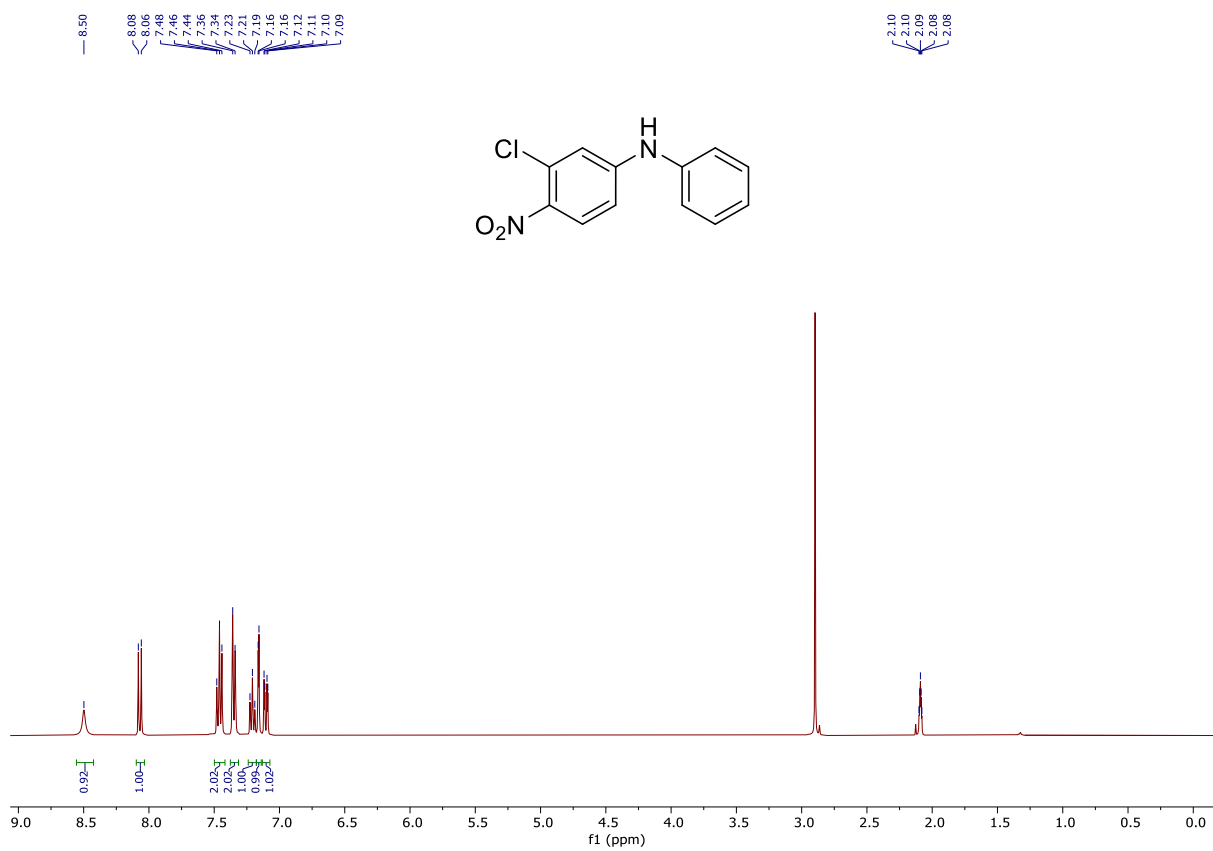

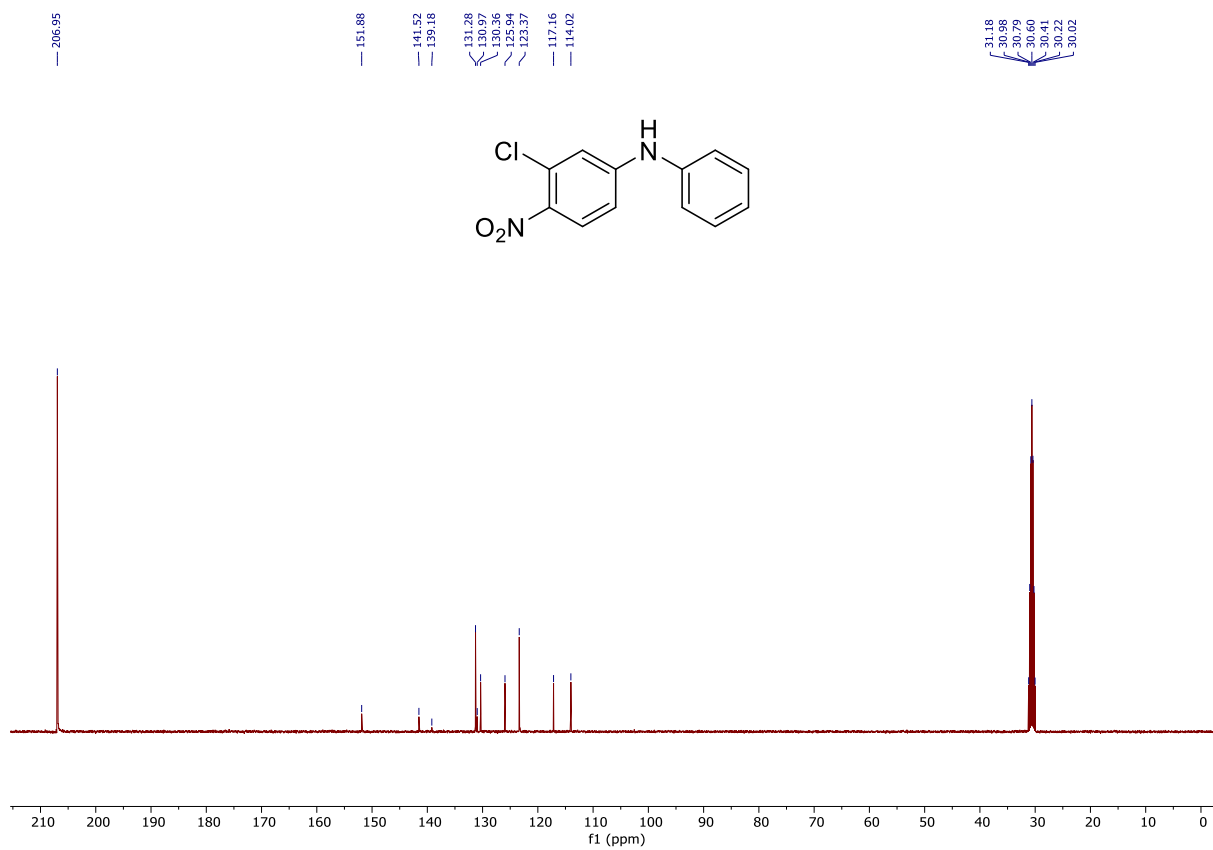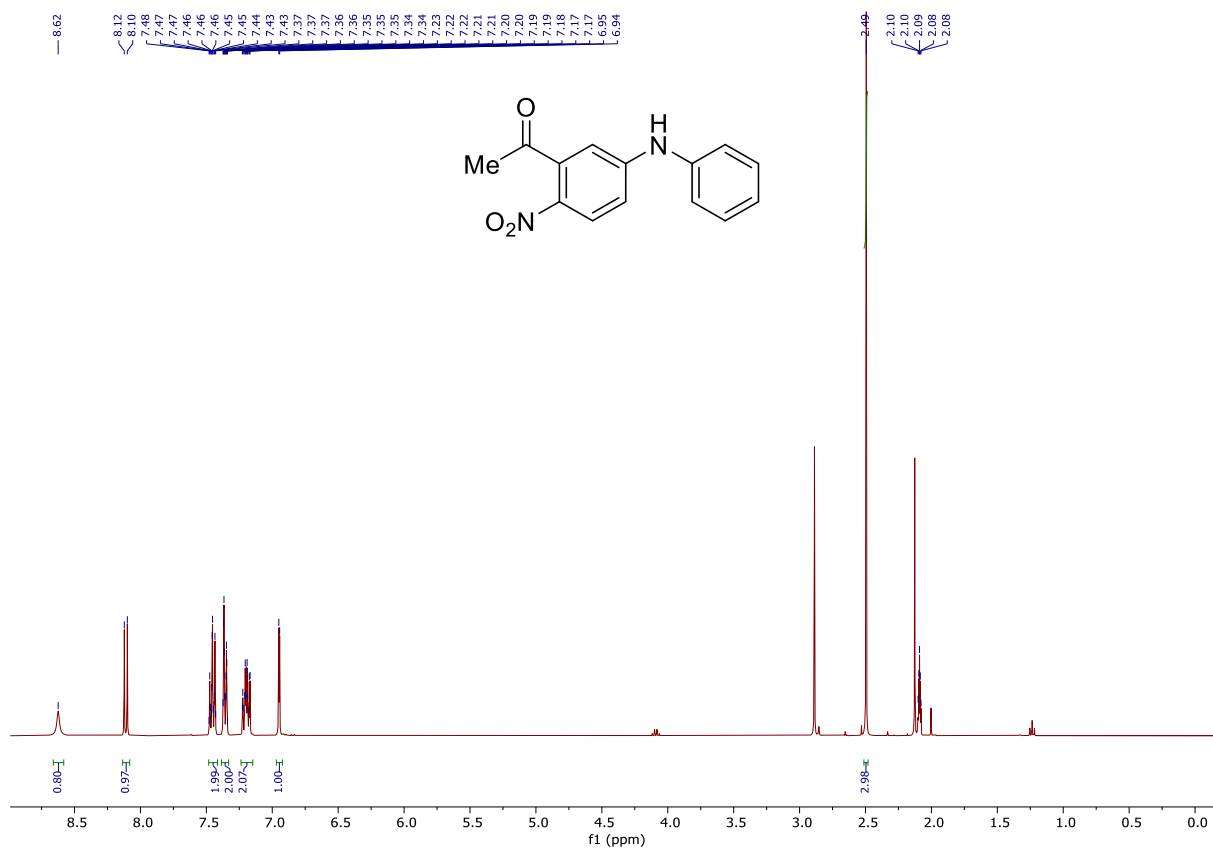



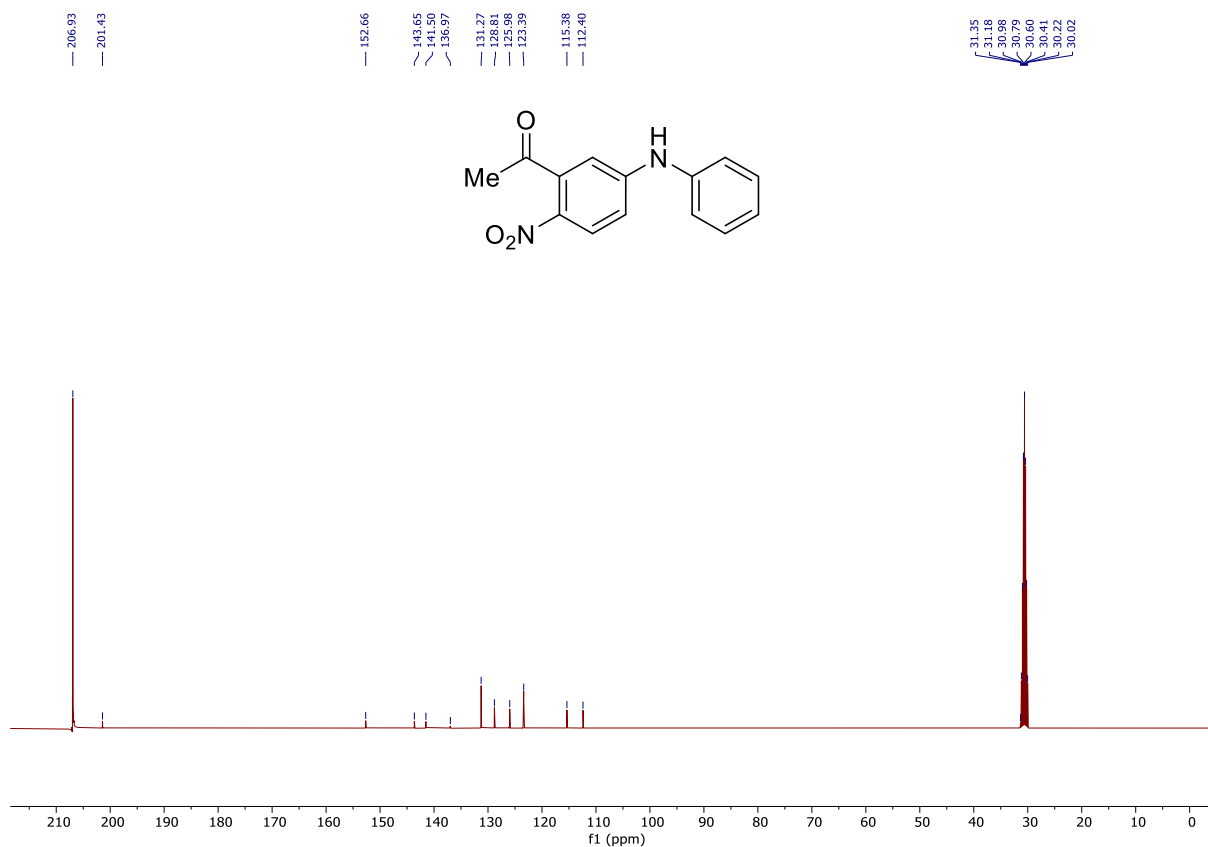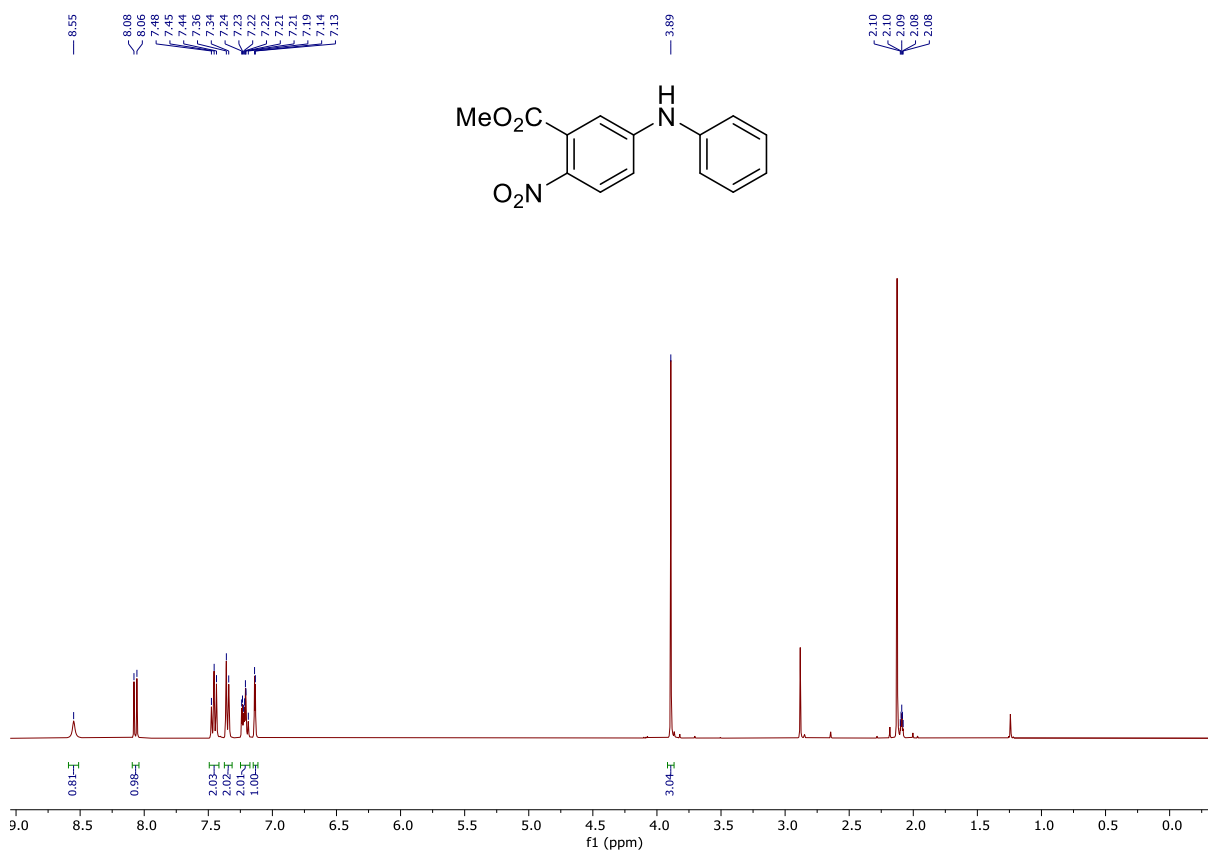

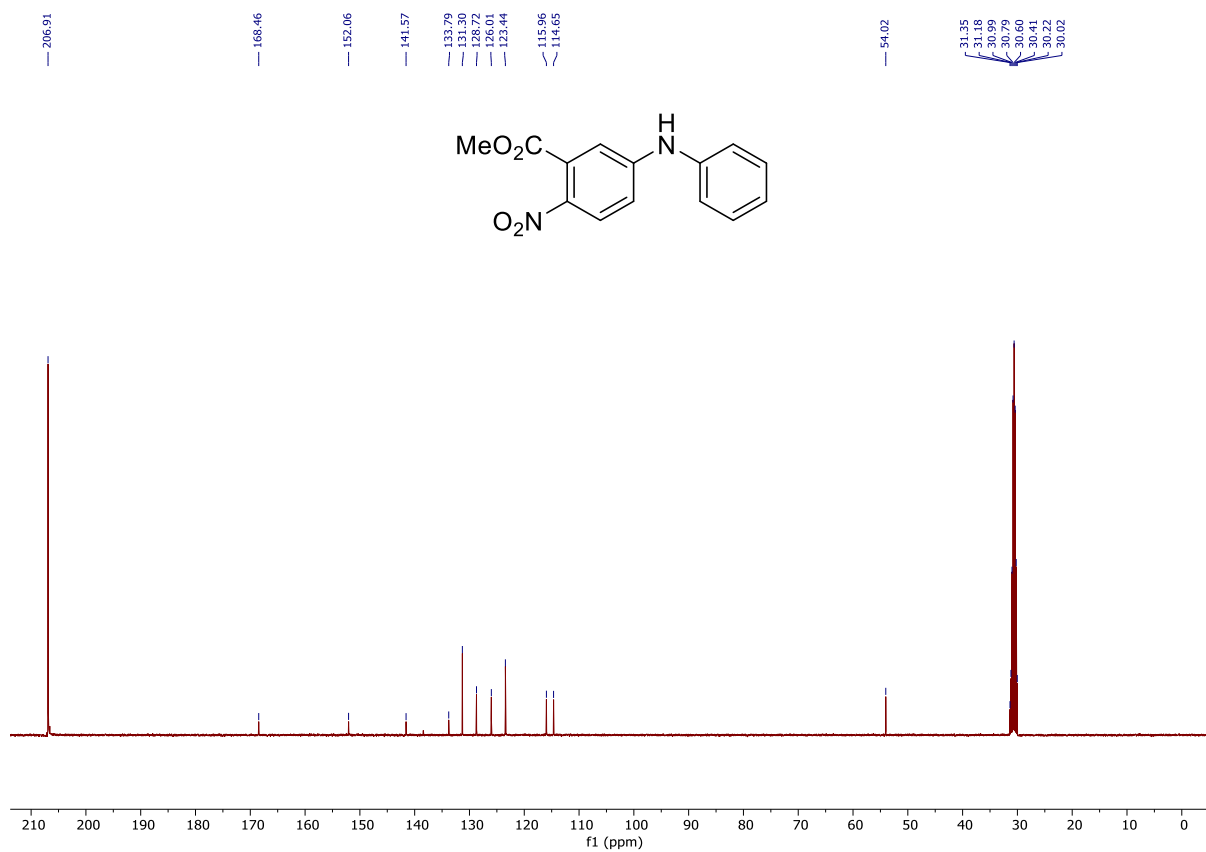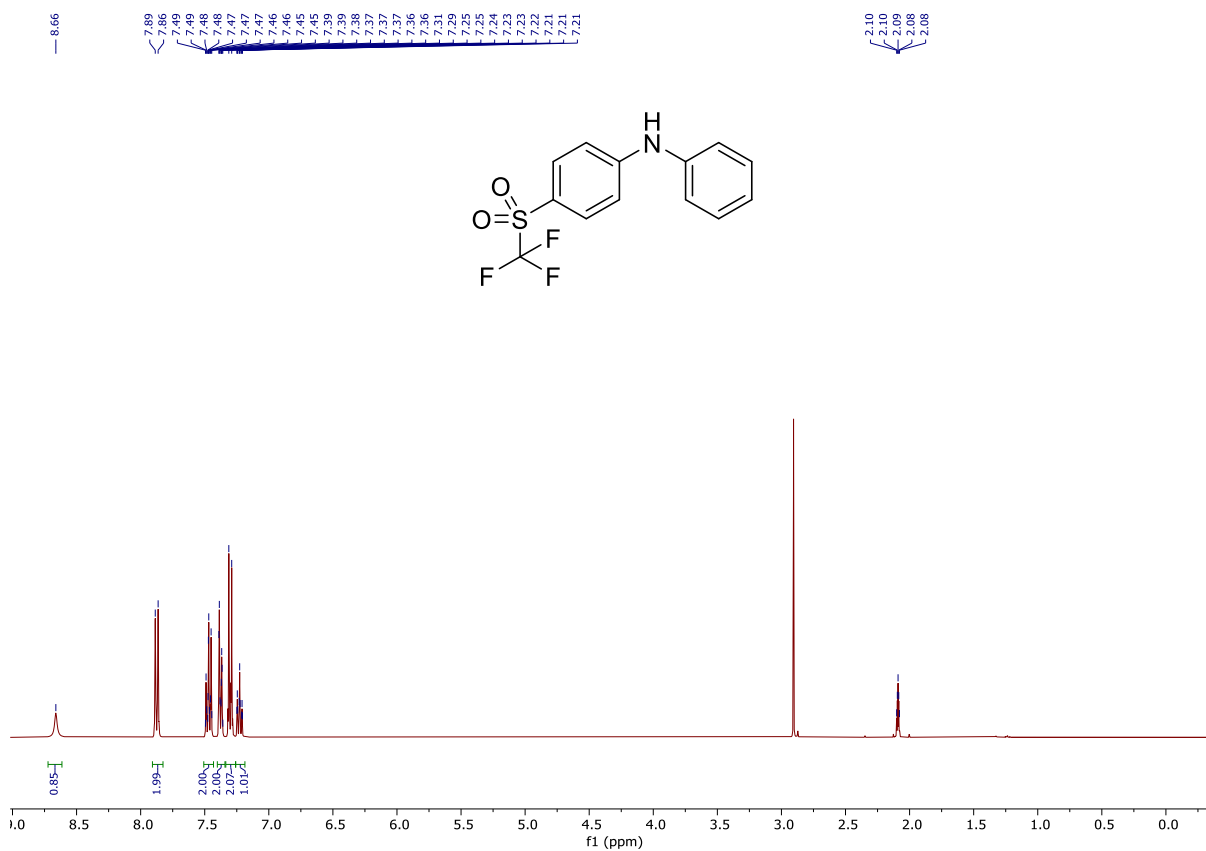

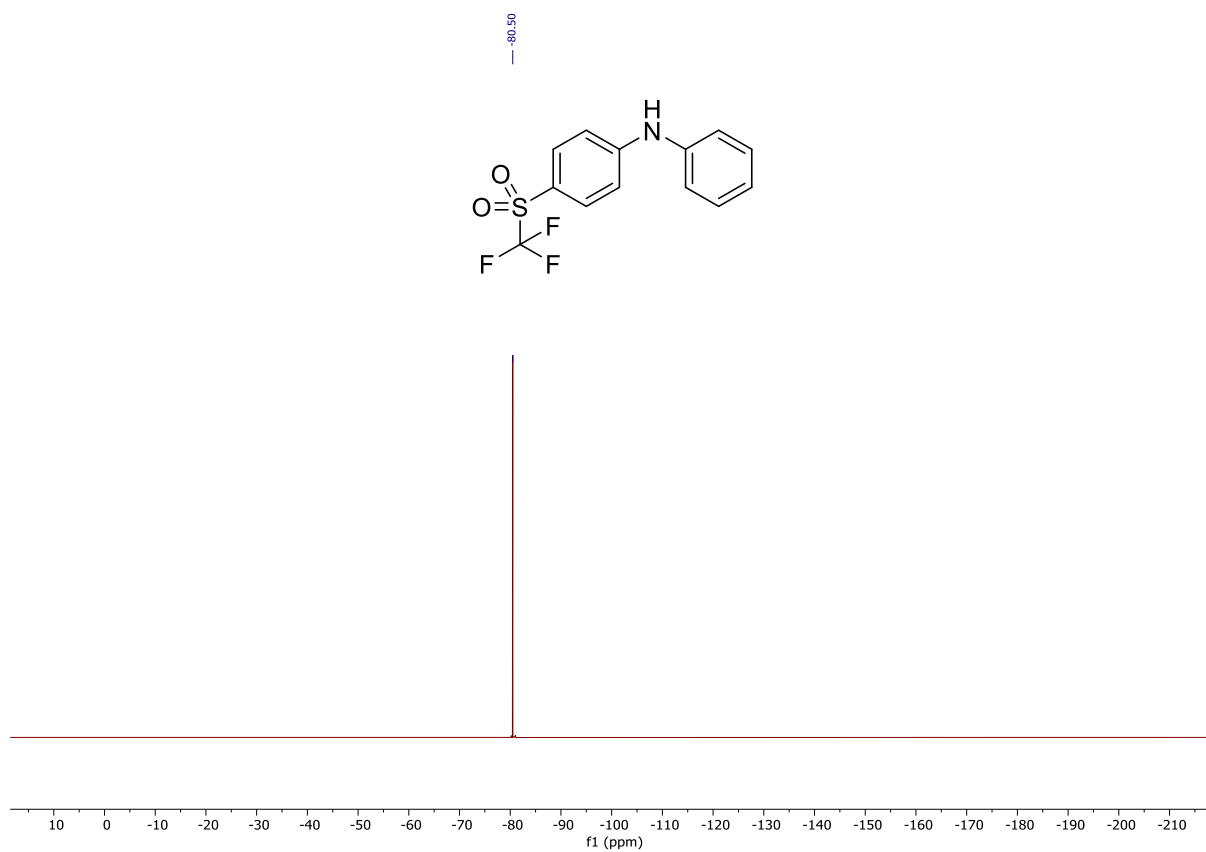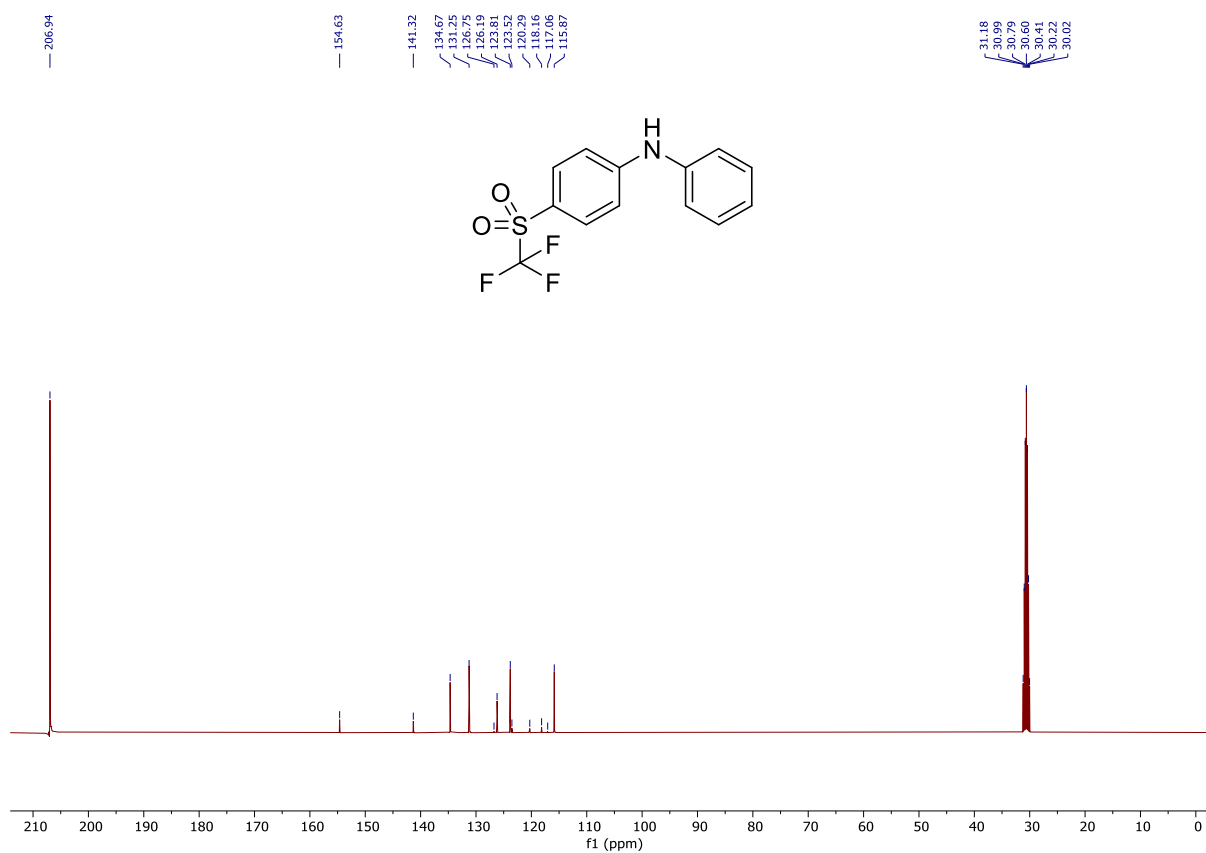

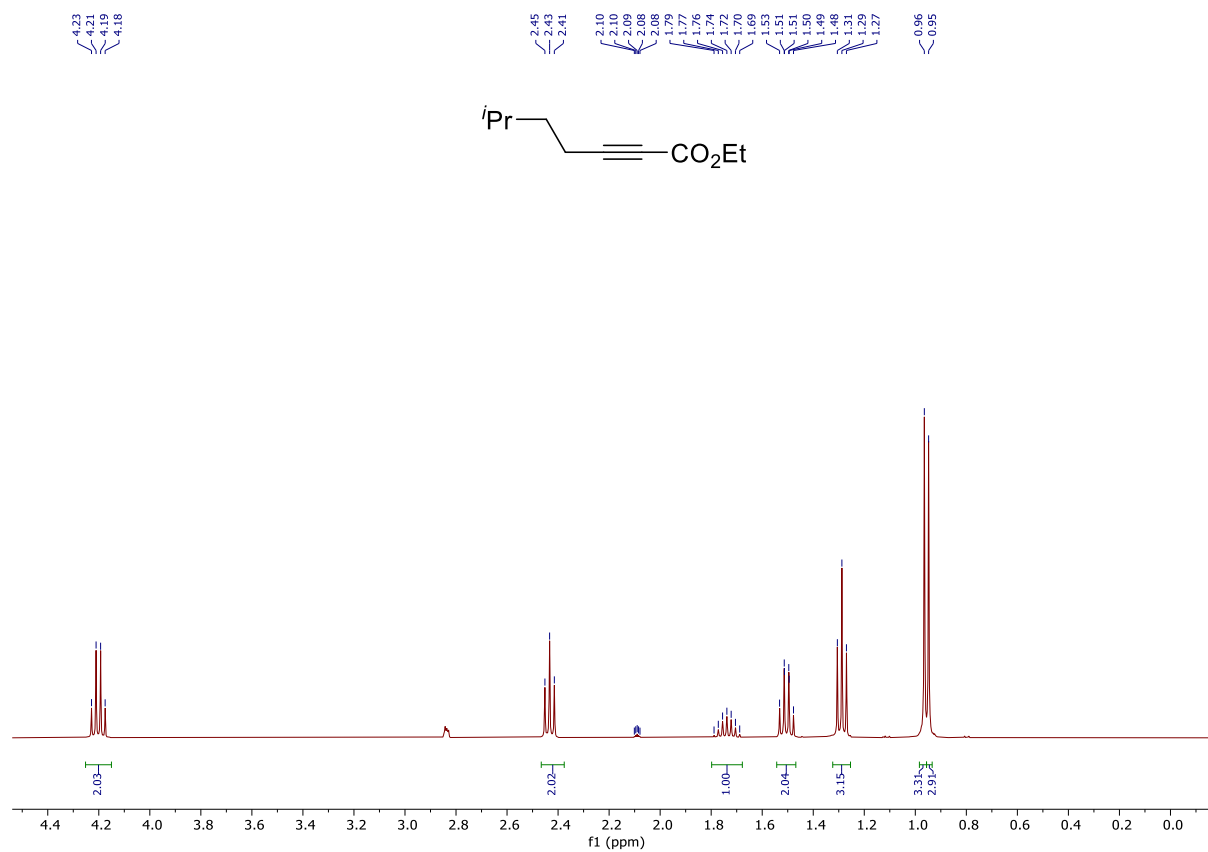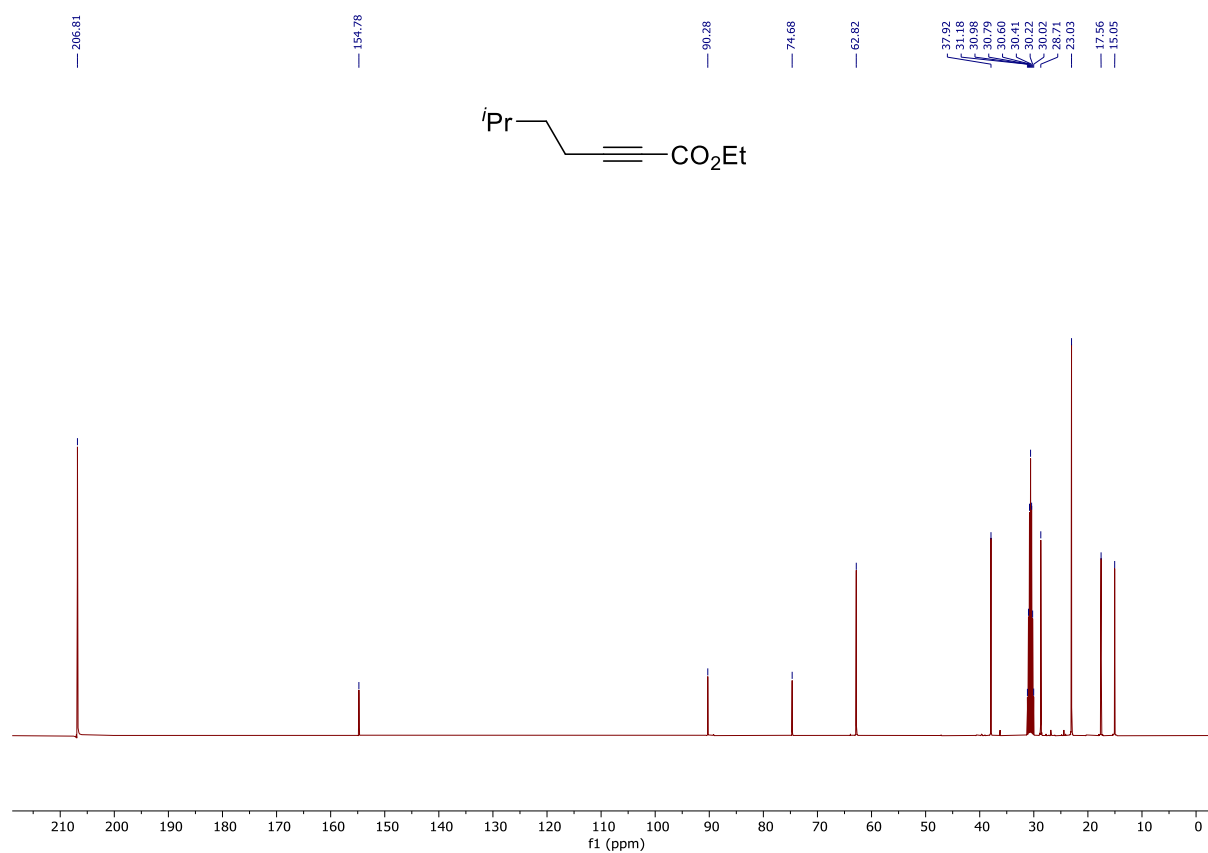

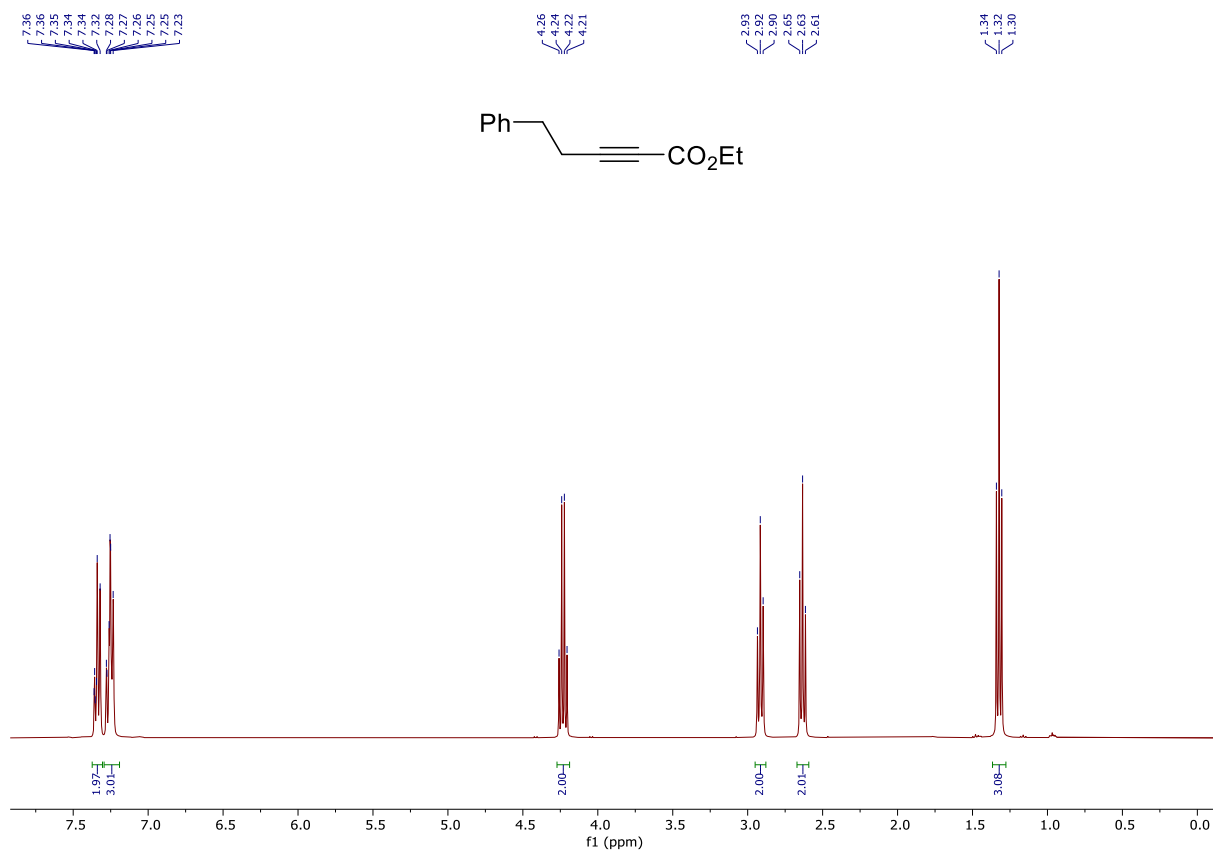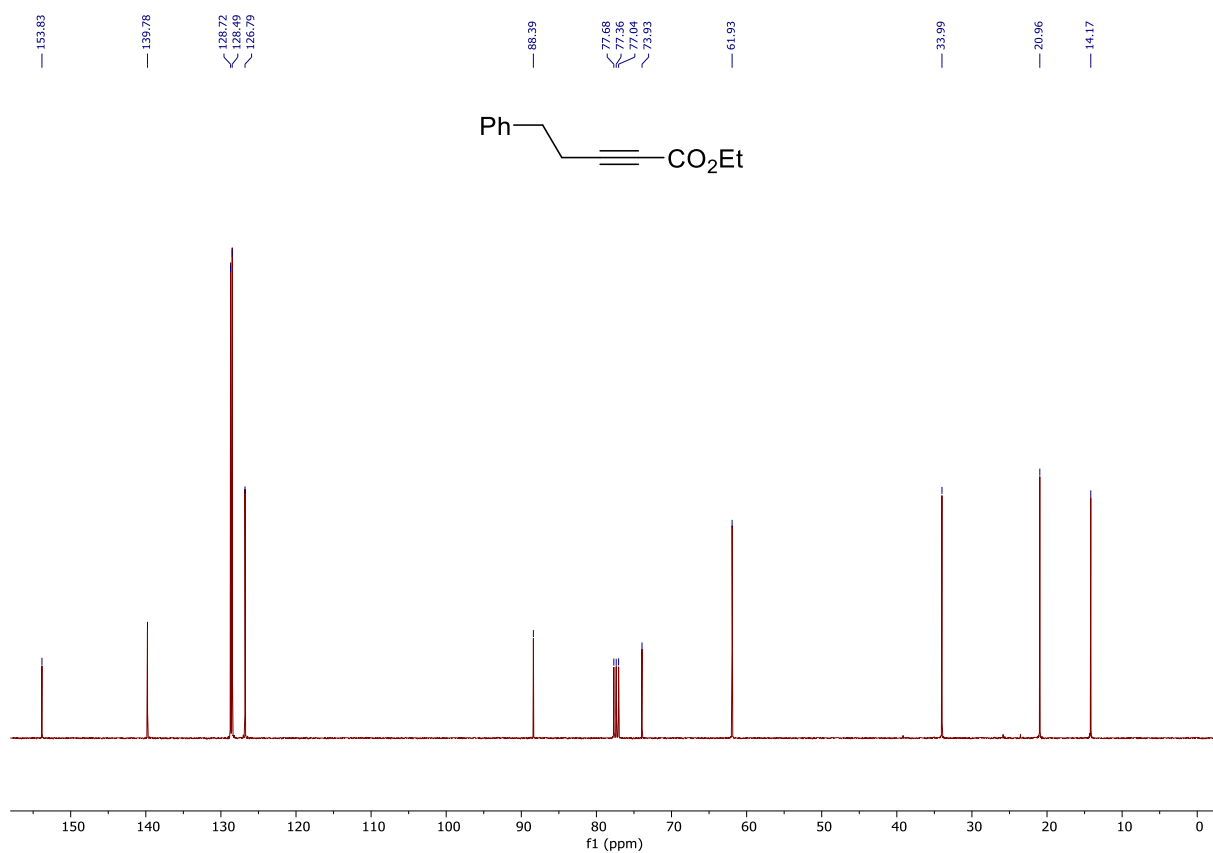

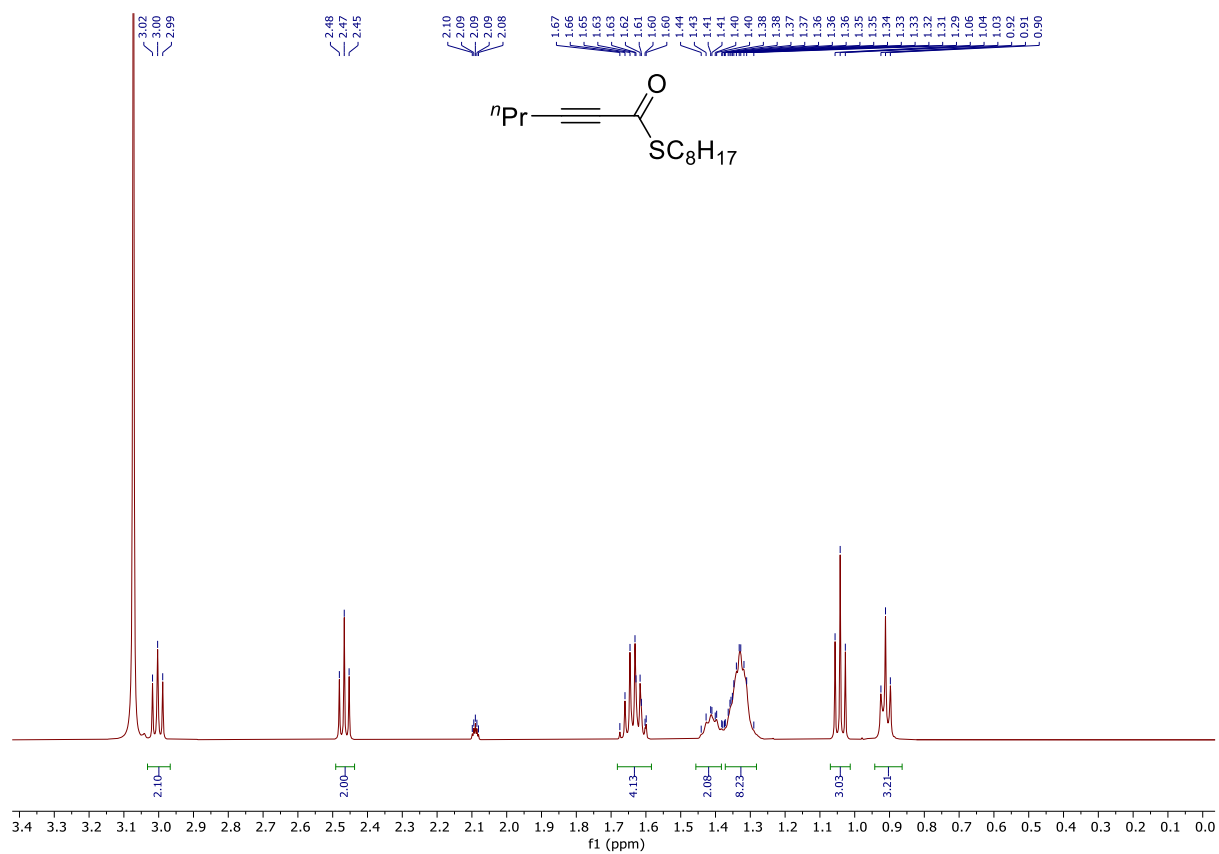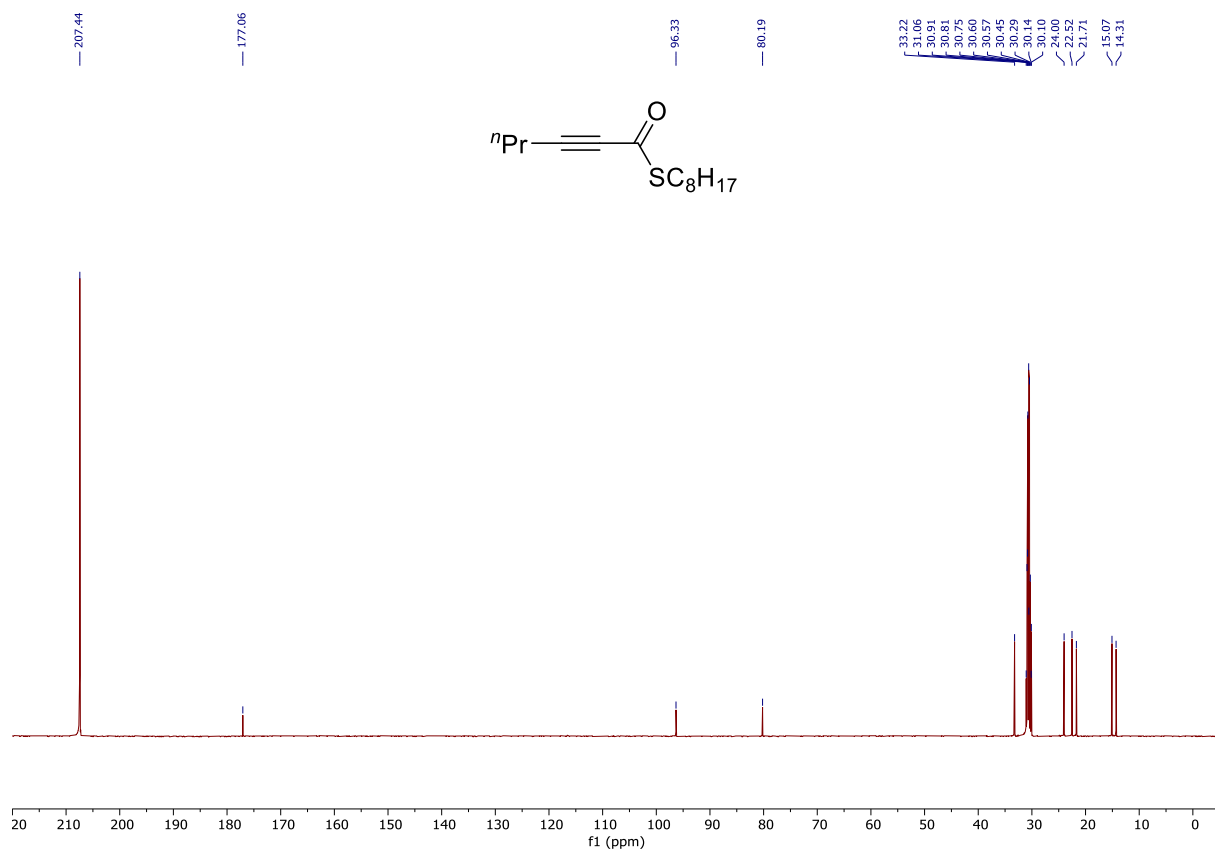

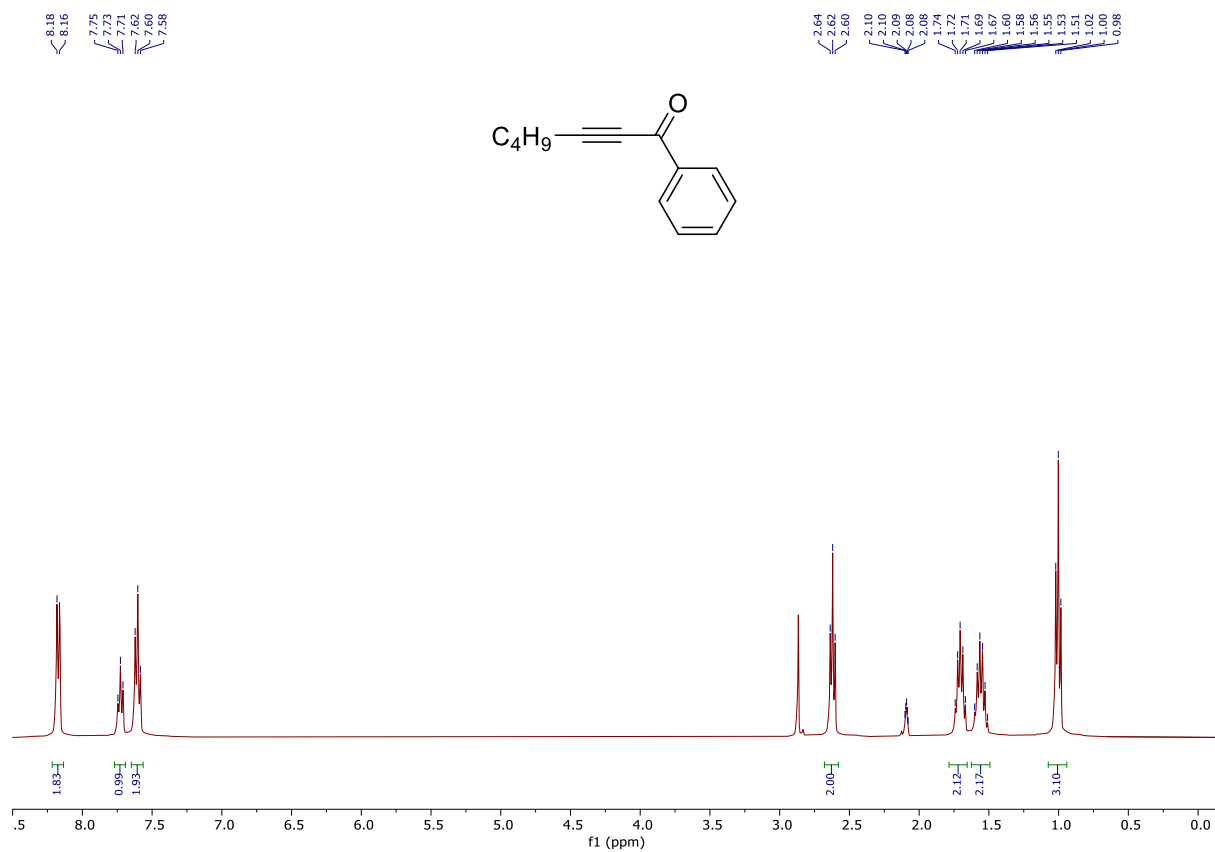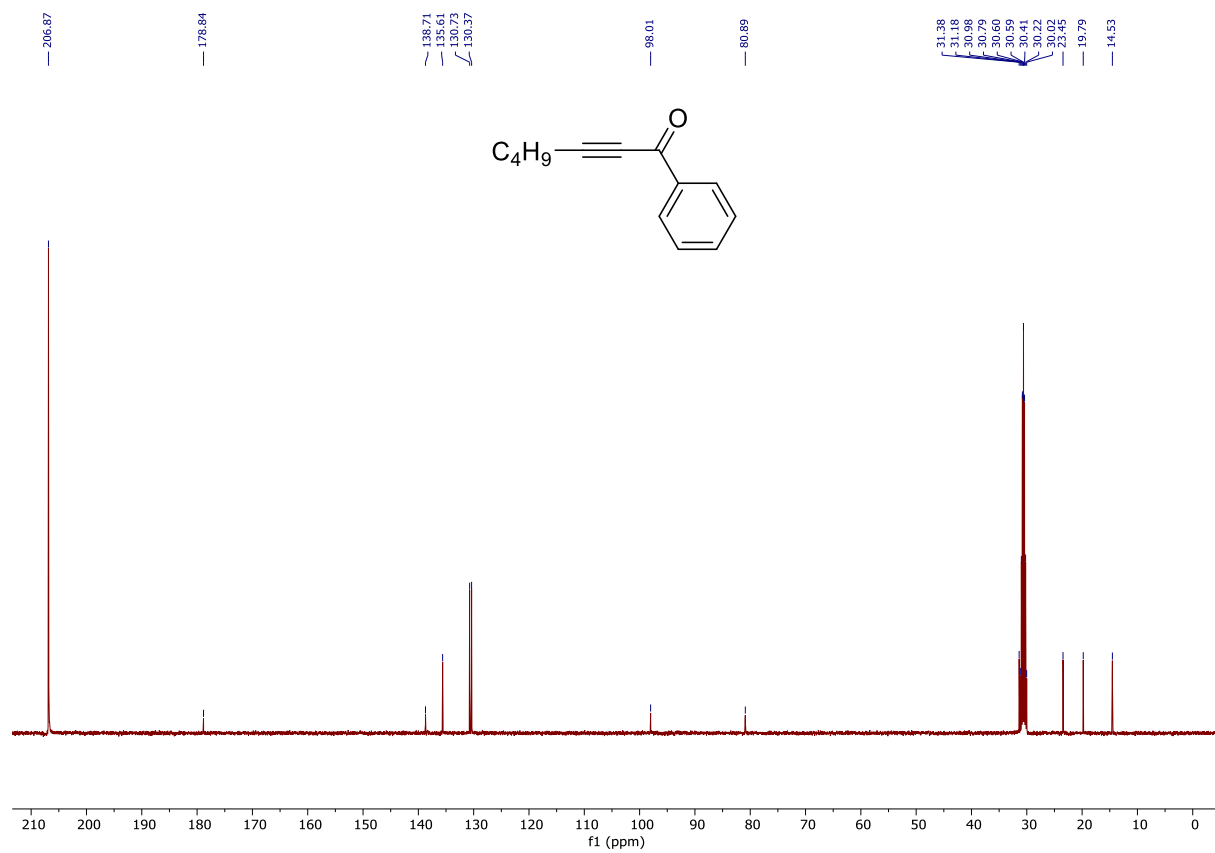

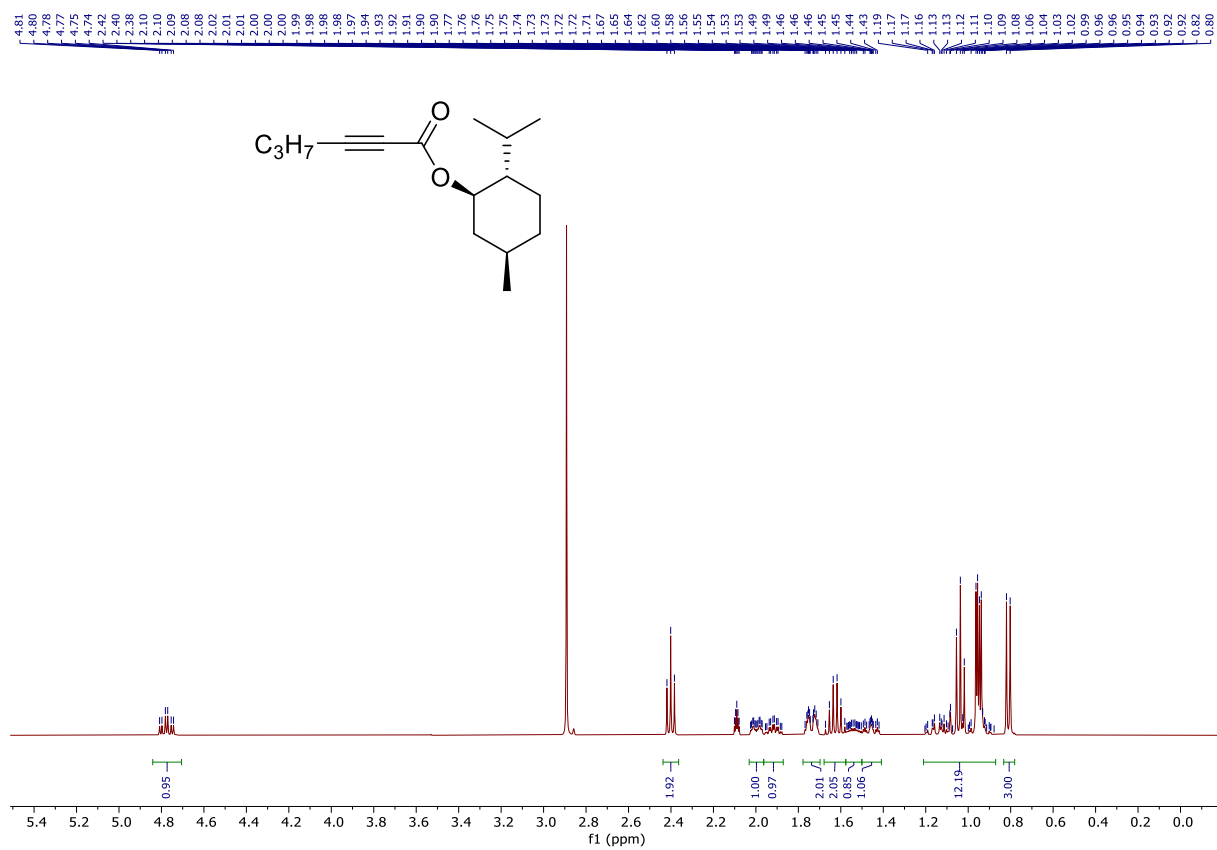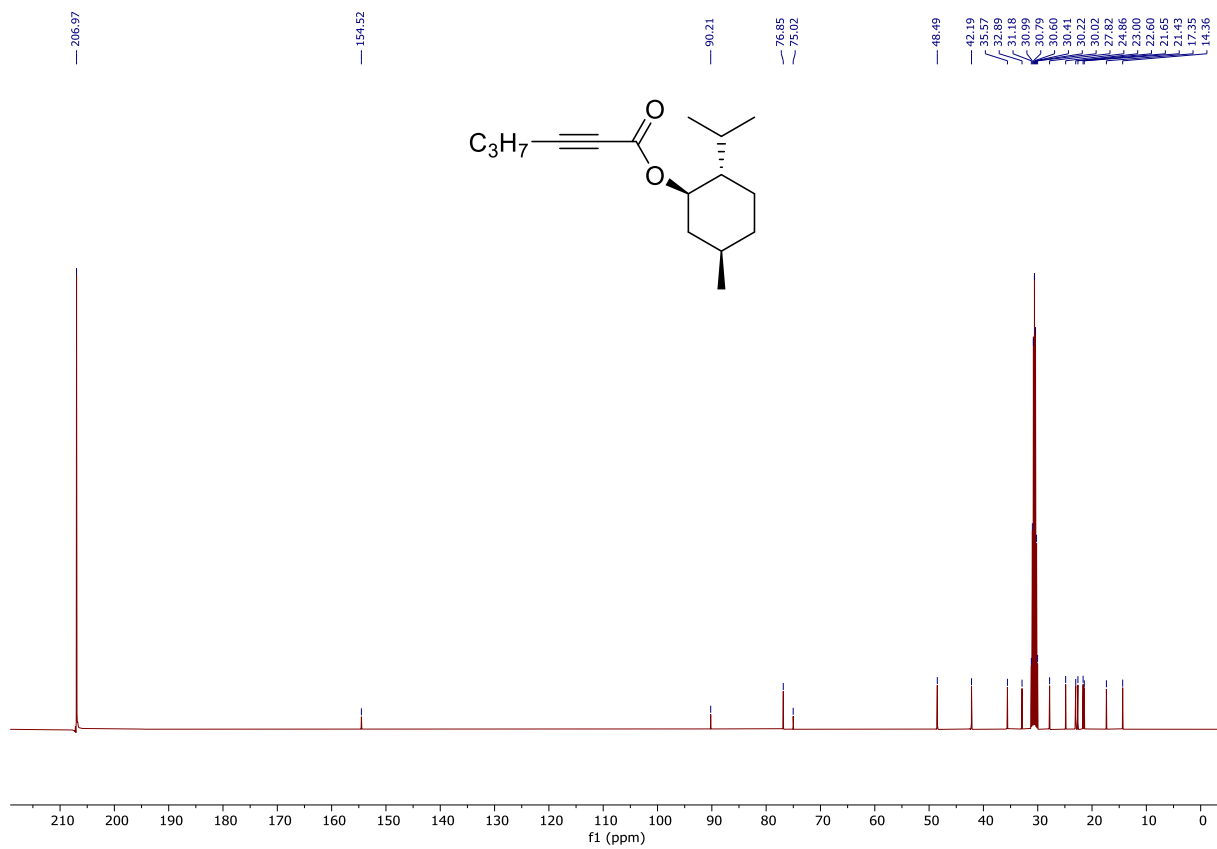



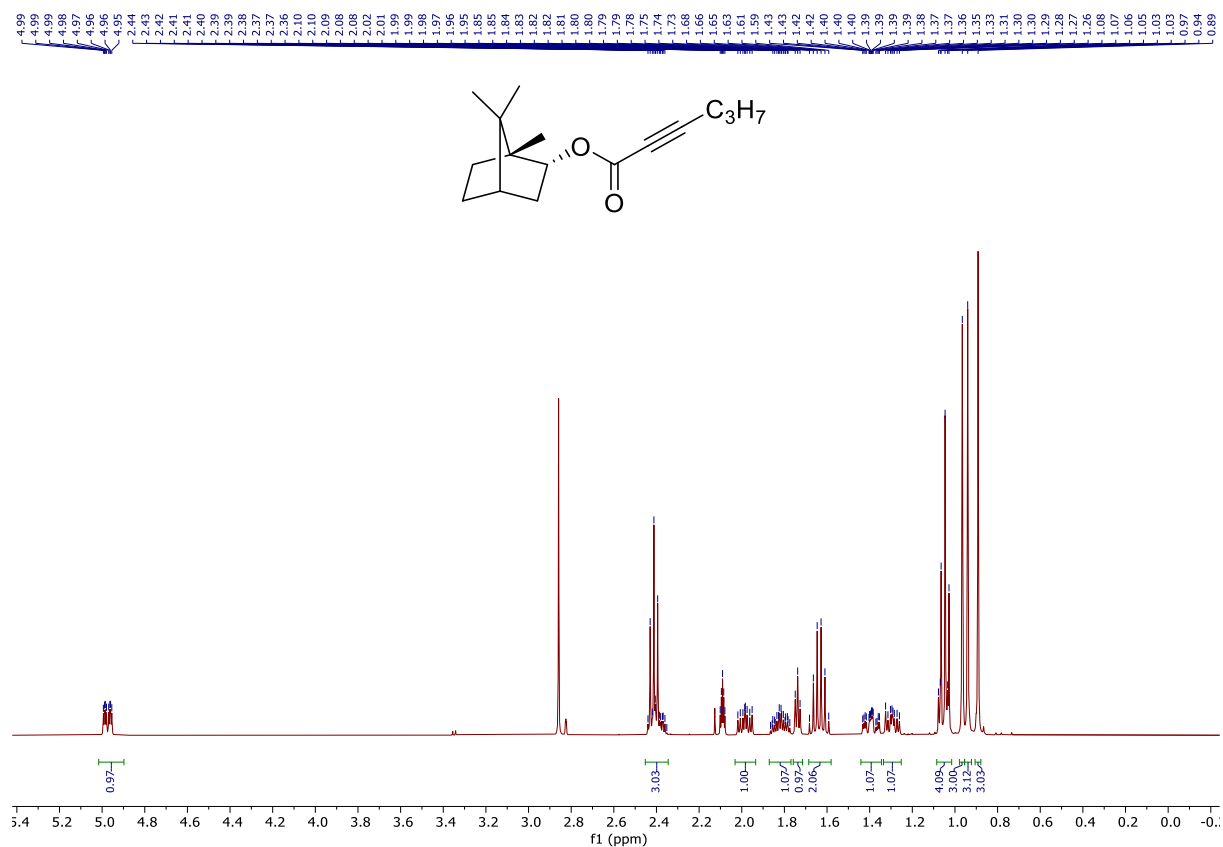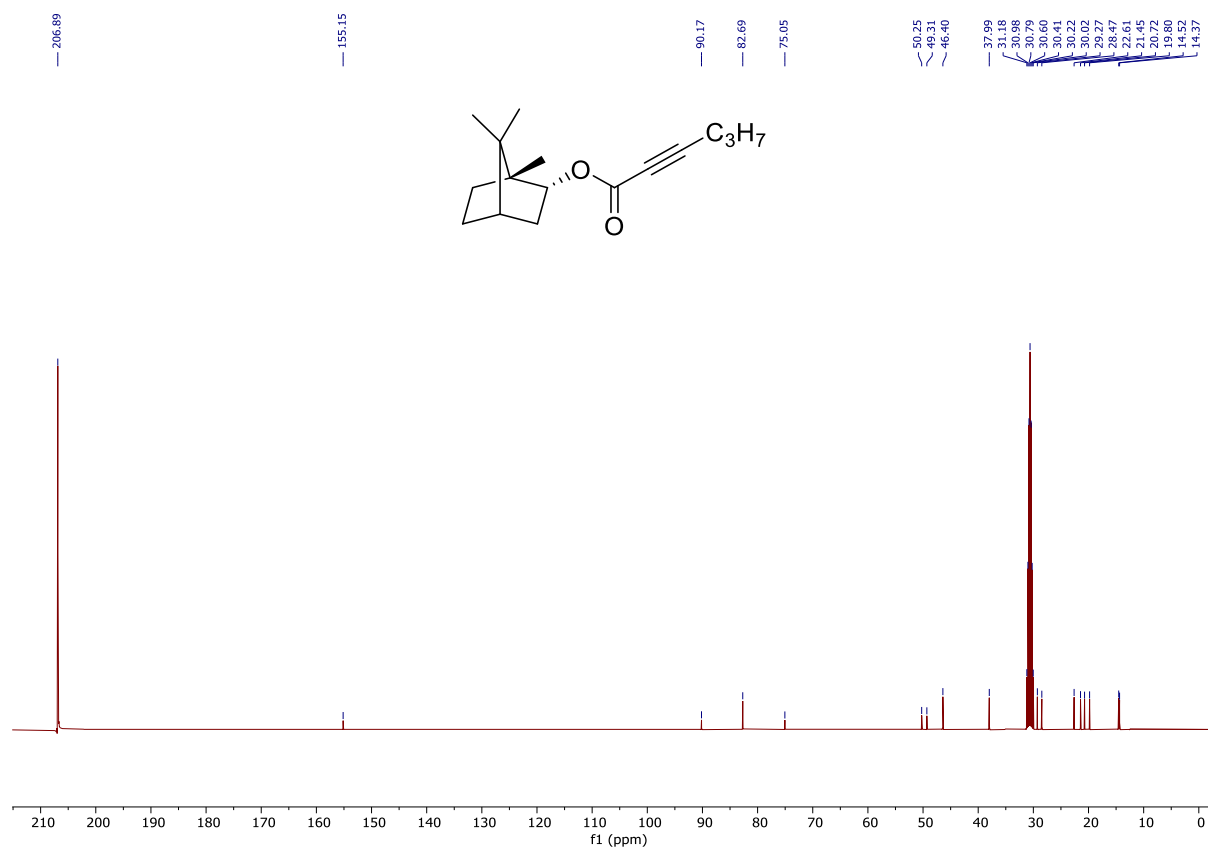

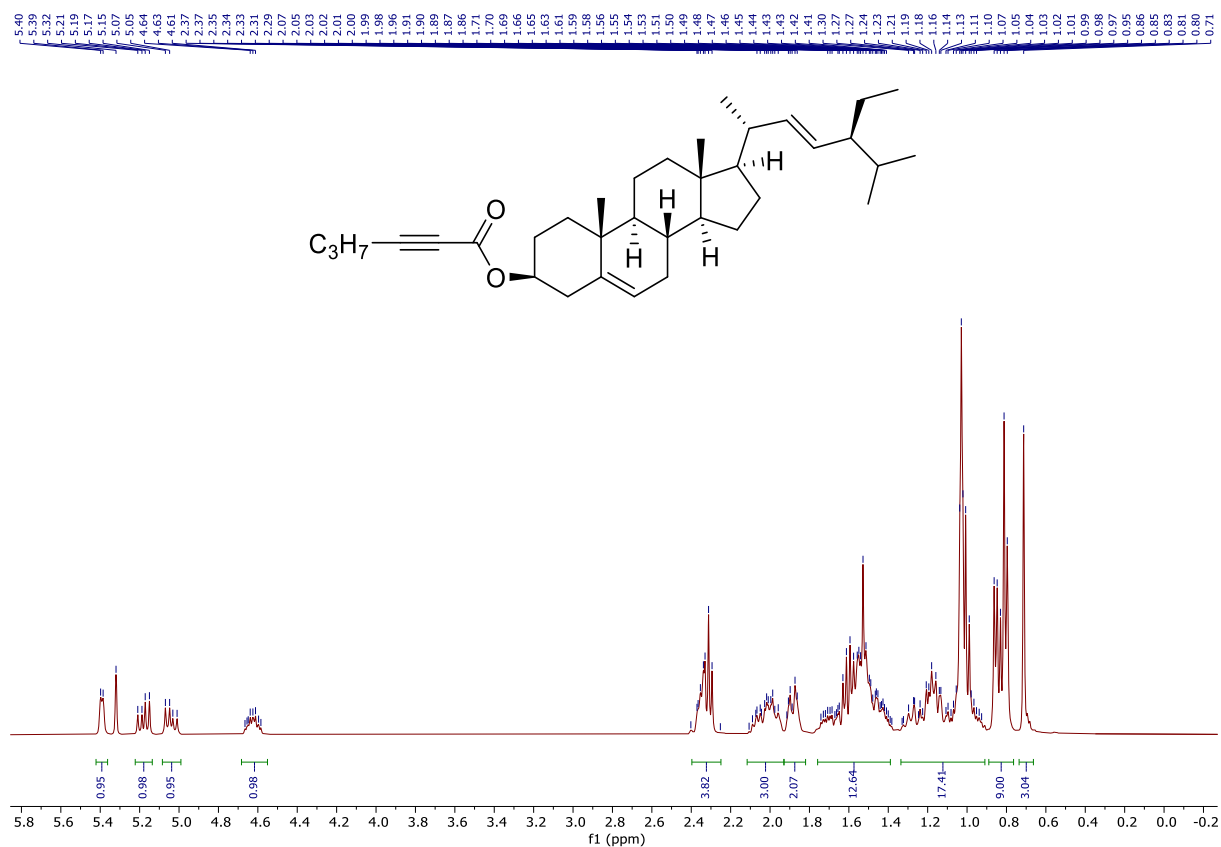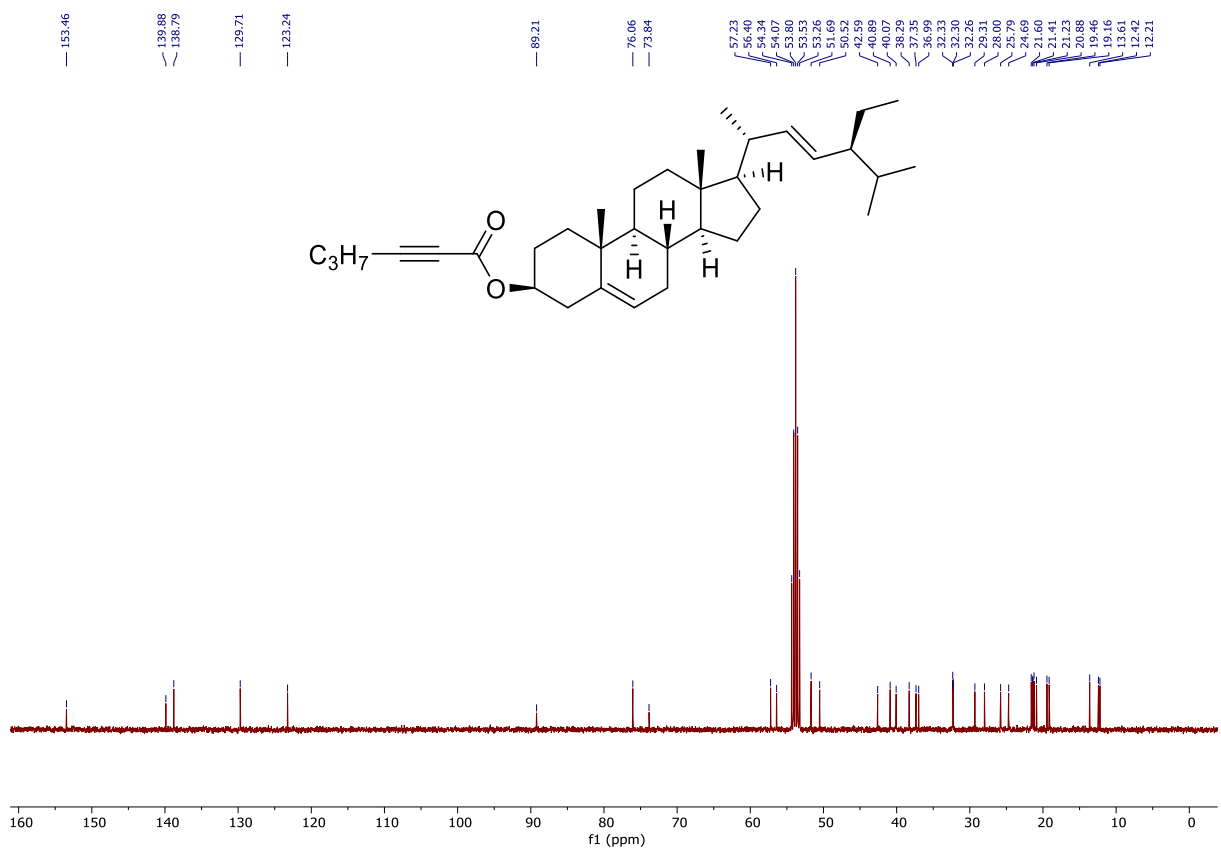

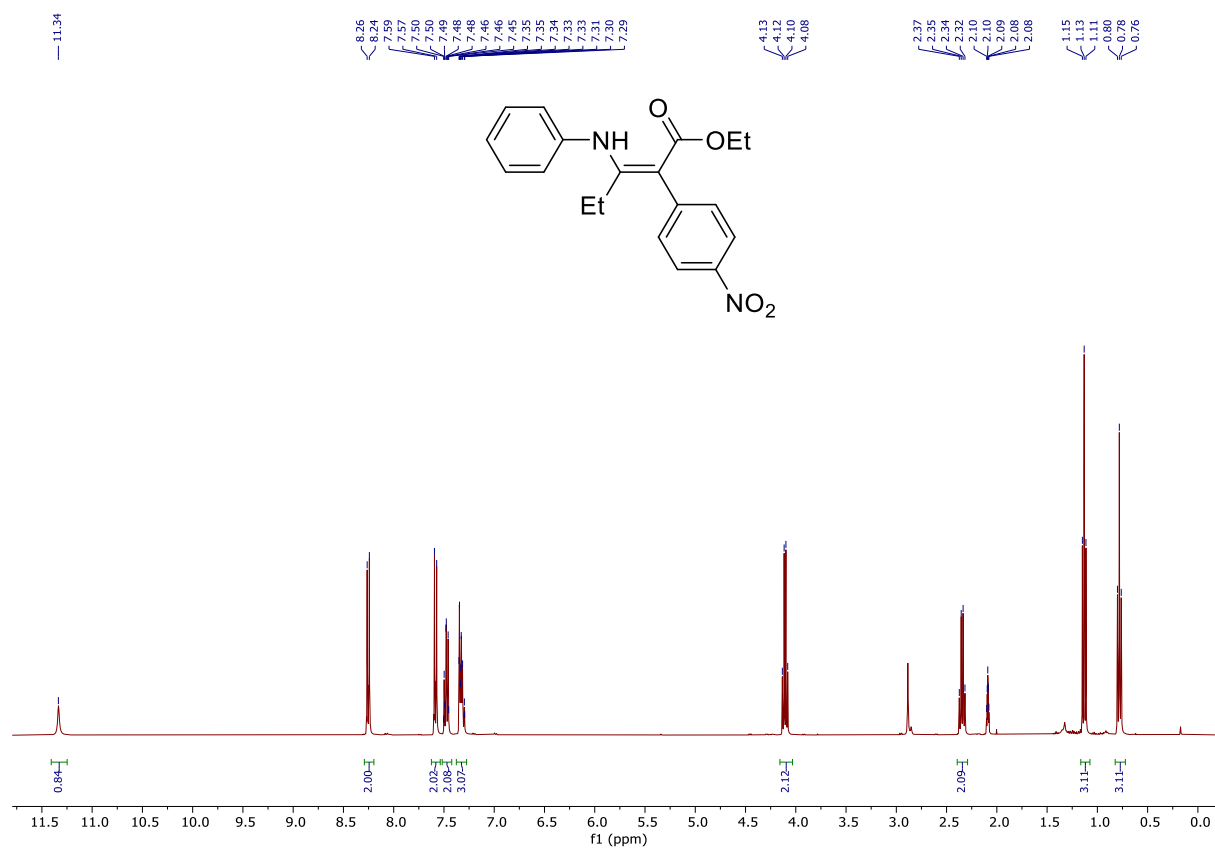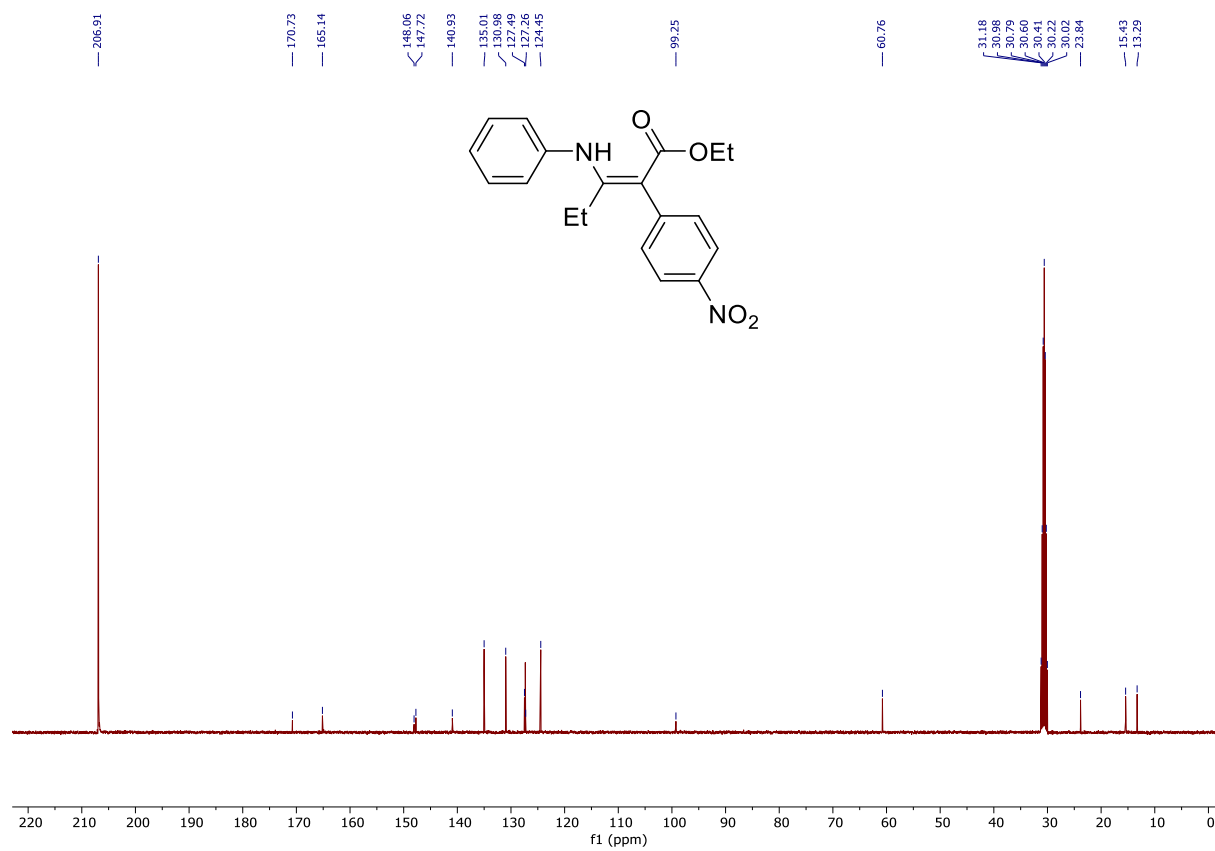

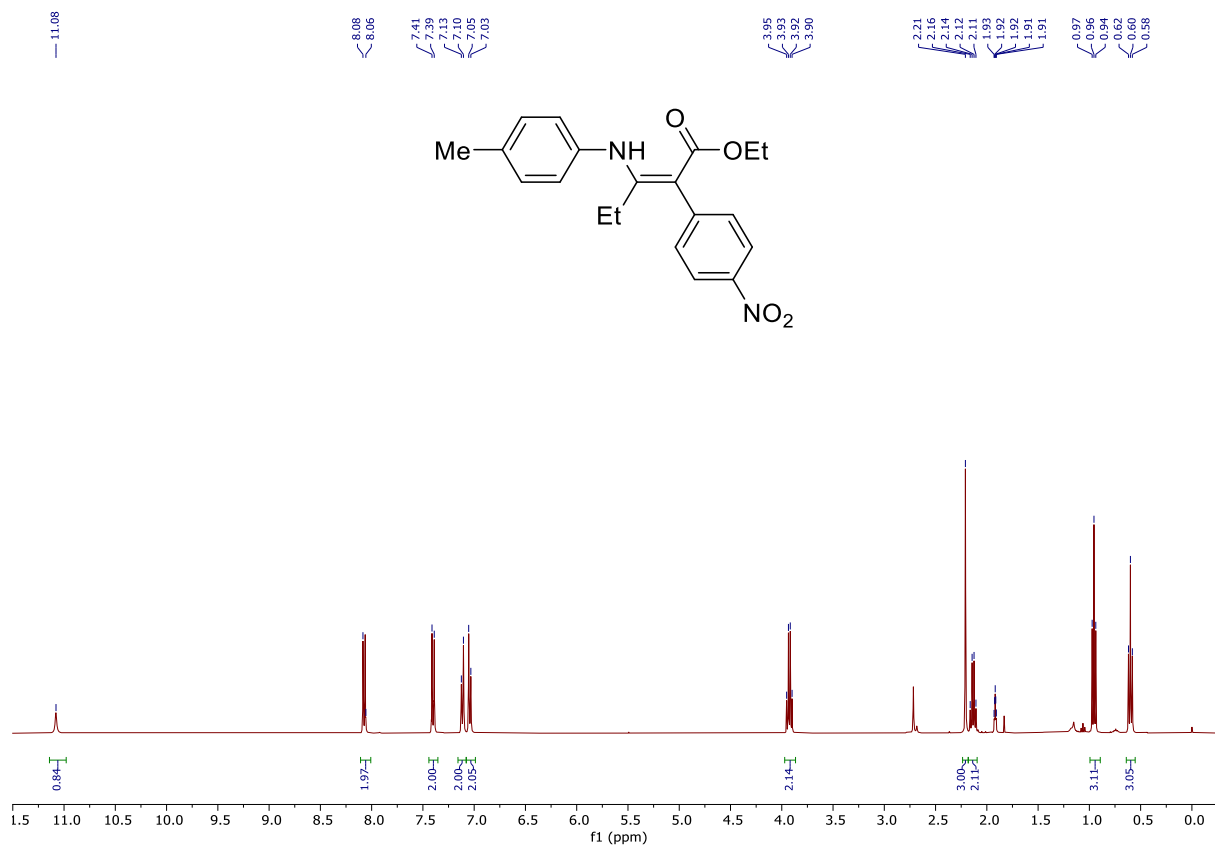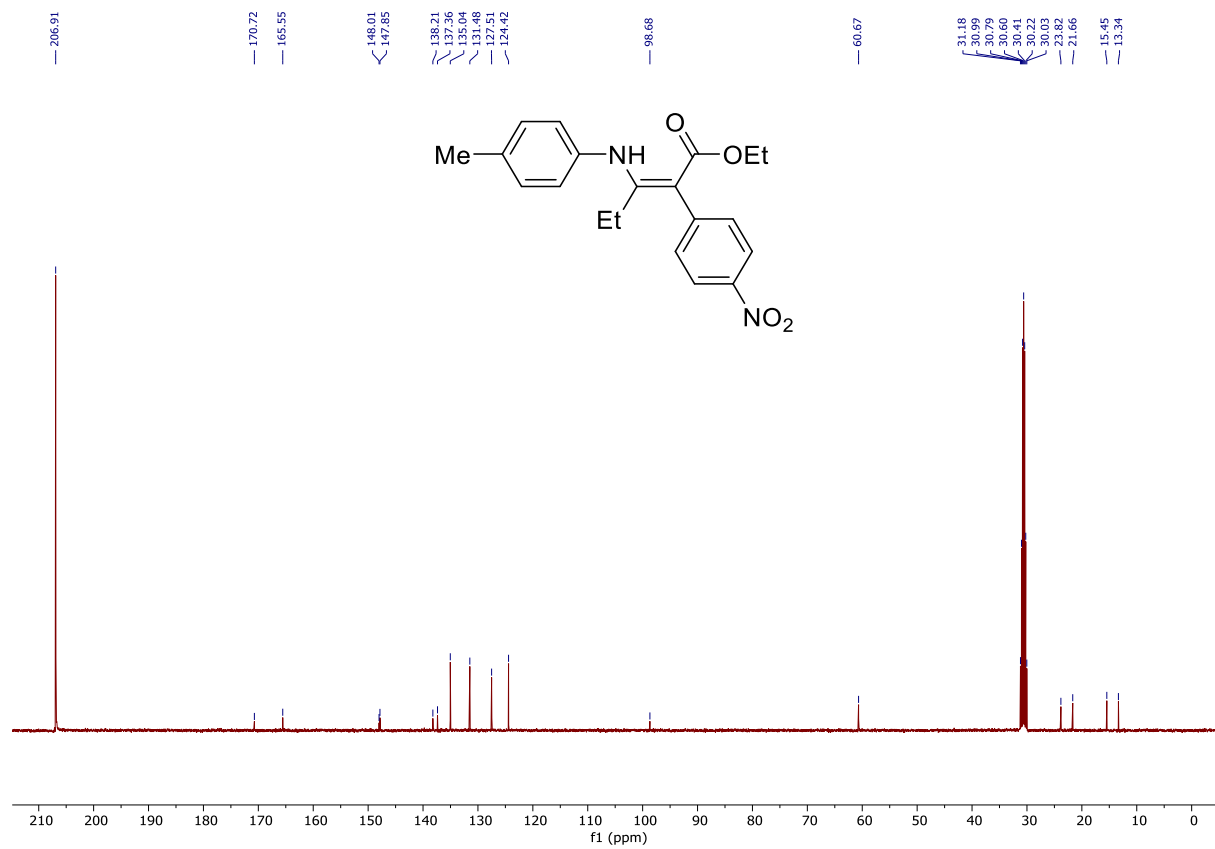

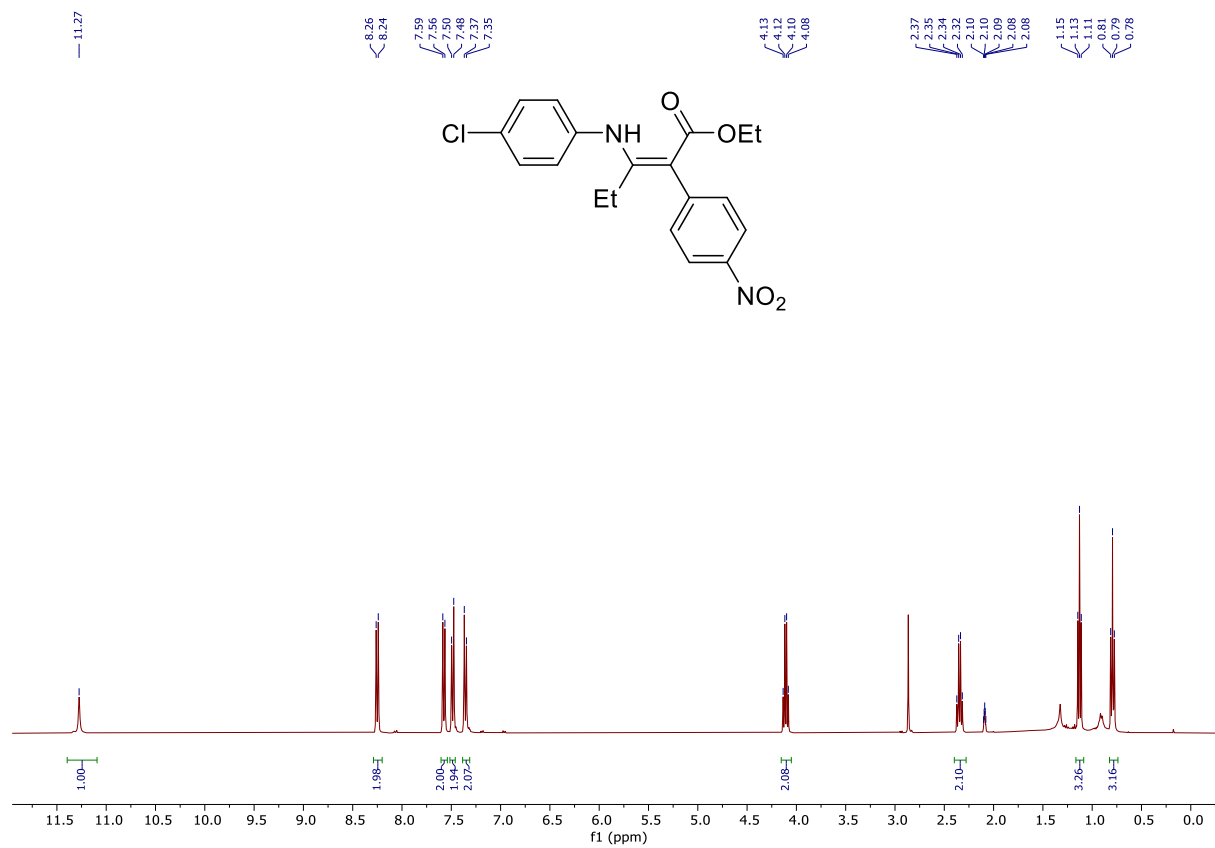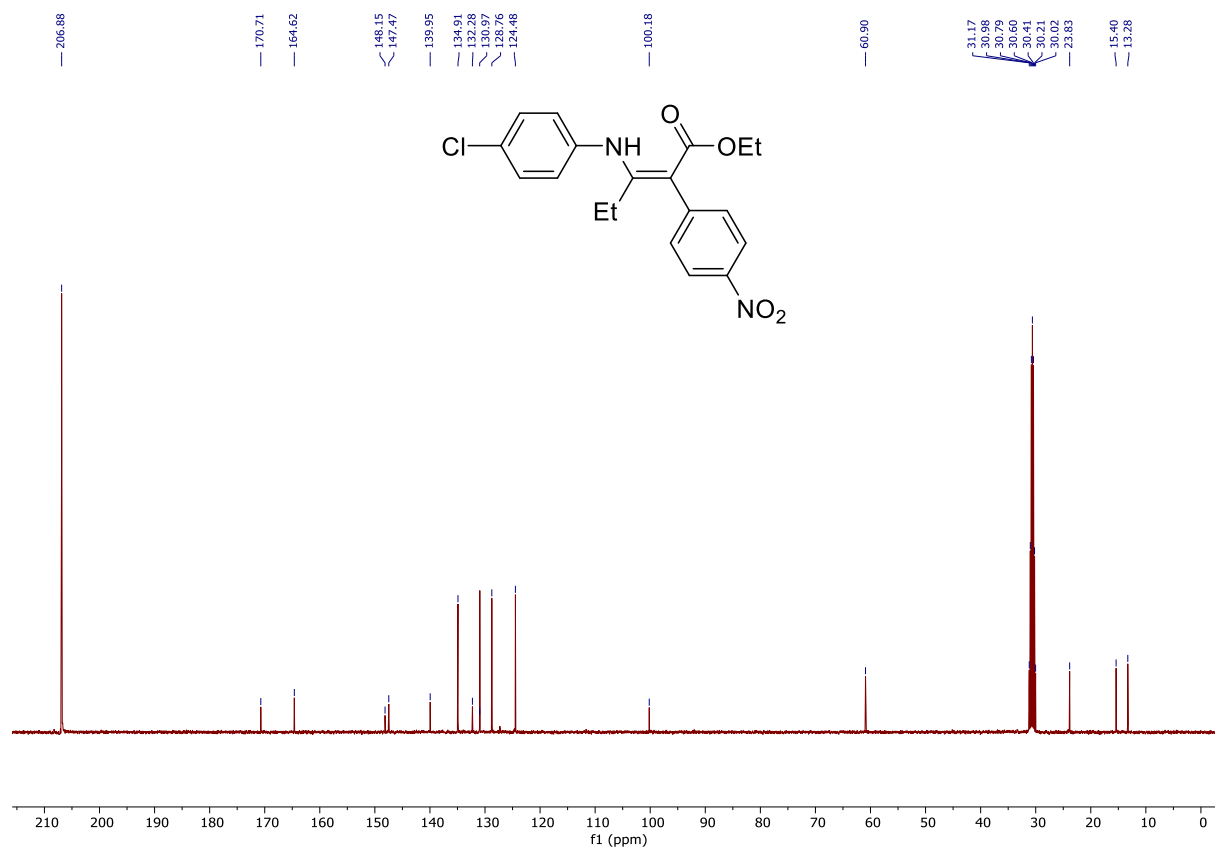

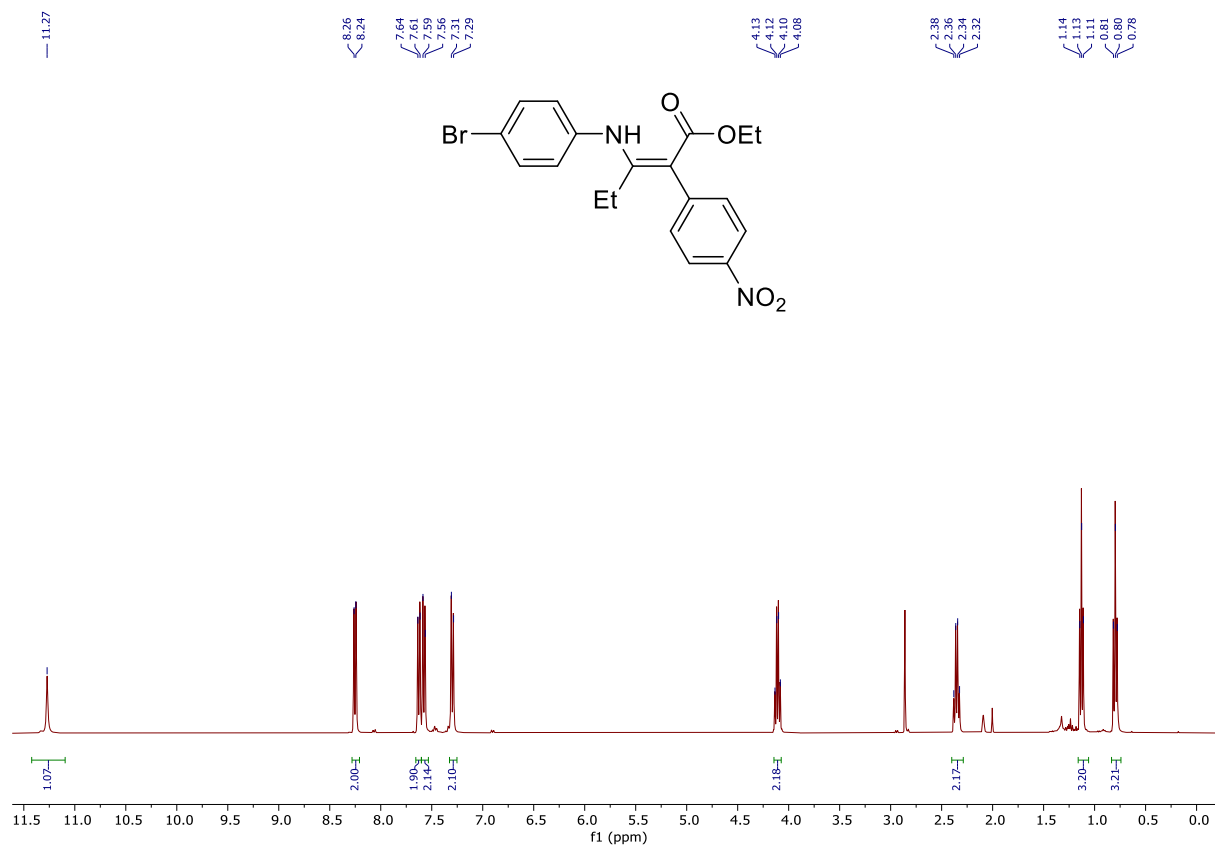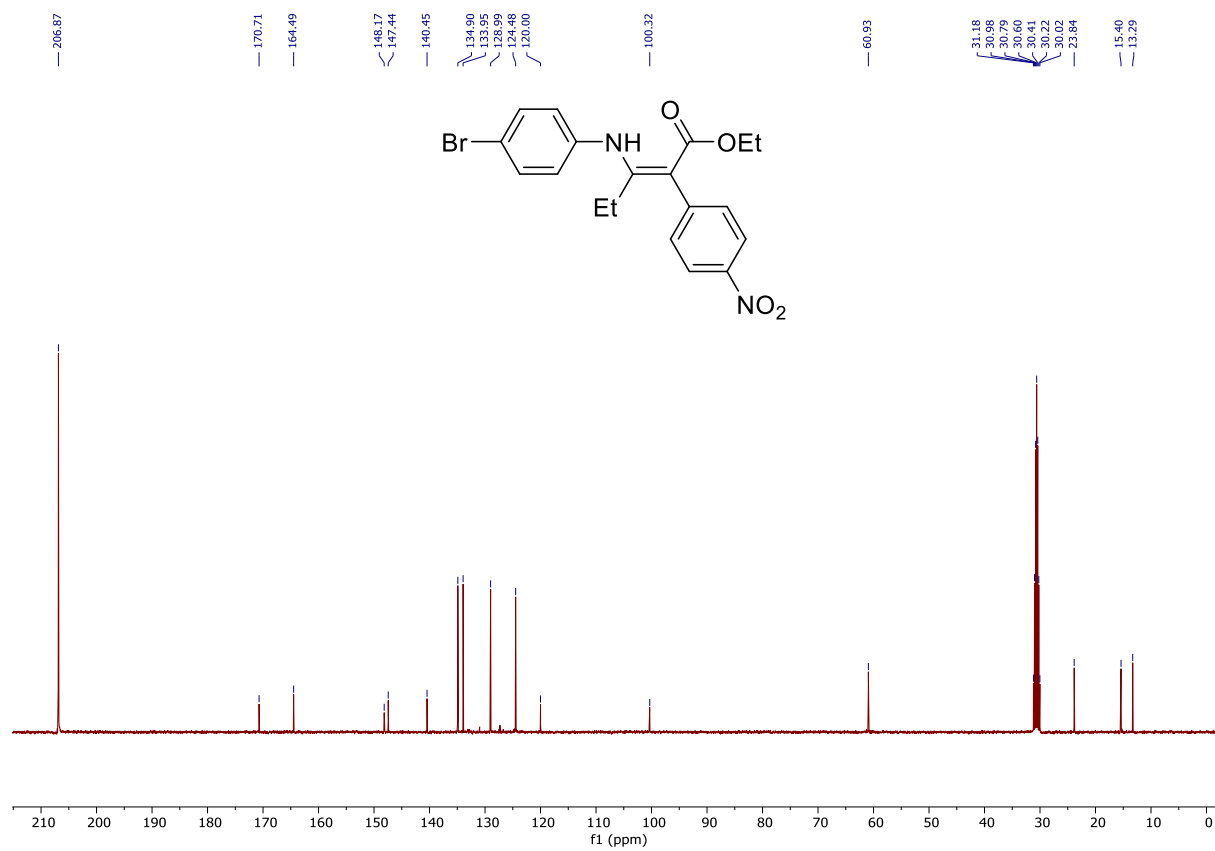

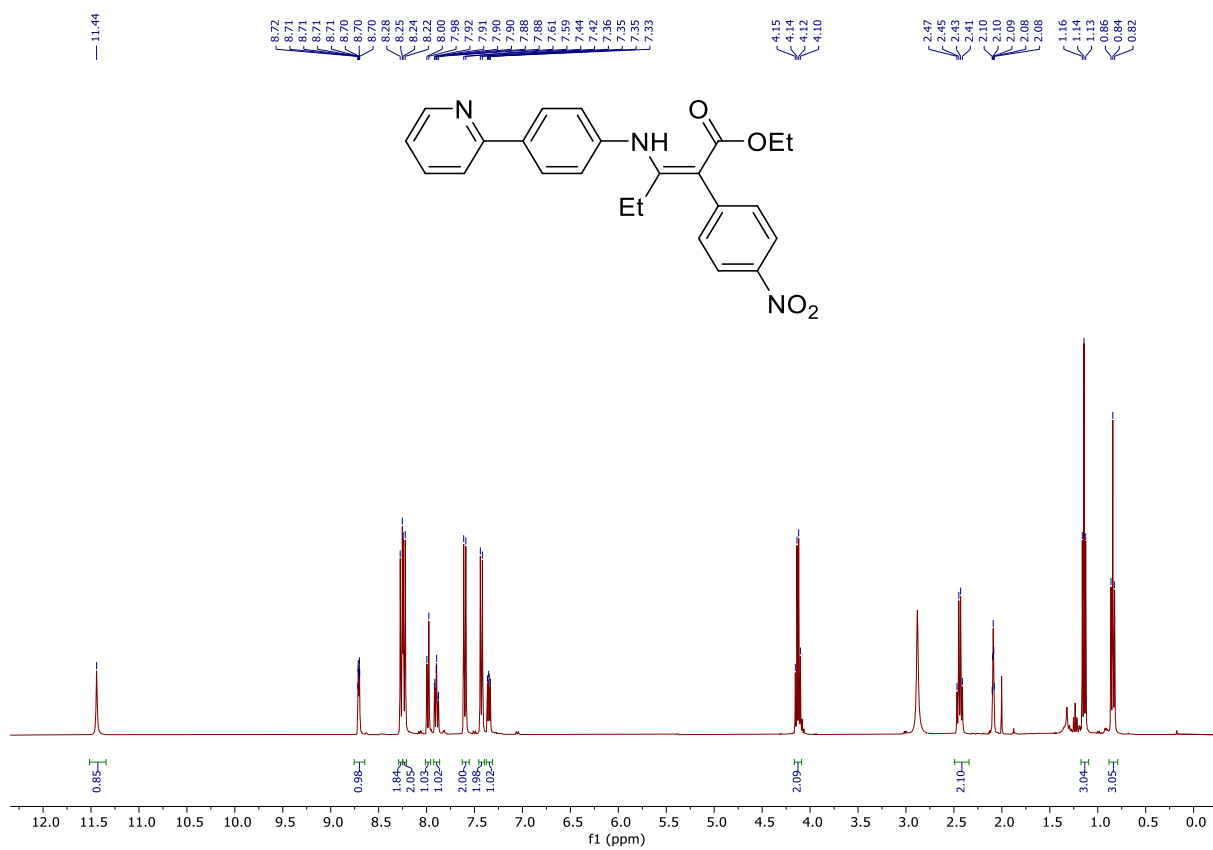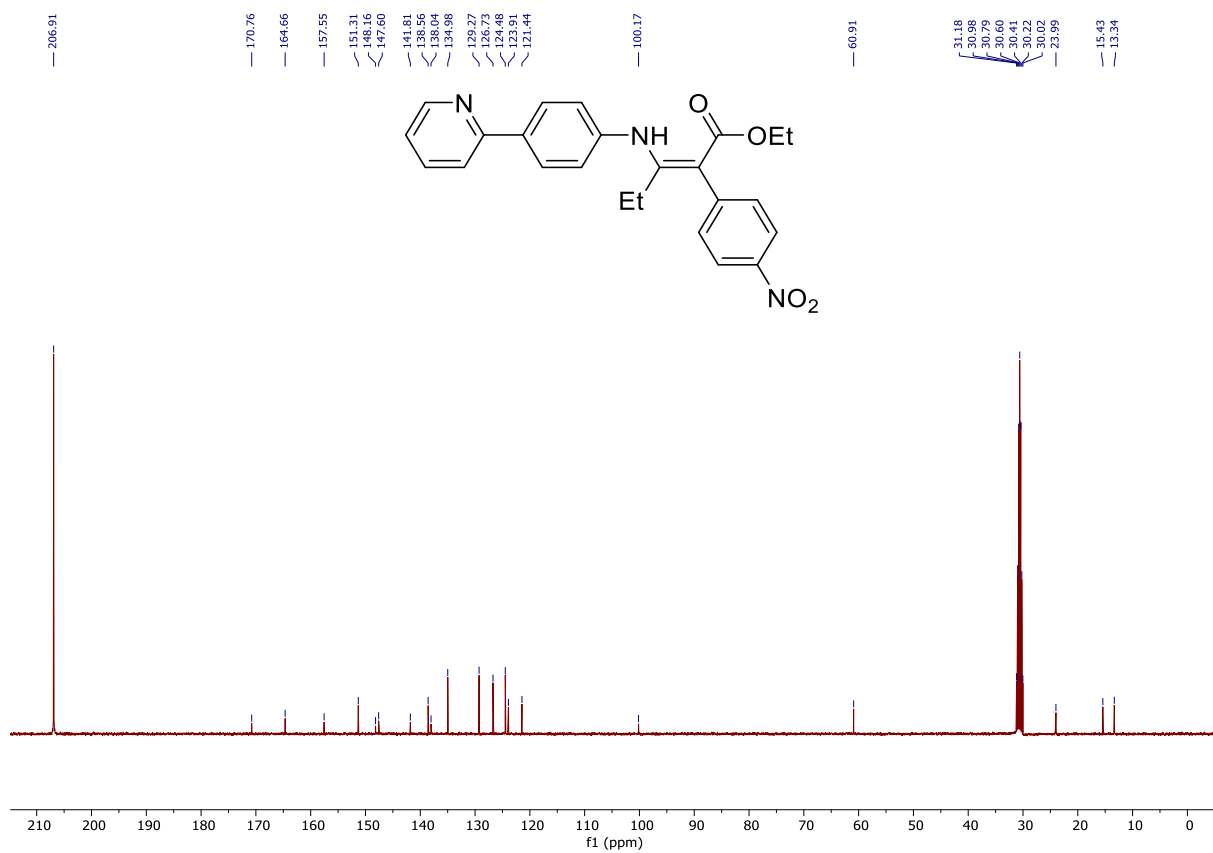

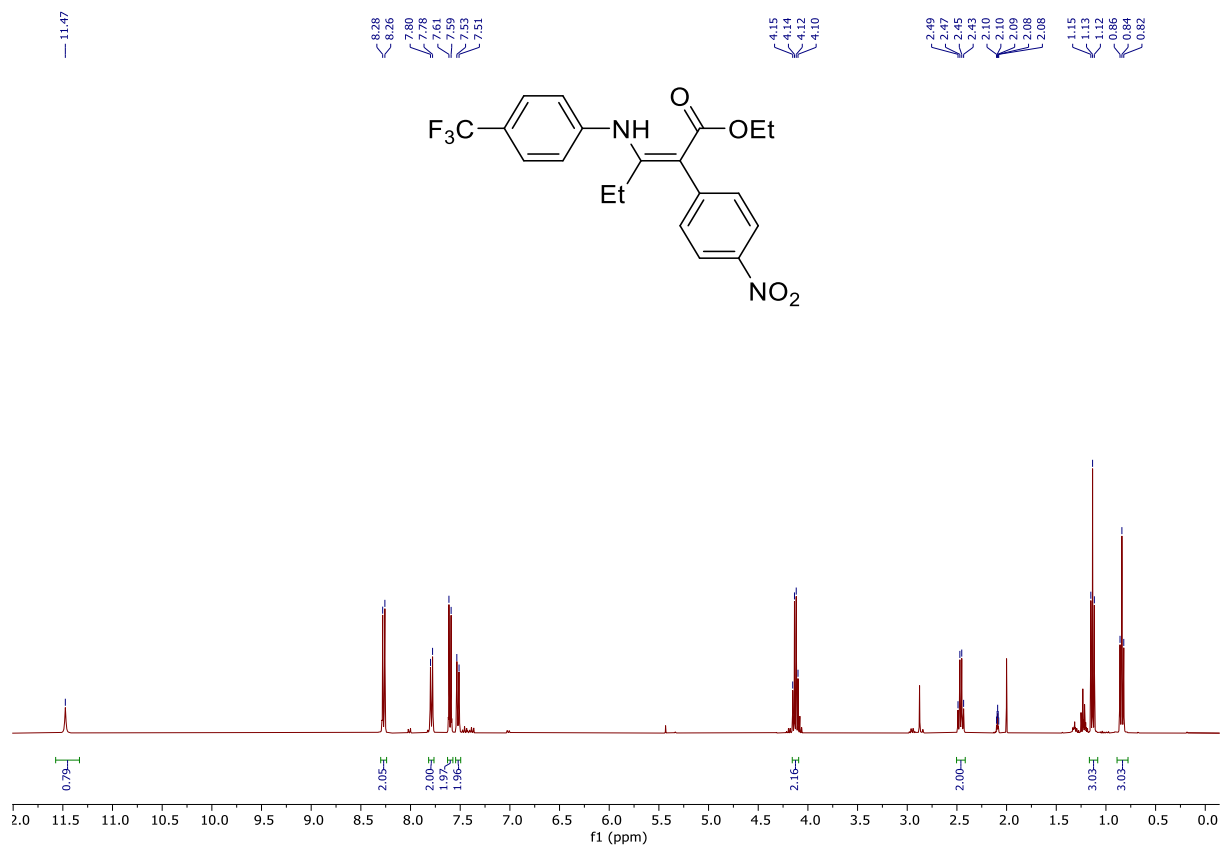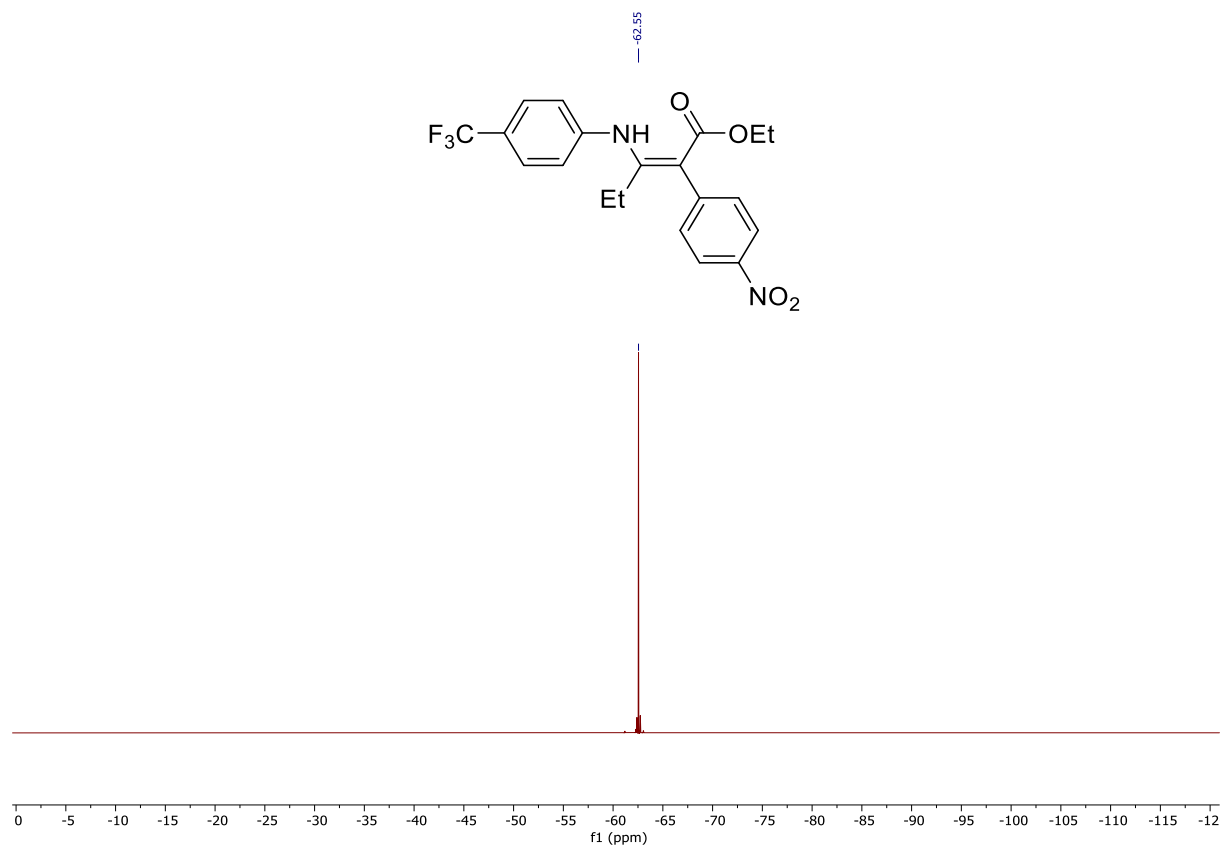



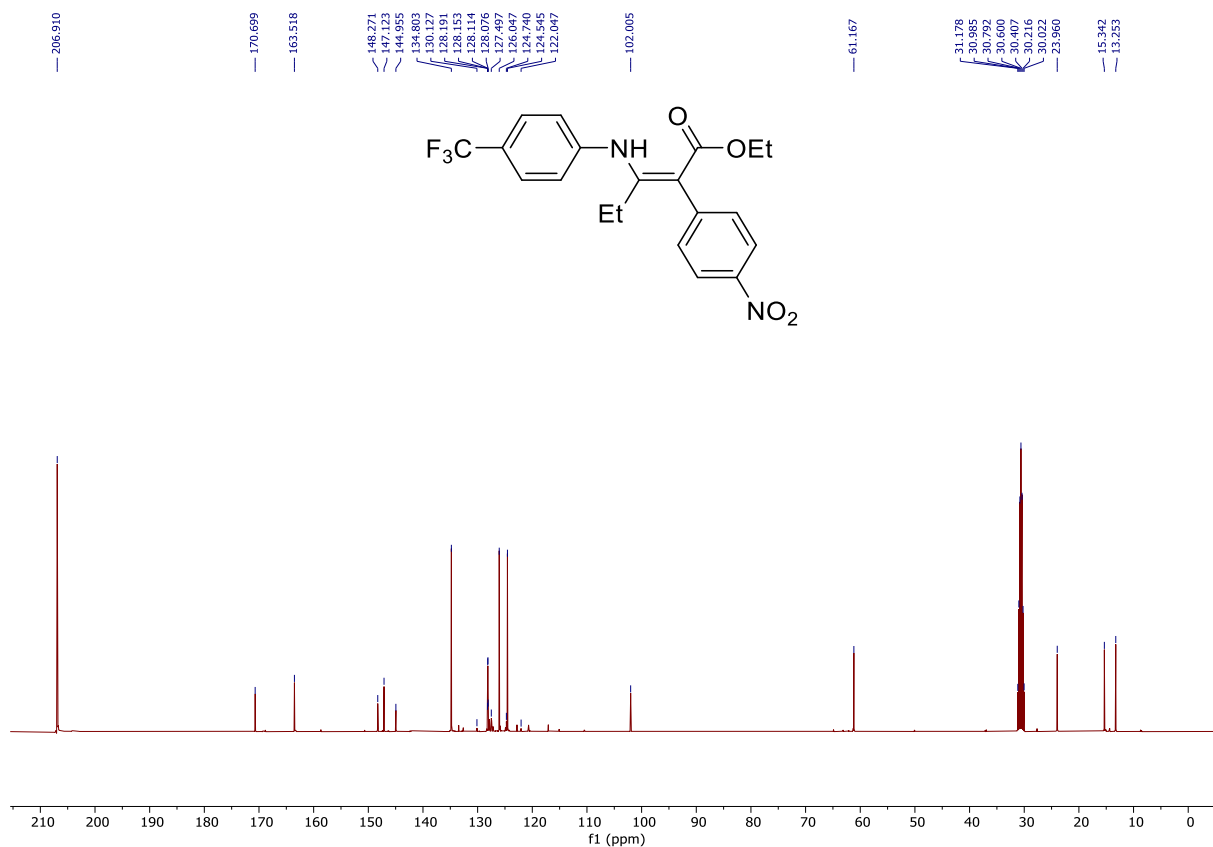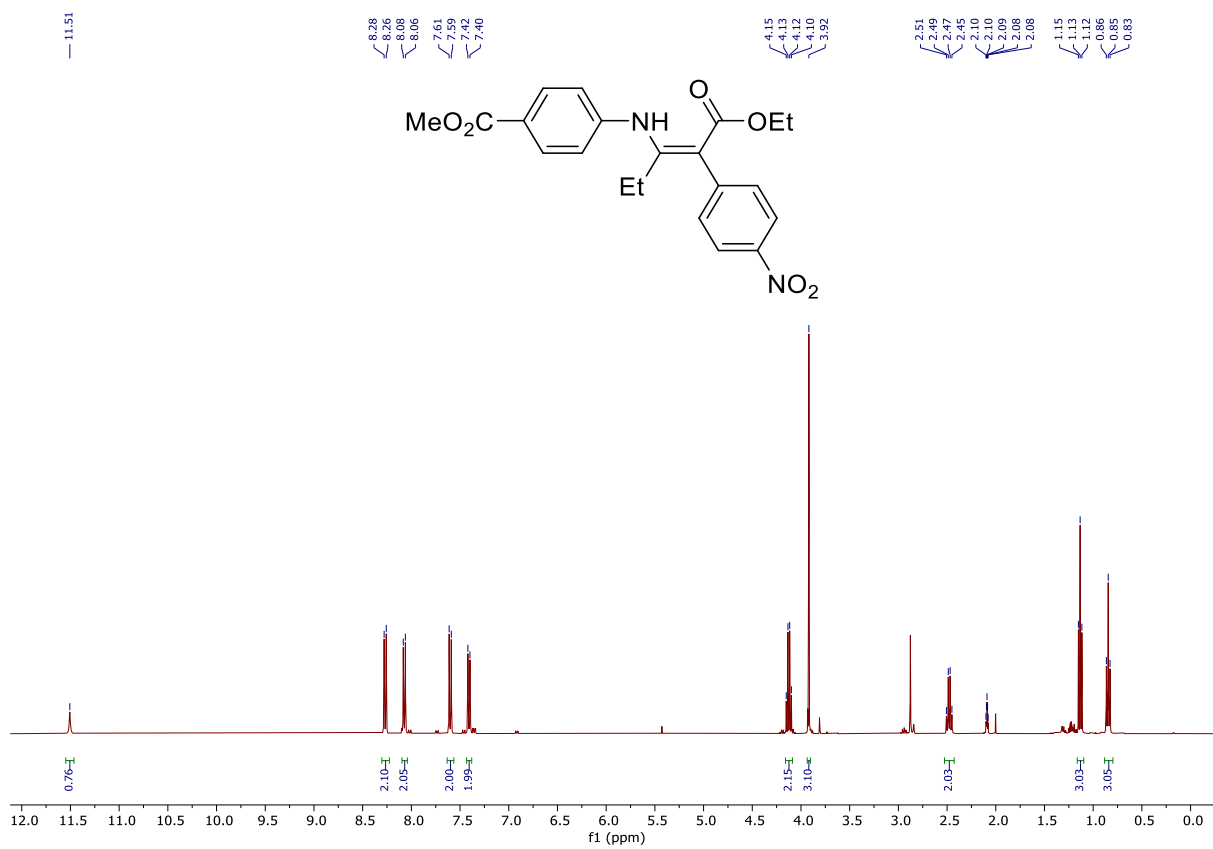

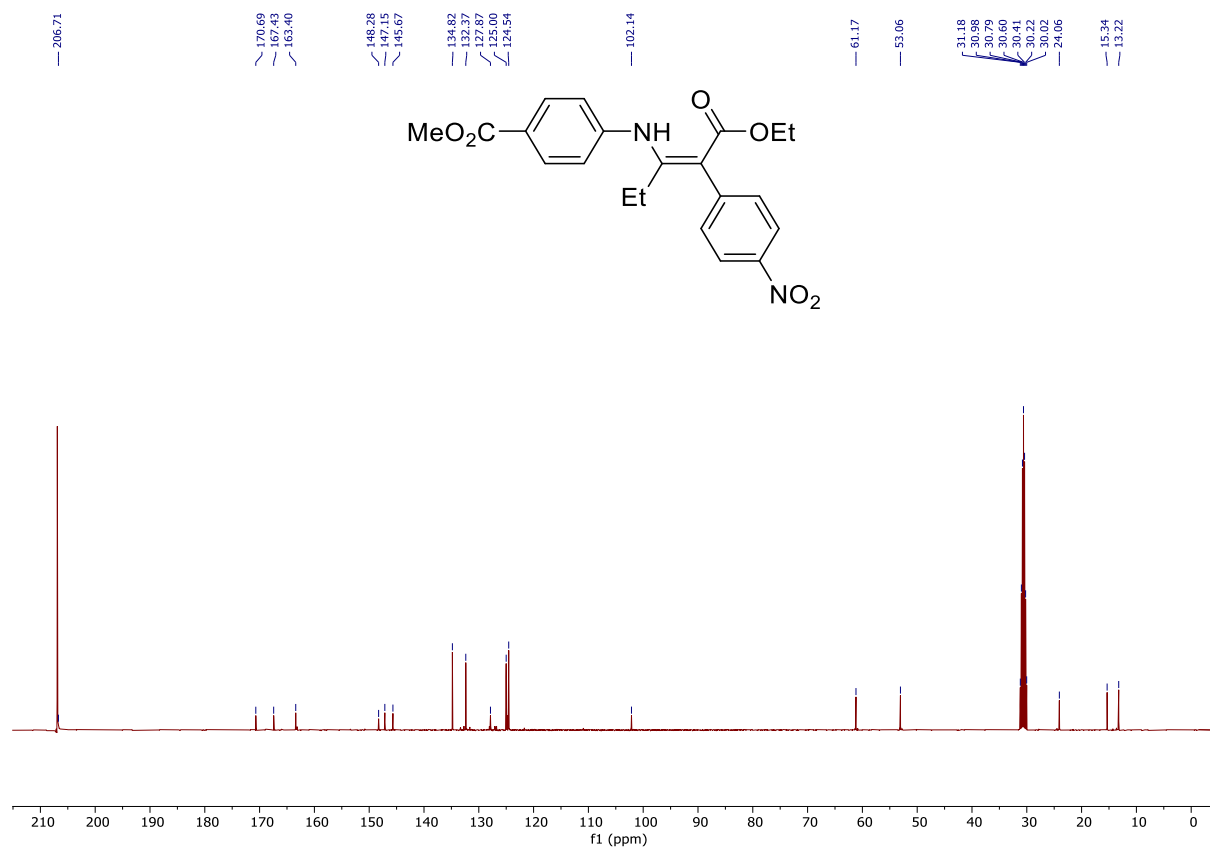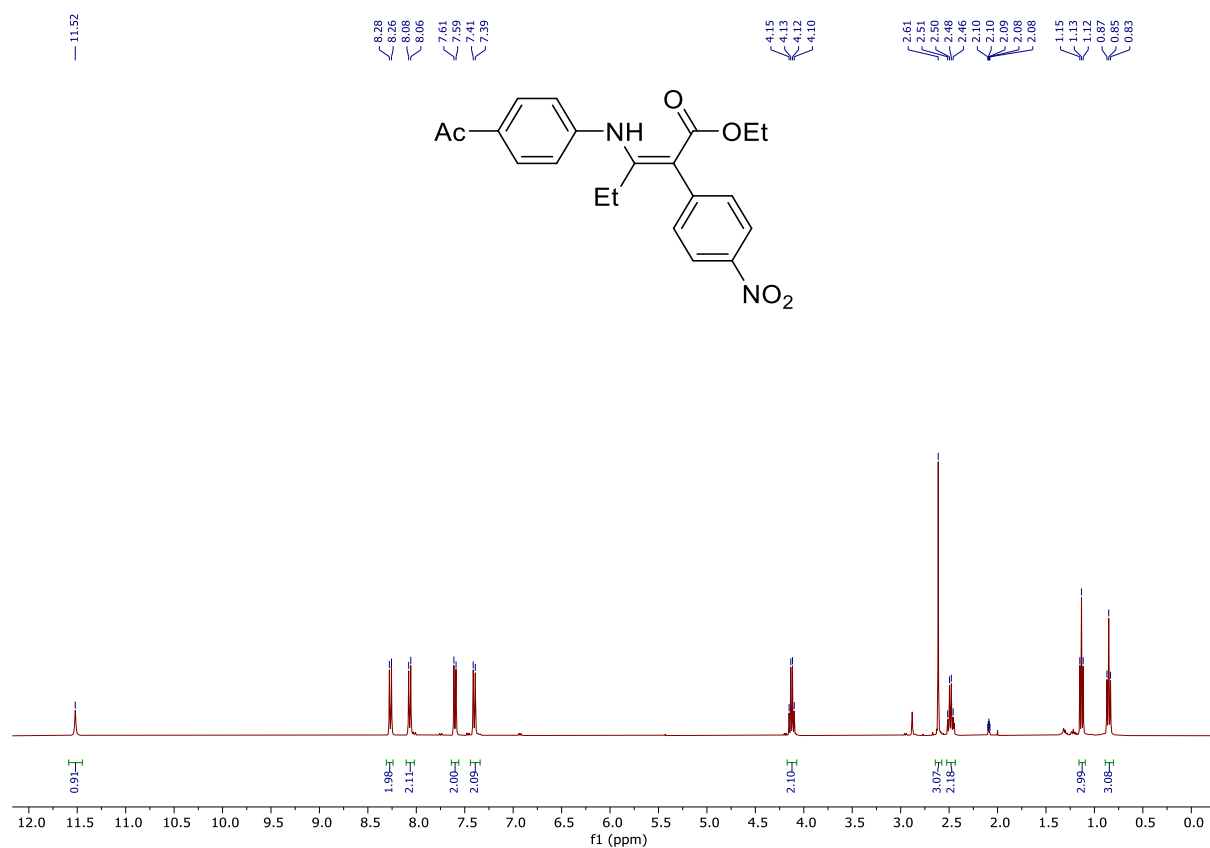

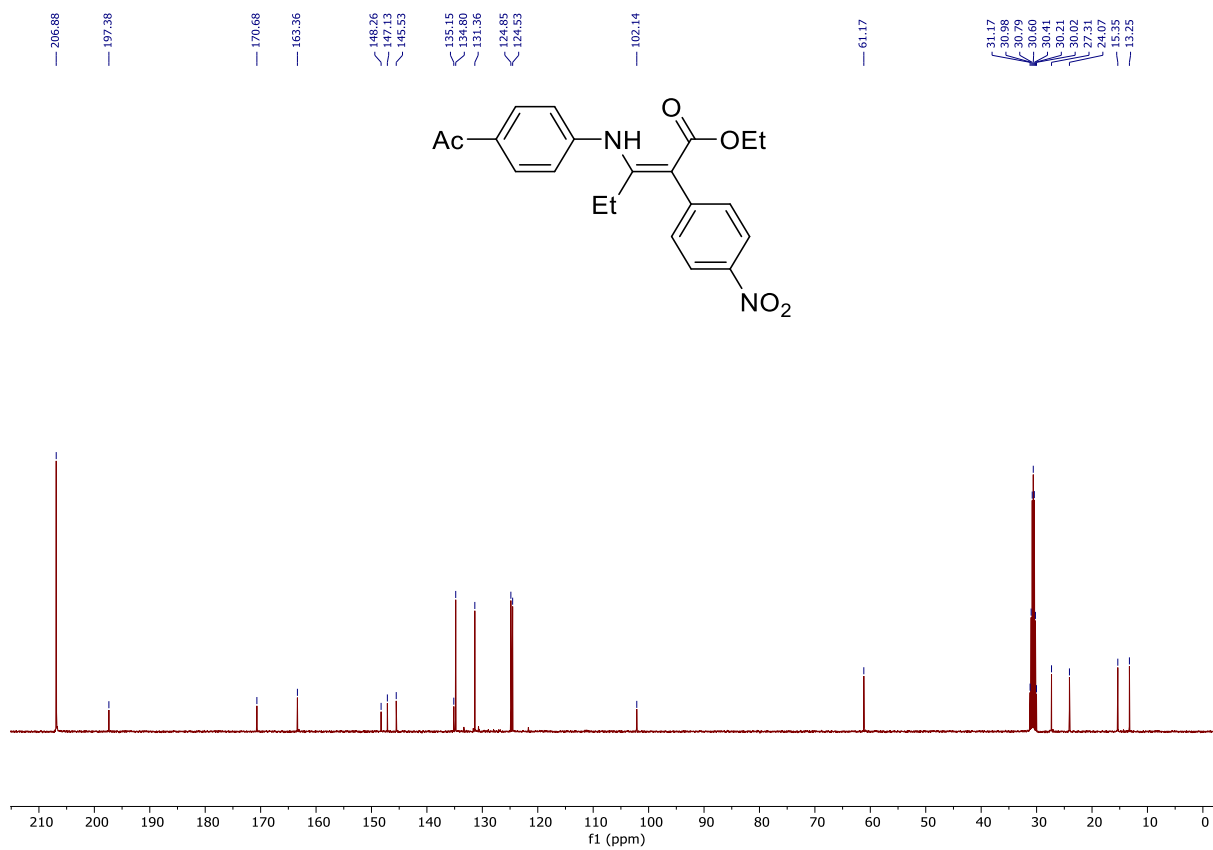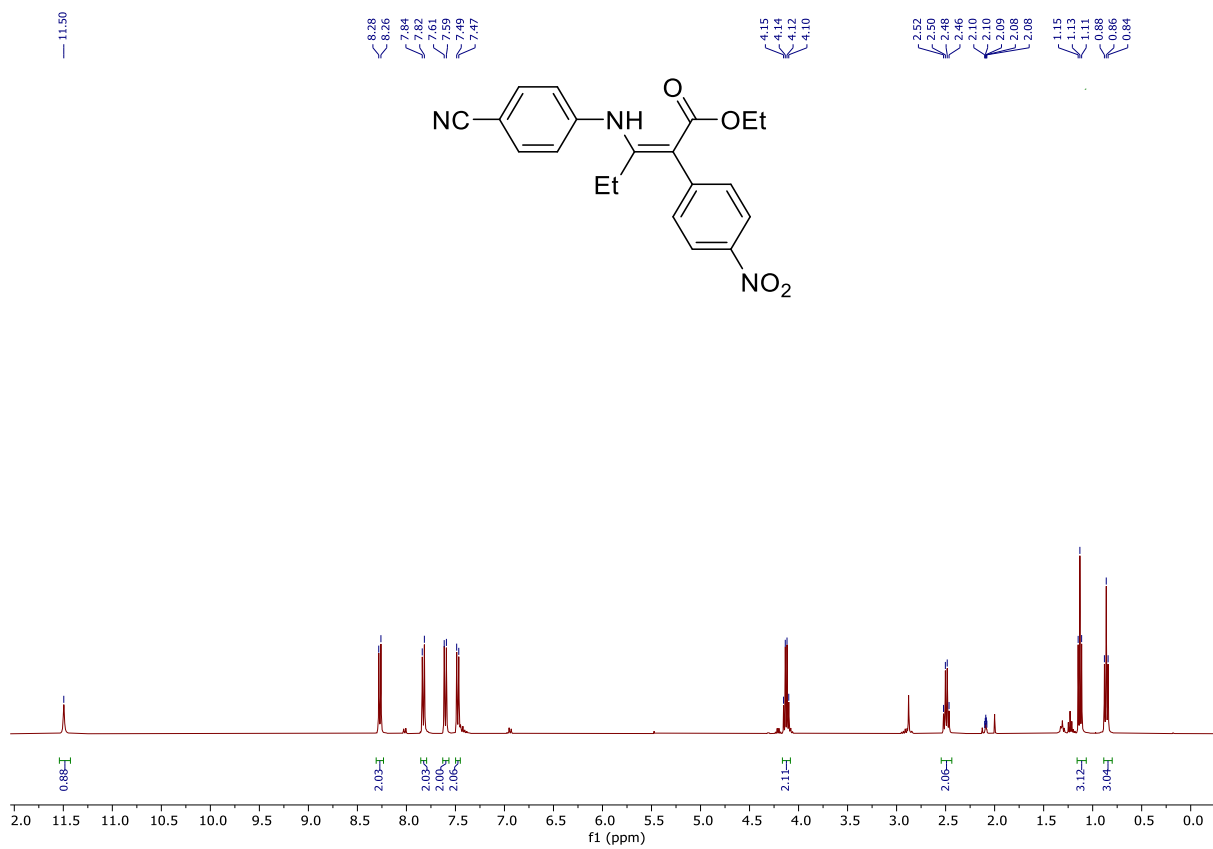

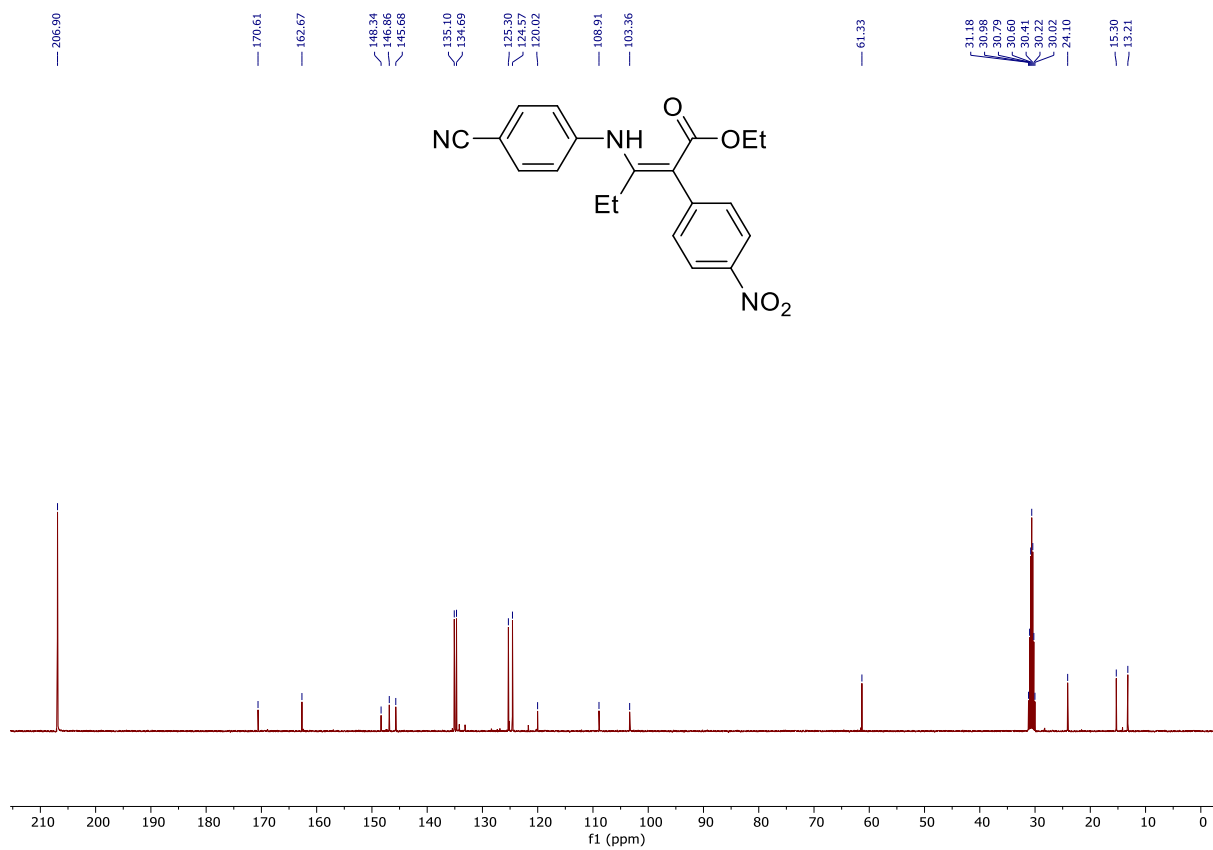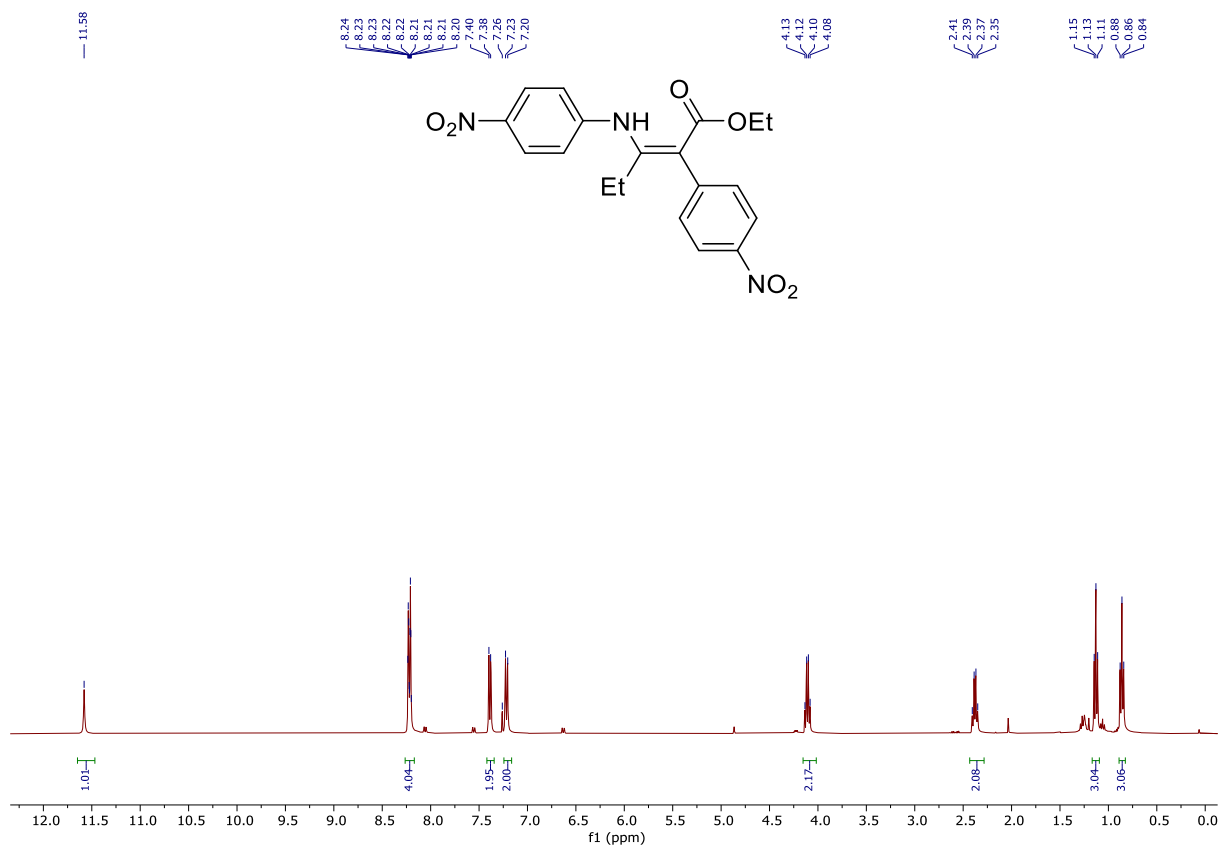

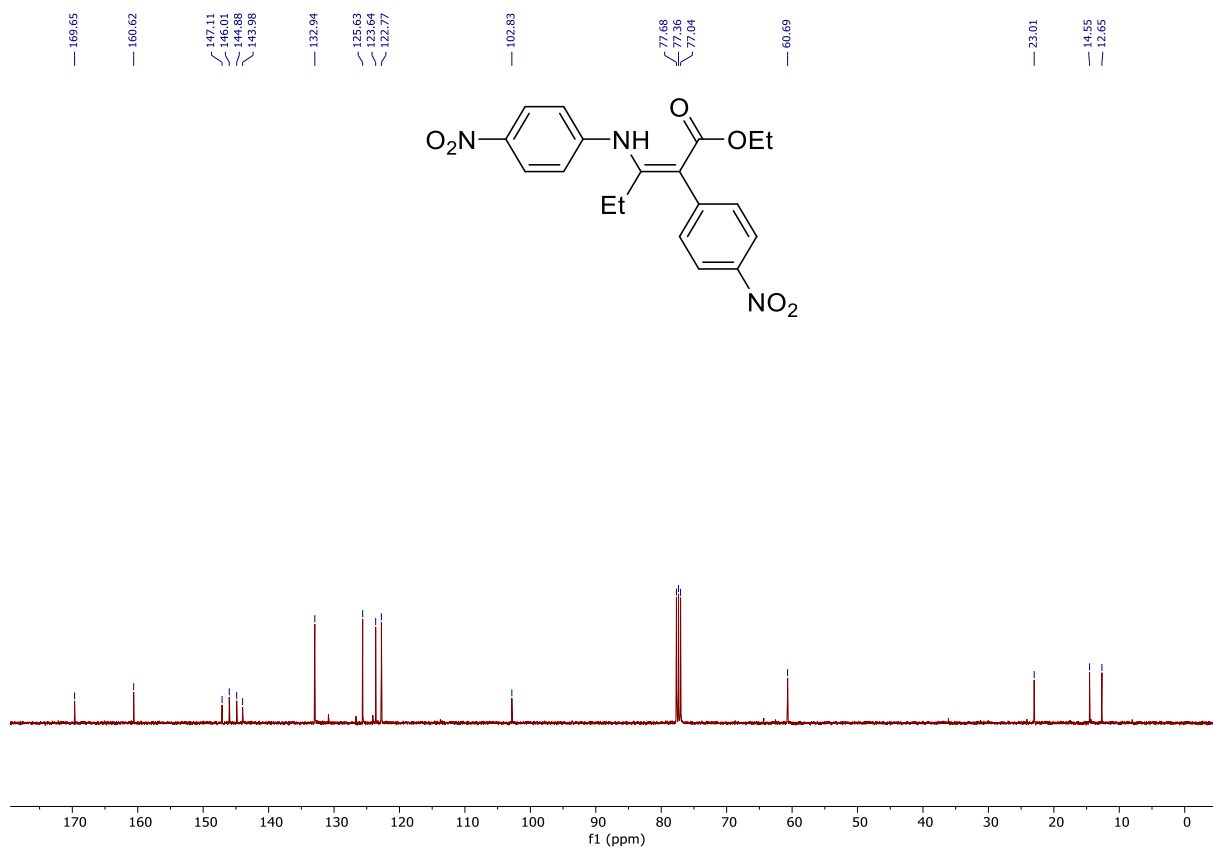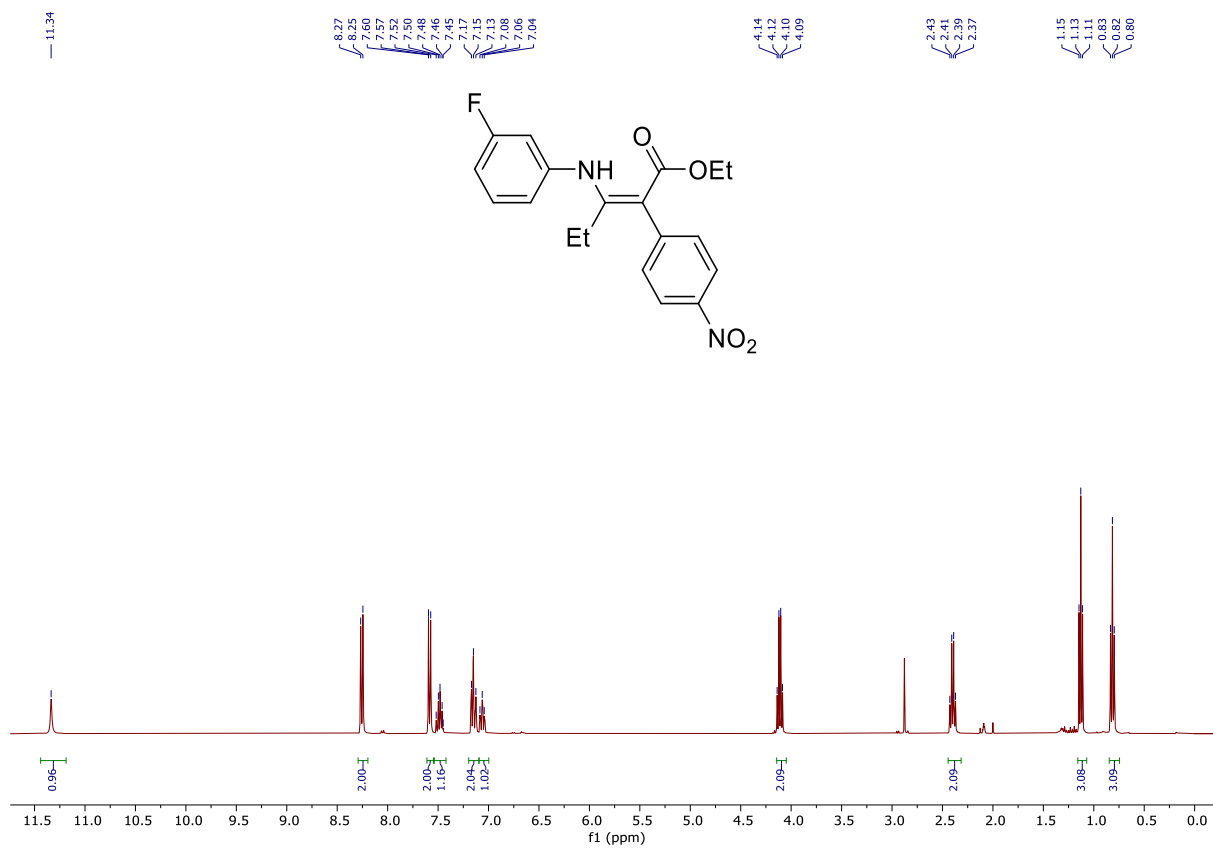

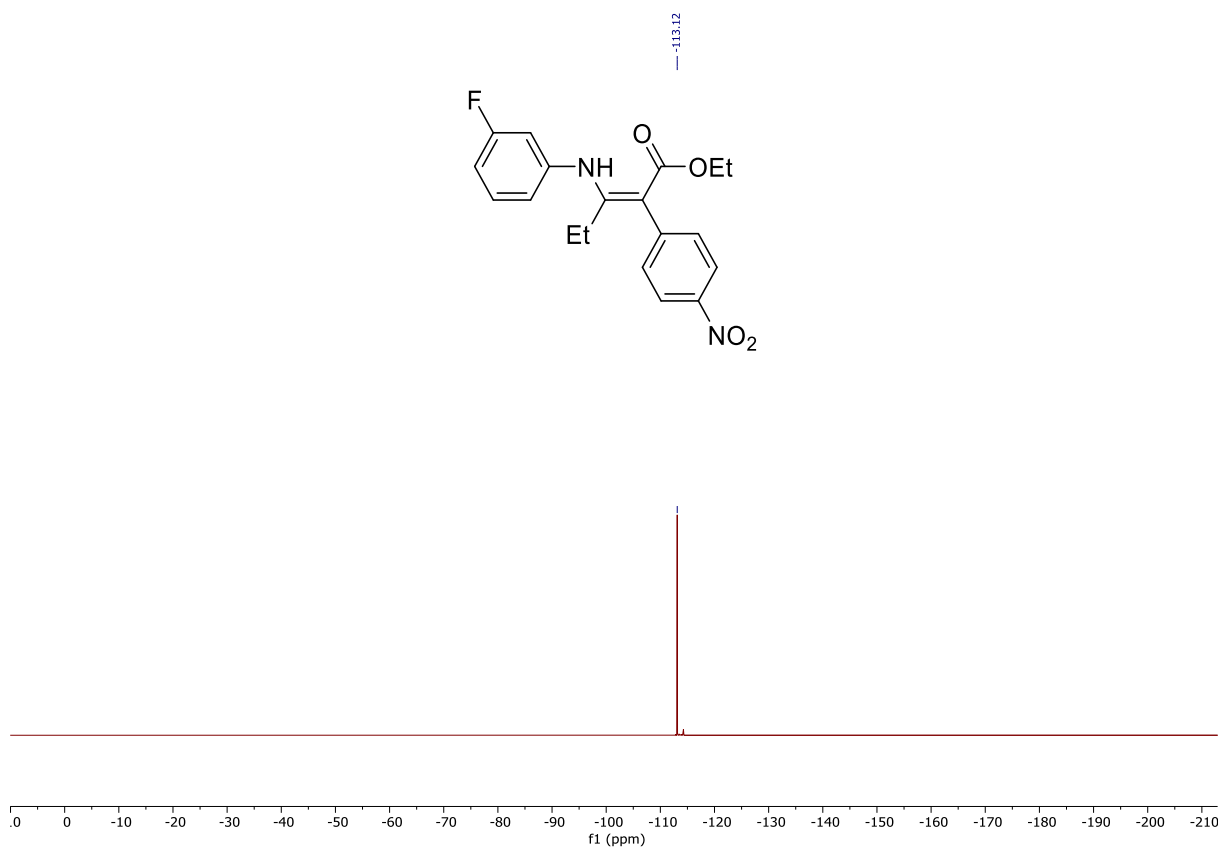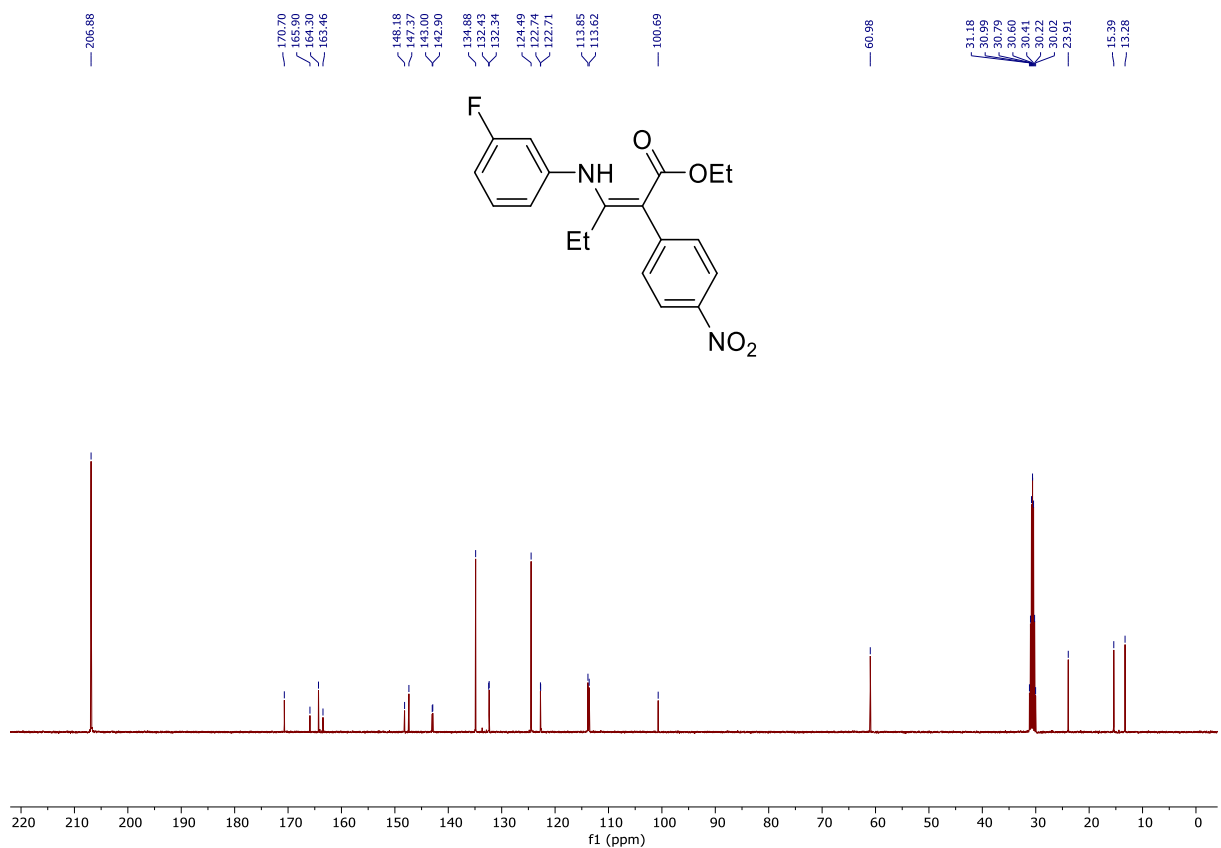

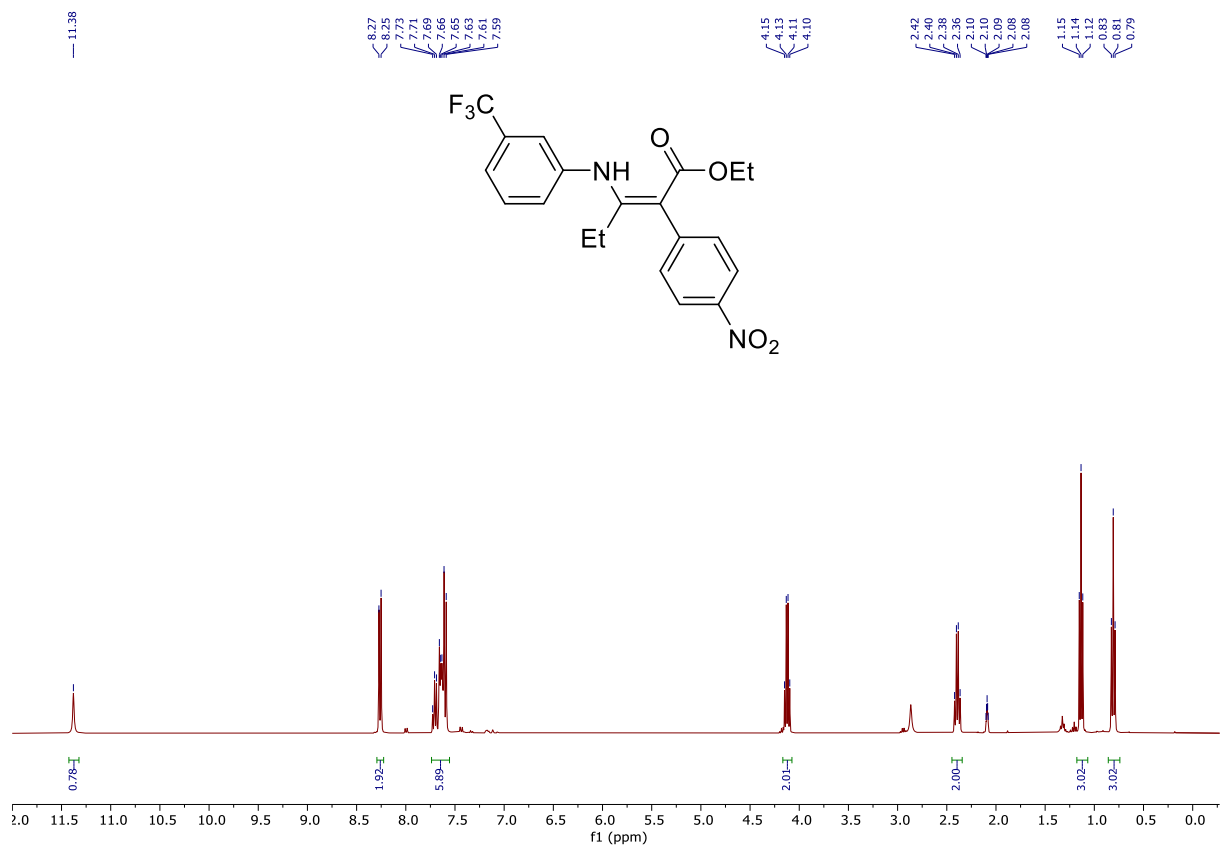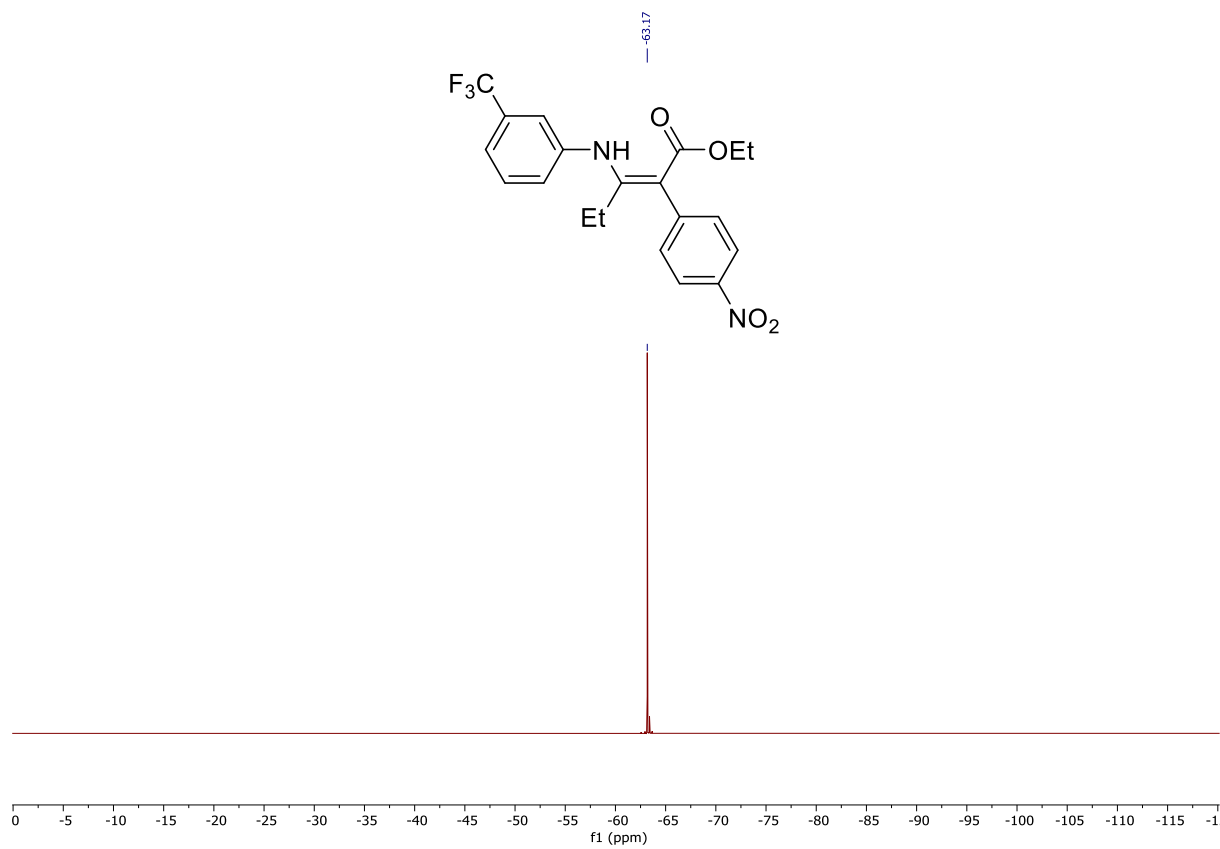

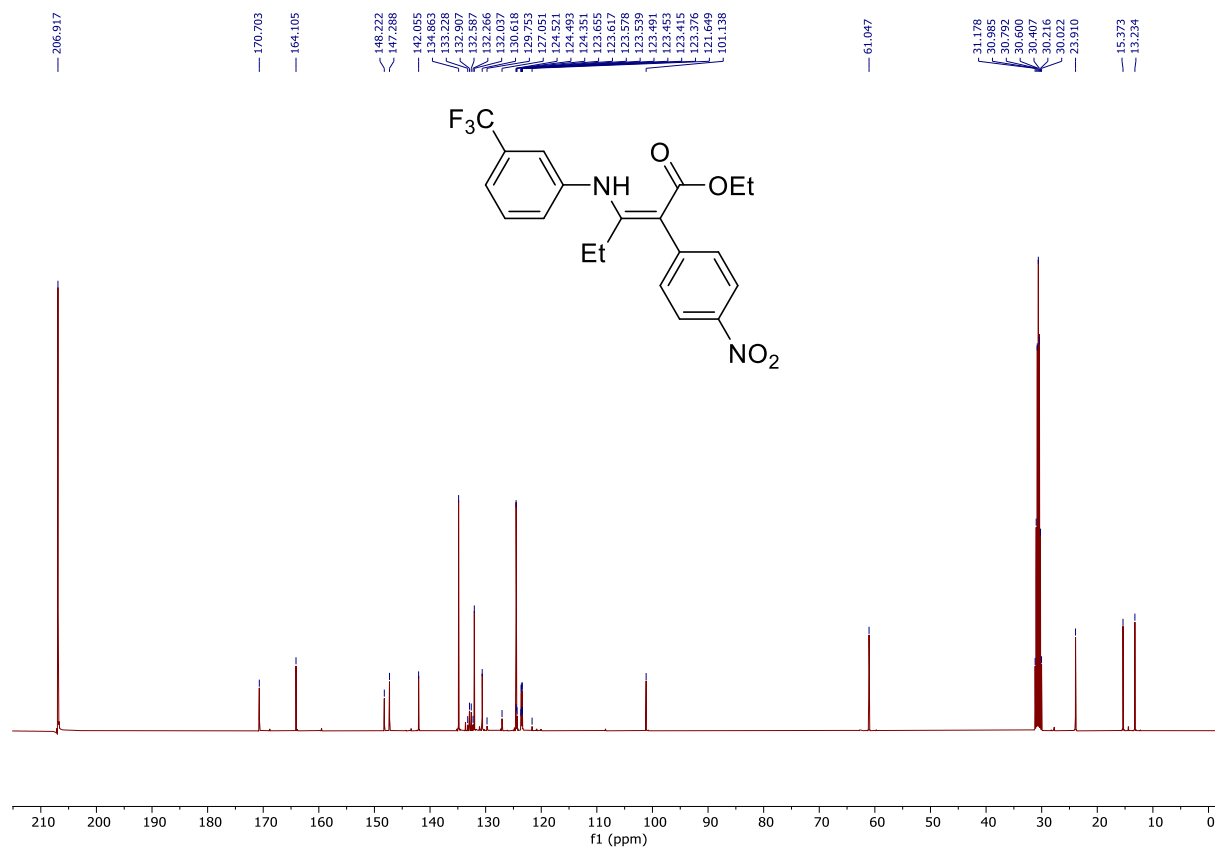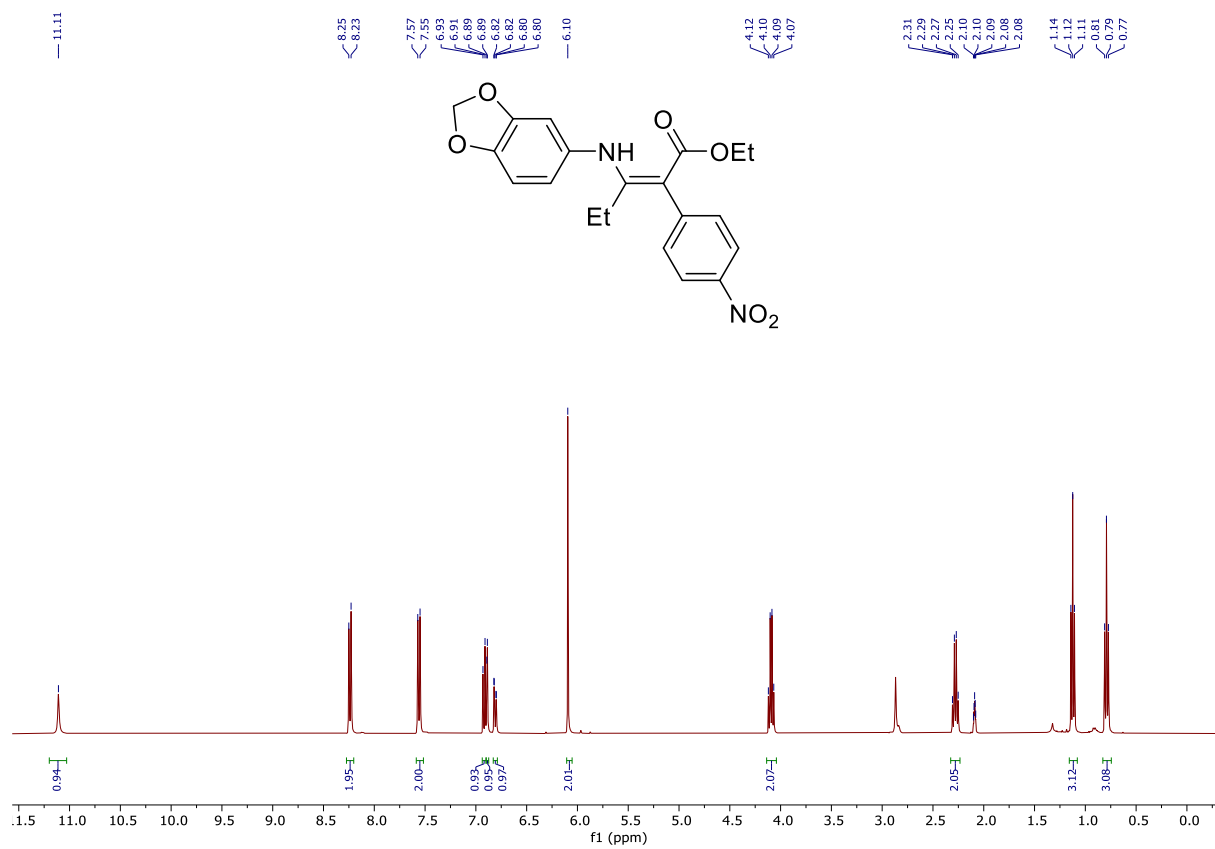



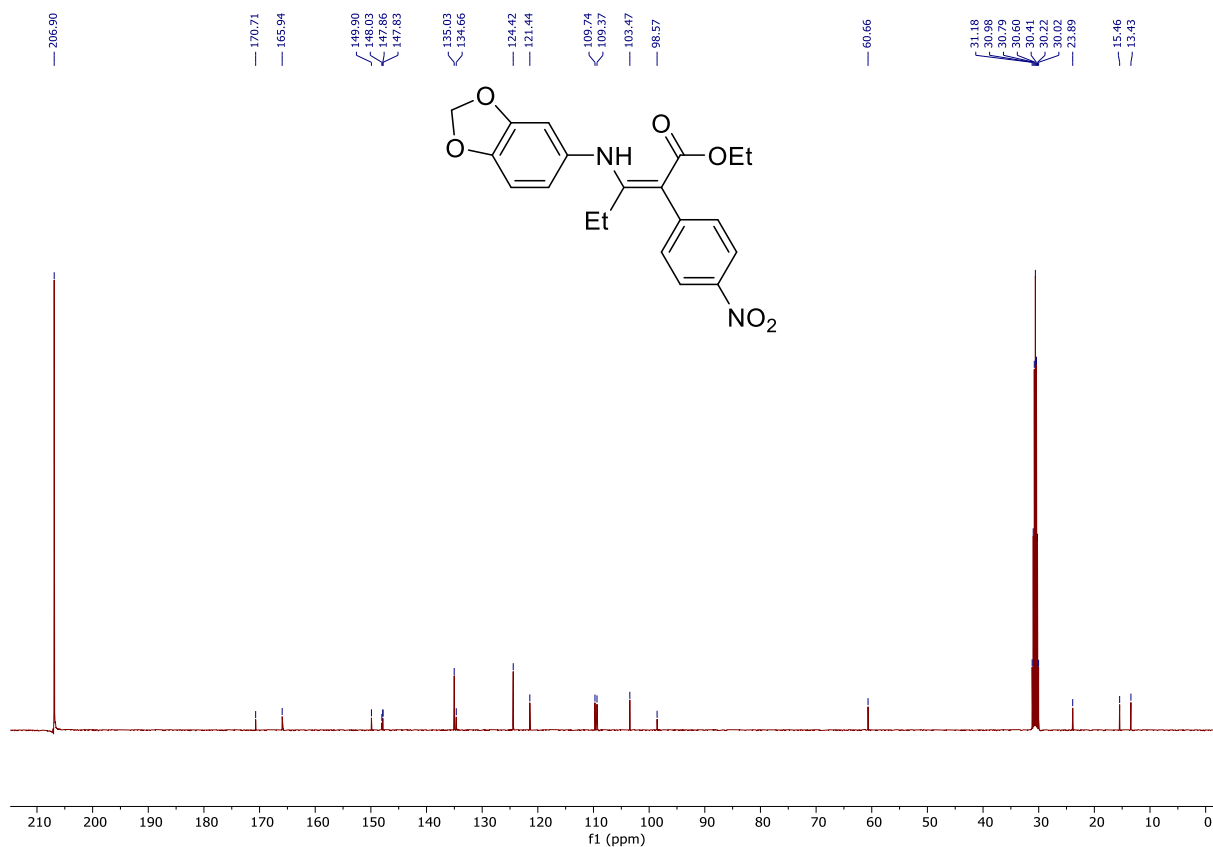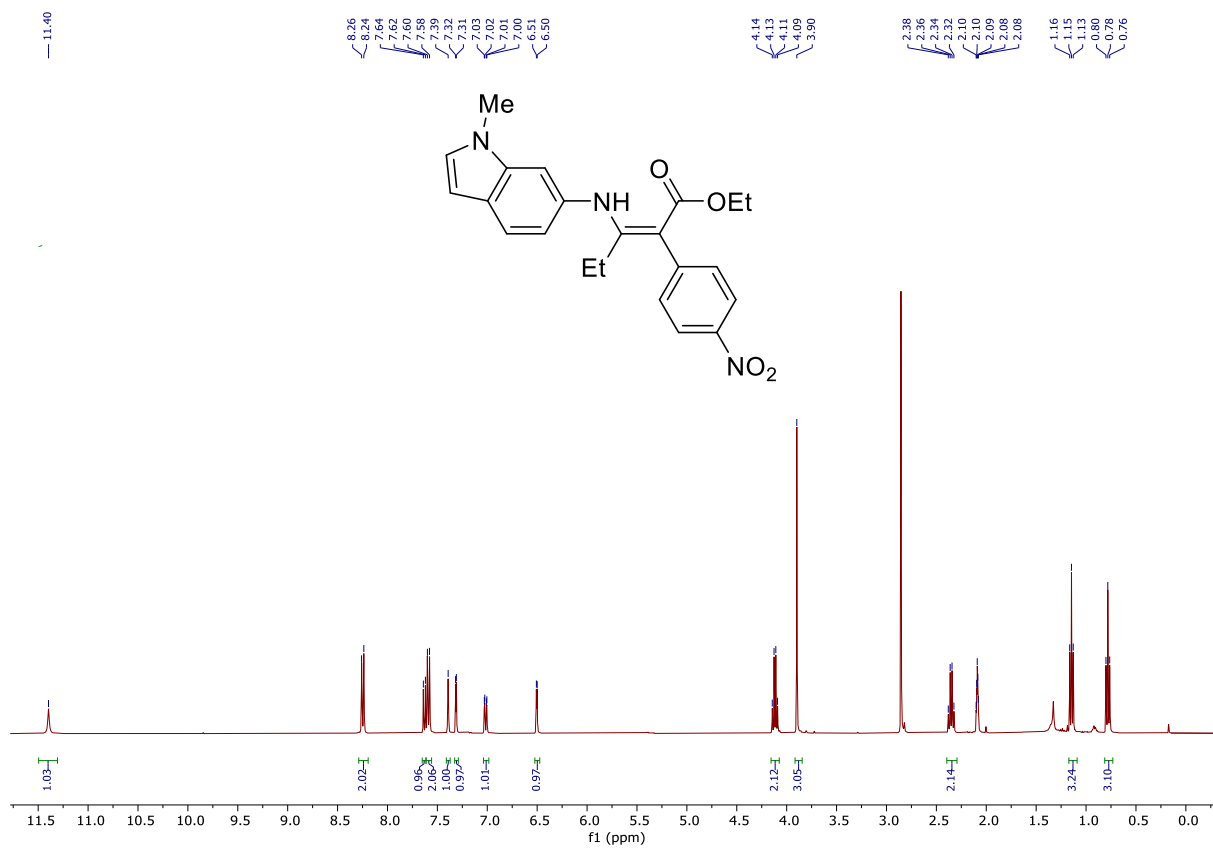

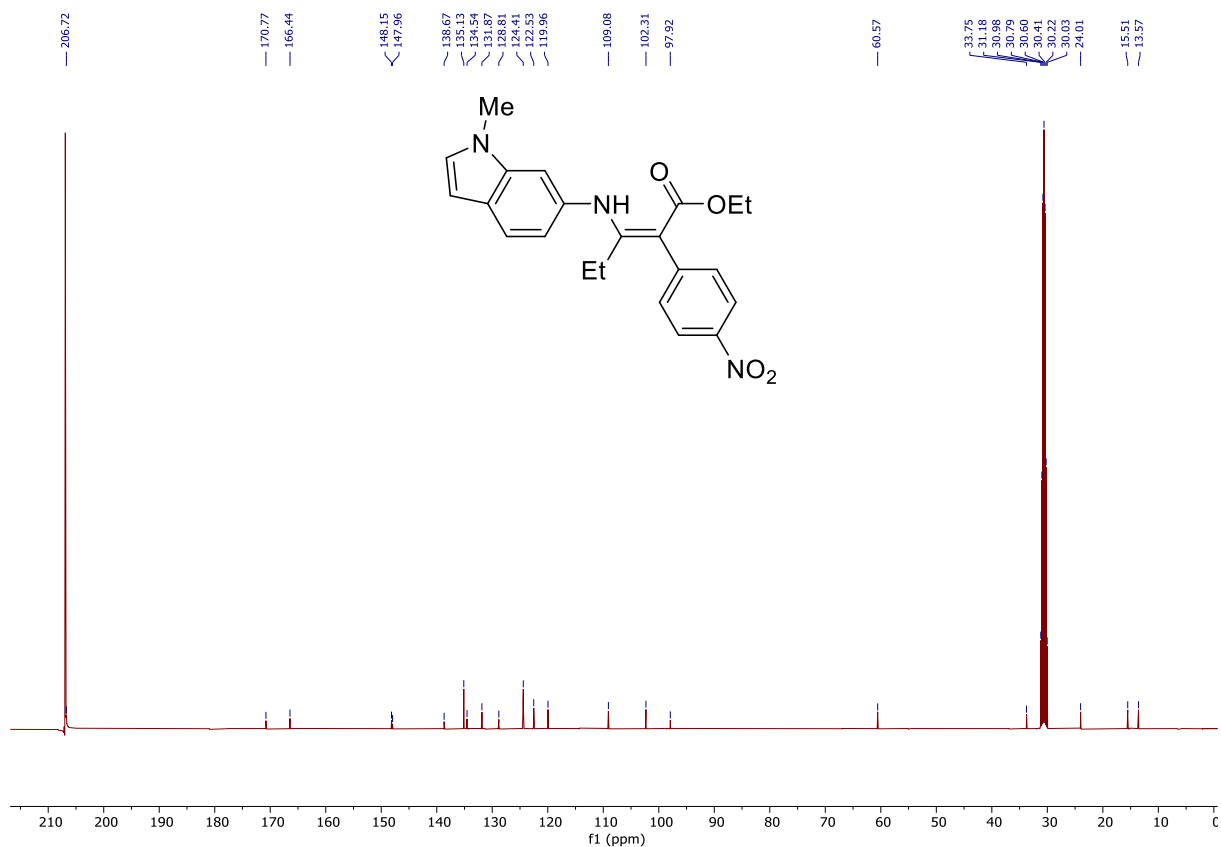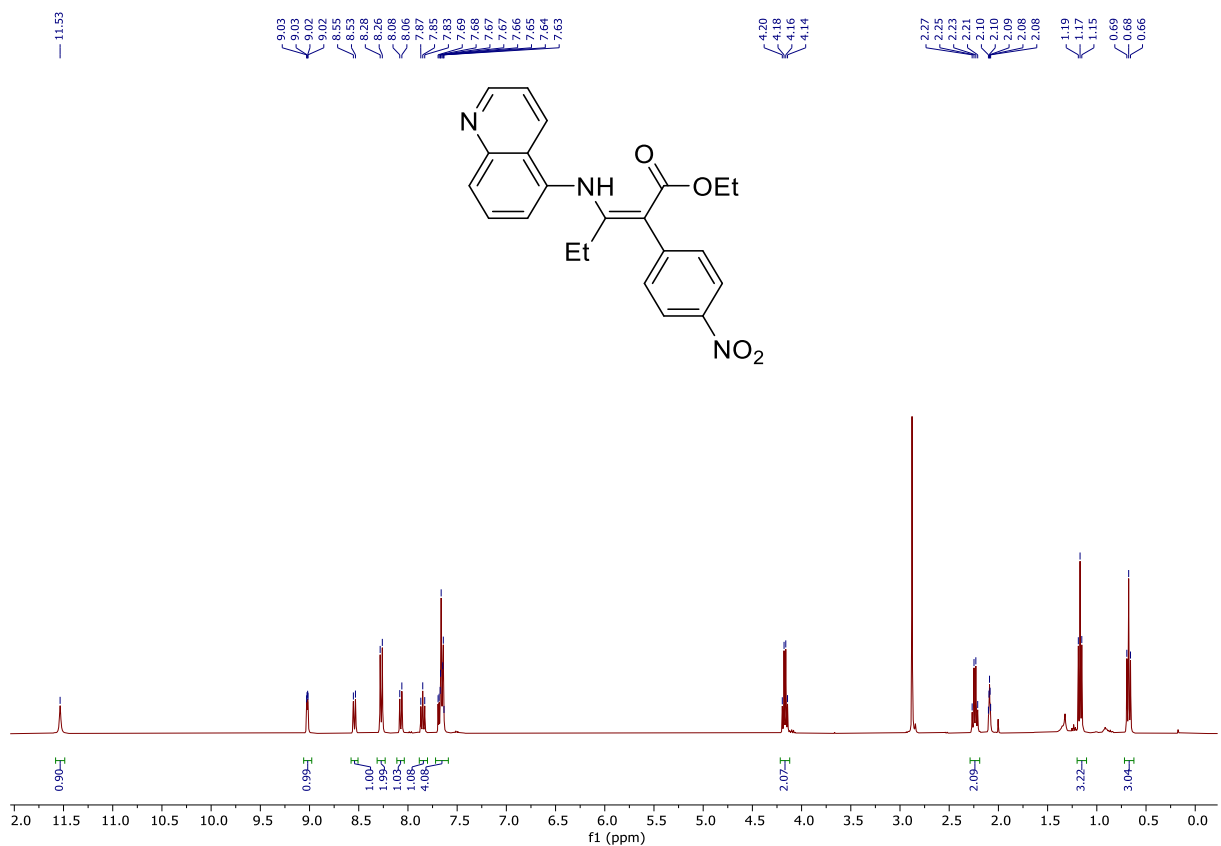

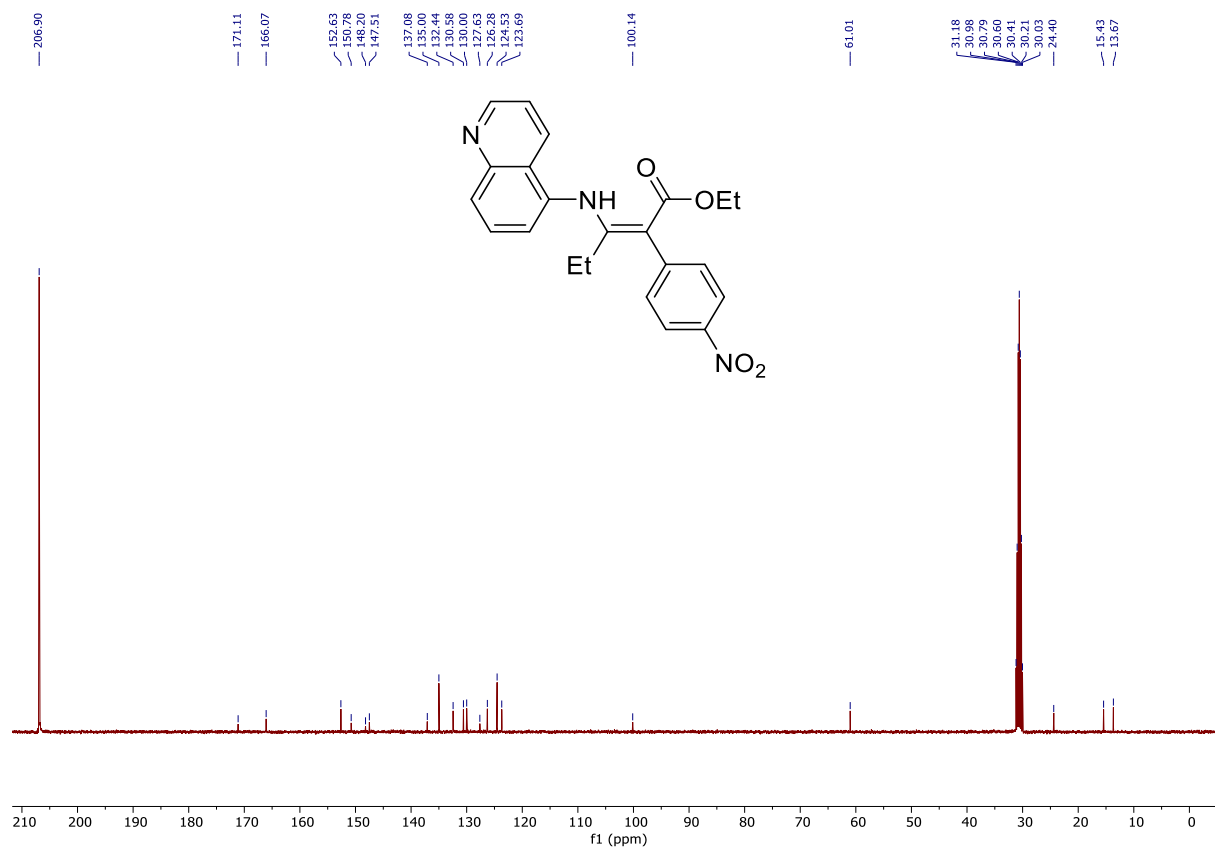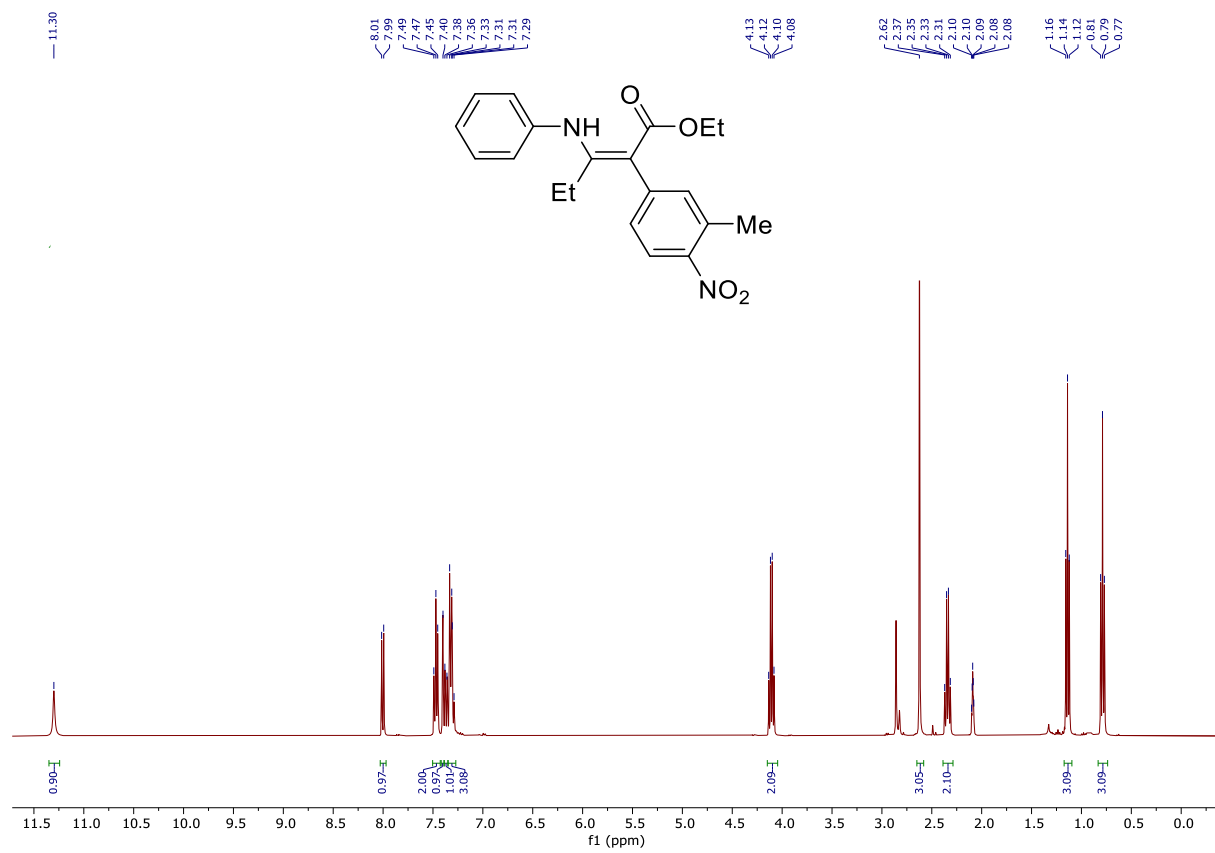

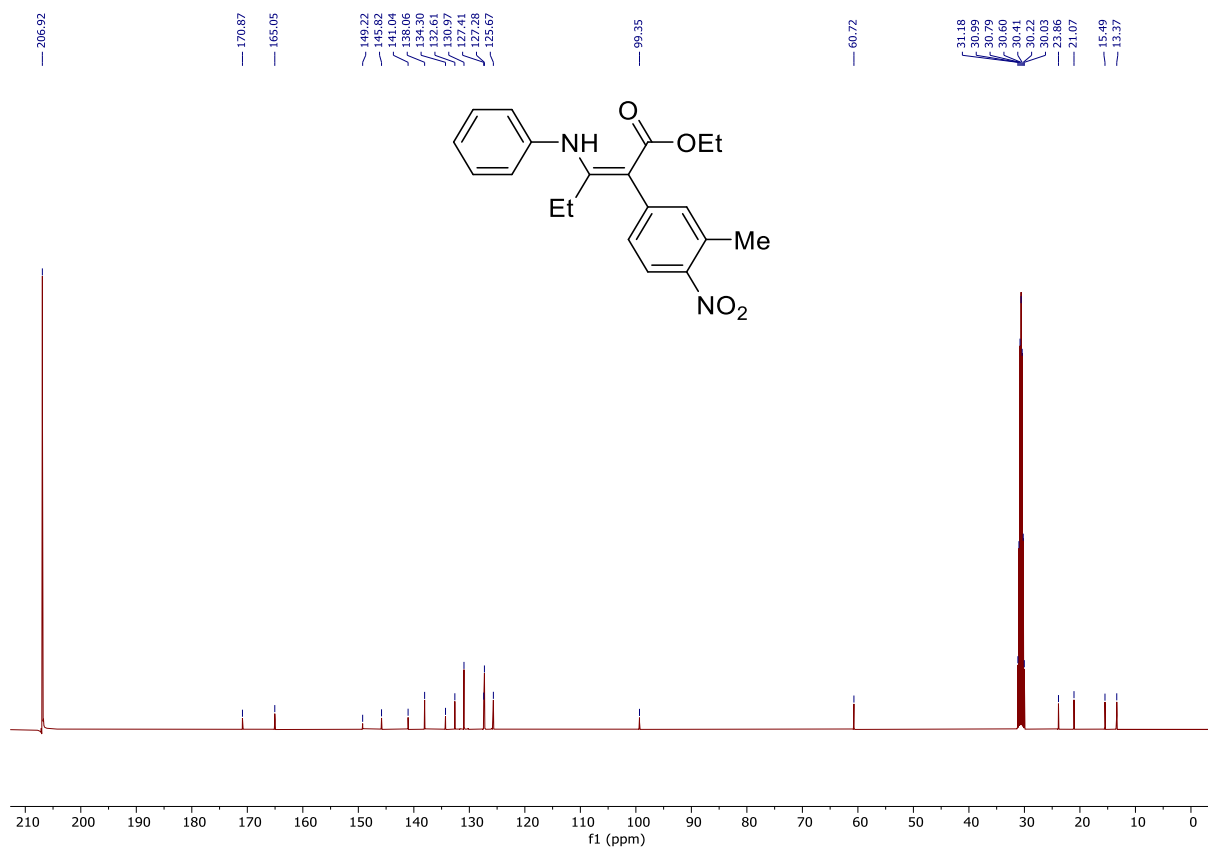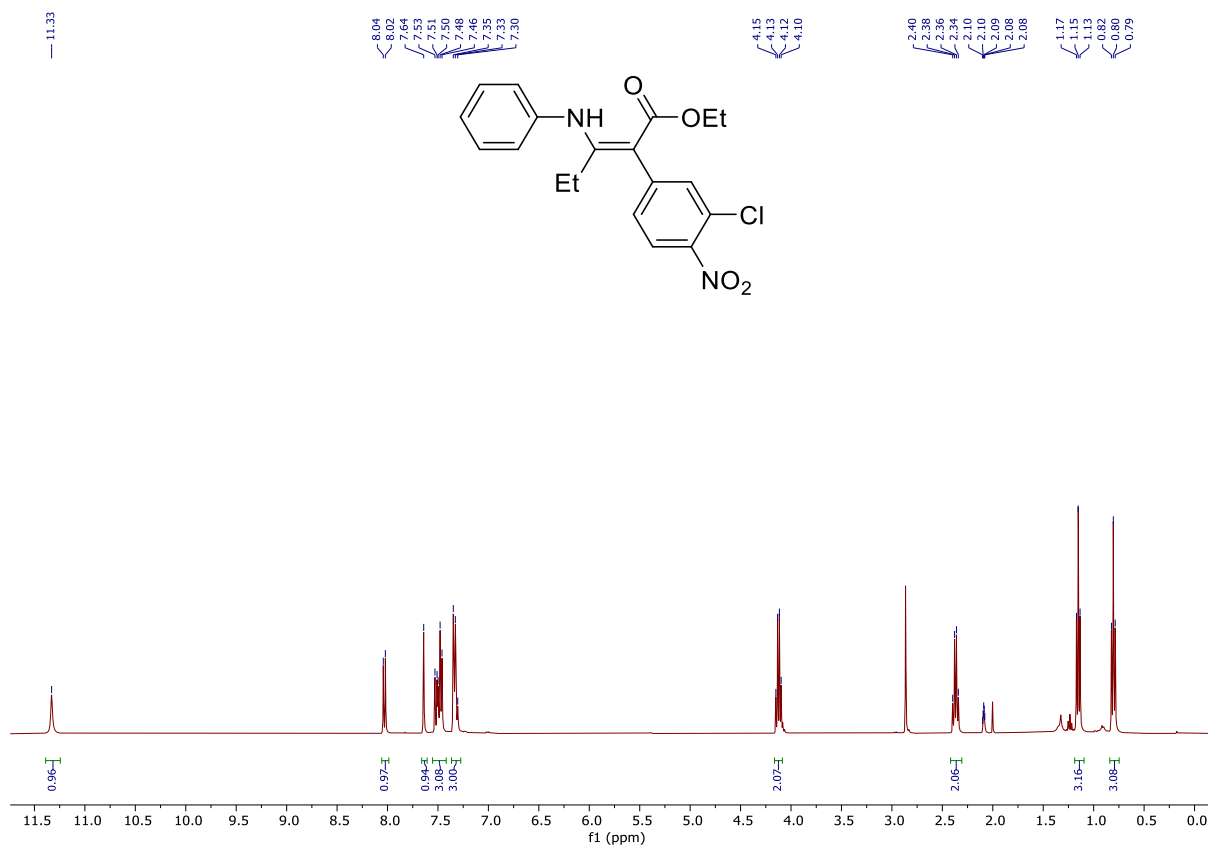

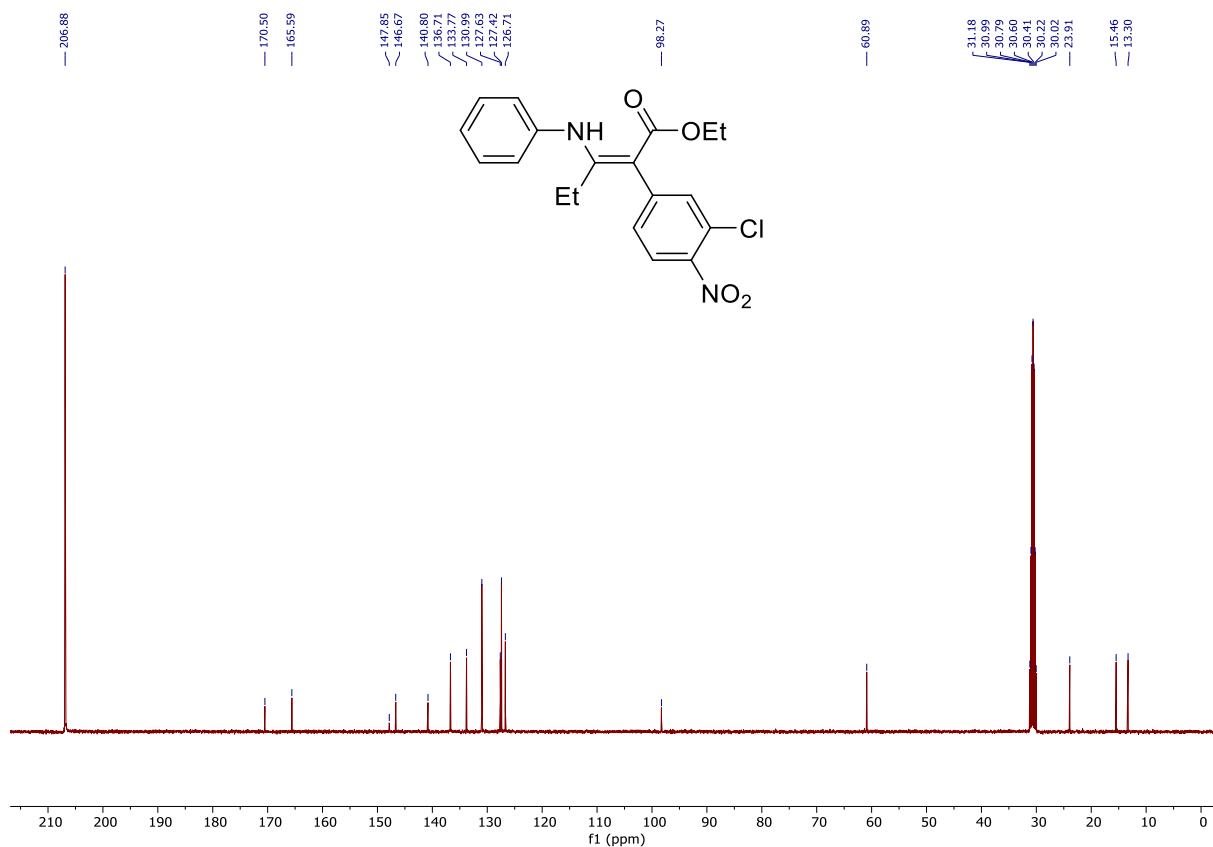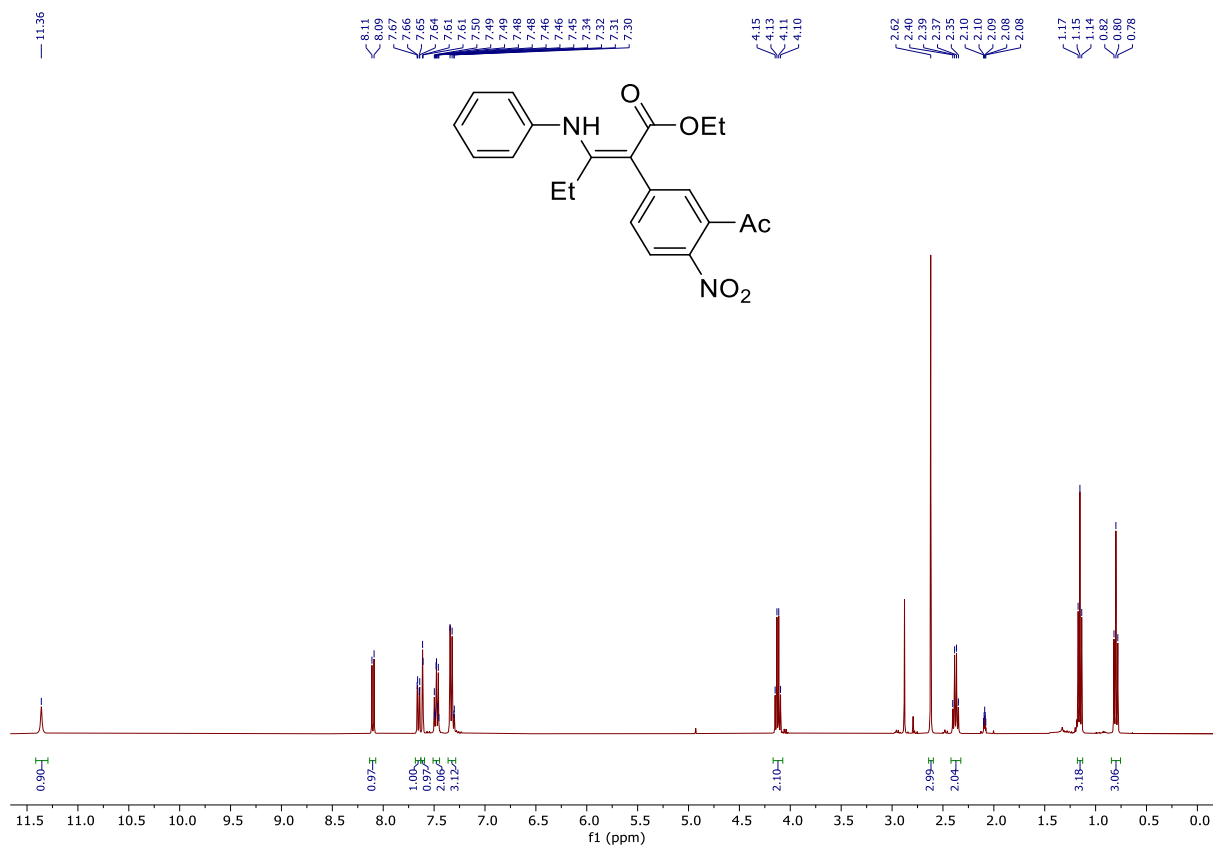

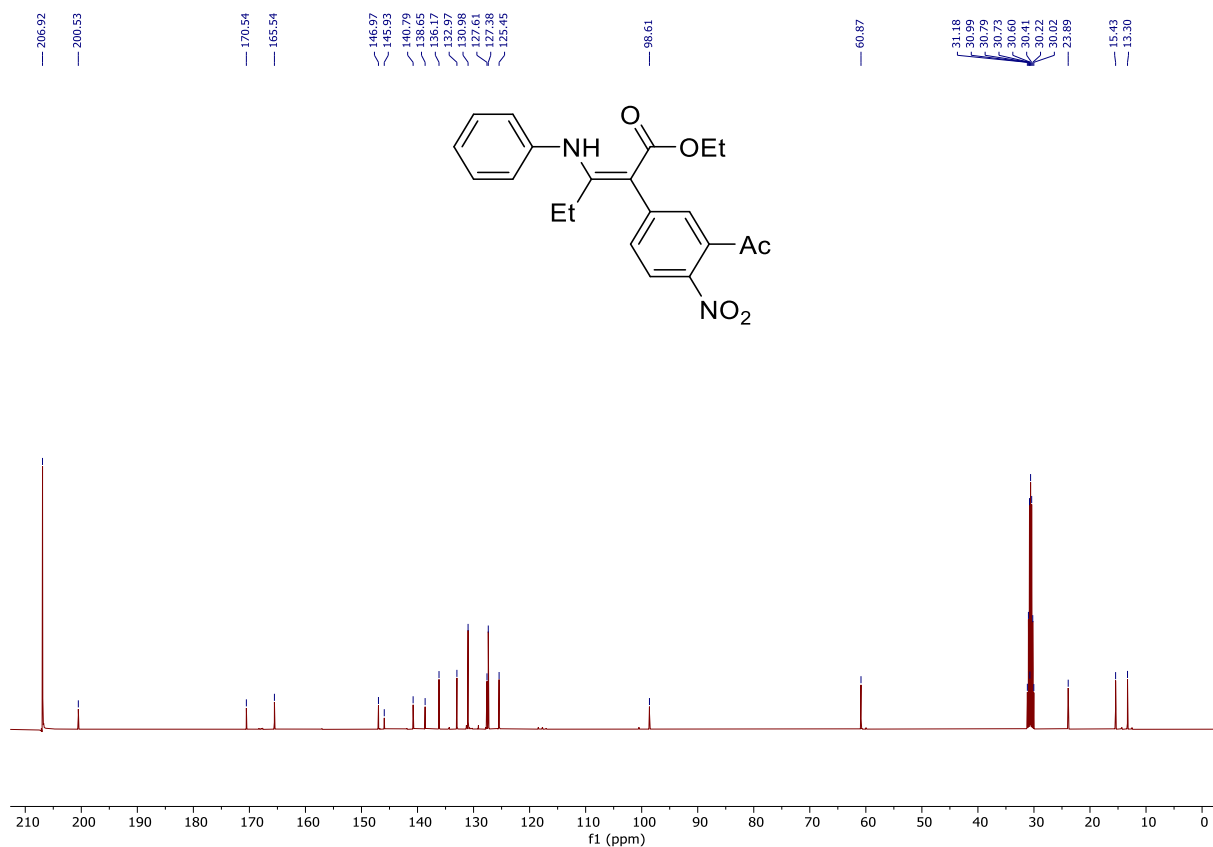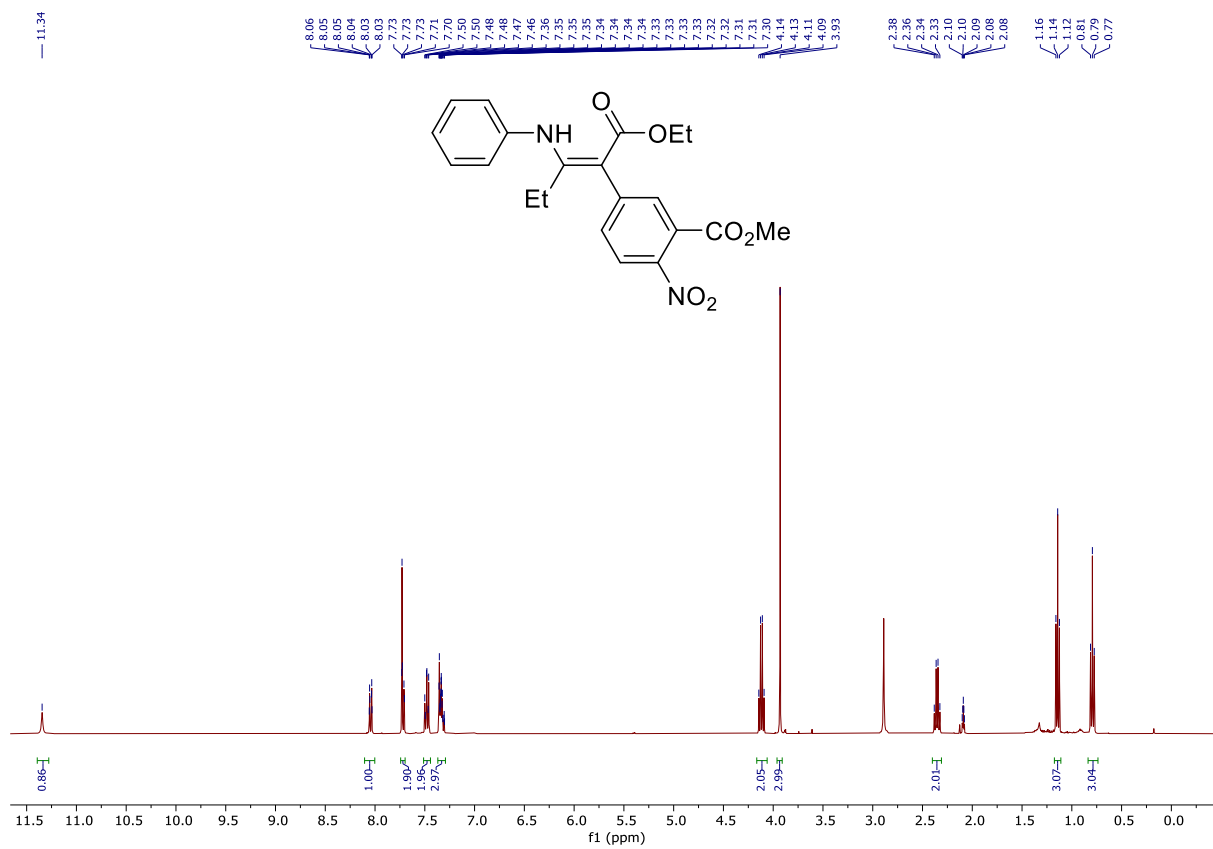

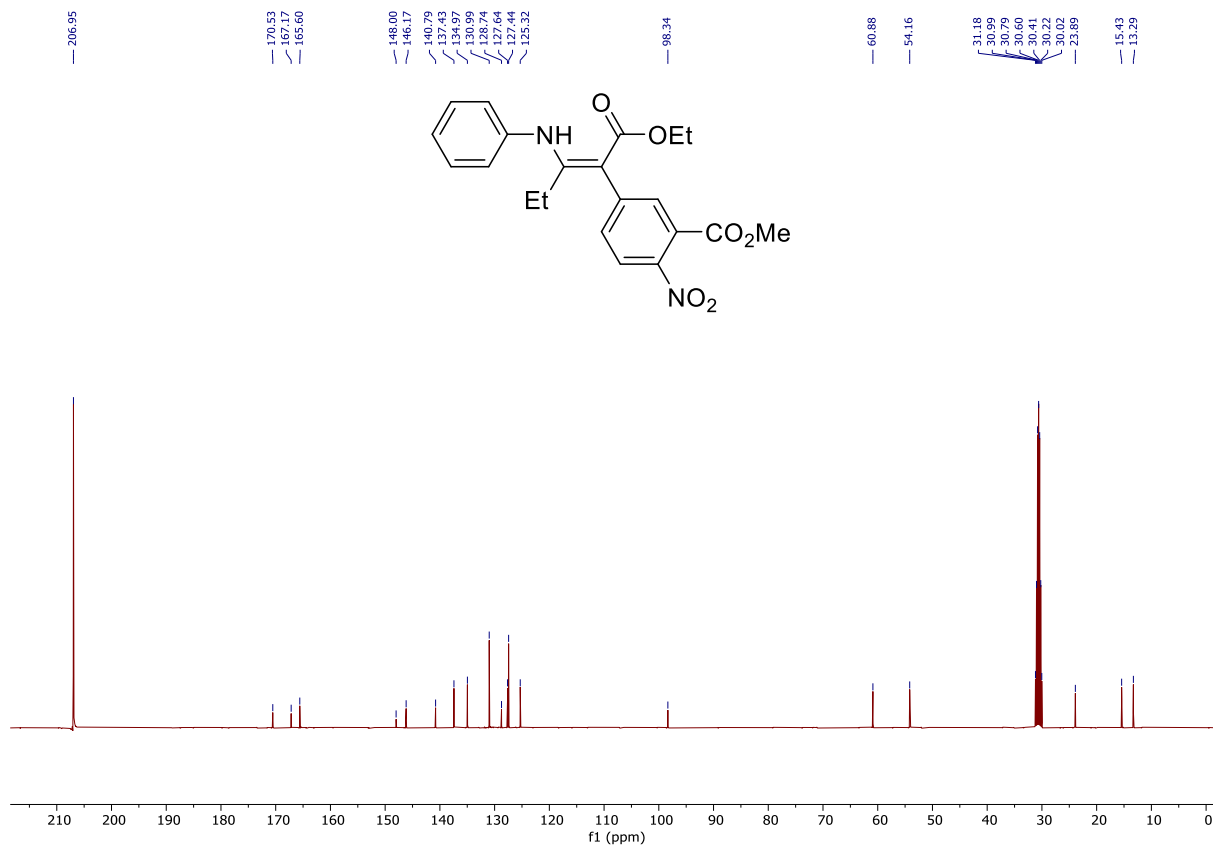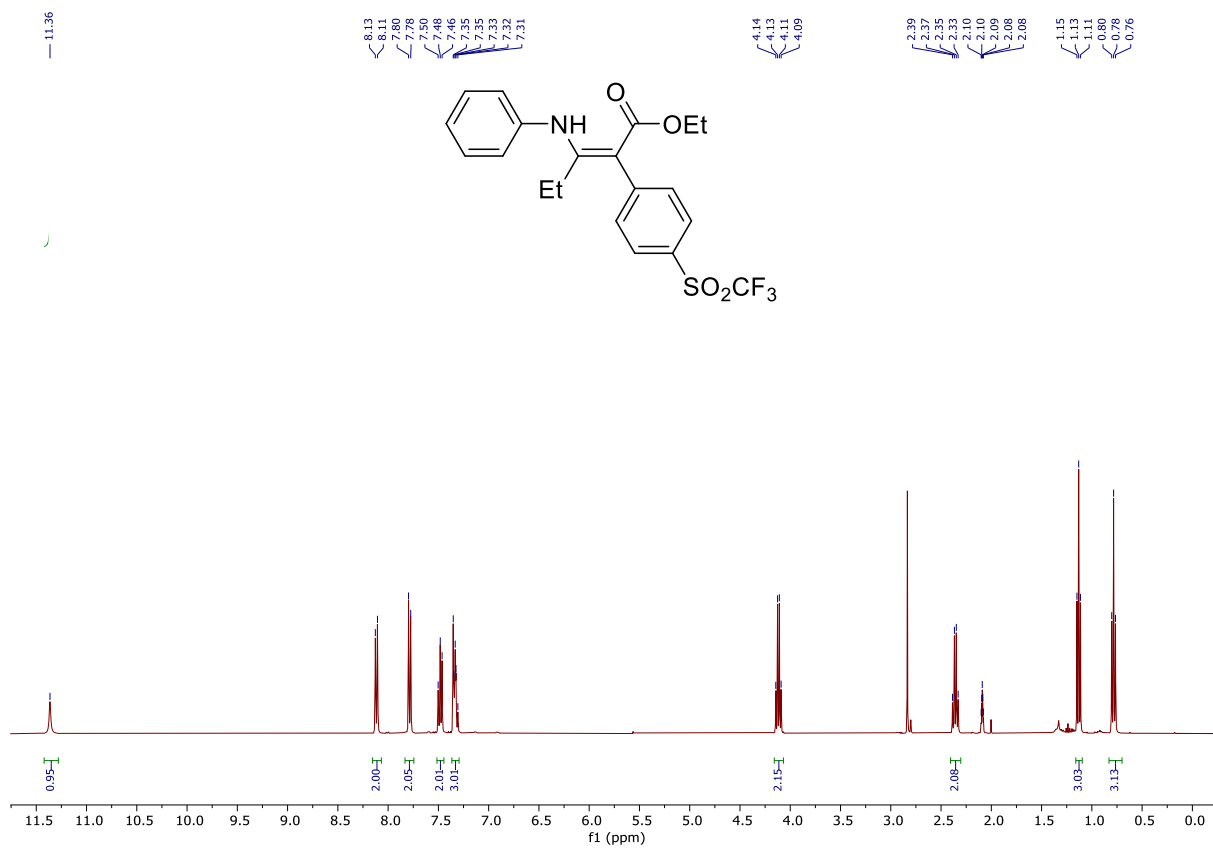

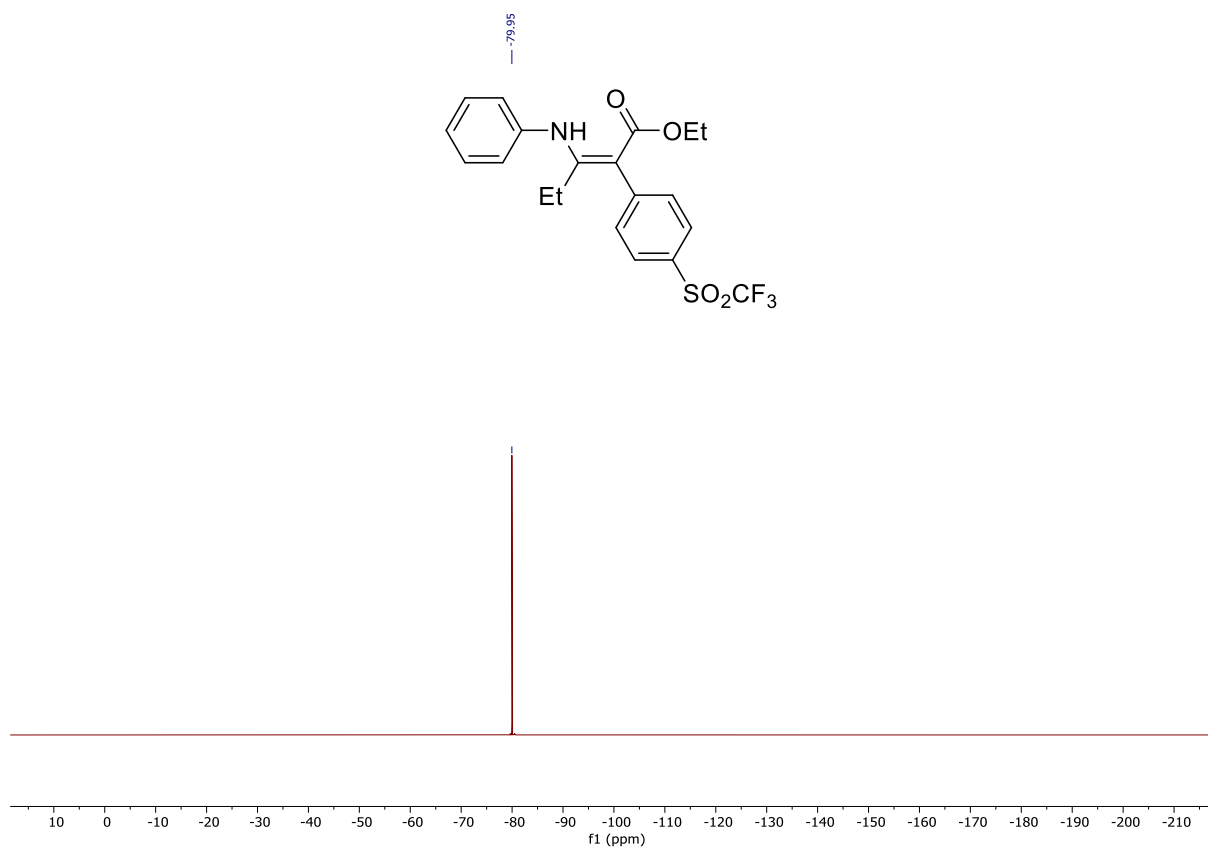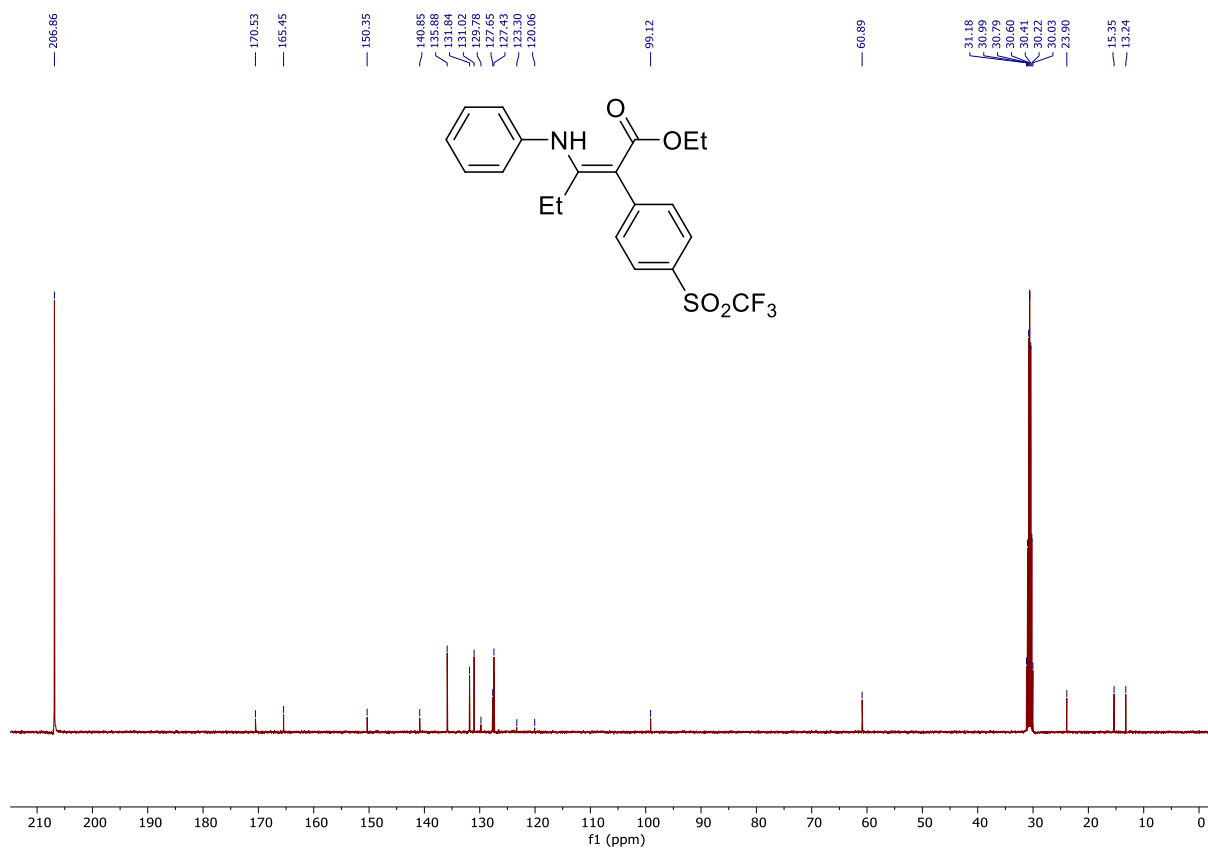



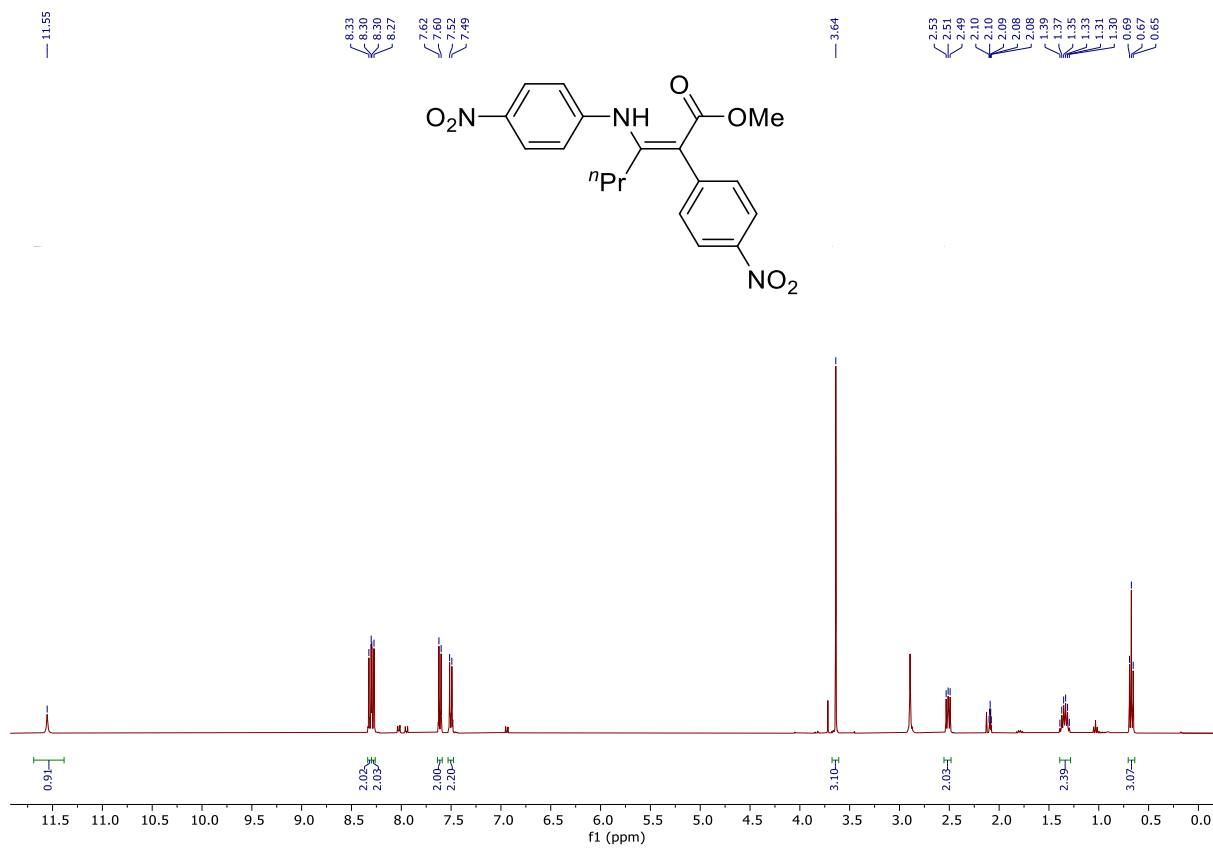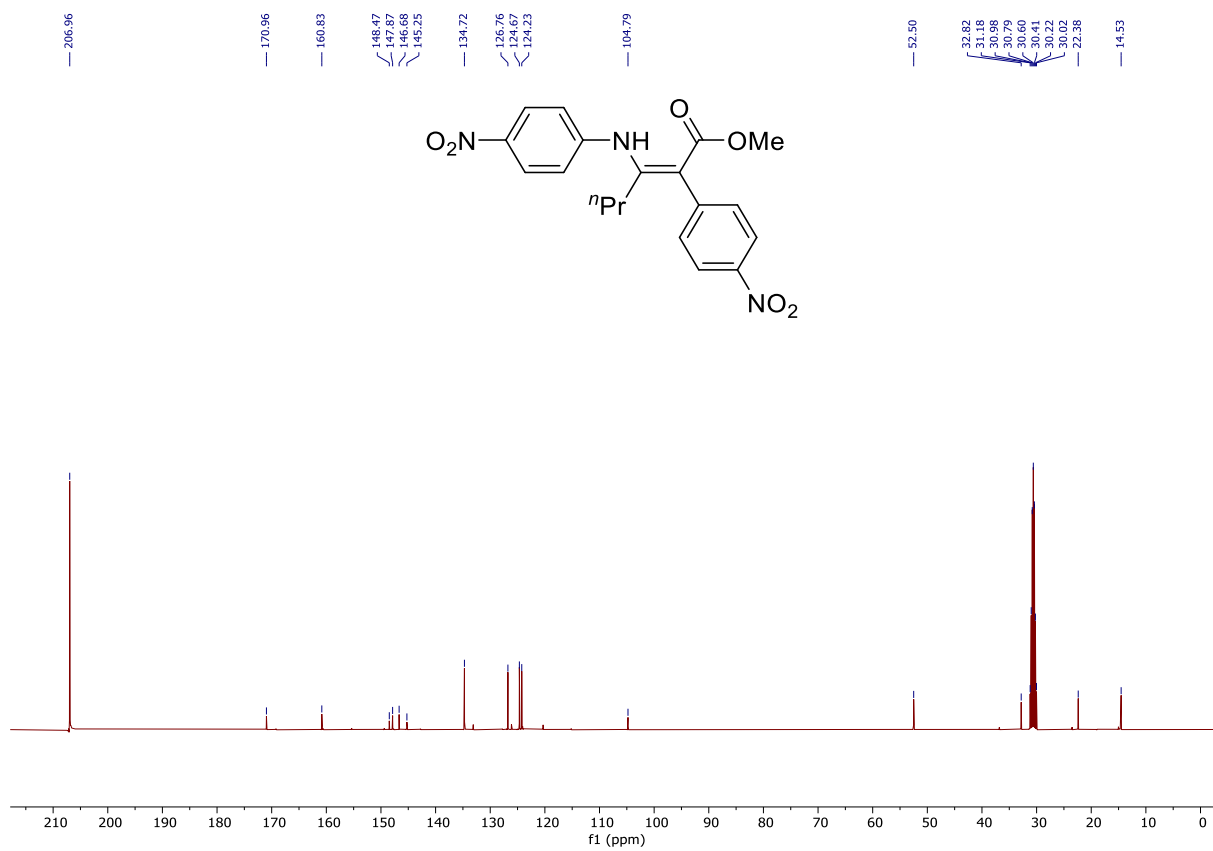

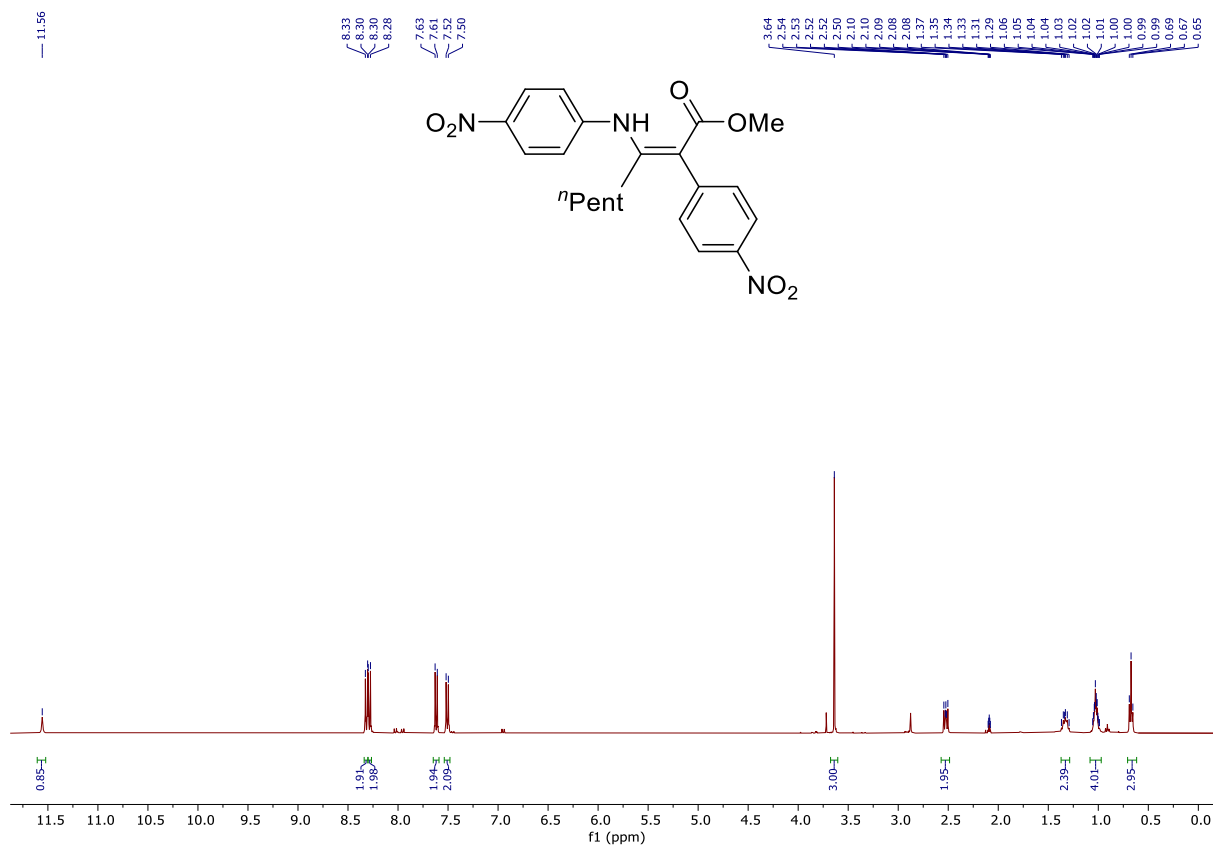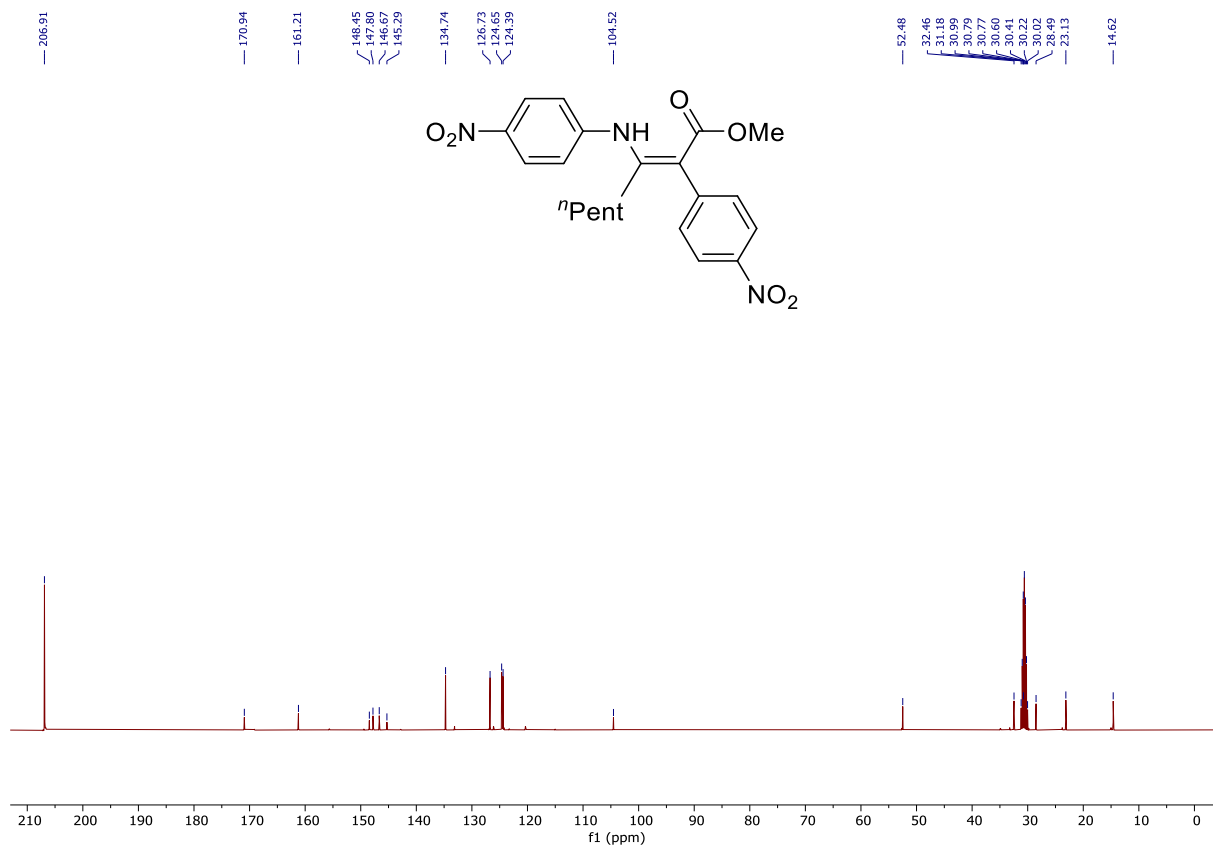

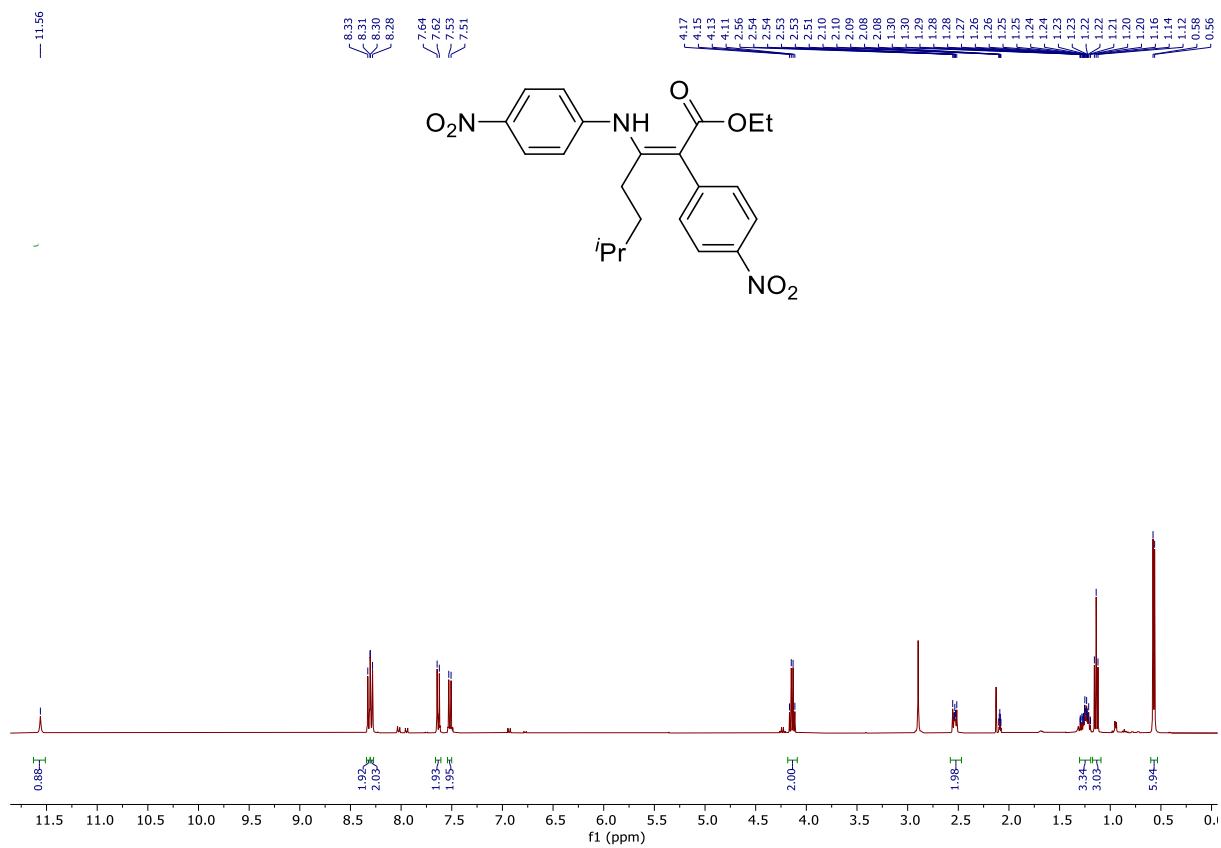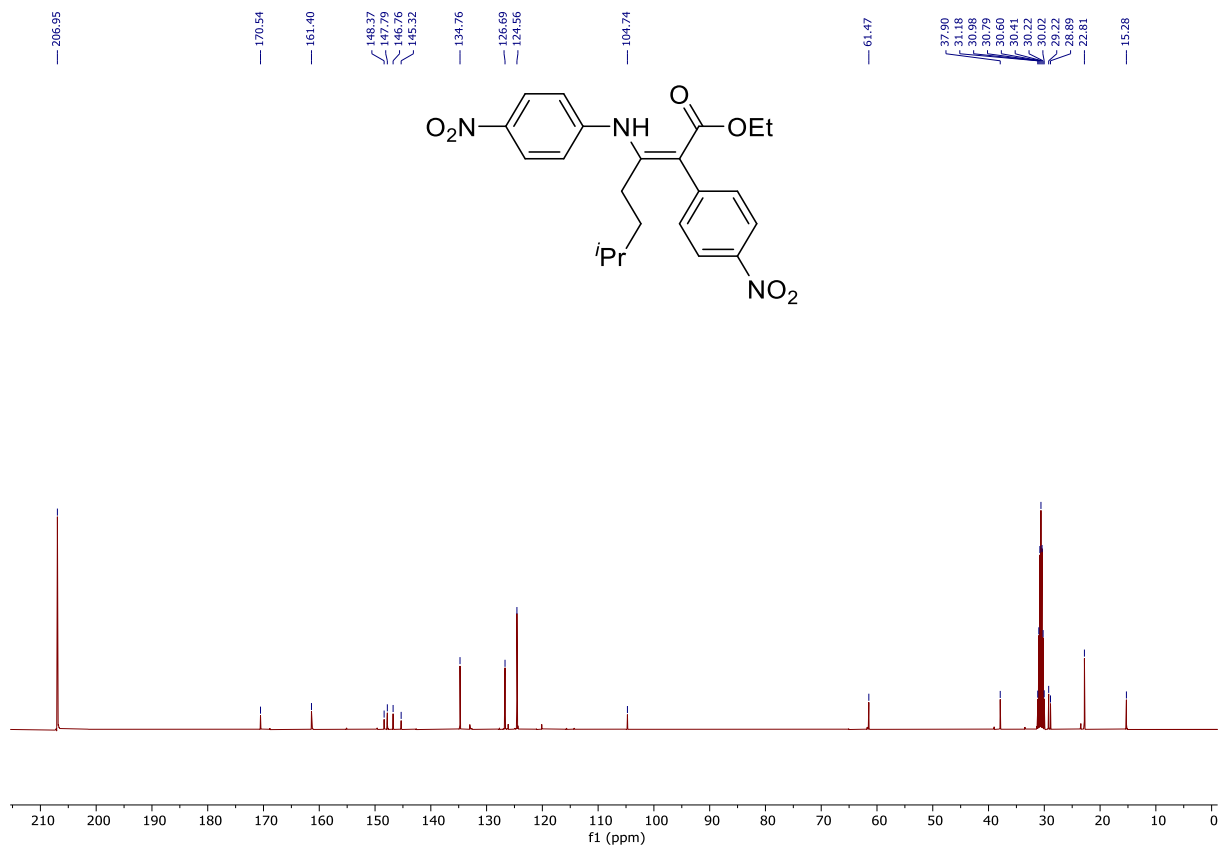

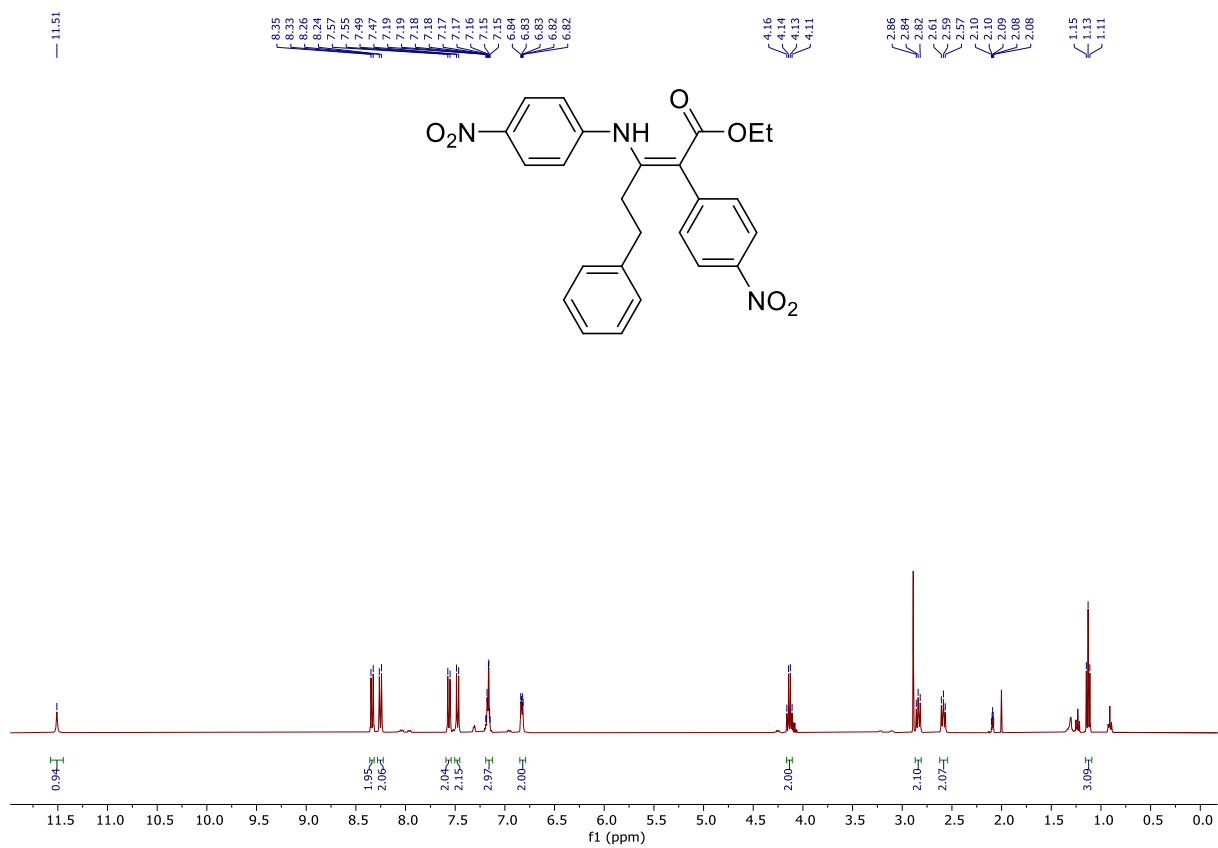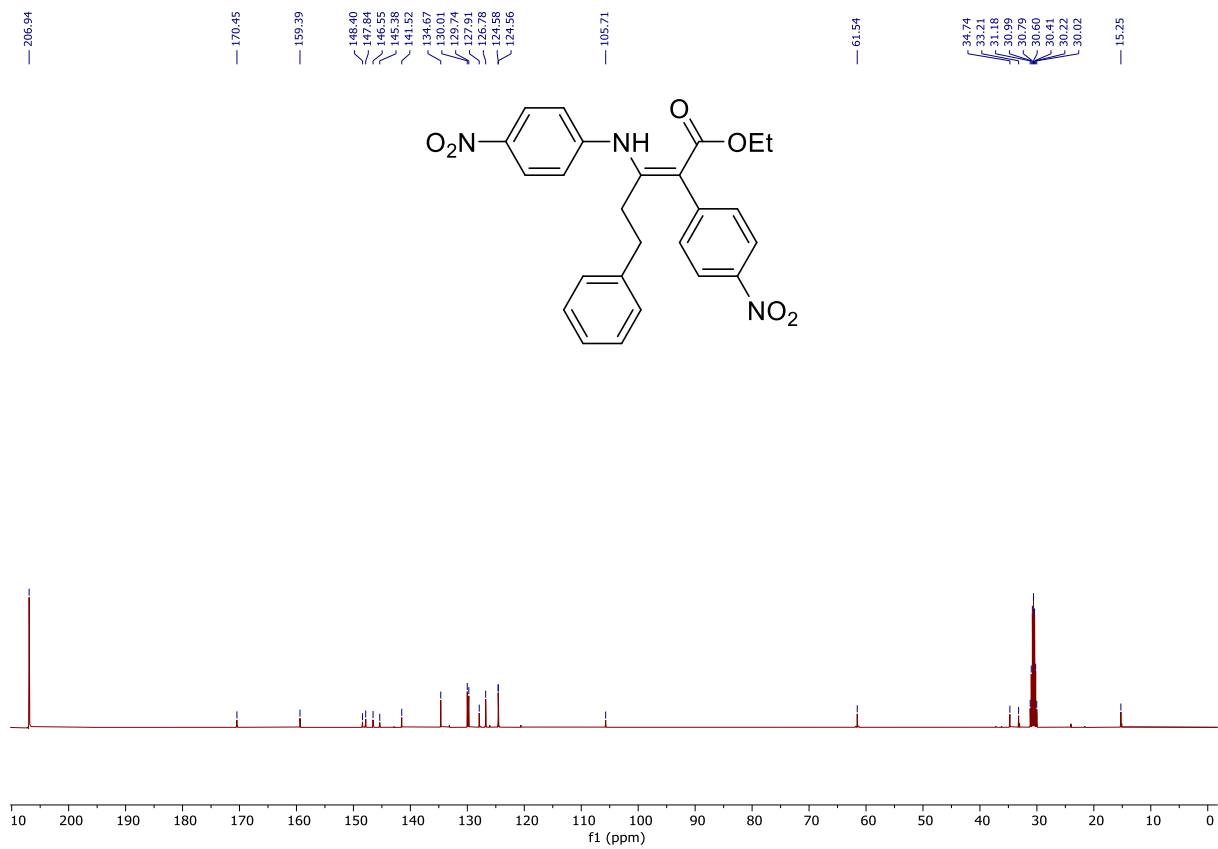

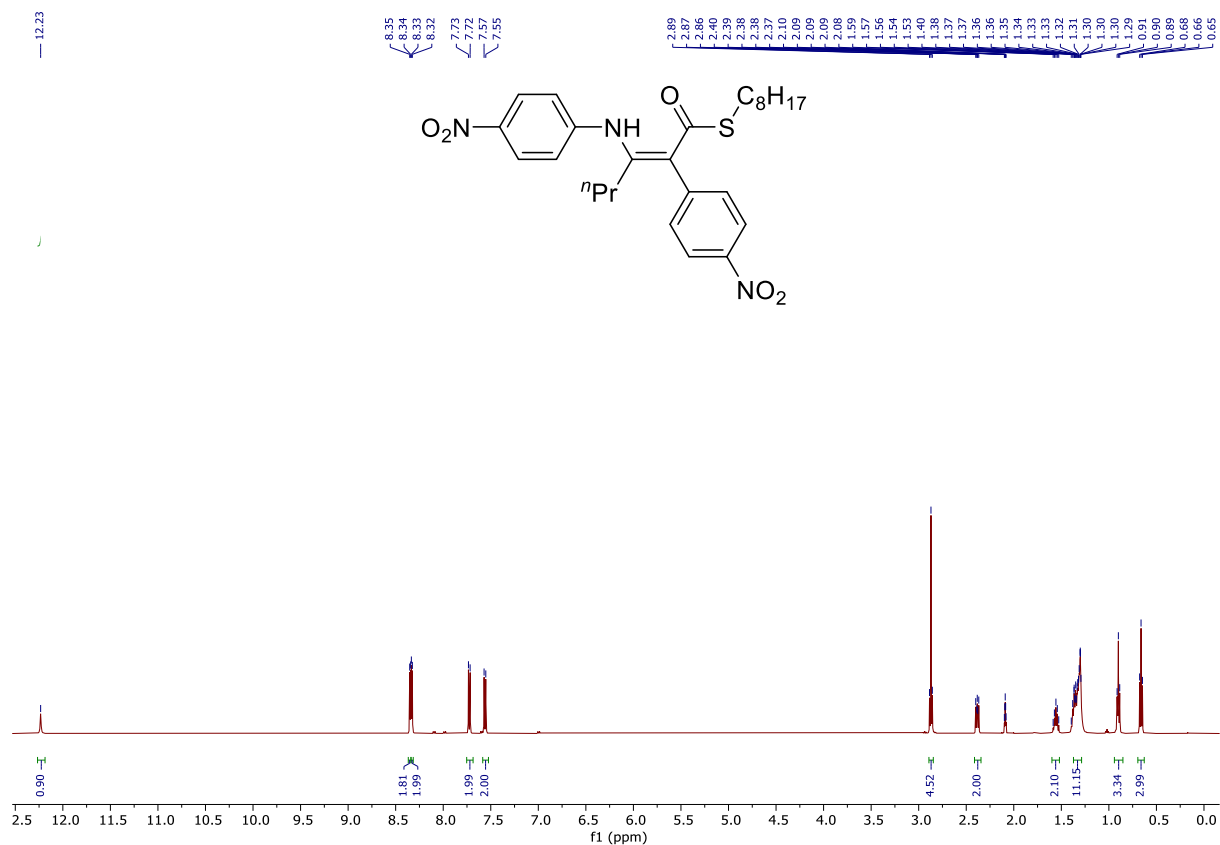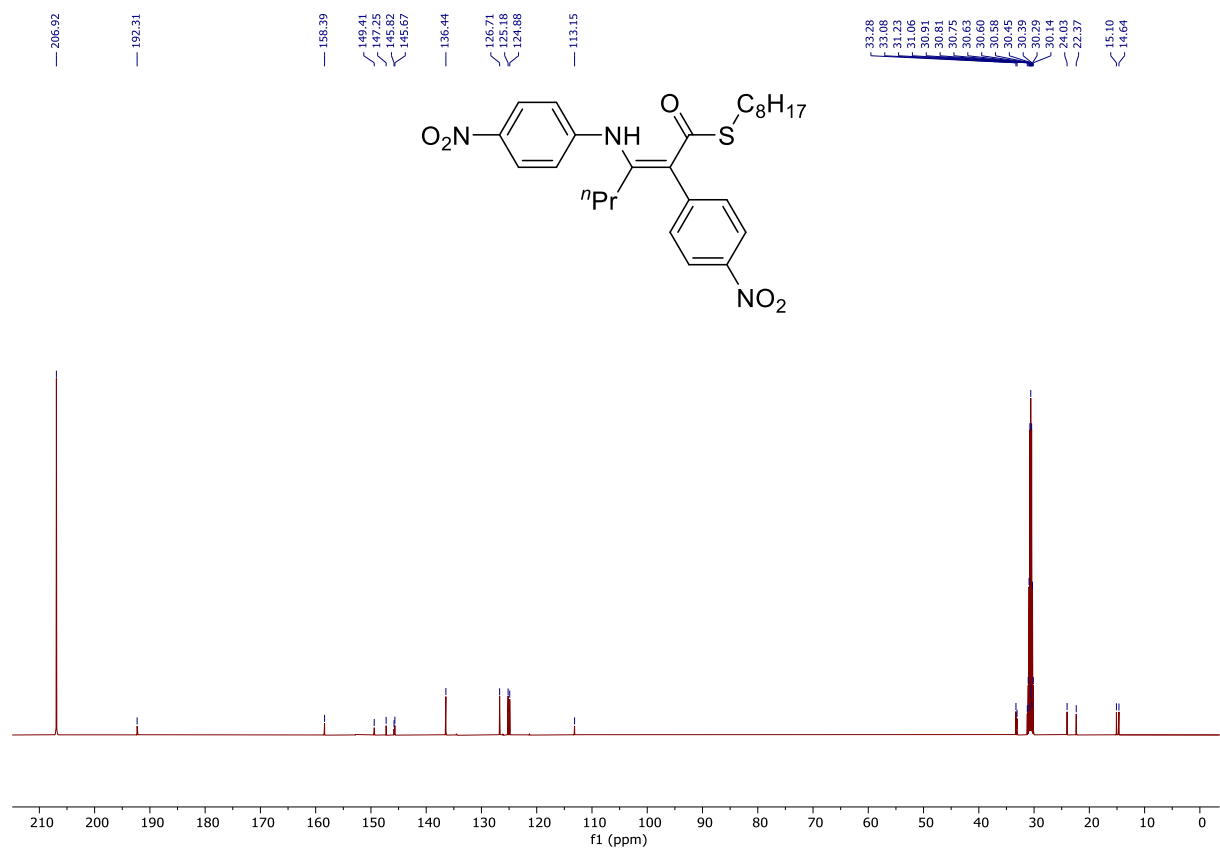

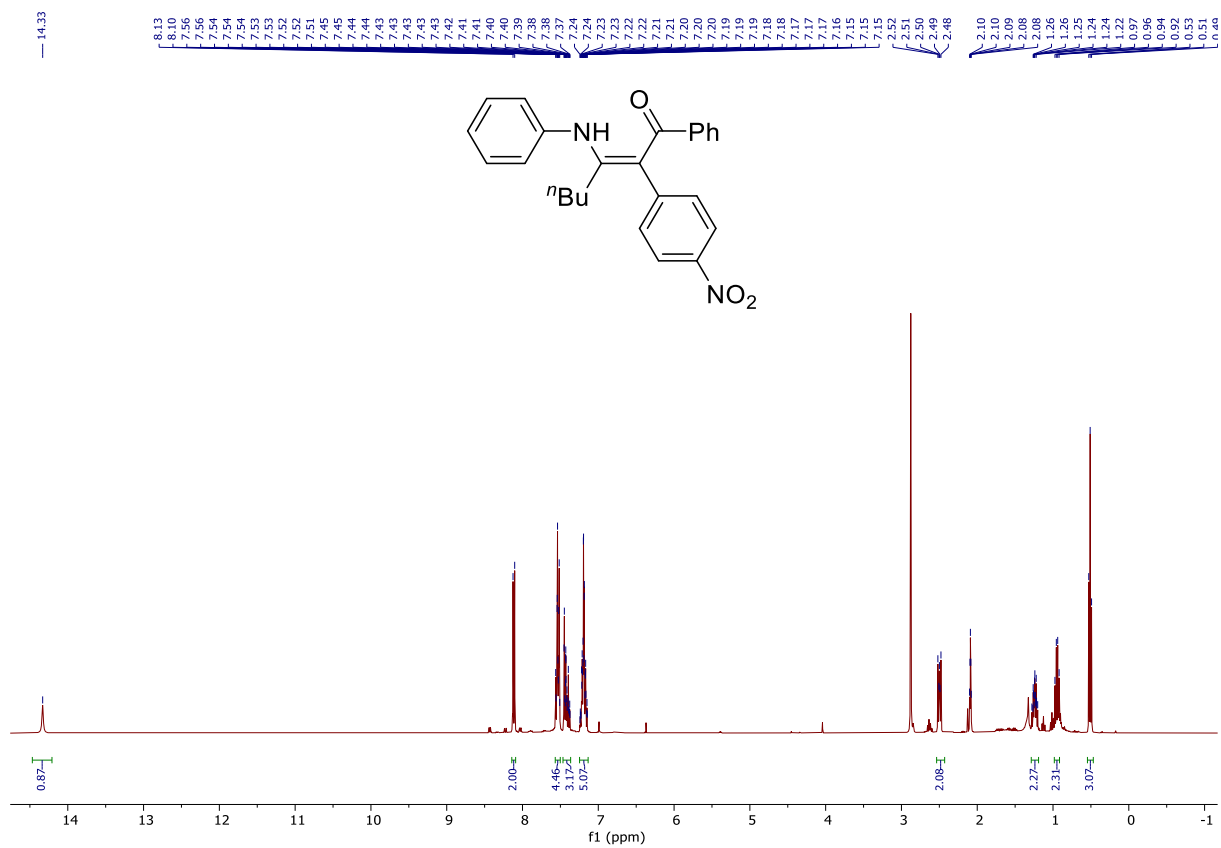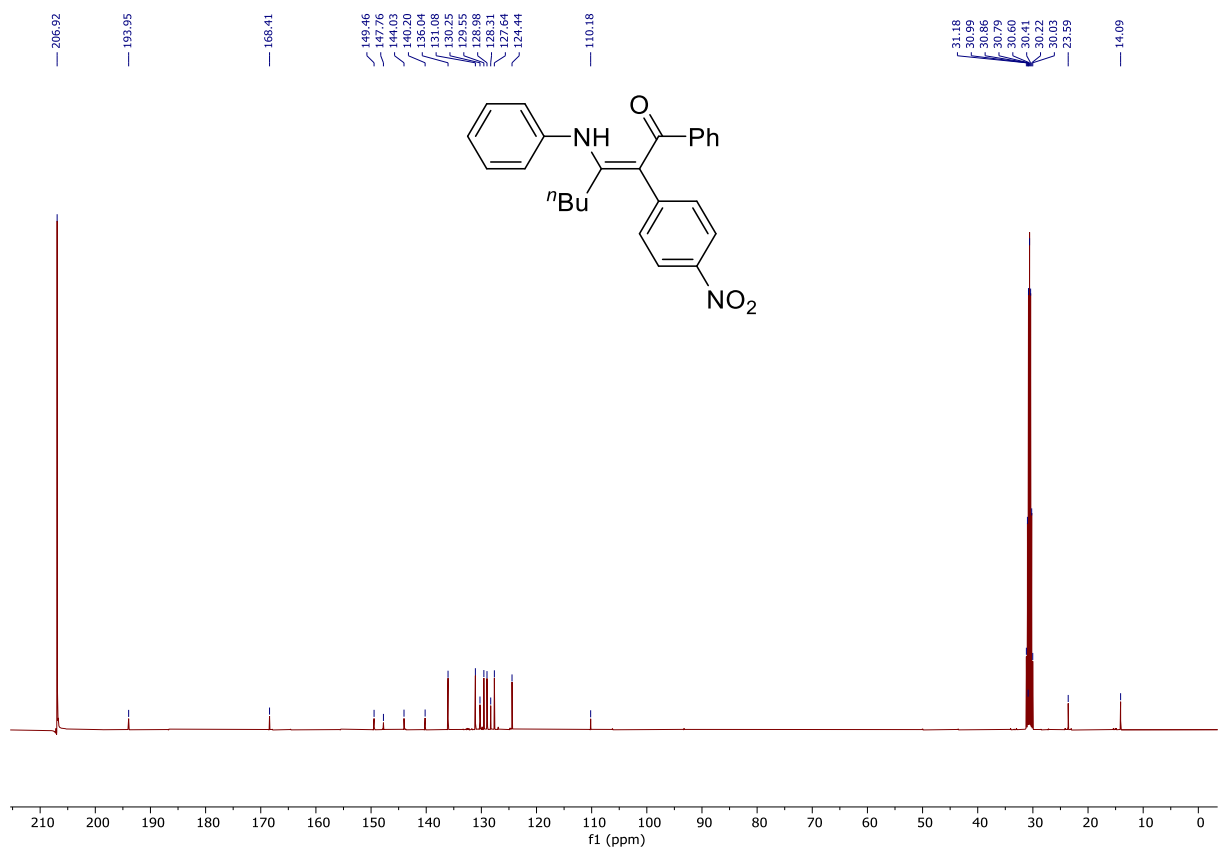

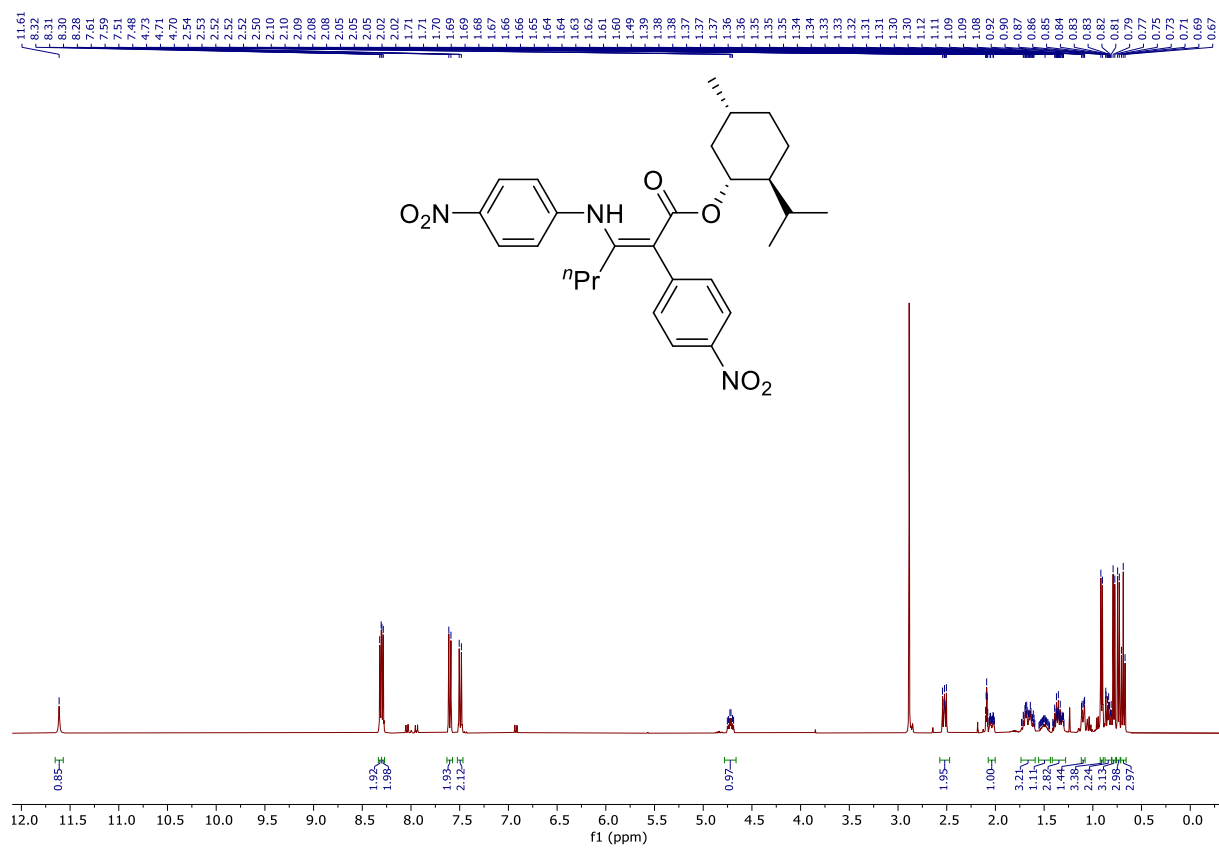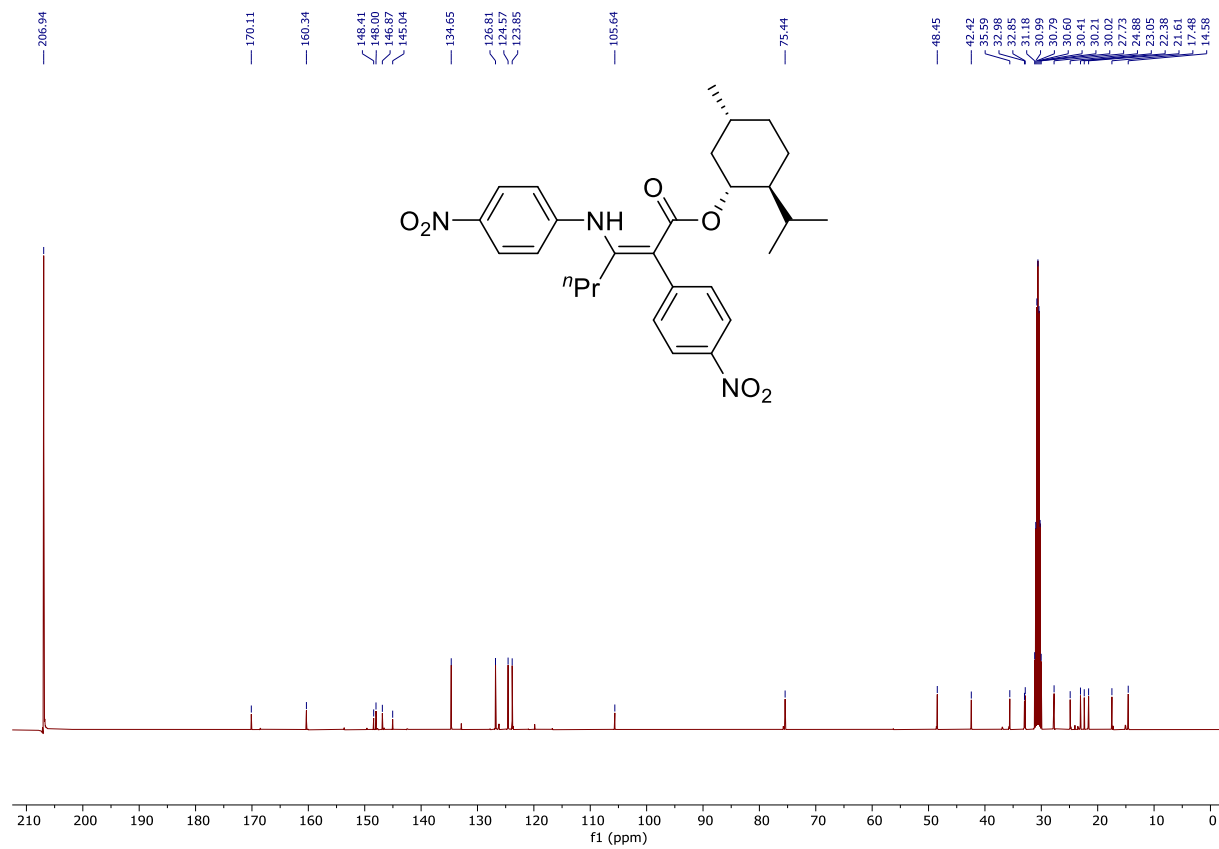

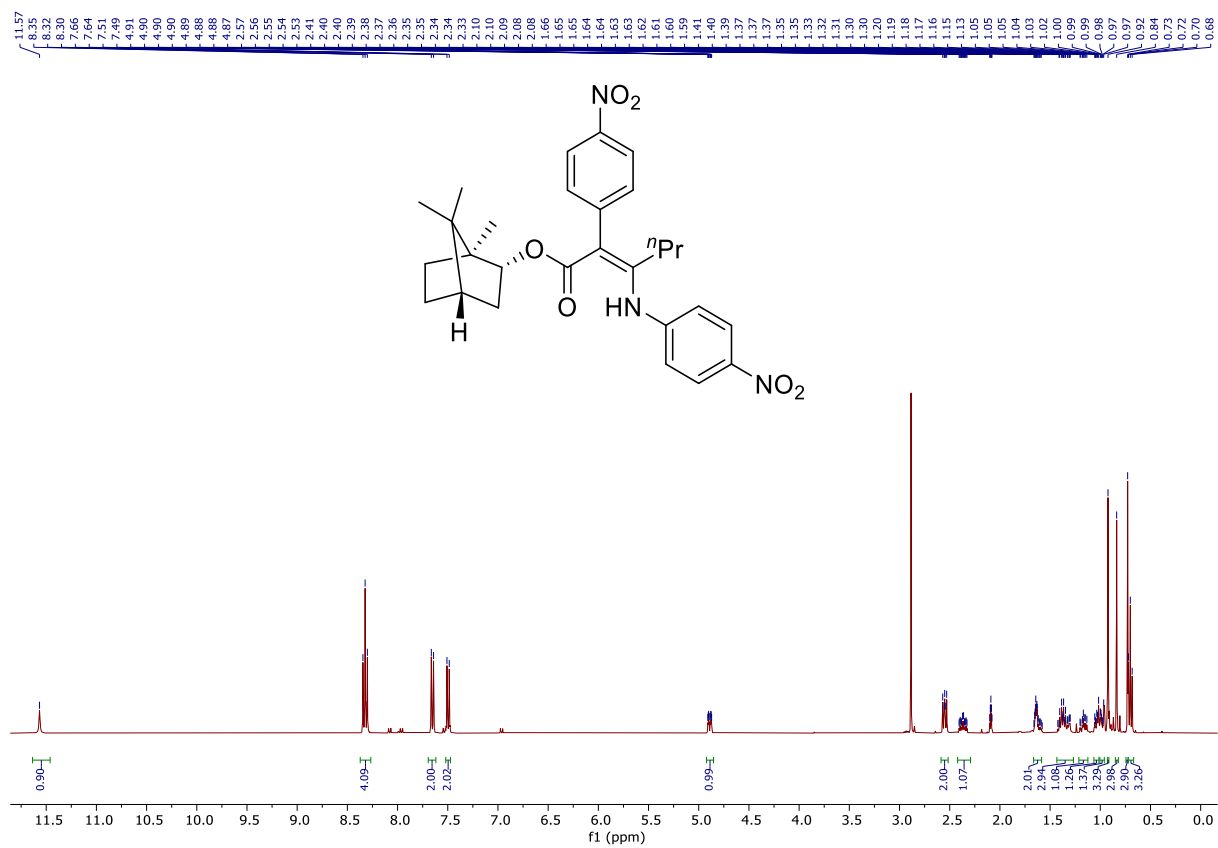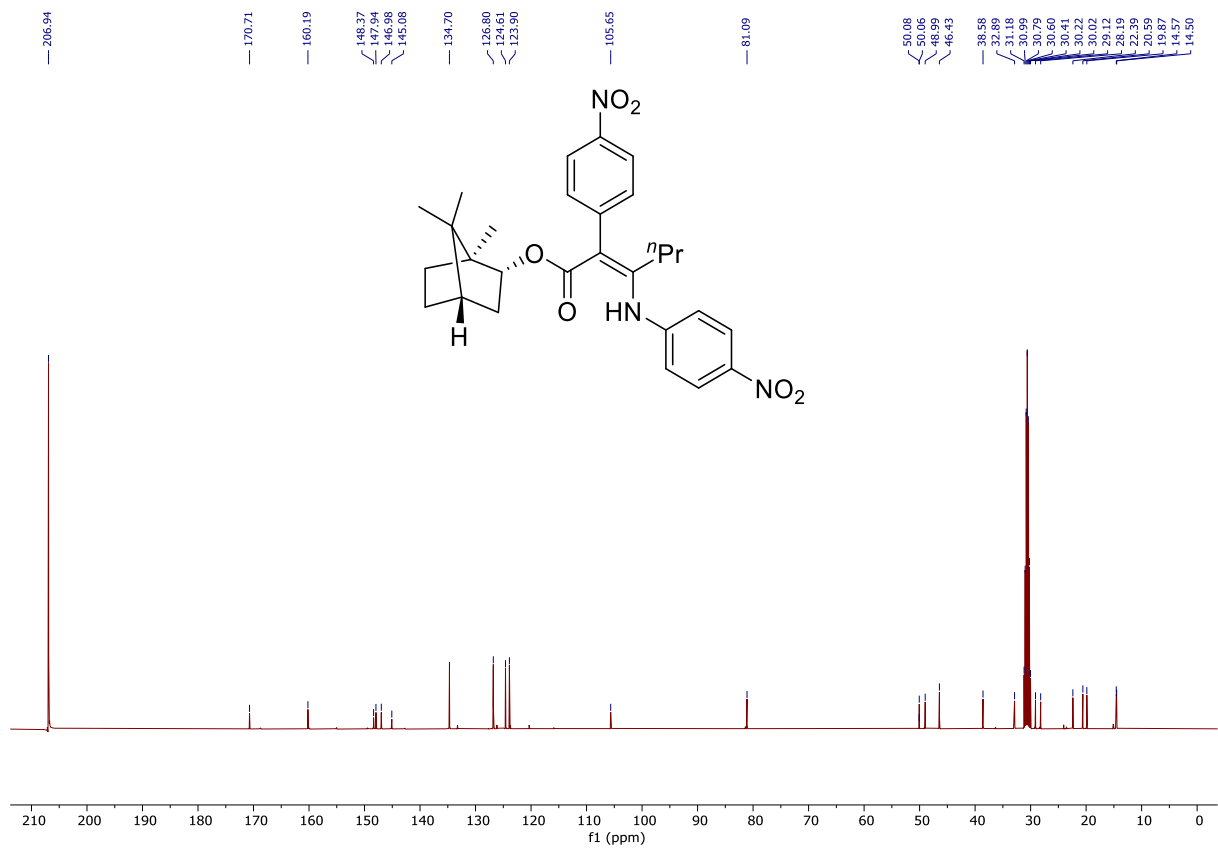



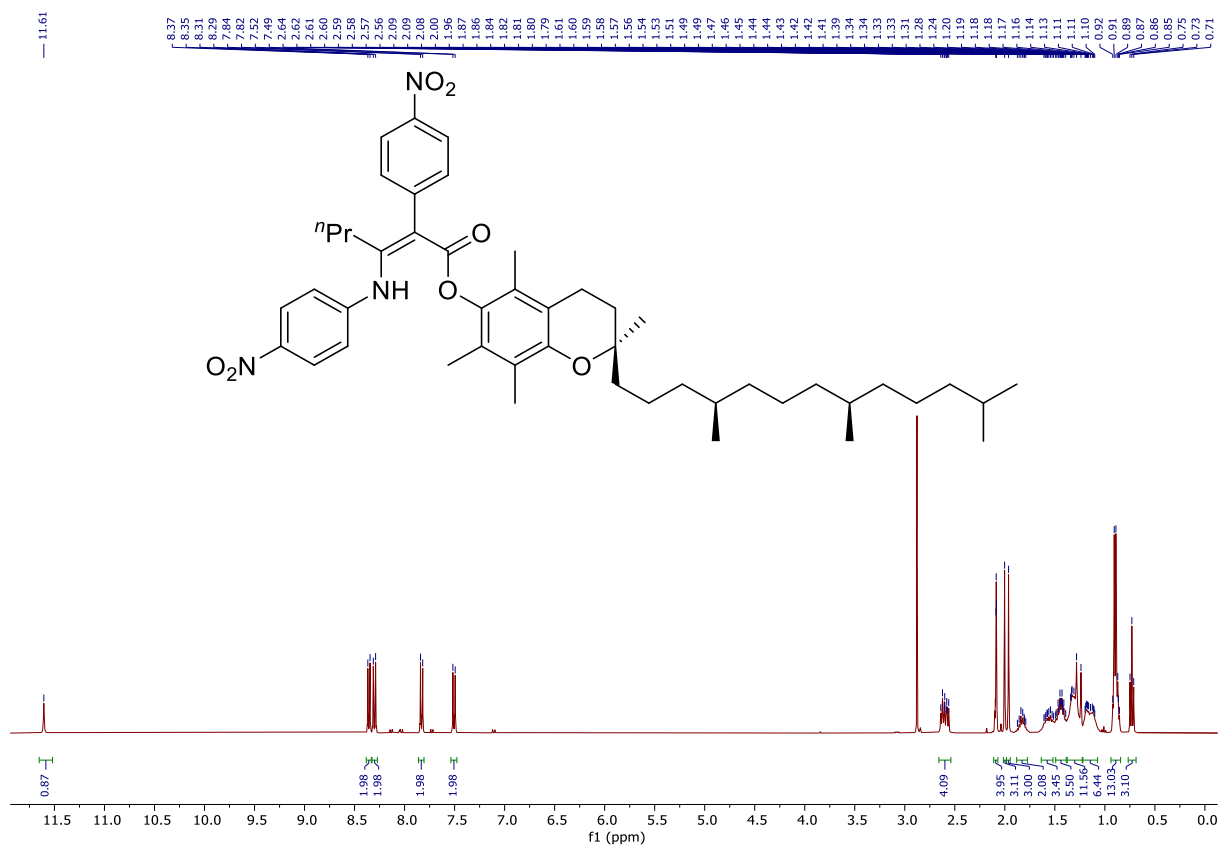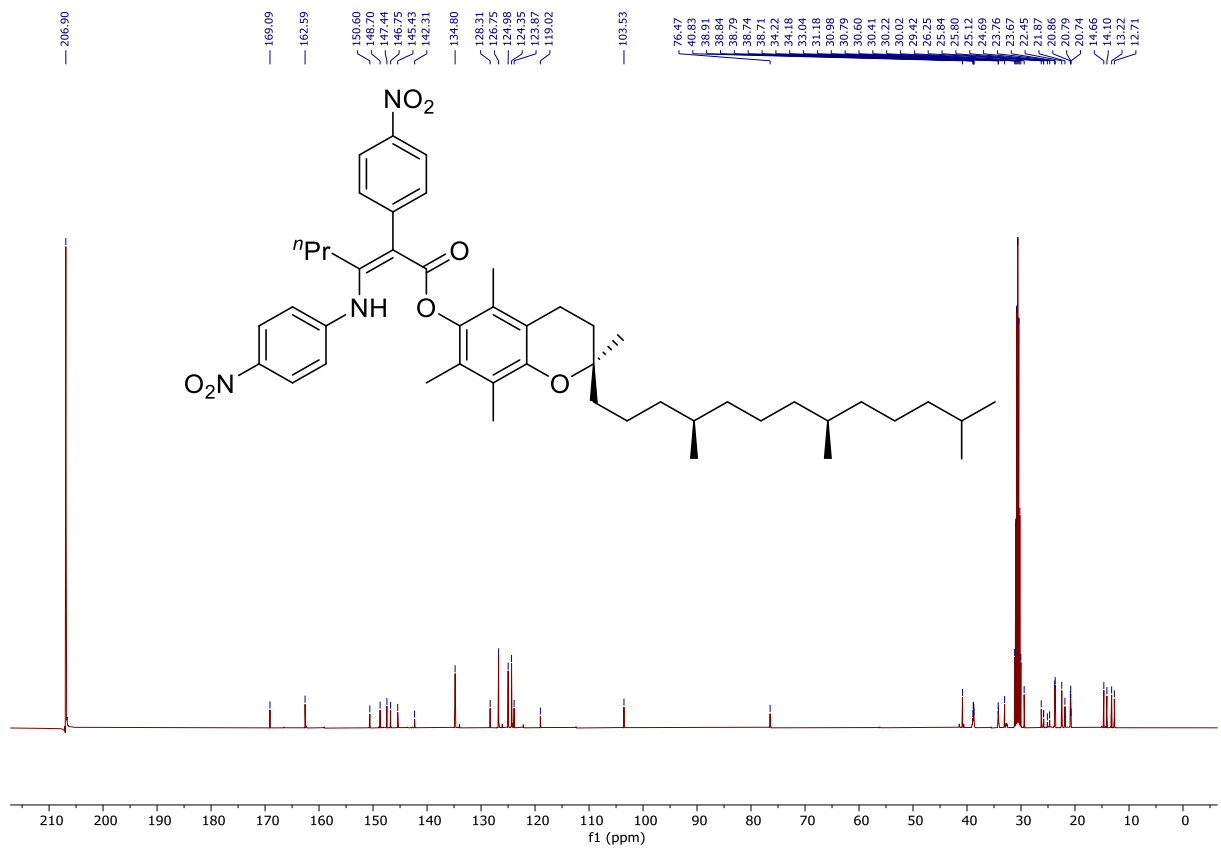

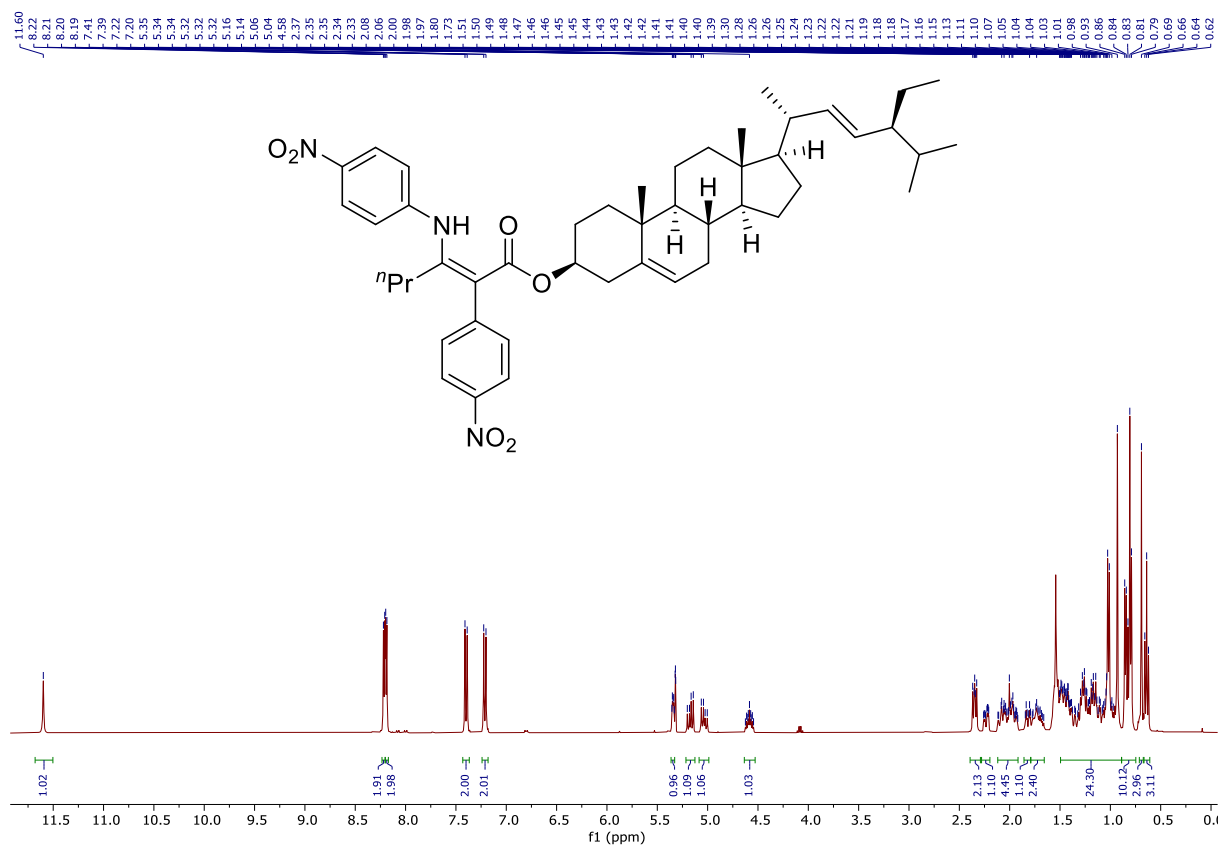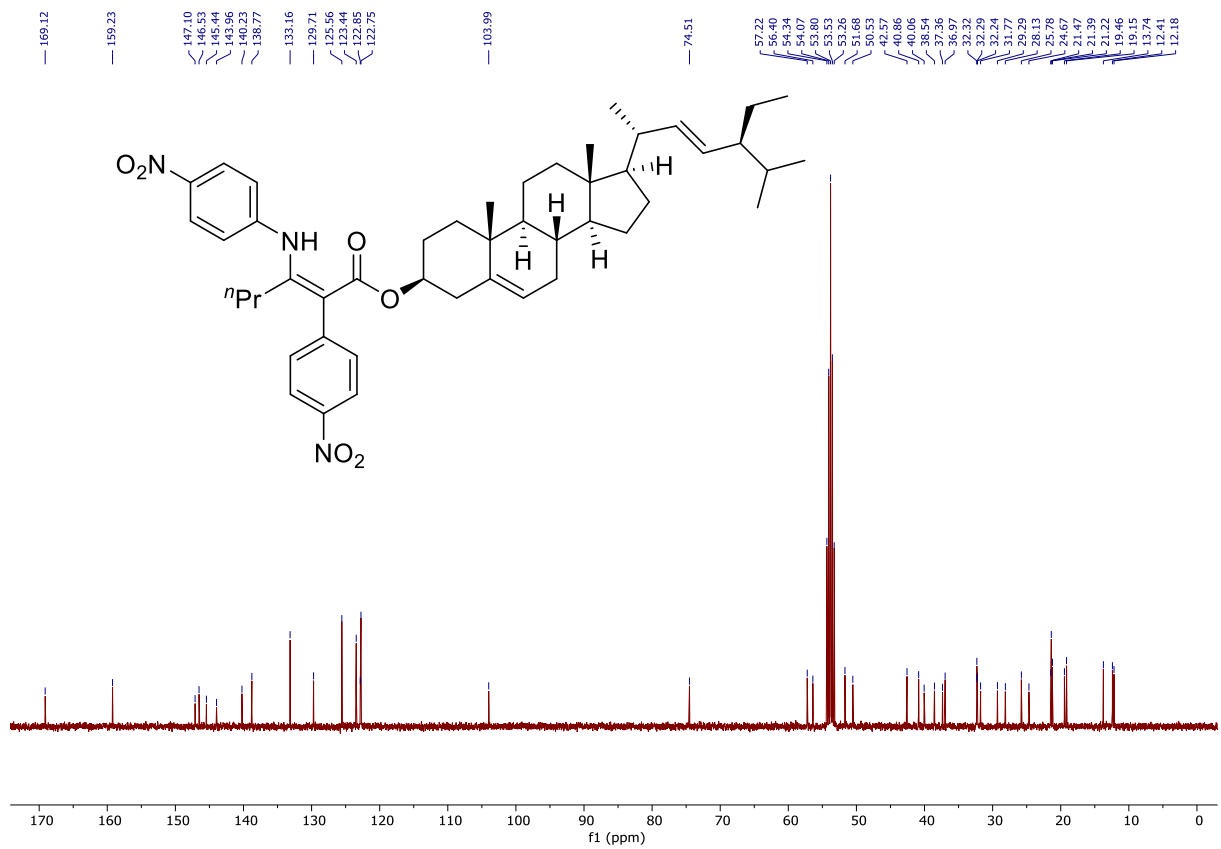

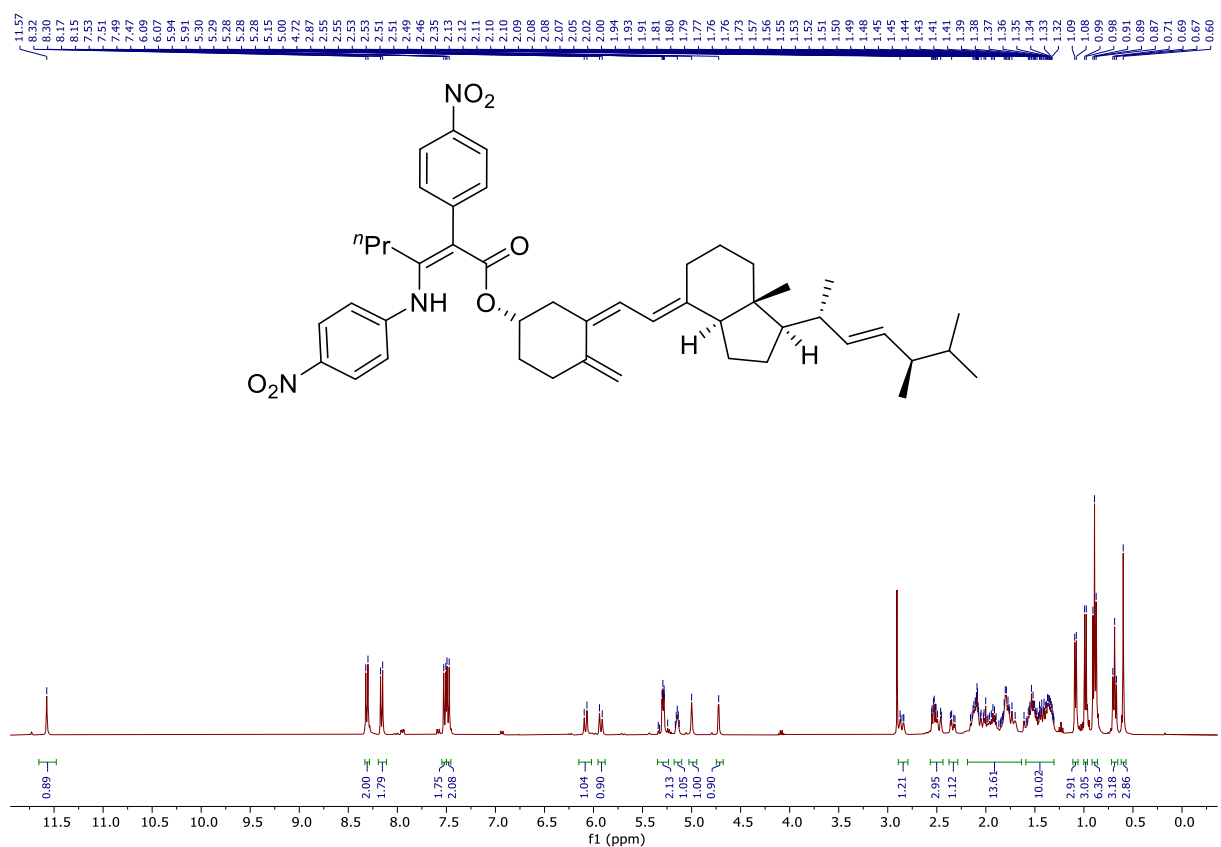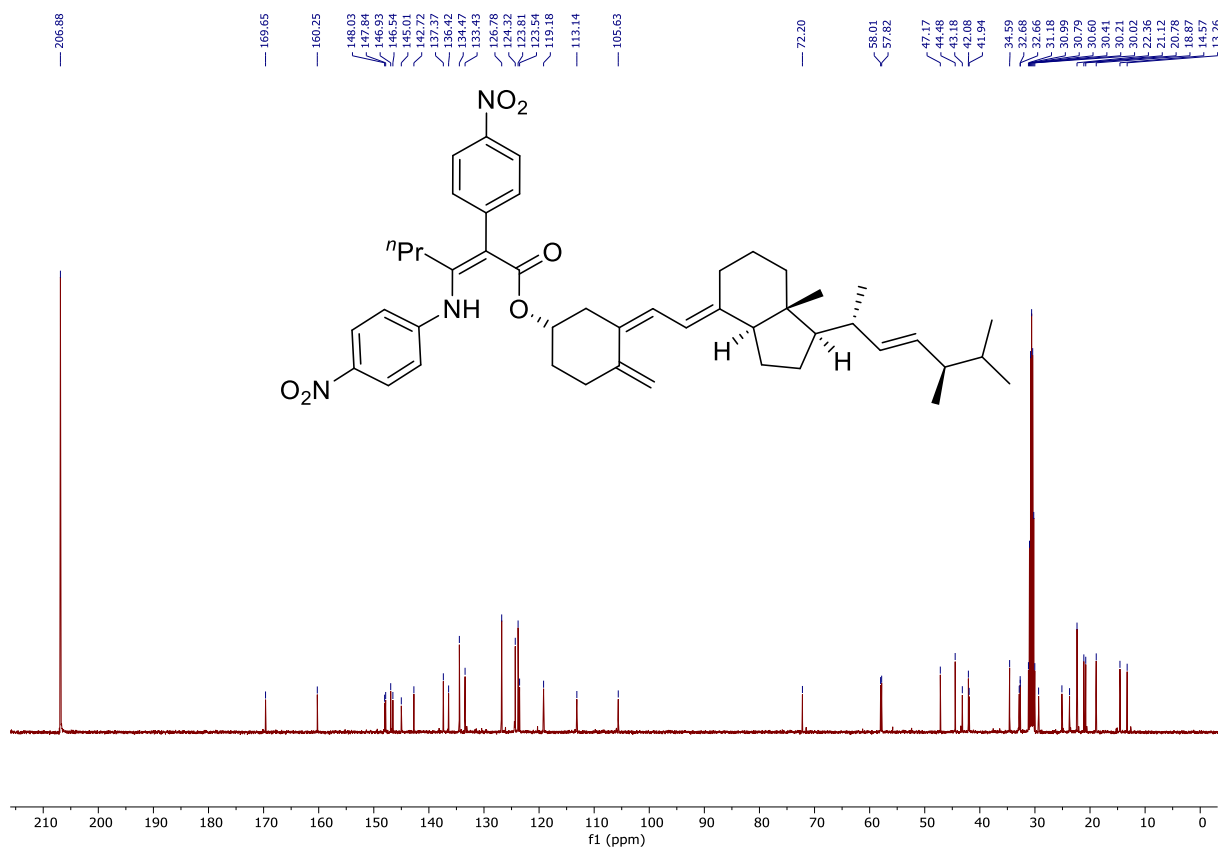

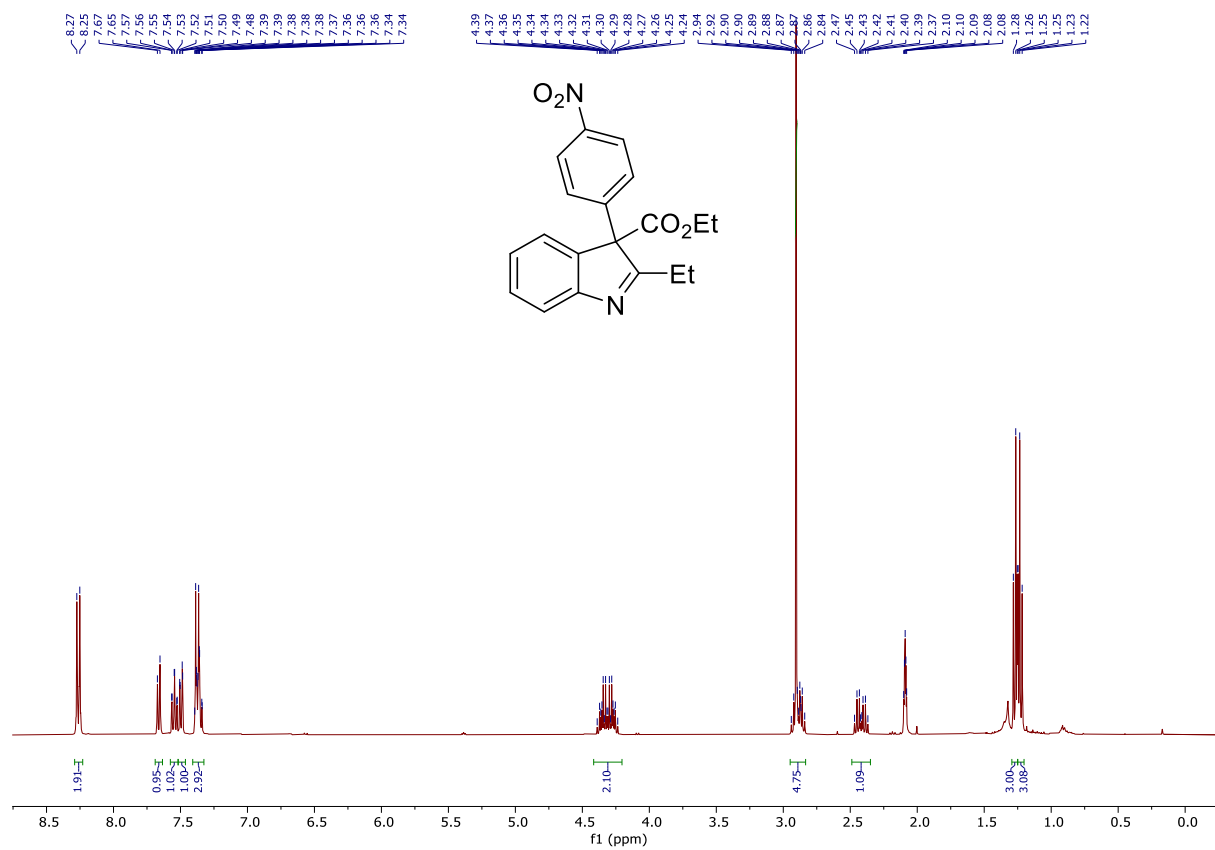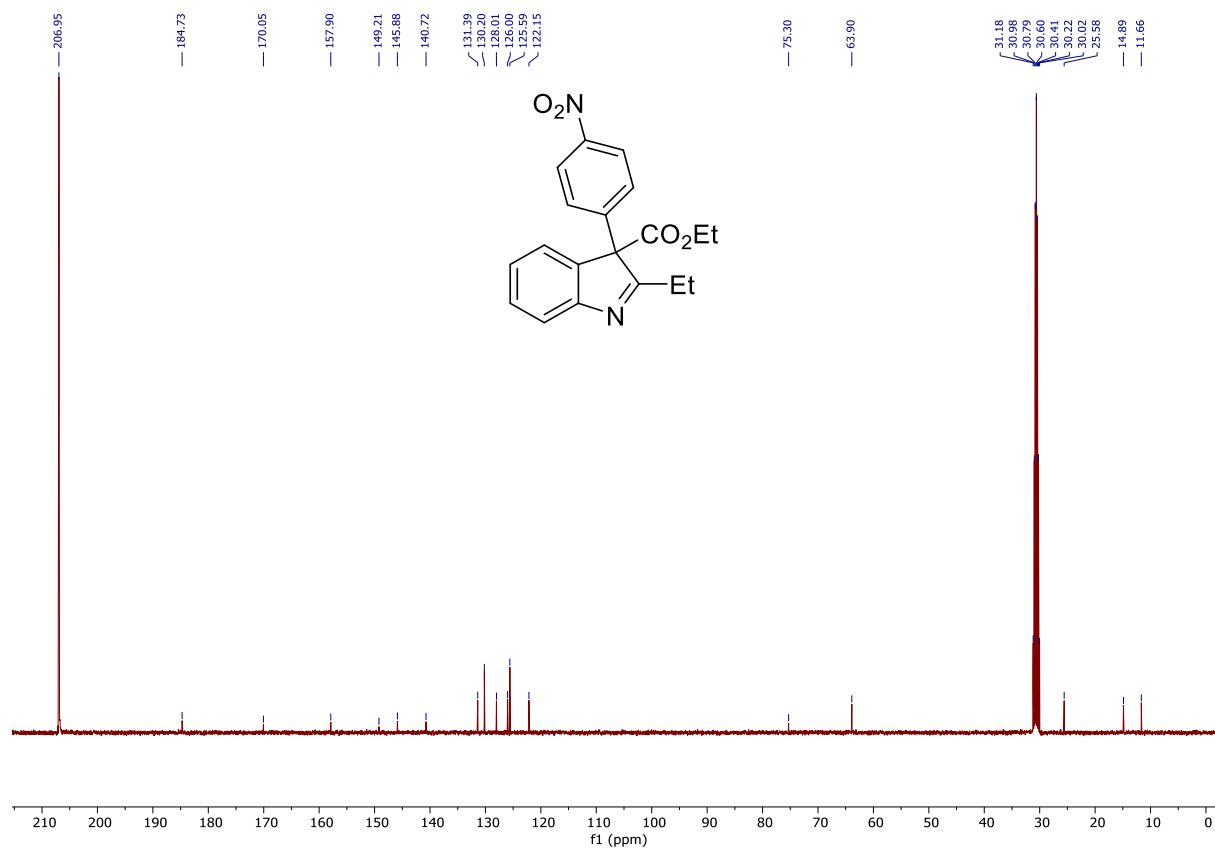

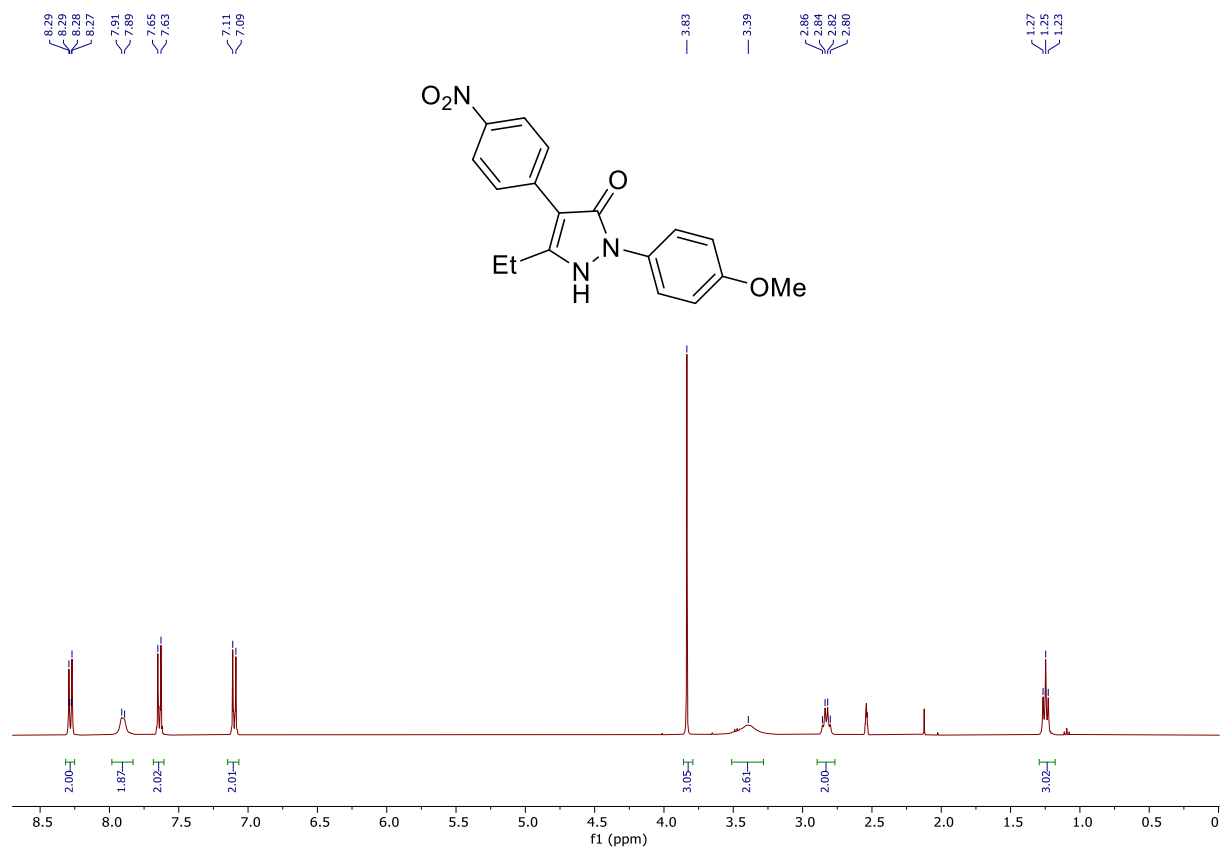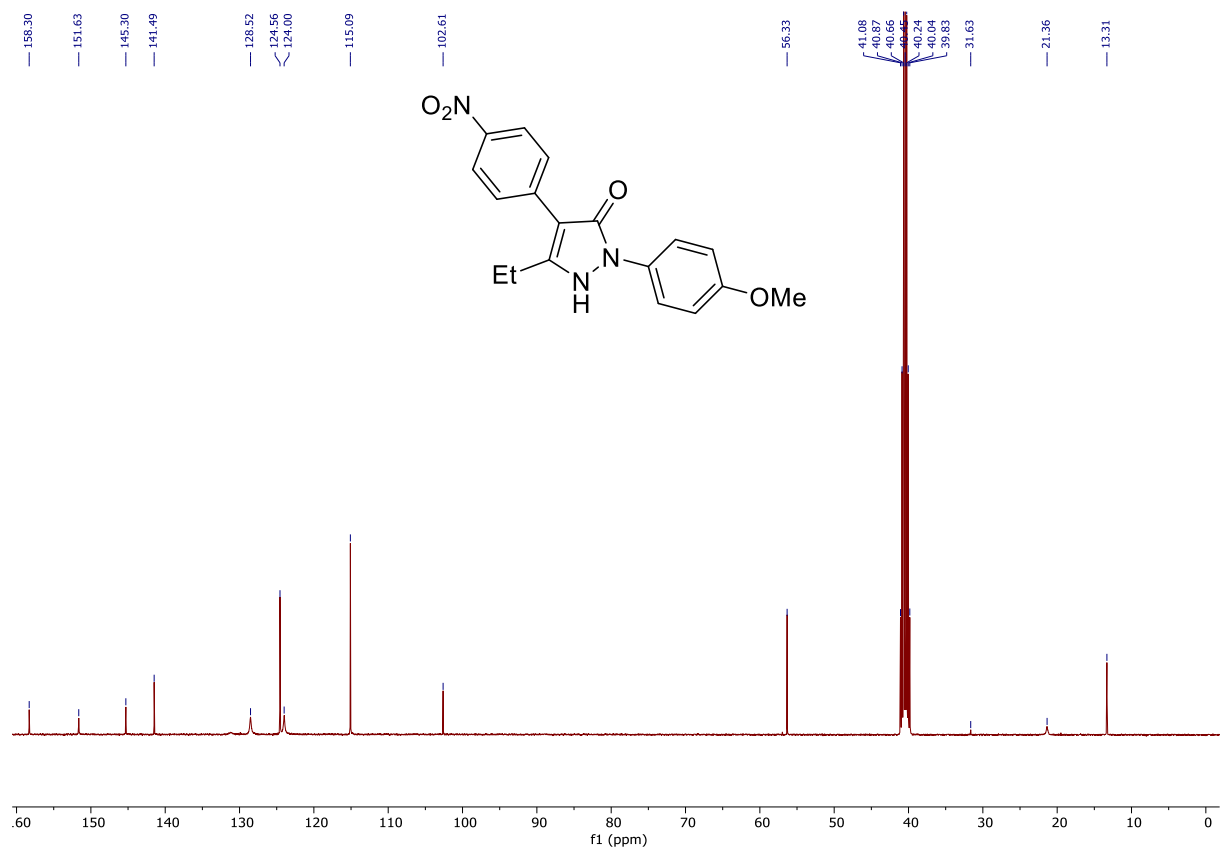

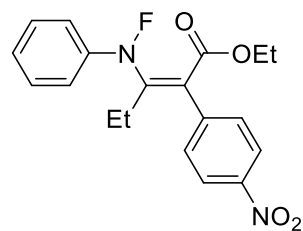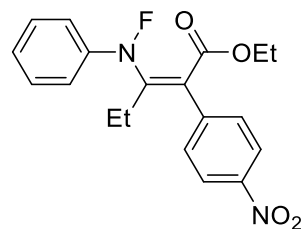

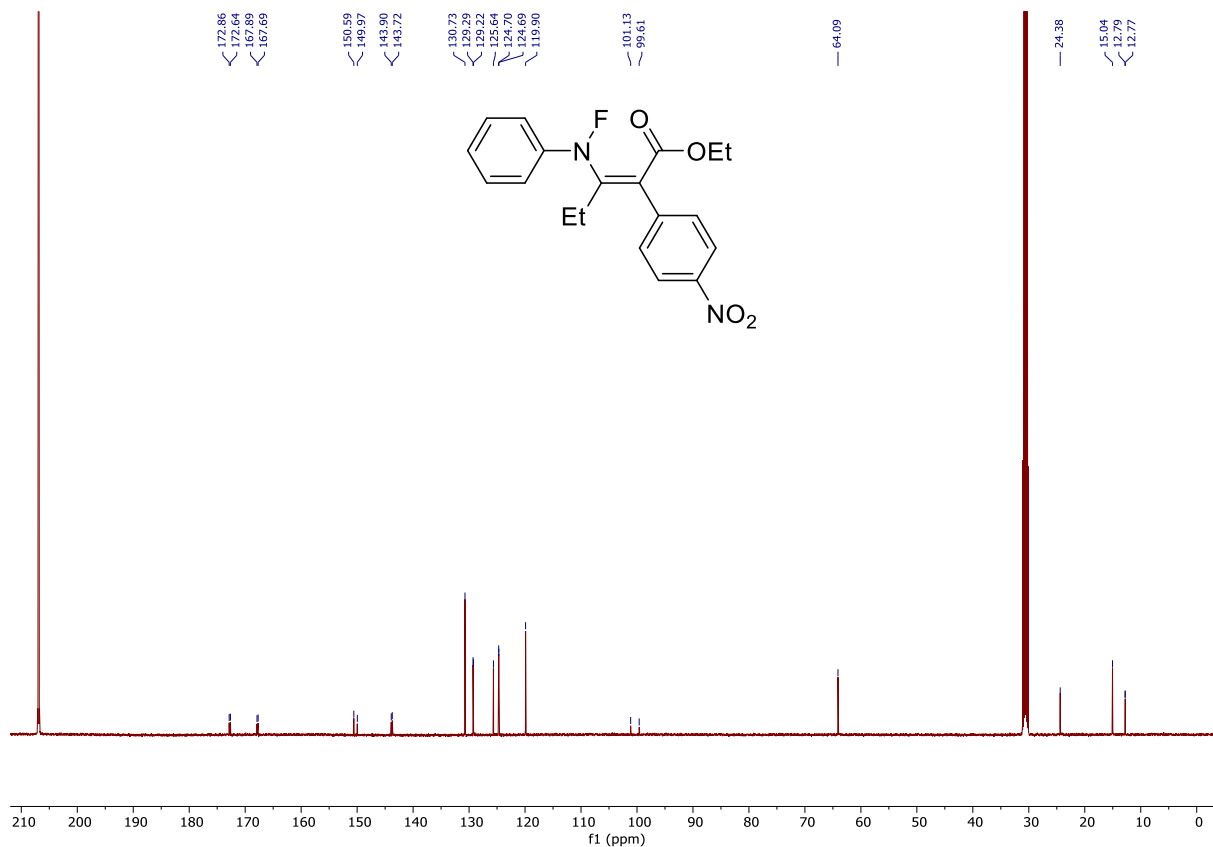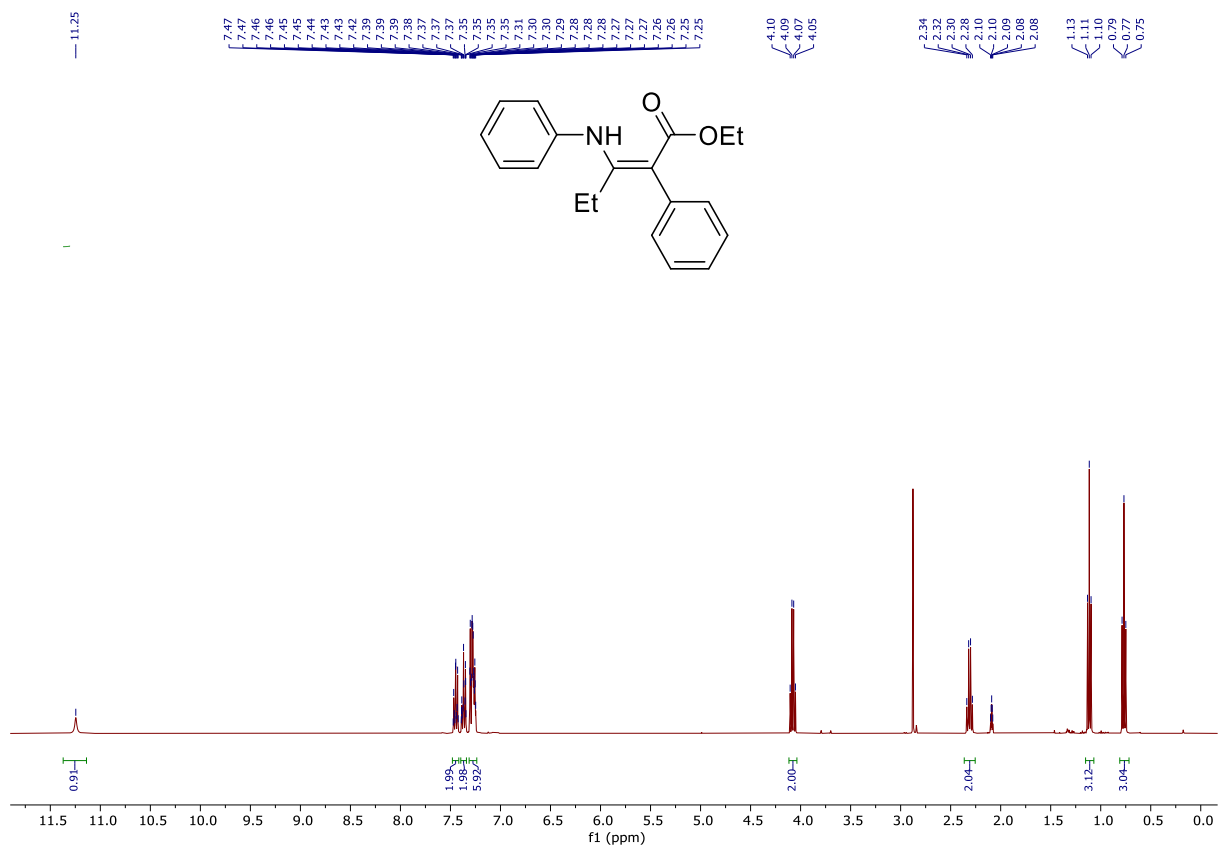

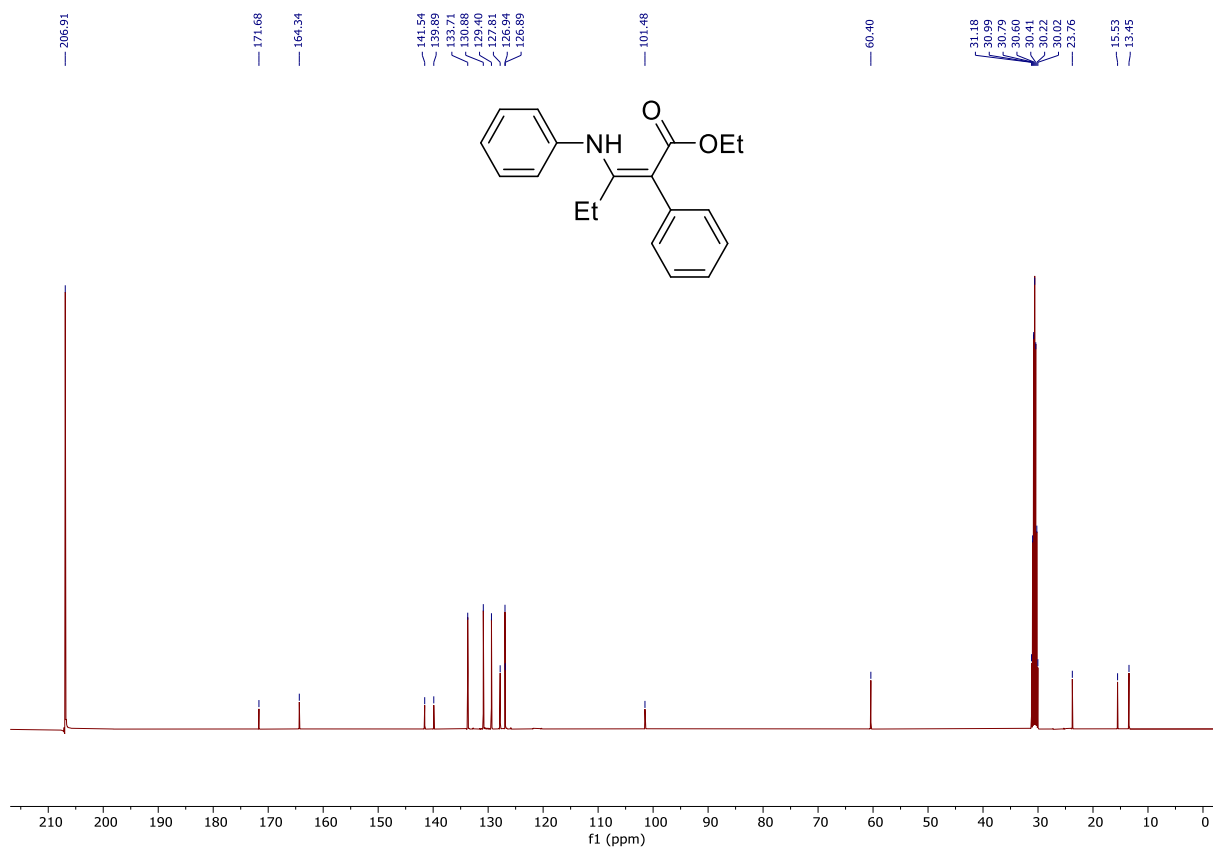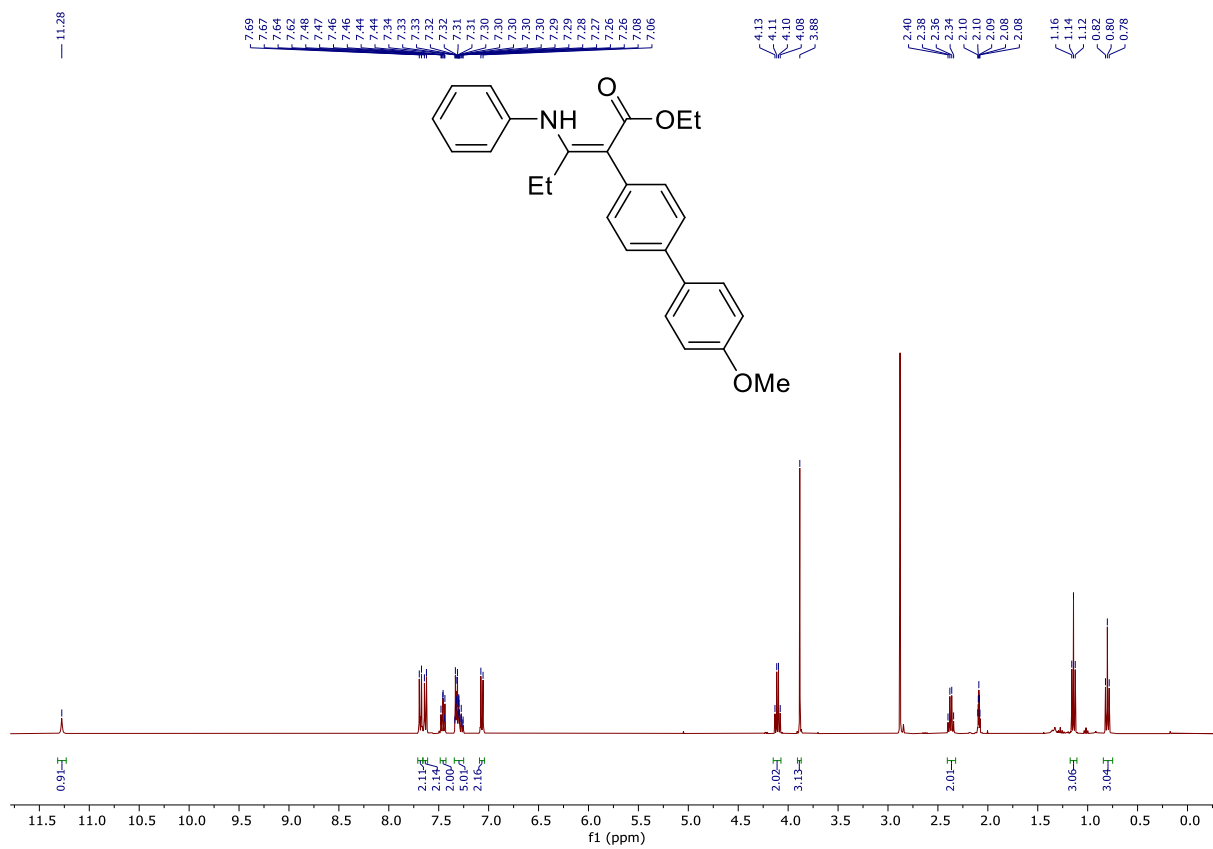



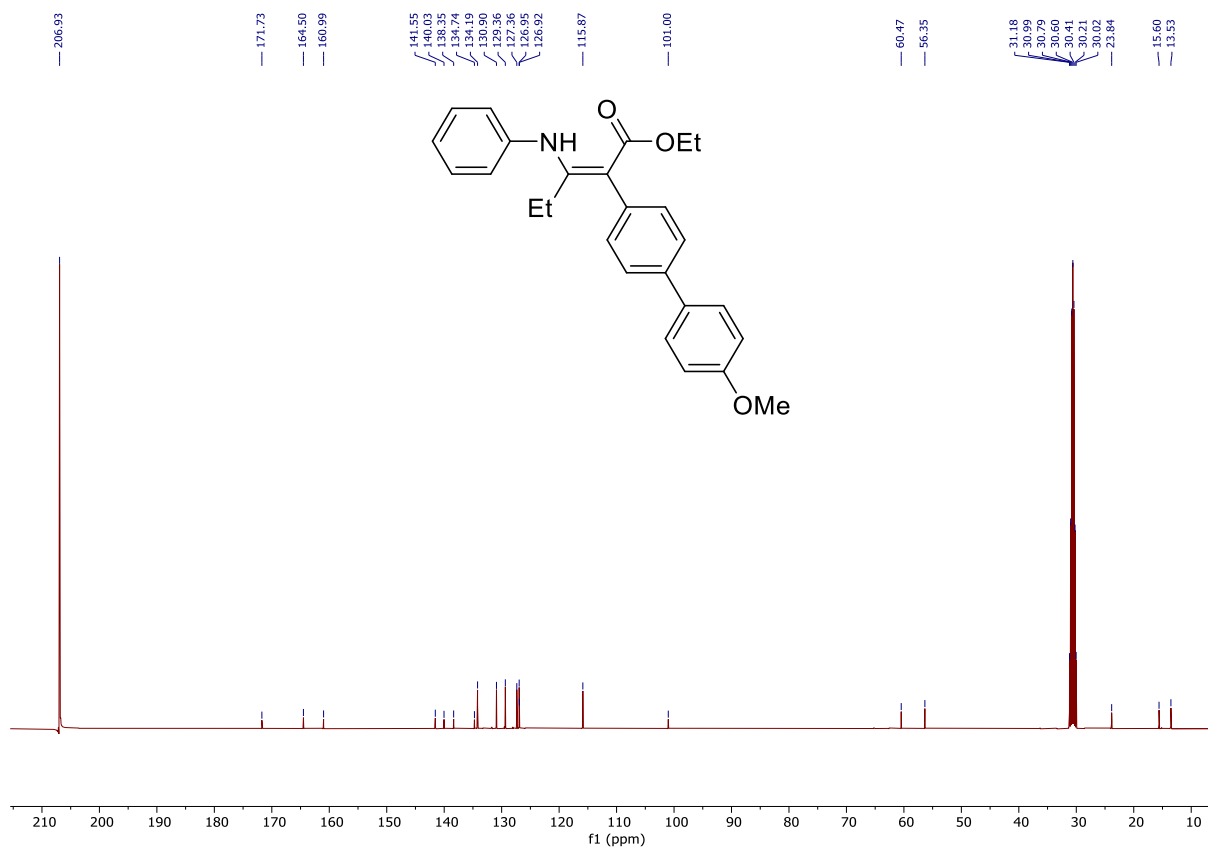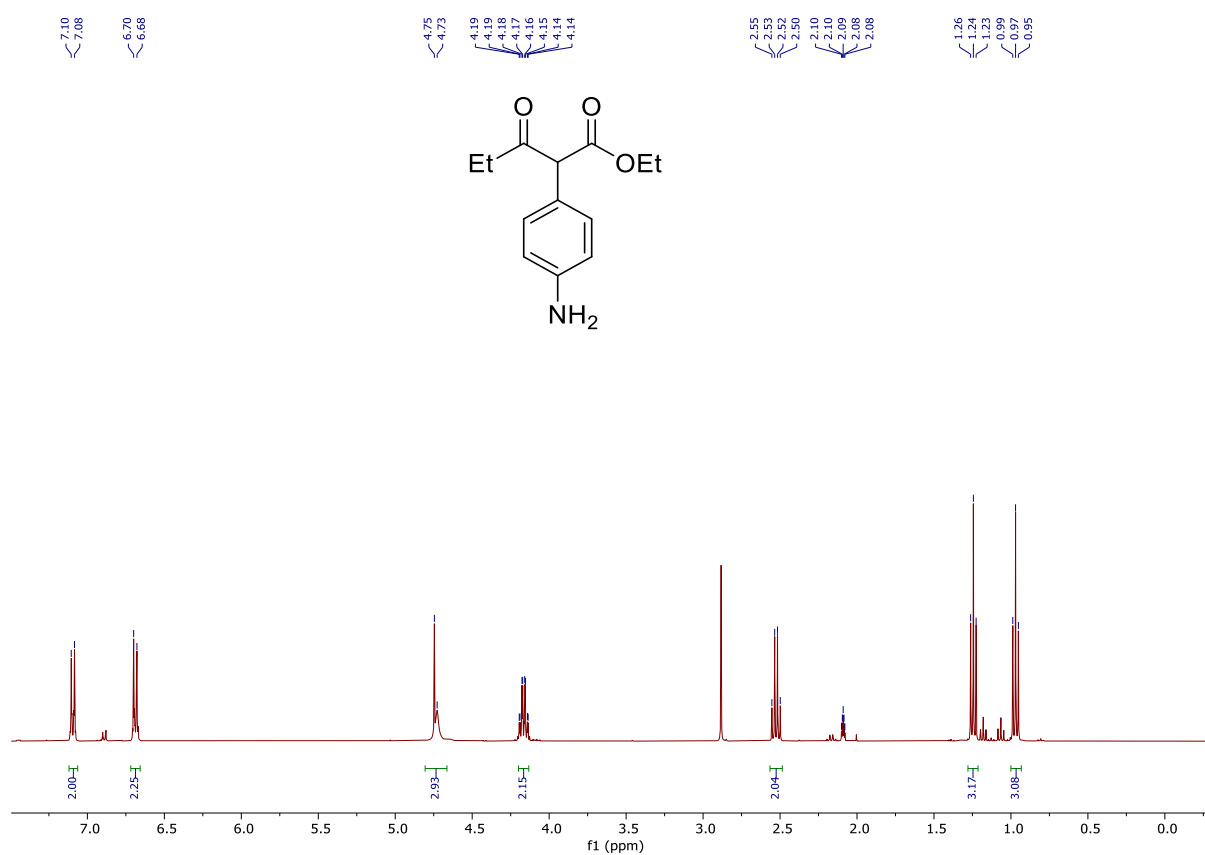

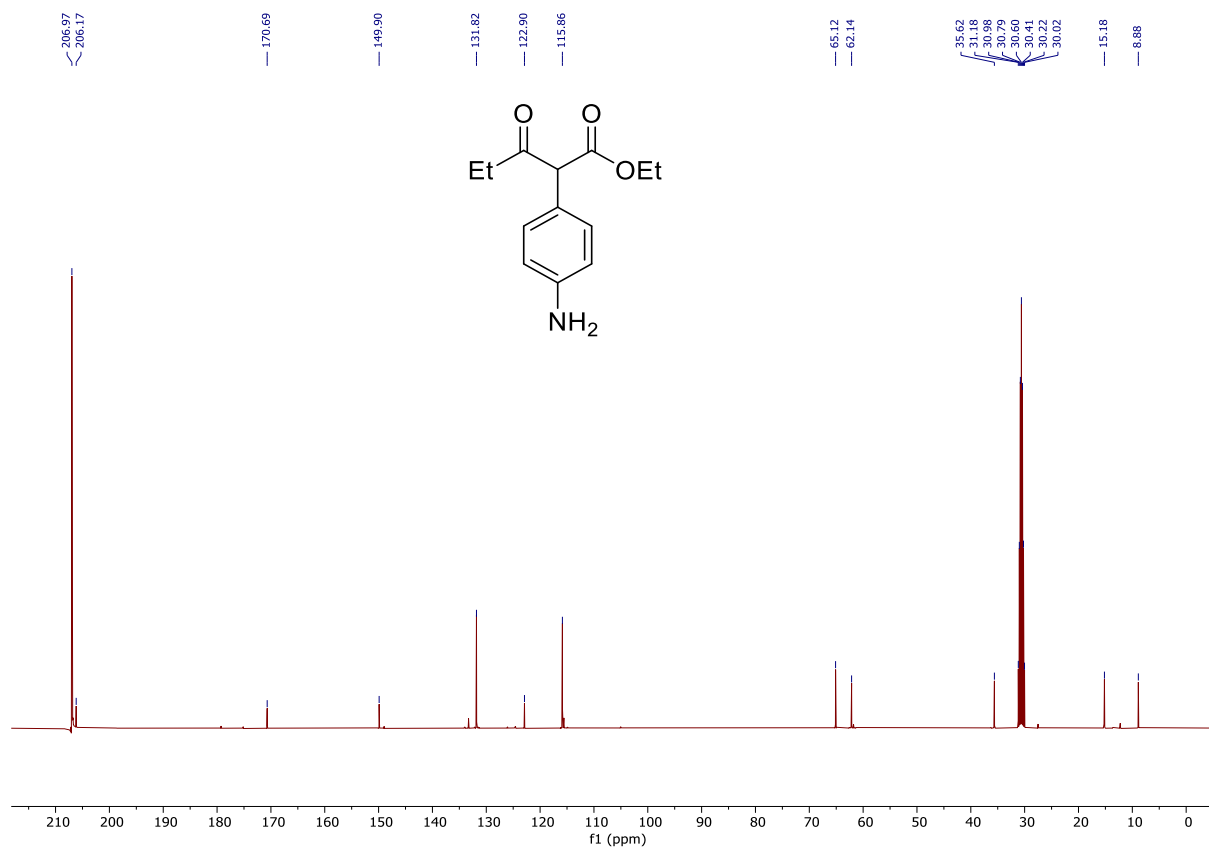

Supplement: d4cc01935k1.pdf [file d4cc01935k1.pdf]
